# Supplementary material for: E- and Z-, di- and tri-substituted alkenyl nitriles through catalytic cross-metathesis
Source: Springer Nature journal article supplement (doi:10.1038/s41557-019-0233-x), 2019-04-01
Supplement: 41557_2019_233_MOESM191_ESM.cif [file 41557_2019_233_MOESM191_ESM.cif]

 
data_C31H51NOSi
 
_audit_creation_method            'SHELXL-2014/7'
_shelx_SHELXL_version_number      '2014/7'
_chemical_name_systematic         ?
_chemical_name_common             ?
_chemical_melting_point           ?
_chemical_formula_moiety          'C31 H51 N O Si' 
_chemical_formula_sum
 'C31 H51 N O Si' 
_chemical_formula_weight          481.81

loop_
 _atom_type_symbol
 _atom_type_description
 _atom_type_scat_dispersion_real
 _atom_type_scat_dispersion_imag
 _atom_type_scat_source
 'C'  'C'   0.0181   0.0091
 'International Tables Vol C Tables 4.2.6.8 and 6.1.1.4'
 'H'  'H'   0.0000   0.0000
 'International Tables Vol C Tables 4.2.6.8 and 6.1.1.4'
 'N'  'N'   0.0311   0.0180
 'International Tables Vol C Tables 4.2.6.8 and 6.1.1.4'
 'O'  'O'   0.0492   0.0322
 'International Tables Vol C Tables 4.2.6.8 and 6.1.1.4'
 'Si'  'Si'   0.2541   0.3302
 'International Tables Vol C Tables 4.2.6.8 and 6.1.1.4'
 
_space_group_crystal_system       orthorhombic
_space_group_IT_number            19
_space_group_name_H-M_alt         'P 21 21 21'
_space_group_name_Hall            'P 2ac 2ab'
 
_shelx_space_group_comment
;
The symmetry employed for this shelxl refinement is uniquely defined
by the following loop, which should always be used as a source of
symmetry information in preference to the above space-group names.
They are only intended as comments.
;
 
loop_
 _space_group_symop_operation_xyz
 'x, y, z'
 '-x+1/2, -y, z+1/2'
 '-x, y+1/2, -z+1/2'
 'x+1/2, -y+1/2, -z'
 
_cell_length_a                    7.3883(3)
_cell_length_b                    10.3271(4)
_cell_length_c                    37.3224(12)
_cell_angle_alpha                 90
_cell_angle_beta                  90
_cell_angle_gamma                 90
_cell_volume                      2847.69(18)
_cell_formula_units_Z             4
_cell_measurement_temperature     100(2)
_cell_measurement_reflns_used     3140
_cell_measurement_theta_min       4.44
_cell_measurement_theta_max       66.46
 
_exptl_crystal_description        needle
_exptl_crystal_colour             colorless
_exptl_crystal_density_meas       'not measured' 
_exptl_crystal_density_method     none
_exptl_crystal_density_diffrn     1.124          
_exptl_crystal_F_000              1064
_exptl_transmission_factor_min    ?
_exptl_transmission_factor_max    ?
_exptl_crystal_size_max           0.240
_exptl_crystal_size_mid           0.140
_exptl_crystal_size_min           0.080
_exptl_absorpt_coefficient_mu     0.880
_shelx_estimated_absorpt_T_min    0.817
_shelx_estimated_absorpt_T_max    0.933
_exptl_absorpt_correction_type    'multi-scan' 
_exptl_absorpt_correction_T_min   0.5740
_exptl_absorpt_correction_T_max   0.7528
_exptl_absorpt_process_details
;
Sheldrick, G.M. (2013). SADABS. Bruker AXS Inc. Madison, WI USA.
;
_exptl_absorpt_special_details    ?
_diffrn_ambient_temperature       100(2)
_diffrn_radiation_wavelength      1.54178
_diffrn_radiation_type            CuK\a
_diffrn_source                    'microfocus sealed tube'
_diffrn_source_type               'Incoatec I\uS'
_diffrn_radiation_monochromator   mirrors 
_diffrn_measurement_device_type   'Bruker Kappa DUO CCD diffractometer'
_diffrn_measurement_method        '\f and \w scans'  
_diffrn_detector_area_resol_mean  ?
_diffrn_reflns_number             17845
_diffrn_reflns_av_unetI/netI      0.0964
_diffrn_reflns_av_R_equivalents   0.1240
_diffrn_reflns_limit_h_min        -8
_diffrn_reflns_limit_h_max        8
_diffrn_reflns_limit_k_min        -12
_diffrn_reflns_limit_k_max        11
_diffrn_reflns_limit_l_min        -44
_diffrn_reflns_limit_l_max        43
_diffrn_reflns_theta_min          2.368
_diffrn_reflns_theta_max          66.795
_diffrn_reflns_theta_full         66.795
_diffrn_measured_fraction_theta_max   0.998
_diffrn_measured_fraction_theta_full  0.998
_diffrn_reflns_Laue_measured_fraction_max    0.998
_diffrn_reflns_Laue_measured_fraction_full   0.998
_diffrn_reflns_point_group_measured_fraction_max   0.988
_diffrn_reflns_point_group_measured_fraction_full  0.988
_reflns_number_total              4987
_reflns_number_gt                 3824
_reflns_threshold_expression      'I > 2\s(I)'
_reflns_Friedel_coverage          0.711
_reflns_Friedel_fraction_max      0.973
_reflns_Friedel_fraction_full     0.974
 
_reflns_special_details
;
 Reflections were merged by SHELXL according to the crystal
 class for the calculation of statistics and refinement.
 
 _reflns_Friedel_fraction is defined as the number of unique
 Friedel pairs measured divided by the number that would be
 possible theoretically, ignoring centric projections and
 systematic absences.
;
 
_computing_data_collection        'APEX2 (Bruker, 2014)'
_computing_cell_refinement        'SAINT (Bruker, 2014)'
_computing_data_reduction         'SAINT (Bruker, 2014)'
_computing_structure_solution     'SHELXL-2014 (Sheldrick, 2014)'
_computing_structure_refinement   'SHELXL-2014 (Sheldrick, 2014)'
_computing_molecular_graphics     'Bruker SHELXTL'
_computing_publication_material   'Bruker SHELXTL'
_refine_special_details           ?
_refine_ls_structure_factor_coef  Fsqd
_refine_ls_matrix_type            full
_refine_ls_weighting_scheme       calc
_refine_ls_weighting_details
'w=1/[\s^2^(Fo^2^)+(0.0472P)^2^] where P=(Fo^2^+2Fc^2^)/3'
_atom_sites_solution_primary      direct
_atom_sites_solution_secondary    difmap
_atom_sites_solution_hydrogens    geom
_refine_ls_hydrogen_treatment     constr
_refine_ls_extinction_method      none
_refine_ls_extinction_coef        .
_refine_ls_abs_structure_details
;
 Flack x determined using 1248 quotients [(I+)-(I-)]/[(I+)+(I-)]
 (Parsons, Flack and Wagner, Acta Cryst. B69 (2013) 249-259).
;
_refine_ls_abs_structure_Flack    -0.01(4)
_chemical_absolute_configuration  ad
_refine_ls_number_reflns          4987
_refine_ls_number_parameters      314
_refine_ls_number_restraints      0
_refine_ls_R_factor_all           0.0786
_refine_ls_R_factor_gt            0.0510
_refine_ls_wR_factor_ref          0.1182
_refine_ls_wR_factor_gt           0.1064
_refine_ls_goodness_of_fit_ref    0.991
_refine_ls_restrained_S_all       0.991
_refine_ls_shift/su_max           0.000
_refine_ls_shift/su_mean          0.000
 
loop_
 _atom_site_label
 _atom_site_type_symbol
 _atom_site_fract_x
 _atom_site_fract_y
 _atom_site_fract_z
 _atom_site_U_iso_or_equiv
 _atom_site_adp_type
 _atom_site_occupancy
 _atom_site_site_symmetry_order  
 _atom_site_calc_flag
 _atom_site_refinement_flags_posn
 _atom_site_refinement_flags_adp
 _atom_site_refinement_flags_occupancy
 _atom_site_disorder_assembly
 _atom_site_disorder_group
Si1 Si 0.17324(16) 0.77182(11) 0.64674(3) 0.0210(3) Uani 1 1 d . . . . .
O1 O 0.2164(4) 0.6191(3) 0.63867(7) 0.0214(6) Uani 1 1 d . . . . .
N1 N 0.9031(8) 0.1713(5) 0.70252(14) 0.0559(14) Uani 1 1 d . . . . .
C1 C 0.7556(9) 0.2012(5) 0.70742(14) 0.0407(13) Uani 1 1 d . . . . .
C2 C 0.5706(7) 0.2348(5) 0.71415(12) 0.0377(12) Uani 1 1 d . . . . .
H2 H 0.4816 0.1704 0.7097 0.045 Uiso 1 1 calc R U . . .
C3 C 0.5132(7) 0.3489(5) 0.72620(11) 0.0315(11) Uani 1 1 d . . . . .
C4 C 0.3168(7) 0.3739(5) 0.73285(12) 0.0337(11) Uani 1 1 d . . . . .
H4A H 0.3019 0.4076 0.7575 0.040 Uiso 1 1 calc R U . . .
H4B H 0.2503 0.2908 0.7313 0.040 Uiso 1 1 calc R U . . .
C5 C 0.2308(7) 0.4715(5) 0.70617(11) 0.0327(11) Uani 1 1 d . . . . .
H5A H 0.1076 0.4944 0.7145 0.039 Uiso 1 1 calc R U . . .
H5B H 0.3041 0.5517 0.7057 0.039 Uiso 1 1 calc R U . . .
C6 C 0.2198(6) 0.4157(4) 0.66845(11) 0.0257(10) Uani 1 1 d . . . . .
H6A H 0.1597 0.3301 0.6698 0.031 Uiso 1 1 calc R U . . .
H6B H 0.3445 0.4011 0.6596 0.031 Uiso 1 1 calc R U . . .
C7 C 0.1182(6) 0.4992(4) 0.64073(10) 0.0218(9) Uani 1 1 d . . . . .
C8 C -0.0855(6) 0.5169(4) 0.65088(11) 0.0239(9) Uani 1 1 d . . . . .
H8A H -0.1044 0.4969 0.6766 0.029 Uiso 1 1 calc R U . . .
H8B H -0.1239 0.6074 0.6465 0.029 Uiso 1 1 calc R U . . .
C9 C -0.1955(6) 0.4234(4) 0.62739(11) 0.0234(9) Uani 1 1 d . . . . .
H9A H -0.2765 0.3692 0.6423 0.028 Uiso 1 1 calc R U . . .
H9B H -0.2694 0.4715 0.6097 0.028 Uiso 1 1 calc R U . . .
C10 C -0.0535(5) 0.3403(4) 0.60858(11) 0.0194(9) Uani 1 1 d . . . . .
H10 H -0.0131 0.2740 0.6264 0.023 Uiso 1 1 calc R U . . .
C11 C -0.1081(5) 0.2661(4) 0.57490(10) 0.0180(8) Uani 1 1 d . . . . .
H11 H -0.1440 0.3302 0.5561 0.022 Uiso 1 1 calc R U . . .
C12 C -0.2657(6) 0.1754(4) 0.58121(11) 0.0204(9) Uani 1 1 d . . . . .
H12A H -0.3711 0.2254 0.5900 0.024 Uiso 1 1 calc R U . . .
H12B H -0.2327 0.1114 0.5999 0.024 Uiso 1 1 calc R U . . .
C13 C -0.3169(6) 0.1044(4) 0.54665(11) 0.0223(9) Uani 1 1 d . . . . .
H13A H -0.4137 0.0410 0.5519 0.027 Uiso 1 1 calc R U . . .
H13B H -0.3653 0.1677 0.5292 0.027 Uiso 1 1 calc R U . . .
C14 C -0.1589(6) 0.0353(4) 0.53032(10) 0.0201(9) Uani 1 1 d . . . . .
C15 C -0.1724(6) -0.0868(4) 0.51953(11) 0.0239(9) Uani 1 1 d . . . . .
H15 H -0.2821 -0.1314 0.5244 0.029 Uiso 1 1 calc R U . . .
C16 C -0.0259(6) -0.1591(4) 0.50014(12) 0.0276(10) Uani 1 1 d . . . . .
H16A H -0.0799 -0.2105 0.4805 0.033 Uiso 1 1 calc R U . . .
H16B H 0.0344 -0.2196 0.5169 0.033 Uiso 1 1 calc R U . . .
C17 C 0.1133(6) -0.0656(4) 0.48481(11) 0.0252(10) Uani 1 1 d . . . . .
H17A H 0.0606 -0.0189 0.4641 0.030 Uiso 1 1 calc R U . . .
H17B H 0.2202 -0.1145 0.4763 0.030 Uiso 1 1 calc R U . . .
C18 C 0.1713(6) 0.0315(4) 0.51340(10) 0.0212(9) Uani 1 1 d . . . . .
H18A H 0.2670 0.0882 0.5035 0.025 Uiso 1 1 calc R U . . .
H18B H 0.2229 -0.0159 0.5341 0.025 Uiso 1 1 calc R U . . .
C19 C 0.0124(6) 0.1154(4) 0.52630(11) 0.0195(9) Uani 1 1 d . . . . .
H19 H -0.0113 0.1816 0.5073 0.023 Uiso 1 1 calc R U . . .
C20 C 0.0570(5) 0.1891(4) 0.56105(11) 0.0192(9) Uani 1 1 d . . . . .
H20 H 0.0859 0.1225 0.5796 0.023 Uiso 1 1 calc R U . . .
C21 C 0.2256(5) 0.2749(4) 0.55704(10) 0.0204(9) Uani 1 1 d . . . . .
H21A H 0.2066 0.3355 0.5368 0.024 Uiso 1 1 calc R U . . .
H21B H 0.3306 0.2194 0.5510 0.024 Uiso 1 1 calc R U . . .
C22 C 0.2698(6) 0.3531(4) 0.59087(11) 0.0203(9) Uani 1 1 d . . . . .
H22A H 0.3063 0.2932 0.6103 0.024 Uiso 1 1 calc R U . . .
H22B H 0.3730 0.4116 0.5859 0.024 Uiso 1 1 calc R U . . .
C23 C 0.1068(6) 0.4334(4) 0.60323(10) 0.0180(9) Uani 1 1 d . . . . .
C24 C 0.6415(7) 0.4570(5) 0.73463(13) 0.0355(12) Uani 1 1 d . . . . .
H24A H 0.7658 0.4287 0.7299 0.053 Uiso 1 1 calc R U . . .
H24B H 0.6295 0.4810 0.7599 0.053 Uiso 1 1 calc R U . . .
H24C H 0.6131 0.5320 0.7196 0.053 Uiso 1 1 calc R U . . .
C25 C 0.0821(6) 0.7997(4) 0.69281(12) 0.0285(10) Uani 1 1 d . . . . .
H25A H -0.0302 0.7504 0.6959 0.043 Uiso 1 1 calc R U . . .
H25B H 0.0573 0.8922 0.6961 0.043 Uiso 1 1 calc R U . . .
H25C H 0.1713 0.7712 0.7106 0.043 Uiso 1 1 calc R U . . .
C26 C 0.0100(6) 0.8465(4) 0.61504(12) 0.0269(10) Uani 1 1 d . . . . .
H26A H 0.0618 0.8466 0.5909 0.040 Uiso 1 1 calc R U . . .
H26B H -0.0152 0.9357 0.6225 0.040 Uiso 1 1 calc R U . . .
H26C H -0.1028 0.7965 0.6150 0.040 Uiso 1 1 calc R U . . .
C27 C 0.4008(6) 0.8512(4) 0.64075(11) 0.0231(9) Uani 1 1 d . . . . .
C28 C 0.4765(7) 0.8203(5) 0.60321(11) 0.0309(11) Uani 1 1 d . . . . .
H28A H 0.3905 0.8495 0.5849 0.046 Uiso 1 1 calc R U . . .
H28B H 0.4949 0.7267 0.6009 0.046 Uiso 1 1 calc R U . . .
H28C H 0.5923 0.8650 0.5999 0.046 Uiso 1 1 calc R U . . .
C29 C 0.5343(6) 0.7991(5) 0.66887(11) 0.0307(11) Uani 1 1 d . . . . .
H29A H 0.6517 0.8421 0.6660 0.046 Uiso 1 1 calc R U . . .
H29B H 0.5493 0.7056 0.6656 0.046 Uiso 1 1 calc R U . . .
H29C H 0.4872 0.8165 0.6929 0.046 Uiso 1 1 calc R U . . .
C30 C 0.3840(7) 0.9981(4) 0.64487(15) 0.0384(12) Uani 1 1 d . . . . .
H30A H 0.3217 1.0182 0.6674 0.058 Uiso 1 1 calc R U . . .
H30B H 0.3144 1.0333 0.6247 0.058 Uiso 1 1 calc R U . . .
H30C H 0.5049 1.0371 0.6451 0.058 Uiso 1 1 calc R U . . .
C31 C 0.0651(6) 0.5379(4) 0.57511(11) 0.0218(9) Uani 1 1 d . . . . .
H31A H 0.1723 0.5923 0.5715 0.033 Uiso 1 1 calc R U . . .
H31B H -0.0358 0.5916 0.5834 0.033 Uiso 1 1 calc R U . . .
H31C H 0.0323 0.4964 0.5524 0.033 Uiso 1 1 calc R U . . .
 
loop_
 _atom_site_aniso_label
 _atom_site_aniso_U_11
 _atom_site_aniso_U_22
 _atom_site_aniso_U_33
 _atom_site_aniso_U_23
 _atom_site_aniso_U_13
 _atom_site_aniso_U_12
Si1 0.0175(5) 0.0218(5) 0.0236(6) -0.0009(5) -0.0005(5) 0.0007(5)
O1 0.0199(15) 0.0193(13) 0.0251(15) -0.0008(12) 0.0000(12) -0.0025(12)
N1 0.059(4) 0.047(3) 0.062(3) 0.008(2) 0.012(3) 0.016(3)
C1 0.057(4) 0.034(3) 0.031(3) 0.003(2) 0.004(3) 0.007(3)
C2 0.044(3) 0.036(3) 0.033(3) 0.003(2) -0.001(2) -0.004(3)
C3 0.038(3) 0.038(3) 0.019(2) 0.008(2) -0.002(2) 0.000(2)
C4 0.032(3) 0.046(3) 0.024(2) 0.008(2) -0.002(2) -0.004(3)
C5 0.034(3) 0.040(3) 0.024(2) -0.001(2) -0.003(2) 0.006(2)
C6 0.026(2) 0.029(2) 0.022(2) 0.0018(19) -0.0034(18) 0.002(2)
C7 0.026(2) 0.024(2) 0.016(2) 0.0019(17) -0.0003(17) -0.0018(18)
C8 0.023(2) 0.027(2) 0.022(2) -0.0011(19) 0.0002(19) 0.0017(19)
C9 0.018(2) 0.025(2) 0.027(2) 0.0005(18) 0.0016(19) 0.0012(19)
C10 0.016(2) 0.022(2) 0.021(2) 0.0012(17) 0.0012(17) 0.0006(18)
C11 0.0146(19) 0.019(2) 0.021(2) 0.0031(17) 0.0012(16) 0.0004(17)
C12 0.017(2) 0.022(2) 0.022(2) -0.0020(17) 0.0013(17) 0.0033(18)
C13 0.016(2) 0.022(2) 0.028(2) 0.0031(17) 0.0000(19) -0.0045(19)
C14 0.017(2) 0.023(2) 0.021(2) 0.0038(17) -0.0053(18) -0.0016(19)
C15 0.022(2) 0.023(2) 0.026(2) 0.0030(18) 0.003(2) -0.004(2)
C16 0.028(3) 0.026(2) 0.028(2) -0.005(2) 0.003(2) 0.000(2)
C17 0.024(2) 0.025(2) 0.027(2) -0.0048(18) 0.0019(19) 0.0037(19)
C18 0.0164(19) 0.024(2) 0.023(2) -0.0005(18) 0.0020(19) -0.002(2)
C19 0.015(2) 0.021(2) 0.022(2) 0.0010(18) 0.0019(17) 0.0009(18)
C20 0.017(2) 0.019(2) 0.022(2) 0.0000(17) 0.0003(17) 0.0005(18)
C21 0.016(2) 0.023(2) 0.022(2) 0.0001(18) 0.0030(16) 0.0005(18)
C22 0.015(2) 0.023(2) 0.023(2) -0.0018(18) -0.0003(17) -0.0030(18)
C23 0.016(2) 0.019(2) 0.019(2) -0.0016(17) 0.0012(17) 0.0005(18)
C24 0.033(3) 0.034(3) 0.039(3) 0.008(2) 0.001(2) -0.002(2)
C25 0.023(2) 0.026(2) 0.037(3) -0.003(2) 0.004(2) 0.000(2)
C26 0.024(2) 0.024(2) 0.033(2) 0.004(2) -0.005(2) 0.000(2)
C27 0.020(2) 0.026(2) 0.024(2) -0.0008(19) -0.0030(19) -0.0071(19)
C28 0.026(2) 0.038(3) 0.029(2) 0.000(2) 0.000(2) -0.003(2)
C29 0.021(2) 0.045(3) 0.025(2) -0.002(2) -0.0040(19) -0.004(2)
C30 0.035(3) 0.031(2) 0.049(3) -0.009(3) 0.000(3) -0.012(2)
C31 0.020(2) 0.023(2) 0.022(2) 0.0011(18) 0.0004(18) -0.0018(19)
 
_geom_special_details
;
 All esds (except the esd in the dihedral angle between two l.s. planes)
 are estimated using the full covariance matrix.  The cell esds are taken
 into account individually in the estimation of esds in distances, angles
 and torsion angles; correlations between esds in cell parameters are only
 used when they are defined by crystal symmetry.  An approximate (isotropic)
 treatment of cell esds is used for estimating esds involving l.s. planes.
;
 
loop_
 _geom_bond_atom_site_label_1
 _geom_bond_atom_site_label_2
 _geom_bond_distance
 _geom_bond_site_symmetry_2
 _geom_bond_publ_flag
Si1 O1 1.637(3) . ?
Si1 C26 1.857(4) . ?
Si1 C25 1.869(4) . ?
Si1 C27 1.884(4) . ?
O1 C7 1.437(5) . ?
N1 C1 1.147(7) . ?
C1 C2 1.433(8) . ?
C2 C3 1.330(7) . ?
C2 H2 0.9500 . ?
C3 C4 1.495(7) . ?
C3 C24 1.498(7) . ?
C4 C5 1.553(6) . ?
C4 H4A 0.9900 . ?
C4 H4B 0.9900 . ?
C5 C6 1.523(6) . ?
C5 H5A 0.9900 . ?
C5 H5B 0.9900 . ?
C6 C7 1.542(6) . ?
C6 H6A 0.9900 . ?
C6 H6B 0.9900 . ?
C7 C23 1.558(5) . ?
C7 C8 1.562(6) . ?
C8 C9 1.537(6) . ?
C8 H8A 0.9900 . ?
C8 H8B 0.9900 . ?
C9 C10 1.526(6) . ?
C9 H9A 0.9900 . ?
C9 H9B 0.9900 . ?
C10 C11 1.526(6) . ?
C10 C23 1.539(6) . ?
C10 H10 1.0000 . ?
C11 C12 1.512(6) . ?
C11 C20 1.545(5) . ?
C11 H11 1.0000 . ?
C12 C13 1.531(6) . ?
C12 H12A 0.9900 . ?
C12 H12B 0.9900 . ?
C13 C14 1.498(6) . ?
C13 H13A 0.9900 . ?
C13 H13B 0.9900 . ?
C14 C15 1.328(6) . ?
C14 C19 1.519(6) . ?
C15 C16 1.501(6) . ?
C15 H15 0.9500 . ?
C16 C17 1.522(6) . ?
C16 H16A 0.9900 . ?
C16 H16B 0.9900 . ?
C17 C18 1.525(6) . ?
C17 H17A 0.9900 . ?
C17 H17B 0.9900 . ?
C18 C19 1.537(6) . ?
C18 H18A 0.9900 . ?
C18 H18B 0.9900 . ?
C19 C20 1.539(6) . ?
C19 H19 1.0000 . ?
C20 C21 1.536(6) . ?
C20 H20 1.0000 . ?
C21 C22 1.534(6) . ?
C21 H21A 0.9900 . ?
C21 H21B 0.9900 . ?
C22 C23 1.533(6) . ?
C22 H22A 0.9900 . ?
C22 H22B 0.9900 . ?
C23 C31 1.536(6) . ?
C24 H24A 0.9800 . ?
C24 H24B 0.9800 . ?
C24 H24C 0.9800 . ?
C25 H25A 0.9800 . ?
C25 H25B 0.9800 . ?
C25 H25C 0.9800 . ?
C26 H26A 0.9800 . ?
C26 H26B 0.9800 . ?
C26 H26C 0.9800 . ?
C27 C30 1.530(6) . ?
C27 C29 1.537(6) . ?
C27 C28 1.542(6) . ?
C28 H28A 0.9800 . ?
C28 H28B 0.9800 . ?
C28 H28C 0.9800 . ?
C29 H29A 0.9800 . ?
C29 H29B 0.9800 . ?
C29 H29C 0.9800 . ?
C30 H30A 0.9800 . ?
C30 H30B 0.9800 . ?
C30 H30C 0.9800 . ?
C31 H31A 0.9800 . ?
C31 H31B 0.9800 . ?
C31 H31C 0.9800 . ?
 
loop_
 _geom_angle_atom_site_label_1
 _geom_angle_atom_site_label_2
 _geom_angle_atom_site_label_3
 _geom_angle
 _geom_angle_site_symmetry_1
 _geom_angle_site_symmetry_3
 _geom_angle_publ_flag
O1 Si1 C26 114.15(18) . . ?
O1 Si1 C25 112.84(18) . . ?
C26 Si1 C25 106.7(2) . . ?
O1 Si1 C27 102.91(17) . . ?
C26 Si1 C27 108.9(2) . . ?
C25 Si1 C27 111.3(2) . . ?
C7 O1 Si1 136.2(3) . . ?
N1 C1 C2 178.2(6) . . ?
C3 C2 C1 125.3(5) . . ?
C3 C2 H2 117.4 . . ?
C1 C2 H2 117.4 . . ?
C2 C3 C4 121.2(5) . . ?
C2 C3 C24 122.0(5) . . ?
C4 C3 C24 116.8(4) . . ?
C3 C4 C5 113.7(4) . . ?
C3 C4 H4A 108.8 . . ?
C5 C4 H4A 108.8 . . ?
C3 C4 H4B 108.8 . . ?
C5 C4 H4B 108.8 . . ?
H4A C4 H4B 107.7 . . ?
C6 C5 C4 111.6(4) . . ?
C6 C5 H5A 109.3 . . ?
C4 C5 H5A 109.3 . . ?
C6 C5 H5B 109.3 . . ?
C4 C5 H5B 109.3 . . ?
H5A C5 H5B 108.0 . . ?
C5 C6 C7 115.8(4) . . ?
C5 C6 H6A 108.3 . . ?
C7 C6 H6A 108.3 . . ?
C5 C6 H6B 108.3 . . ?
C7 C6 H6B 108.3 . . ?
H6A C6 H6B 107.4 . . ?
O1 C7 C6 105.8(3) . . ?
O1 C7 C23 110.8(3) . . ?
C6 C7 C23 112.6(3) . . ?
O1 C7 C8 113.5(3) . . ?
C6 C7 C8 111.8(3) . . ?
C23 C7 C8 102.6(3) . . ?
C9 C8 C7 107.3(3) . . ?
C9 C8 H8A 110.3 . . ?
C7 C8 H8A 110.3 . . ?
C9 C8 H8B 110.3 . . ?
C7 C8 H8B 110.3 . . ?
H8A C8 H8B 108.5 . . ?
C10 C9 C8 104.6(4) . . ?
C10 C9 H9A 110.8 . . ?
C8 C9 H9A 110.8 . . ?
C10 C9 H9B 110.8 . . ?
C8 C9 H9B 110.8 . . ?
H9A C9 H9B 108.9 . . ?
C11 C10 C9 118.6(3) . . ?
C11 C10 C23 114.2(3) . . ?
C9 C10 C23 103.7(3) . . ?
C11 C10 H10 106.5 . . ?
C9 C10 H10 106.5 . . ?
C23 C10 H10 106.5 . . ?
C12 C11 C10 112.7(3) . . ?
C12 C11 C20 109.9(3) . . ?
C10 C11 C20 109.0(3) . . ?
C12 C11 H11 108.4 . . ?
C10 C11 H11 108.4 . . ?
C20 C11 H11 108.4 . . ?
C11 C12 C13 110.8(3) . . ?
C11 C12 H12A 109.5 . . ?
C13 C12 H12A 109.5 . . ?
C11 C12 H12B 109.5 . . ?
C13 C12 H12B 109.5 . . ?
H12A C12 H12B 108.1 . . ?
C14 C13 C12 112.2(4) . . ?
C14 C13 H13A 109.2 . . ?
C12 C13 H13A 109.2 . . ?
C14 C13 H13B 109.2 . . ?
C12 C13 H13B 109.2 . . ?
H13A C13 H13B 107.9 . . ?
C15 C14 C13 121.2(4) . . ?
C15 C14 C19 123.4(4) . . ?
C13 C14 C19 115.5(3) . . ?
C14 C15 C16 124.4(4) . . ?
C14 C15 H15 117.8 . . ?
C16 C15 H15 117.8 . . ?
C15 C16 C17 110.7(4) . . ?
C15 C16 H16A 109.5 . . ?
C17 C16 H16A 109.5 . . ?
C15 C16 H16B 109.5 . . ?
C17 C16 H16B 109.5 . . ?
H16A C16 H16B 108.1 . . ?
C16 C17 C18 110.1(3) . . ?
C16 C17 H17A 109.6 . . ?
C18 C17 H17A 109.6 . . ?
C16 C17 H17B 109.6 . . ?
C18 C17 H17B 109.6 . . ?
H17A C17 H17B 108.2 . . ?
C17 C18 C19 112.1(4) . . ?
C17 C18 H18A 109.2 . . ?
C19 C18 H18A 109.2 . . ?
C17 C18 H18B 109.2 . . ?
C19 C18 H18B 109.2 . . ?
H18A C18 H18B 107.9 . . ?
C14 C19 C20 111.4(3) . . ?
C14 C19 C18 111.1(3) . . ?
C20 C19 C18 112.3(3) . . ?
C14 C19 H19 107.3 . . ?
C20 C19 H19 107.3 . . ?
C18 C19 H19 107.3 . . ?
C21 C20 C19 112.1(3) . . ?
C21 C20 C11 112.1(3) . . ?
C19 C20 C11 111.6(3) . . ?
C21 C20 H20 106.9 . . ?
C19 C20 H20 106.9 . . ?
C11 C20 H20 106.9 . . ?
C20 C21 C22 113.4(3) . . ?
C20 C21 H21A 108.9 . . ?
C22 C21 H21A 108.9 . . ?
C20 C21 H21B 108.9 . . ?
C22 C21 H21B 108.9 . . ?
H21A C21 H21B 107.7 . . ?
C23 C22 C21 111.4(3) . . ?
C23 C22 H22A 109.3 . . ?
C21 C22 H22A 109.3 . . ?
C23 C22 H22B 109.3 . . ?
C21 C22 H22B 109.3 . . ?
H22A C22 H22B 108.0 . . ?
C22 C23 C31 109.4(3) . . ?
C22 C23 C10 107.8(3) . . ?
C31 C23 C10 111.9(3) . . ?
C22 C23 C7 117.6(3) . . ?
C31 C23 C7 108.6(3) . . ?
C10 C23 C7 101.4(3) . . ?
C3 C24 H24A 109.5 . . ?
C3 C24 H24B 109.5 . . ?
H24A C24 H24B 109.5 . . ?
C3 C24 H24C 109.5 . . ?
H24A C24 H24C 109.5 . . ?
H24B C24 H24C 109.5 . . ?
Si1 C25 H25A 109.5 . . ?
Si1 C25 H25B 109.5 . . ?
H25A C25 H25B 109.5 . . ?
Si1 C25 H25C 109.5 . . ?
H25A C25 H25C 109.5 . . ?
H25B C25 H25C 109.5 . . ?
Si1 C26 H26A 109.5 . . ?
Si1 C26 H26B 109.5 . . ?
H26A C26 H26B 109.5 . . ?
Si1 C26 H26C 109.5 . . ?
H26A C26 H26C 109.5 . . ?
H26B C26 H26C 109.5 . . ?
C30 C27 C29 109.3(4) . . ?
C30 C27 C28 109.0(4) . . ?
C29 C27 C28 108.4(4) . . ?
C30 C27 Si1 110.3(3) . . ?
C29 C27 Si1 109.9(3) . . ?
C28 C27 Si1 110.0(3) . . ?
C27 C28 H28A 109.5 . . ?
C27 C28 H28B 109.5 . . ?
H28A C28 H28B 109.5 . . ?
C27 C28 H28C 109.5 . . ?
H28A C28 H28C 109.5 . . ?
H28B C28 H28C 109.5 . . ?
C27 C29 H29A 109.5 . . ?
C27 C29 H29B 109.5 . . ?
H29A C29 H29B 109.5 . . ?
C27 C29 H29C 109.5 . . ?
H29A C29 H29C 109.5 . . ?
H29B C29 H29C 109.5 . . ?
C27 C30 H30A 109.5 . . ?
C27 C30 H30B 109.5 . . ?
H30A C30 H30B 109.5 . . ?
C27 C30 H30C 109.5 . . ?
H30A C30 H30C 109.5 . . ?
H30B C30 H30C 109.5 . . ?
C23 C31 H31A 109.5 . . ?
C23 C31 H31B 109.5 . . ?
H31A C31 H31B 109.5 . . ?
C23 C31 H31C 109.5 . . ?
H31A C31 H31C 109.5 . . ?
H31B C31 H31C 109.5 . . ?
 
loop_
 _geom_torsion_atom_site_label_1
 _geom_torsion_atom_site_label_2
 _geom_torsion_atom_site_label_3
 _geom_torsion_atom_site_label_4
 _geom_torsion
 _geom_torsion_site_symmetry_1
 _geom_torsion_site_symmetry_2
 _geom_torsion_site_symmetry_3
 _geom_torsion_site_symmetry_4
 _geom_torsion_publ_flag
C26 Si1 O1 C7 -68.5(4) . . . . ?
C25 Si1 O1 C7 53.6(4) . . . . ?
C27 Si1 O1 C7 173.7(4) . . . . ?
C1 C2 C3 C4 -179.2(4) . . . . ?
C1 C2 C3 C24 -0.8(8) . . . . ?
C2 C3 C4 C5 -110.9(5) . . . . ?
C24 C3 C4 C5 70.6(5) . . . . ?
C3 C4 C5 C6 68.3(6) . . . . ?
C4 C5 C6 C7 173.8(4) . . . . ?
Si1 O1 C7 C6 -118.1(4) . . . . ?
Si1 O1 C7 C23 119.5(3) . . . . ?
Si1 O1 C7 C8 4.8(5) . . . . ?
C5 C6 C7 O1 60.9(5) . . . . ?
C5 C6 C7 C23 -178.0(4) . . . . ?
C5 C6 C7 C8 -63.1(5) . . . . ?
O1 C7 C8 C9 138.9(3) . . . . ?
C6 C7 C8 C9 -101.6(4) . . . . ?
C23 C7 C8 C9 19.3(4) . . . . ?
C7 C8 C9 C10 8.3(4) . . . . ?
C8 C9 C10 C11 -161.2(3) . . . . ?
C8 C9 C10 C23 -33.3(4) . . . . ?
C9 C10 C11 C12 -57.3(5) . . . . ?
C23 C10 C11 C12 179.9(3) . . . . ?
C9 C10 C11 C20 -179.6(3) . . . . ?
C23 C10 C11 C20 57.5(4) . . . . ?
C10 C11 C12 C13 179.4(3) . . . . ?
C20 C11 C12 C13 -58.9(4) . . . . ?
C11 C12 C13 C14 54.5(4) . . . . ?
C12 C13 C14 C15 132.3(4) . . . . ?
C12 C13 C14 C19 -49.2(5) . . . . ?
C13 C14 C15 C16 174.6(4) . . . . ?
C19 C14 C15 C16 -3.8(7) . . . . ?
C14 C15 C16 C17 -17.0(6) . . . . ?
C15 C16 C17 C18 48.4(5) . . . . ?
C16 C17 C18 C19 -62.2(5) . . . . ?
C15 C14 C19 C20 -134.1(4) . . . . ?
C13 C14 C19 C20 47.5(5) . . . . ?
C15 C14 C19 C18 -8.1(6) . . . . ?
C13 C14 C19 C18 173.5(3) . . . . ?
C17 C18 C19 C14 40.5(5) . . . . ?
C17 C18 C19 C20 165.9(3) . . . . ?
C14 C19 C20 C21 -177.7(3) . . . . ?
C18 C19 C20 C21 56.9(4) . . . . ?
C14 C19 C20 C11 -51.1(4) . . . . ?
C18 C19 C20 C11 -176.4(3) . . . . ?
C12 C11 C20 C21 -175.4(3) . . . . ?
C10 C11 C20 C21 -51.4(4) . . . . ?
C12 C11 C20 C19 57.9(4) . . . . ?
C10 C11 C20 C19 -178.1(3) . . . . ?
C19 C20 C21 C22 178.0(3) . . . . ?
C11 C20 C21 C22 51.7(5) . . . . ?
C20 C21 C22 C23 -54.3(5) . . . . ?
C21 C22 C23 C31 -66.1(4) . . . . ?
C21 C22 C23 C10 55.8(4) . . . . ?
C21 C22 C23 C7 169.5(3) . . . . ?
C11 C10 C23 C22 -59.8(4) . . . . ?
C9 C10 C23 C22 169.6(3) . . . . ?
C11 C10 C23 C31 60.5(4) . . . . ?
C9 C10 C23 C31 -70.1(4) . . . . ?
C11 C10 C23 C7 176.0(3) . . . . ?
C9 C10 C23 C7 45.4(4) . . . . ?
O1 C7 C23 C22 82.3(4) . . . . ?
C6 C7 C23 C22 -36.0(5) . . . . ?
C8 C7 C23 C22 -156.4(3) . . . . ?
O1 C7 C23 C31 -42.5(4) . . . . ?
C6 C7 C23 C31 -160.8(4) . . . . ?
C8 C7 C23 C31 78.8(4) . . . . ?
O1 C7 C23 C10 -160.5(3) . . . . ?
C6 C7 C23 C10 81.2(4) . . . . ?
C8 C7 C23 C10 -39.1(4) . . . . ?
O1 Si1 C27 C30 176.2(3) . . . . ?
C26 Si1 C27 C30 54.7(4) . . . . ?
C25 Si1 C27 C30 -62.7(4) . . . . ?
O1 Si1 C27 C29 -63.3(3) . . . . ?
C26 Si1 C27 C29 175.3(3) . . . . ?
C25 Si1 C27 C29 57.8(4) . . . . ?
O1 Si1 C27 C28 55.9(3) . . . . ?
C26 Si1 C27 C28 -65.6(3) . . . . ?
C25 Si1 C27 C28 177.0(3) . . . . ?
 
_refine_diff_density_max    0.199
_refine_diff_density_min   -0.247
_refine_diff_density_rms    0.047

_shelx_res_file
;

    sad_a.res created by SHELXL-2014/7


TITL sad_a.res in P2(1)2(1)2(1)
CELL  1.54178   7.3883  10.3271  37.3224   90.000   90.000   90.000
ZERR   4.000   0.0003   0.0004   0.0012    0.000    0.000    0.000
LATT -1
SYMM 1/2-X, -Y, 1/2+Z
SYMM -X, 1/2+Y, 1/2-Z
SYMM 1/2+X, 1/2-Y, -Z
SFAC C  H  N  O  Si
UNIT 124 204 4 4 4
L.S. 10
BOND $H
FMAP 2
PLAN 20
SIZE 0.24 0.14 0.08
TEMP -173
CONF
HTAB
ACTA
WGHT    0.047200
FVAR       0.39286
SI1   5    0.173237    0.771817    0.646741    11.00000    0.01747    0.02184 =
         0.02365   -0.00088   -0.00052    0.00075
O1    4    0.216402    0.619093    0.638665    11.00000    0.01989    0.01927 =
         0.02505   -0.00078    0.00003   -0.00248
N1    3    0.903091    0.171310    0.702519    11.00000    0.05863    0.04666 =
         0.06231    0.00803    0.01179    0.01626
C1    1    0.755575    0.201227    0.707416    11.00000    0.05709    0.03386 =
         0.03103    0.00328    0.00441    0.00657
C2    1    0.570554    0.234824    0.714154    11.00000    0.04361    0.03647 =
         0.03291    0.00296   -0.00141   -0.00372
AFIX  43
H2    2    0.481608    0.170415    0.709656    11.00000   -1.20000
AFIX   0
C3    1    0.513207    0.348893    0.726199    11.00000    0.03759    0.03826 =
         0.01853    0.00768   -0.00196   -0.00036
C4    1    0.316773    0.373858    0.732846    11.00000    0.03164    0.04576 =
         0.02357    0.00808   -0.00160   -0.00414
AFIX  23
H4A   2    0.301936    0.407575    0.757503    11.00000   -1.20000
H4B   2    0.250320    0.290799    0.731308    11.00000   -1.20000
AFIX   0
C5    1    0.230807    0.471472    0.706167    11.00000    0.03366    0.04013 =
         0.02424   -0.00103   -0.00290    0.00637
AFIX  23
H5A   2    0.107634    0.494373    0.714468    11.00000   -1.20000
H5B   2    0.304110    0.551704    0.705719    11.00000   -1.20000
AFIX   0
C6    1    0.219771    0.415654    0.668451    11.00000    0.02576    0.02921 =
         0.02199    0.00180   -0.00342    0.00170
AFIX  23
H6A   2    0.159650    0.330119    0.669798    11.00000   -1.20000
H6B   2    0.344504    0.401143    0.659631    11.00000   -1.20000
AFIX   0
C7    1    0.118161    0.499175    0.640726    11.00000    0.02552    0.02380 =
         0.01601    0.00192   -0.00031   -0.00176
C8    1   -0.085460    0.516935    0.650880    11.00000    0.02326    0.02686 =
         0.02163   -0.00106    0.00023    0.00172
AFIX  23
H8A   2   -0.104383    0.496943    0.676550    11.00000   -1.20000
H8B   2   -0.123862    0.607375    0.646454    11.00000   -1.20000
AFIX   0
C9    1   -0.195471    0.423375    0.627386    11.00000    0.01818    0.02488 =
         0.02719    0.00052    0.00156    0.00117
AFIX  23
H9A   2   -0.276528    0.369161    0.642256    11.00000   -1.20000
H9B   2   -0.269394    0.471549    0.609729    11.00000   -1.20000
AFIX   0
C10   1   -0.053504    0.340270    0.608578    11.00000    0.01598    0.02163 =
         0.02060    0.00124    0.00122    0.00056
AFIX  13
H10   2   -0.013072    0.274041    0.626410    11.00000   -1.20000
AFIX   0
C11   1   -0.108145    0.266091    0.574904    11.00000    0.01461    0.01864 =
         0.02079    0.00306    0.00119    0.00036
AFIX  13
H11   2   -0.143998    0.330192    0.556118    11.00000   -1.20000
AFIX   0
C12   1   -0.265690    0.175397    0.581209    11.00000    0.01720    0.02160 =
         0.02230   -0.00196    0.00133    0.00332
AFIX  23
H12A  2   -0.371085    0.225437    0.589961    11.00000   -1.20000
H12B  2   -0.232734    0.111408    0.599852    11.00000   -1.20000
AFIX   0
C13   1   -0.316900    0.104442    0.546651    11.00000    0.01638    0.02198 =
         0.02846    0.00307   -0.00005   -0.00452
AFIX  23
H13A  2   -0.413702    0.040950    0.551920    11.00000   -1.20000
H13B  2   -0.365318    0.167721    0.529182    11.00000   -1.20000
AFIX   0
C14   1   -0.158916    0.035327    0.530323    11.00000    0.01680    0.02269 =
         0.02084    0.00381   -0.00525   -0.00158
C15   1   -0.172421   -0.086793    0.519528    11.00000    0.02232    0.02349 =
         0.02578    0.00297    0.00330   -0.00418
AFIX  43
H15   2   -0.282142   -0.131404    0.524402    11.00000   -1.20000
AFIX   0
C16   1   -0.025908   -0.159059    0.500139    11.00000    0.02848    0.02641 =
         0.02787   -0.00480    0.00281   -0.00016
AFIX  23
H16A  2   -0.079873   -0.210525    0.480475    11.00000   -1.20000
H16B  2    0.034359   -0.219601    0.516892    11.00000   -1.20000
AFIX   0
C17   1    0.113290   -0.065606    0.484812    11.00000    0.02415    0.02499 =
         0.02659   -0.00477    0.00192    0.00365
AFIX  23
H17A  2    0.060598   -0.018948    0.464120    11.00000   -1.20000
H17B  2    0.220179   -0.114535    0.476292    11.00000   -1.20000
AFIX   0
C18   1    0.171260    0.031469    0.513396    11.00000    0.01644    0.02434 =
         0.02296   -0.00050    0.00196   -0.00177
AFIX  23
H18A  2    0.267012    0.088208    0.503505    11.00000   -1.20000
H18B  2    0.222932   -0.015869    0.534070    11.00000   -1.20000
AFIX   0
C19   1    0.012353    0.115426    0.526303    11.00000    0.01496    0.02109 =
         0.02230    0.00101    0.00190    0.00086
AFIX  13
H19   2   -0.011272    0.181614    0.507313    11.00000   -1.20000
AFIX   0
C20   1    0.056959    0.189063    0.561046    11.00000    0.01664    0.01903 =
         0.02192    0.00000    0.00034    0.00046
AFIX  13
H20   2    0.085917    0.122477    0.579635    11.00000   -1.20000
AFIX   0
C21   1    0.225606    0.274884    0.557044    11.00000    0.01574    0.02346 =
         0.02191    0.00013    0.00303    0.00052
AFIX  23
H21A  2    0.206618    0.335503    0.536841    11.00000   -1.20000
H21B  2    0.330620    0.219431    0.551043    11.00000   -1.20000
AFIX   0
C22   1    0.269829    0.353114    0.590866    11.00000    0.01451    0.02289 =
         0.02336   -0.00181   -0.00029   -0.00300
AFIX  23
H22A  2    0.306283    0.293223    0.610280    11.00000   -1.20000
H22B  2    0.372997    0.411594    0.585899    11.00000   -1.20000
AFIX   0
C23   1    0.106836    0.433401    0.603233    11.00000    0.01578    0.01941 =
         0.01879   -0.00158    0.00119    0.00054
C24   1    0.641494    0.457014    0.734633    11.00000    0.03335    0.03402 =
         0.03925    0.00806    0.00075   -0.00153
AFIX 137
H24A  2    0.765849    0.428735    0.729918    11.00000   -1.50000
H24B  2    0.629459    0.480992    0.759926    11.00000   -1.50000
H24C  2    0.613096    0.532044    0.719571    11.00000   -1.50000
AFIX   0
C25   1    0.082066    0.799715    0.692808    11.00000    0.02332    0.02579 =
         0.03653   -0.00277    0.00409    0.00031
AFIX 137
H25A  2   -0.030168    0.750393    0.695905    11.00000   -1.50000
H25B  2    0.057265    0.892169    0.696112    11.00000   -1.50000
H25C  2    0.171293    0.771211    0.710564    11.00000   -1.50000
AFIX   0
C26   1    0.010004    0.846451    0.615039    11.00000    0.02425    0.02370 =
         0.03264    0.00359   -0.00525    0.00026
AFIX 137
H26A  2    0.061841    0.846601    0.590869    11.00000   -1.50000
H26B  2   -0.015217    0.935660    0.622470    11.00000   -1.50000
H26C  2   -0.102756    0.796477    0.615046    11.00000   -1.50000
AFIX   0
C27   1    0.400841    0.851199    0.640755    11.00000    0.02006    0.02555 =
         0.02368   -0.00083   -0.00296   -0.00707
C28   1    0.476547    0.820287    0.603214    11.00000    0.02583    0.03759 =
         0.02942   -0.00042    0.00022   -0.00256
AFIX 137
H28A  2    0.390502    0.849505    0.584939    11.00000   -1.50000
H28B  2    0.494940    0.726669    0.600937    11.00000   -1.50000
H28C  2    0.592313    0.865042    0.599908    11.00000   -1.50000
AFIX   0
C29   1    0.534342    0.799148    0.668867    11.00000    0.02127    0.04523 =
         0.02547   -0.00160   -0.00396   -0.00408
AFIX 137
H29A  2    0.651667    0.842143    0.665950    11.00000   -1.50000
H29B  2    0.549301    0.705581    0.665641    11.00000   -1.50000
H29C  2    0.487174    0.816534    0.692932    11.00000   -1.50000
AFIX   0
C30   1    0.383952    0.998144    0.644867    11.00000    0.03505    0.03145 =
         0.04859   -0.00904   -0.00001   -0.01206
AFIX 137
H30A  2    0.321729    1.018153    0.667385    11.00000   -1.50000
H30B  2    0.314398    1.033309    0.624737    11.00000   -1.50000
H30C  2    0.504915    1.037070    0.645111    11.00000   -1.50000
AFIX   0
C31   1    0.065118    0.537856    0.575111    11.00000    0.02045    0.02254 =
         0.02245    0.00109    0.00044   -0.00179
AFIX 137
H31A  2    0.172278    0.592278    0.571546    11.00000   -1.50000
H31B  2   -0.035825    0.591557    0.583439    11.00000   -1.50000
H31C  2    0.032290    0.496362    0.552408    11.00000   -1.50000
AFIX   0
HKLF 4

REM  sad_a.res in P2(1)2(1)2(1)
REM R1 =  0.0510 for    3824 Fo > 4sig(Fo)  and  0.0786 for all    4987 data
REM    314 parameters refined using      0 restraints

END

WGHT      0.0421      0.0000

REM No hydrogen bonds found for HTAB generation

REM Highest difference peak  0.199,  deepest hole -0.247,  1-sigma level  0.047
Q1    1   0.3042  0.8195  0.6463  11.00000  0.05    0.20
Q2    1   0.8072  0.0831  0.6811  11.00000  0.05    0.19
Q3    1   0.3994  0.5382  0.6714  11.00000  0.05    0.17
Q4    1   0.1012  0.7145  0.6107  11.00000  0.05    0.17
Q5    1   0.5155  0.7552  0.6941  11.00000  0.05    0.17
Q6    1   0.0580  0.8034  0.6309  11.00000  0.05    0.16
Q7    1   0.2027  0.3969  0.5934  11.00000  0.05    0.16
Q8    1   0.4741  0.5876  0.6140  11.00000  0.05    0.16
Q9    1  -0.0043  0.4144  0.6806  11.00000  0.05    0.16
Q10   1   0.0772  0.4660  0.5912  11.00000  0.05    0.16
Q11   1   0.1047  0.5993  0.6795  11.00000  0.05    0.16
Q12   1   0.4203  0.9421  0.7027  11.00000  0.05    0.16
Q13   1   0.4698  0.1089  0.7343  11.00000  0.05    0.16
Q14   1   0.6673  0.7696  0.6799  11.00000  0.05    0.15
Q15   1   0.6794  0.3876  0.7140  11.00000  0.05    0.15
Q16   1   0.1828  1.0587  0.6163  11.00000  0.05    0.15
Q17   1   0.0959  0.0785  0.5213  11.00000  0.05    0.15
Q18   1  -0.1706  0.3731  0.5524  11.00000  0.05    0.15
Q19   1   0.2209  0.1429  0.6032  11.00000  0.05    0.15
Q20   1  -0.1290 -0.3476  0.4598  11.00000  0.05    0.15
;
_shelx_res_checksum   12015

_shelx_hkl_file
;
  -1   0   0   -4.30    5.80
  -1   0   0    4.70    5.90
   1   0   0    1.10    5.60
   1   0   0   -5.40    6.00
   2   0   0   73.39    7.80
   3   0   0   -4.70    5.20
   4   0   0   11.00    5.80
   5   0   0   -5.10    5.50
  -6   0   0   16.50    8.30
   6   0   0    9.70    7.60
  -7   0   0    3.00    8.20
   7   0   0    5.60    7.40
  -8   0   0    7.20    7.60
   8   0   0   10.60    6.00
   8  -1   0    1.70    6.00
  -8   1   0   12.20    7.50
   7  -1   0    5.30    7.40
  -7   1   0    9.60   10.20
  -7   1   0   -1.20    8.20
   5  -1   0   13.40    5.80
   4  -1   0  173.98   11.80
   3  -1   0  835.02   29.20
   2  -1   0  426.66   16.30
   1  -1   0  789.82   25.70
   0  -1   0    1.90    4.50
   0   1   0   -2.10    4.20
  -1  -1   0  893.11   31.70
   1   1   0  814.02   30.90
  -2  -1   0  416.76   23.50
   2   1   0  384.76   20.90
   2   1   0  363.46   22.40
   3   1   0  759.92   26.80
   4   1   0  180.58   12.00
   5   1   0   12.10    6.60
  -6  -1   0    5.90    7.50
  -6  -1   0   -7.90    6.80
   6   1   0   -0.90    7.40
  -7  -1   0   11.40    7.80
  -8  -1   0    1.30    7.50
   8  -2   0   14.10    6.70
  -8   2   0   23.00    9.70
   7  -2   0   -0.10    7.20
  -7   2   0    3.60   10.20
  -7   2   0    4.40    7.80
  -6   2   0    9.40    8.80
   5  -2   0    4.00    5.60
   4  -2   0  403.46   18.00
   3  -2   0   65.99    8.50
   2  -2   0  425.36   16.40
   1  -2   0   49.70    6.20
   0  -2   0  114.39    6.70
  -1  -2   0   59.29   15.10
   1   2   0   53.49   14.30
  -2  -2   0  332.77   16.90
   4   2   0  408.56   18.10
  -5  -2   0    7.40    6.70
   5   2   0    7.90    6.70
  -6  -2   0    8.60    7.20
  -6  -2   0   -2.20    7.20
  -7  -2   0    8.60    8.50
  -7  -2   0    6.40    7.90
  -8  -2   0   12.60    7.70
   8  -3   0   39.10    7.30
  -8   3   0   32.10    9.90
   7  -3   0   33.80    8.70
  -7   3   0   51.49   10.30
  -7   3   0   32.50   11.80
  -6   3   0   24.40   14.70
  -6   3   0   25.70   10.20
   5  -3   0    1.40    5.70
   4  -3   0   35.80    6.70
   3  -3   0  766.52   28.30
   2  -3   0  296.97   12.70
   2  -3   0  326.97   14.10
   1  -3   0  696.23   24.40
   0  -3   0   -3.60    4.30
  -1  -3   0  656.03   23.70
  -1  -3   0  671.13   23.10
  -2  -3   0  276.97   14.00
  -3  -3   0  657.43   25.70
  -5  -3   0   -5.70    6.00
  -6  -3   0   20.30    8.40
  -6  -3   0   25.60    8.70
  -7  -3   0   30.10    9.60
  -7  -3   0   35.10    9.20
  -8  -3   0   22.80    8.00
  -8  -3   0   12.10    6.50
   8  -4   0    2.10    5.70
   7  -4   0    8.20    7.80
  -7   4   0   11.20    9.50
  -7   4   0   14.80   11.80
   6  -4   0   -3.30    7.70
  -6   4   0    9.30   13.90
  -6   4   0   -4.80    9.00
   4  -4   0  581.94   24.80
   3  -4   0   19.60    6.40
   2  -4   0    2.80    5.50
   2  -4   0   -3.00    4.80
   1  -4   0   -5.30    4.80
   1  -4   0   -0.10    5.50
   0  -4   0   12.90    5.10
   0  -4   0    4.90    5.70
  -1  -4   0   -3.70    5.70
  -2  -4   0   -6.40    6.00
  -3  -4   0   16.10    7.30
  -5  -4   0    7.40    7.60
  -6  -4   0   10.70    8.40
  -6  -4   0   14.20    8.10
  -7  -4   0   16.00    9.00
  -7  -4   0    4.00    8.30
  -8  -4   0    2.70    7.20
   8  -5   0   39.70    8.60
   7  -5   0   72.69    9.00
  -7   5   0   83.39   11.50
  -7   5   0   56.39   13.30
   6  -5   0    4.40    8.00
  -6   5   0    3.40    9.40
  -6   5   0   14.90   12.80
   5  -5   0   75.39    9.20
  -5   5   0   94.19   13.30
   4  -5   0    9.20    7.30
  -4   5   0    9.60    6.00
   3  -5   0   36.00    7.40
   2  -5   0    9.20    6.80
   2  -5   0   12.90    5.90
   1  -5   0  271.67   14.80
   1  -5   0  255.87   13.80
   0  -5   0    2.40    6.30
   0  -5   0    3.60    5.80
  -1  -5   0  235.68   13.80
  -2  -5   0   15.40    7.20
  -3  -5   0   29.60    8.80
  -4  -5   0   -8.60    6.60
  -5  -5   0   70.69   10.80
  -5  -5   0   85.69   12.50
  -6  -5   0    4.10    8.20
  -6  -5   0   11.20    9.10
  -7  -5   0   47.00    9.30
  -7  -5   0   43.40    9.90
  -8  -5   0   43.10    7.80
   7  -6   0   19.10    6.30
  -7   6   0    8.50   10.70
  -7   6   0   23.20    9.00
   6  -6   0   79.59    9.40
  -6   6   0   74.39   13.10
  -6   6   0   49.99   13.80
   5  -6   0   13.90    7.40
  -5   6   0   13.80   10.50
  -5   6   0    5.80   12.10
   4  -6   0   55.29    8.30
  -4   6   0   51.19    8.10
   3  -6   0  170.98   15.10
   2  -6   0  491.15   26.50
   2  -6   0  536.65   23.60
   1  -6   0   49.40    8.30
   1  -6   0   48.80    8.30
   0  -6   0  121.59   12.80
  -1  -6   0   31.70    7.90
  -2  -6   0  563.14   25.30
  -3  -6   0  167.68   16.00
  -3  -6   0  144.49   13.90
  -4  -6   0   19.00    8.70
  -4  -6   0   44.00    9.10
  -5  -6   0   16.80    8.80
  -5  -6   0   19.80    9.40
  -6  -6   0   65.59   11.20
  -6  -6   0   71.79   11.90
  -7  -6   0   14.00    8.40
  -7  -6   0   10.30    7.80
  -7   7   0   14.00    7.50
   6  -7   0    5.40    6.70
  -6   7   0   19.00   12.30
  -6   7   0   14.60   11.70
   5  -7   0   74.09    9.60
  -5   7   0   52.29   13.60
  -5   7   0   75.29   14.20
   4  -7   0   87.69   11.50
   4  -7   0   84.09   13.20
  -4   7   0   66.39   10.20
   3  -7   0   32.00    9.50
   3  -7   0   34.50    7.90
  -3   7   0   23.00    8.40
   2  -7   0   40.70    9.60
   1  -7   0   39.10    9.90
   0  -7   0    1.40    8.40
  -1  -7   0   37.00    9.70
  -2  -7   0   53.59   11.40
  -3  -7   0   33.10   11.10
  -3  -7   0   17.00    9.30
  -3  -7   0   20.50    9.50
  -3  -7   0   18.60    7.80
  -4  -7   0   72.99    9.60
  -4  -7   0   58.69   10.90
  -4  -7   0   69.39   11.80
  -5  -7   0   44.90   11.30
  -5  -7   0   67.29   11.60
  -6  -7   0  -21.70    7.70
  -6  -7   0    1.40    6.60
  -7  -7   0   12.00    7.40
   6  -8   0   29.20    6.90
  -6   8   0   12.20   11.50
   5  -8   0    9.30    7.80
  -5   8   0  -25.20   12.30
   4  -8   0    7.40    7.90
   4  -8   0    0.60    9.00
  -4   8   0   22.00    8.70
  -4   8   0   10.40   13.40
   3  -8   0  449.26   32.60
   3  -8   0  521.75   23.40
   3  -8   0  536.75   26.60
  -3   8   0  566.74   24.90
   2  -8   0   28.70   10.30
   2  -8   0   25.80   11.00
   2  -8   0   32.40    7.70
   1  -8   0  220.98   17.00
   1  -8   0  201.28   20.10
   0  -8   0    7.60   10.40
  -1  -8   0  193.08   16.40
  -1  -8   0  222.88   21.30
  -2  -8   0   28.40    8.30
  -2  -8   0   25.60   12.20
  -2  -8   0   27.40   10.80
  -3  -8   0  423.56   21.30
  -3  -8   0  429.36   24.40
  -3  -8   0  416.16   24.10
  -3  -8   0  468.35   27.70
  -4  -8   0    3.20    9.10
  -4  -8   0   14.80    7.90
  -5  -8   0   -8.90    8.50
  -6  -8   0   27.10    8.20
   6  -9   0    6.40    5.30
  -6   9   0   19.00    9.70
   5  -9   0   21.30    7.50
  -5   9   0   14.10   15.90
   4  -9   0   21.00    7.30
   4  -9   0   31.10    8.20
  -4   9   0   48.80   18.00
   3  -9   0    3.00    7.10
   3  -9   0   19.10   15.70
   3  -9   0   13.80   10.00
  -3   9   0    5.00    8.60
   2  -9   0    1.70    9.60
   2  -9   0    6.50   10.20
   2  -9   0  -11.20   11.40
   2  -9   0    1.00   11.80
  -2   9   0    1.20    8.50
   1  -9   0   -8.50   11.40
   1  -9   0   -1.90    9.00
   1  -9   0   12.00   11.70
   1  -9   0   -0.40   10.60
  -1   9   0    2.00    8.50
   0  -9   0   -0.70    9.90
   0  -9   0   -4.10    8.20
   0  -9   0    9.90   12.00
   0  -9   0    9.80   11.20
   0  -9   0   -1.00    8.50
   0   9   0  -19.60    9.20
  -1  -9   0   26.60   14.20
  -1  -9   0    4.60   10.40
  -1  -9   0   -7.00    9.90
  -1  -9   0    9.10    8.30
  -2  -9   0    0.80    8.40
  -2  -9   0   34.40   10.60
  -2  -9   0   21.40   10.80
  -3  -9   0   18.00    9.90
  -3  -9   0   15.50    9.00
  -4  -9   0   39.00    9.40
  -4  -9   0   41.80   10.50
  -5  -9   0    7.10    7.30
  -5  -9   0   19.00    6.70
  -5  10   0   39.40   14.90
   4 -10   0   -6.40    6.20
   4 -10   0   -5.70    4.70
  -4  10   0    6.40   20.60
   3 -10   0   -4.30   15.40
   3 -10   0   -2.20    6.10
   3 -10   0  -10.50    6.40
   2 -10   0   31.40   15.50
   2 -10   0    6.40   10.10
   1 -10   0    6.10    9.40
   1 -10   0   14.30   12.70
   1 -10   0    0.10   11.00
   0 -10   0    3.60   10.40
   0 -10   0    5.90   11.80
   0 -10   0    8.20    8.40
   0 -10   0    4.50    8.30
  -1 -10   0   -3.90    9.60
  -1 -10   0   17.80   11.40
  -1 -10   0   12.20    8.50
  -2 -10   0   -2.10   10.00
  -2 -10   0   36.60    9.30
  -2 -10   0    2.60    9.20
  -3 -10   0    0.20    8.00
  -3 -10   0   11.20    8.40
  -4 -10   0   -1.20    7.40
  -4 -10   0    5.50    7.10
  -5 -10   0    3.10    6.30
   3 -11   0   -5.30    5.30
  -3  11   0    9.60   11.50
   2 -11   0   -1.50   12.60
   2 -11   0   -3.10    7.80
   1 -11   0   50.19   14.50
   1 -11   0   37.70    9.50
   0 -11   0   -2.40    7.20
   0 -11   0    4.80    6.60
   0 -11   0  -21.90   10.70
   0 -11   0    0.60    7.10
  -1 -11   0   44.90   10.20
  -1 -11   0   56.39    8.70
  -1 -11   0   19.60    9.90
  -2 -11   0   -4.50    6.30
  -2 -11   0  -10.40    7.30
  -3 -11   0   13.20    5.90
  -3 -11   0    2.20    6.40
   1 -12   0  122.39   15.20
   1 -12   0  131.39   10.50
   0 -12   0   16.90    7.10
  -1 -12   0  117.59   10.00
  -1 -12   0  125.49   13.20
  -1 -12   1   34.60    6.70
  -1 -12   1   23.60    6.00
   0 -12   1   99.59   13.70
   0 -12   1  111.29   12.90
   1 -12   1   21.80    8.60
   1 -12   1   23.10    6.90
  -3 -11   1   27.70    6.30
  -3 -11   1   30.50    7.20
  -2 -11   1   15.70    7.90
  -2 -11   1   29.80    7.30
  -2 -11   1   29.90    8.50
  -1 -11   1    6.50    5.80
  -1 -11   1    7.90    7.20
  -1 -11   1    9.10    9.30
   0 -11   1   -7.60    5.80
   0 -11   1   11.70   11.90
   0 -11   1   10.50    7.40
   0 -11   1   14.30    7.80
   1 -11   1   13.80   13.90
   1 -11   1   12.30    8.40
   2 -11   1   18.40   12.60
   2 -11   1   21.00    8.70
  -3  11  -1   44.50   12.80
   3 -11   1   17.10    5.80
  -5 -10   1    6.70    6.10
  -4 -10   1    4.00    7.40
  -4 -10   1    4.90    7.10
  -3 -10   1   14.00    7.80
  -3 -10   1   11.20    8.00
  -2 -10   1   22.10   10.60
  -2 -10   1   27.00    8.90
  -2 -10   1   24.00    9.80
  -1 -10   1    6.20   10.00
  -1 -10   1   16.50    8.30
  -1 -10   1    5.90   10.40
   0 -10   1    6.50   11.30
   0 -10   1   -3.30    7.80
   0 -10   1   16.20   10.50
   0 -10   1    7.70    8.60
   1 -10   1    1.20    9.40
   1 -10   1    5.50   13.90
   1 -10   1   17.80   12.50
   2 -10   1   33.40   15.00
   2 -10   1   37.70   11.10
   3 -10   1   10.50    7.70
   3 -10   1   -6.30   15.20
   3 -10   1    3.60    6.00
  -4  10  -1   34.00   21.20
   4 -10   1    5.10    5.00
   4 -10   1   18.10    6.50
  -5  10  -1   23.80   14.20
   5 -10   1   20.20    5.80
  -5  -9   1    8.80    7.30
  -5  -9   1   -0.60    5.40
  -4  -9   1   19.80    9.90
  -4  -9   1    0.90    8.00
  -3  -9   1   35.10   11.40
  -3  -9   1   31.60    9.30
  -3  -9   1   25.30    9.80
  -2  -9   1   63.89   10.40
  -2  -9   1   74.69   13.00
  -2  -9   1   84.09   12.20
  -1  -9   1   -0.20    8.40
  -1  -9   1   23.60   13.60
  -1  -9   1    5.10   10.20
  -1  -9   1   18.60   11.40
   0  -9   1    6.30   10.00
   0  -9   1  -14.00   10.30
   0  -9   1   11.00    8.70
   0  -9   1   -0.80    8.60
   0  -9   1  -11.90   11.70
  -1   9  -1    0.60    8.20
   1  -9   1    5.60   11.20
   1  -9   1    1.60    9.30
   1  -9   1   -1.80   10.50
  -2   9  -1   90.39   11.30
   2  -9   1   84.19   12.80
   2  -9   1   91.59   12.70
   2  -9   1   55.49   13.50
  -3   9  -1   42.90   10.00
   3  -9   1   34.10   10.90
   3  -9   1   42.10   15.60
   3  -9   1   50.19    8.30
  -4   9  -1   -4.90   16.10
   4  -9   1    8.20    7.40
   4  -9   1   -3.10    6.10
  -5   9  -1   32.00   16.00
   5  -9   1    6.00    6.80
  -6   9  -1   19.00    9.50
  -6  -8   1   15.10    7.20
  -5  -8   1   17.80    9.10
  -5  -8   1    6.30    7.90
  -4  -8   1   76.59   12.20
  -4  -8   1   85.49   12.70
  -3  -8   1   25.60   12.60
  -3  -8   1   19.70    7.70
  -3  -8   1   18.50    8.40
  -3  -8   1   29.70   10.60
  -2  -8   1   40.40   12.70
  -2  -8   1   34.60    8.10
  -2  -8   1   21.90   10.20
  -1  -8   1   -4.30   11.00
  -1  -8   1   29.00    8.70
   0  -8   1   16.30   11.00
   1  -8   1    0.70   10.40
   1  -8   1  -11.70    8.80
  -2   8  -1   27.60    8.80
   2  -8   1   27.90    7.60
   2  -8   1   46.80   10.80
  -3   8  -1   13.50    8.00
   3  -8   1   -3.90    8.90
   3  -8   1   14.40   12.30
   3  -8   1   16.30    7.50
  -4   8  -1  121.99   14.50
   4  -8   1  110.09   14.40
   4  -8   1  103.99   15.70
  -5   8  -1   11.70   13.50
   5  -8   1    9.50    7.70
  -6   8  -1   37.20   11.80
   6  -8   1   38.80    7.10
  -7  -7   1    1.90    7.30
  -6  -7   1    6.30    8.70
  -6  -7   1    5.90    6.40
  -5  -7   1   44.50   10.50
  -5  -7   1   30.00   10.30
  -4  -7   1   38.20   10.20
  -4  -7   1    3.70    7.10
  -4  -7   1   13.80    8.90
  -3  -7   1   81.29    9.60
  -3  -7   1   78.09   11.50
  -3  -7   1   60.19   11.10
  -3  -7   1   46.90   11.40
  -2  -7   1  277.97   19.30
  -2  -7   1  334.17   21.80
  -1  -7   1   26.90    9.40
   0  -7   1    3.30    8.50
   1  -7   1    2.10    9.30
   2  -7   1  361.76   21.00
  -3   7  -1  102.29   12.90
   3  -7   1   95.99   12.10
   3  -7   1   93.19   11.80
  -4   7  -1   26.10    8.60
   4  -7   1    5.50    7.40
  -5   7  -1   65.09   13.40
   5  -7   1   42.10    8.60
  -6   7  -1   22.40   11.90
  -6   7  -1   11.80   11.90
   6  -7   1    5.80    6.60
  -7   7  -1   -2.90    7.10
  -7  -6   1    8.00    8.00
  -7  -6   1   -2.80    7.10
  -6  -6   1   31.50    9.90
  -6  -6   1   32.20   10.20
  -5  -6   1   63.29   10.50
  -5  -6   1   79.79   11.80
  -4  -6   1    8.10    7.60
  -4  -6   1    4.40    8.10
  -3  -6   1   82.19   10.80
  -3  -6   1  132.99   15.50
  -2  -6   1  106.59   11.60
  -1  -6   1   92.89   12.70
   0  -6   1   57.89    8.50
   1  -6   1   50.89    8.40
   1  -6   1   83.49    9.50
   2  -6   1  136.29   13.60
  -3   6  -1  103.09   11.40
   3  -6   1   83.79   11.00
  -4   6  -1   14.20    7.30
   4  -6   1   -0.70    6.70
  -5   6  -1   82.29   15.10
  -5   6  -1   98.89   13.90
   5  -6   1   94.29   13.90
  -6   6  -1   28.90   11.40
  -6   6  -1    5.20   11.70
   6  -6   1   26.20    7.80
  -7   6  -1    5.10    8.30
  -7   6  -1    2.60   10.70
   7  -6   1    2.00    5.90
  -8  -5   1   15.00    7.00
  -7  -5   1   69.19   10.40
  -7  -5   1   53.09    9.60
  -6  -5   1    9.10    8.60
  -6  -5   1   26.80   10.00
  -5  -5   1  157.88   15.50
  -5  -5   1  139.39   13.70
  -4  -5   1   13.40    8.20
  -3  -5   1   81.59   10.30
  -2  -5   1   -2.70    7.10
  -1  -5   1   27.50    7.20
   0  -5   1   26.00    6.70
   0  -5   1   22.30    6.90
   1  -5   1   23.10    7.10
   1  -5   1   27.40    6.80
   2  -5   1    3.70    6.10
   3  -5   1   94.69   11.60
  -4   5  -1    6.90    6.00
   4  -5   1   12.70    7.20
  -5   5  -1  148.99   19.60
   5  -5   1  167.28   13.80
  -6   5  -1   34.00   10.80
  -6   5  -1    8.80   13.10
   6  -5   1   30.90    9.00
  -7   5  -1   52.99   10.50
  -7   5  -1   45.40   13.00
   7  -5   1   56.09    8.90
   8  -5   1   14.80    6.20
  -8  -4   1    3.50    7.20
  -7  -4   1   22.60    9.20
  -7  -4   1    7.50    8.20
  -6  -4   1   54.49   10.40
  -6  -4   1   22.40    8.90
  -5  -4   1    7.50    7.30
  -3  -4   1  409.36   20.20
  -2  -4   1  363.66   17.30
  -1  -4   1  178.48   11.90
   0  -4   1   45.50    6.40
   0  -4   1   47.80    6.60
   1  -4   1  184.68   11.80
   1  -4   1  175.48   10.70
   2  -4   1  403.46   17.30
   2  -4   1  372.96   15.80
   3  -4   1  449.06   19.60
   4  -4   1    5.50    6.30
   5  -4   1    3.80   10.50
  -6   4  -1   71.09   16.20
  -6   4  -1   32.60   10.60
  -7   4  -1   18.50   11.90
  -7   4  -1   15.40    9.60
   7  -4   1    5.00    7.70
  -8   4  -1   19.00    9.20
   8  -4   1   15.60    6.10
  -8  -3   1   10.20    6.20
  -8  -3   1   27.80    8.00
  -7  -3   1   10.60    8.10
  -7  -3   1   -4.50    8.00
  -6  -3   1  165.78   15.60
  -6  -3   1  134.09   14.80
   5   3  -1   39.40    8.40
  -5  -3   1   12.10    7.30
  -2  -3   1  382.66   17.00
  -1  -3   1  479.15   18.80
  -1  -3   1  493.25   18.00
   0  -3   1   46.40    7.00
   1  -3   1  529.05   19.30
   2  -3   1  446.06   17.80
   3  -3   1  242.88   13.10
   4  -3   1    6.40    5.60
   5  -3   1   29.60    7.10
  -6   3  -1  143.99   18.80
  -6   3  -1  167.58   25.00
  -7   3  -1    2.80   11.20
  -7   3  -1   12.00   10.70
   7  -3   1    2.00    7.50
  -8   3  -1   27.70   10.00
   8  -3   1   28.00    6.90
  -8  -2   1   12.20    8.00
  -7  -2   1   95.29   14.30
  -7  -2   1  113.19   14.40
  -6  -2   1   51.49    9.60
  -6  -2   1   46.30    9.00
   5   2  -1   20.40    7.80
  -5  -2   1    9.60    7.00
   4   2  -1  180.68   13.20
  -2  -2   1   52.49    6.90
   1   2  -1  281.67   19.90
  -1  -2   1  299.87   20.80
   0  -2   1 1789.02   56.29
   1  -2   1  260.77   11.00
   2  -2   1   55.29    7.30
   3  -2   1  243.28   12.30
   4  -2   1  155.38   11.20
   5  -2   1    5.80    5.50
  -7   2  -1  104.19   14.80
  -7   2  -1  105.49   15.50
   7  -2   1  105.99   12.20
  -8   2  -1    4.50    9.10
   8  -2   1   15.80    6.60
  -8  -1   1   13.70    7.90
   7   1  -1  104.99   13.00
  -7  -1   1  107.49   14.10
  -7  -1   1  105.39   13.60
   6   1  -1  144.39   12.70
  -6  -1   1  151.98   14.30
  -6  -1   1  136.69   14.50
   5   1  -1   57.39    8.60
   4   1  -1   22.60    6.60
   2   1  -1  788.22   33.00
   2   1  -1  751.52   34.00
  -2  -1   1  820.52   34.80
   1   1  -1 1068.59   39.20
  -1  -1   1 1146.29   39.90
   0   1  -1  238.08   12.70
   0  -1   1  239.18   12.80
   1  -1   1  940.01   30.10
   2  -1   1  810.32   27.50
   3  -1   1  196.18   10.90
   4  -1   1   12.60    5.60
   5  -1   1   55.49    7.20
  -7   1  -1   86.79   13.30
  -7   1  -1   98.49   16.40
   7  -1   1   96.99   11.90
   8  -1   1   15.50    6.50
   8   0  -1    3.50    5.70
  -8   0   1    8.20    7.80
   7   0  -1   75.99    9.30
  -7   0   1   48.80   10.30
   6   0  -1   81.09   11.40
  -6   0   1   36.90    9.90
  -6   0   1   55.89    9.90
   5   0  -1    0.70    5.90
   4   0  -1   70.29    9.50
   3   0  -1  355.96   15.90
   2   0  -1  270.37   11.80
   1   0  -1  245.98   15.60
   1   0  -1  267.57   15.10
  -1   0   1  274.87   15.90
   0   0   1   -0.10    0.90
  -1   0  -1  267.07   13.80
  -1   0  -1  250.57   14.00
   1   0   1  229.98   13.60
   1   0   1  256.97   13.20
   2   0   1  252.67   11.10
   3   0   1  298.77   13.70
   4   0   1   67.49    9.10
   5   0   1    5.50    5.60
  -6   0  -1   64.19   10.40
  -7   0  -1   72.29   10.70
   7   0   1   71.59    9.40
  -8   0  -1   -5.30    7.20
   8   0   1    5.50    5.90
   8  -1  -1   23.70    6.40
  -8   1   1    6.70    7.10
   7  -1  -1   93.69   12.20
  -7   1   1  121.29   15.30
  -7   1   1  104.29   14.00
   6  -1  -1  152.08   12.50
   5  -1  -1   53.79    8.00
   4  -1  -1   21.90    5.90
   3  -1  -1  208.68   12.30
   2  -1  -1  838.22   28.50
   1  -1  -1 1052.79   33.80
   0  -1  -1  219.58   11.80
   0   1   1  228.88   12.10
  -1  -1  -1 1159.78   38.70
   1   1   1 1069.19   38.00
  -2  -1  -1  853.11   33.80
   2   1   1  750.02   32.60
   2   1   1  780.72   31.40
   3   1   1  165.48   10.20
   4   1   1   14.80    5.90
   5   1   1   62.99    7.80
  -6  -1  -1  145.99   14.50
  -6  -1  -1  149.88   14.40
  -7  -1  -1  103.79   13.90
  -8  -1  -1   19.50    8.20
   8  -2  -1   17.80    6.50
  -8   2   1    8.30    7.20
  -8   2   1   11.50    9.20
   7  -2  -1  105.39   12.50
  -7   2   1   97.59   12.50
  -7   2   1  120.29   16.80
  -7   2   1   97.19   15.40
  -6   2   1   55.29   10.90
   5  -2  -1   12.80    6.20
   4  -2  -1  153.98   11.20
   3  -2  -1  307.47   14.60
   2  -2  -1   57.49    7.60
   1  -2  -1  265.07   11.10
   0  -2  -1 1834.42   63.79
   0   2   1 1834.72   63.29
  -1  -2  -1  264.67   18.40
   1   2   1  278.07   18.20
  -2  -2  -1   63.19   15.60
   2   2   1   56.59   14.40
   3   2   1  228.38   19.70
   4   2   1  153.78   11.60
  -5  -2  -1   15.40    7.20
   5   2   1    4.00    6.40
  -6  -2  -1   51.49    9.20
  -6  -2  -1   47.50    8.80
  -7  -2  -1  103.09   14.40
  -7  -2  -1   95.59   14.20
  -8  -2  -1    9.50    7.20
   8  -3  -1   38.80    7.10
   7  -3  -1    1.00    7.70
  -7   3   1    4.90   10.70
  -7   3   1    0.60    8.80
   6  -3  -1  157.88   14.00
  -6   3   1  174.58   19.30
  -6   3   1  188.58   23.60
   5  -3  -1   27.50    7.40
   4  -3  -1    7.90    5.90
   3  -3  -1  272.57   14.00
   2  -3  -1  421.86   16.20
   2  -3  -1  449.26   17.70
   1  -3  -1  490.35   18.20
   0  -3  -1   45.00    6.70
  -1  -3  -1  456.45   18.10
  -1  -3  -1  488.95   17.60
  -2  -3  -1  363.56   16.20
  -3  -3  -1  232.68   14.40
  -5  -3  -1   20.90    7.40
  -6  -3  -1  162.78   15.10
  -6  -3  -1  148.39   15.70
  -7  -3  -1    3.90    8.20
  -7  -3  -1   -3.50    8.00
  -8  -3  -1   31.80    7.90
   8  -4  -1   17.20    5.90
   7  -4  -1   14.50    8.20
  -7   4   1    8.30   12.20
  -7   4   1    8.80    9.60
   6  -4  -1   57.79    9.60
  -6   4   1   71.69   15.60
  -6   4   1   44.90   10.90
   4  -4  -1    8.10    6.20
   3  -4  -1  436.66   19.30
   2  -4  -1  407.66   17.50
   2  -4  -1  399.66   16.40
   1  -4  -1  187.28   11.00
   1  -4  -1  184.78   11.20
   0  -4  -1   43.30    6.00
   0  -4  -1   42.50    6.10
  -1  -4  -1  173.78   11.10
  -2  -4  -1  334.17   15.80
  -3  -4  -1  439.56   20.40
  -5  -4  -1   10.60    7.90
  -6  -4  -1   48.80    9.70
  -6  -4  -1   46.90   10.20
  -7  -4  -1    8.10    8.20
  -7  -4  -1   29.20    8.80
  -8  -4  -1   17.30    7.70
   7  -5  -1   52.99    8.30
  -7   5   1   51.09   12.80
  -7   5   1   59.49   10.80
   6  -5  -1   23.90    8.40
  -6   5   1   20.20   10.70
  -6   5   1   40.30   13.10
   5  -5  -1  162.08   13.90
  -5   5   1  161.28   19.90
   4  -5  -1   10.70    7.00
  -4   5   1   -7.60    5.90
   3  -5  -1   95.09   11.20
   2  -5  -1    7.00    6.20
   2  -5  -1   14.70    5.90
   1  -5  -1   39.50    7.20
   1  -5  -1   28.80    6.80
   0  -5  -1   17.30    6.70
  -1  -5  -1   35.00    7.00
  -2  -5  -1    5.10    6.80
  -3  -5  -1   81.09   10.10
  -4  -5  -1   20.20    7.80
  -5  -5  -1  115.49   15.40
  -5  -5  -1  119.79   13.50
  -6  -5  -1   21.50    9.30
  -6  -5  -1   21.40    9.40
  -7  -5  -1   47.10   10.10
  -7  -5  -1   30.70    8.90
  -8  -5  -1   12.40    6.90
   7  -6  -1    9.50    6.20
  -7   6   1    3.10    8.70
   6  -6  -1   28.20    7.60
  -6   6   1   16.90   11.00
  -6   6   1   29.60   12.60
   5  -6  -1  106.79   13.40
  -5   6   1   67.29   13.80
  -5   6   1   95.99   14.20
   4  -6  -1    7.30    6.90
  -4   6   1   -3.00    6.70
   3  -6  -1   89.29   13.00
   2  -6  -1  110.29   12.40
   2  -6  -1  122.49   12.90
   1  -6  -1   56.19    9.00
   1  -6  -1   62.19    8.80
   0  -6  -1   54.89    8.70
  -1  -6  -1   67.49    8.90
  -2  -6  -1  118.89   14.70
  -3  -6  -1   80.49   10.70
  -3  -6  -1   87.29   11.20
  -4  -6  -1    8.20    8.40
  -4  -6  -1   28.70    8.50
  -5  -6  -1   90.79   13.80
  -5  -6  -1  103.99   13.10
  -6  -6  -1   18.60    9.40
  -6  -6  -1   17.40    9.40
  -7  -6  -1   13.90    8.30
  -7  -6  -1   -0.20    6.90
  -7   7   1   -8.20    7.10
   6  -7  -1    9.00    7.00
  -6   7   1   -1.90   11.70
   5  -7  -1   54.39    9.20
  -5   7   1   29.80   12.50
  -5   7   1   41.60   12.70
   4  -7  -1    7.90    8.90
   4  -7  -1   11.60    7.30
  -4   7   1    0.80    7.60
   3  -7  -1  104.49   14.10
   3  -7  -1  102.29   13.20
   1  -7  -1   23.00    9.40
   0  -7  -1   10.10    8.60
  -1  -7  -1   12.70    8.70
  -2  -7  -1  347.27   21.50
  -3  -7  -1   69.39   11.50
  -3  -7  -1   81.89   12.60
  -3  -7  -1   85.59    9.90
  -3  -7  -1  115.09   15.00
  -4  -7  -1    6.20    9.00
  -4  -7  -1   18.80    9.60
  -4  -7  -1    9.80    7.40
  -5  -7  -1   33.20    9.90
  -5  -7  -1   57.59   11.20
  -6  -7  -1   -0.50    8.40
  -6  -7  -1   11.50    7.60
  -7  -7  -1   -3.60    7.10
   6  -8  -1   30.80    7.00
  -6   8   1   59.39   13.20
   5  -8  -1   22.10    8.20
  -5   8   1   15.30   14.10
   4  -8  -1  110.39   14.80
   4  -8  -1  102.89   14.10
  -4   8   1  103.69   17.40
  -4   8   1  115.89   14.60
   3  -8  -1    6.60   13.10
   3  -8  -1   -5.30    9.50
   3  -8  -1    5.20    7.10
   3  -8  -1   -4.00    9.30
  -3   8   1   -1.40    8.40
   2  -8  -1   31.60   11.20
   2  -8  -1   28.00    7.60
   2  -8  -1   29.10   10.30
   1  -8  -1    6.90    9.40
   1  -8  -1   22.00   10.80
   0  -8  -1    3.40   10.40
  -1  -8  -1   10.00    8.50
  -1  -8  -1   -7.40   10.50
  -2  -8  -1   45.50   11.40
  -2  -8  -1   32.30   12.70
  -2  -8  -1   36.50    8.90
  -3  -8  -1   17.20   11.20
  -3  -8  -1    6.20    9.10
  -3  -8  -1    4.80    7.80
  -4  -8  -1   62.59   11.80
  -4  -8  -1   95.49   10.90
  -5  -8  -1   13.50    9.50
  -6  -8  -1   42.40    9.10
  -6   9   1   24.10   10.30
   5  -9  -1   17.70    7.50
  -5   9   1   34.30   17.00
   4  -9  -1    4.50    7.50
   4  -9  -1    1.80    6.70
  -4   9   1    5.80   17.00
   3  -9  -1   40.60    7.90
   3  -9  -1   16.50   14.60
   3  -9  -1   30.80   11.00
   3  -9  -1   36.00   10.90
  -3   9   1   43.10   10.00
   2  -9  -1   62.99   13.80
   2  -9  -1   69.89   12.10
   2  -9  -1   50.29   11.80
  -2   9   1  126.39   15.70
   1  -9  -1   -2.40   10.70
   1  -9  -1   -2.20   11.20
   1  -9  -1  -12.00   11.20
   1  -9  -1    1.00    9.30
  -1   9   1    8.50    8.50
   0  -9  -1    8.60    8.40
   0  -9  -1    7.60    8.60
   0  -9  -1   -7.50   10.30
   0  -9  -1   -9.00   10.70
   0  -9  -1   11.00   11.90
   0   9   1   10.00    8.50
  -1  -9  -1    5.00   11.00
  -1  -9  -1   -0.60    9.90
  -1  -9  -1   -0.50    8.40
  -1  -9  -1   10.50   13.00
  -2  -9  -1   77.79   10.90
  -2  -9  -1   87.59   12.00
  -2  -9  -1   90.19   13.50
  -3  -9  -1   22.10   11.10
  -3  -9  -1   22.10    9.10
  -4  -9  -1   -2.70    7.80
  -4  -9  -1    8.90    9.60
  -5  -9  -1   13.50    7.20
   5 -10  -1   10.70    5.40
  -5  10   1   10.40   15.50
   4 -10  -1    2.60    5.00
   4 -10  -1    8.70    6.70
  -4  10   1   21.70   21.30
   3 -10  -1   -0.50   15.40
   3 -10  -1    1.50    6.40
   3 -10  -1   12.30    6.90
  -3  10   1   35.80   20.90
   2 -10  -1   41.50   15.20
   2 -10  -1   45.50   11.30
   2 -10  -1   33.40   11.20
   1 -10  -1   -6.20   12.50
   1 -10  -1   39.40   12.30
   1 -10  -1    5.30    9.50
   0 -10  -1   14.20    8.30
   0 -10  -1    2.40   10.20
   0 -10  -1    0.00    8.30
   0 -10  -1   -9.50   10.90
  -1 -10  -1    1.70    8.20
  -1 -10  -1    3.20   10.30
  -1 -10  -1    3.10    9.60
  -2 -10  -1   12.20   10.80
  -2 -10  -1   33.80    9.60
  -2 -10  -1   27.50    9.40
  -3 -10  -1   19.50    8.40
  -3 -10  -1    9.20    8.10
  -4 -10  -1    7.30    6.30
  -4 -10  -1    4.10    7.10
  -5 -10  -1    7.30    4.70
   3 -11  -1   23.40    6.30
   2 -11  -1   12.40   13.20
   2 -11  -1   25.50    8.70
   1 -11  -1    0.40    8.50
   1 -11  -1  -12.70   12.20
   1 -11  -1    5.40    6.30
   0 -11  -1    5.20    7.30
   0 -11  -1   12.50    7.70
   0 -11  -1    3.50   11.00
   0 -11  -1   -5.90    7.40
  -1 -11  -1   -1.60    7.50
  -1 -11  -1   -0.60    8.90
  -1 -11  -1    5.00    9.10
  -2 -11  -1   18.50    8.40
  -2 -11  -1   31.10    7.60
  -3 -11  -1   30.00    7.50
  -3 -11  -1   34.30    6.70
   1 -12  -1   20.10    6.70
   0 -12  -1  103.79   13.50
  -1 -12  -1   14.70    5.80
  -1 -12  -1   13.80    5.50
  -1 -12   2   24.70    6.90
  -1 -12   2   20.40    5.90
   0 -12   2    4.90    7.30
   0 -12   2   13.50    6.20
   1 -12   2   21.70    8.60
   1 -12   2   34.50    7.00
  -3 -11   2   17.90    5.70
  -3 -11   2    7.40    6.50
  -2 -11   2   16.50    8.10
  -2 -11   2   14.50    6.60
  -2 -11   2   27.40    8.00
  -1 -11   2    0.80    7.00
  -1 -11   2   15.40    9.40
  -1 -11   2    4.80    6.40
   0 -11   2    0.40   11.90
   0 -11   2   -1.00    7.80
   1 -11   2   11.50    8.50
   1 -11   2   27.00   14.30
   2 -11   2    4.70   12.10
   2 -11   2    4.20    8.10
  -3  11  -2   16.40   12.30
   3 -11   2   13.60    5.60
  -5 -10   2   -1.90    5.50
  -4 -10   2   34.80    7.80
  -4 -10   2   20.00    7.80
  -3 -10   2   13.90    7.40
  -3 -10   2    5.60    7.80
  -2 -10   2   25.50    9.00
  -2 -10   2   40.60   11.30
  -2 -10   2   29.20    9.70
  -1 -10   2   17.50    8.80
  -1 -10   2   28.30   10.10
  -1 -10   2   16.20   10.70
   0 -10   2   18.60    8.20
   0 -10   2   -0.30   10.70
   0 -10   2    4.70    8.60
   0 -10   2    4.20   10.00
   1 -10   2   27.50   12.30
   1 -10   2   29.80   10.30
   2 -10   2   37.40   11.20
   2 -10   2   28.70   14.80
   3 -10   2   13.40    6.40
   3 -10   2   40.00   16.40
   3 -10   2   11.80    7.70
  -4  10  -2   46.40   20.80
   4 -10   2   12.80    5.30
   4 -10   2   23.20    6.80
  -5  10  -2   -3.30   13.60
   5 -10   2    0.70    5.30
  -5  -9   2   48.70    8.40
  -5  -9   2   37.00    8.80
  -4  -9   2   25.80    8.70
  -4  -9   2   24.70    9.70
  -3  -9   2   -1.20    9.30
  -3  -9   2    9.60    8.80
  -3  -9   2    3.60    9.20
  -2  -9   2   47.50   11.40
  -2  -9   2   58.99   10.00
  -2  -9   2   56.19   12.40
  -1  -9   2   42.00    9.60
  -1  -9   2   65.89   13.30
  -1  -9   2   30.40   11.30
  -1  -9   2   36.10   13.20
   0  -9   2   41.90   13.70
   0  -9   2    7.30    8.10
   0  -9   2   13.30   11.20
   0  -9   2    9.90    8.40
   0  -9   2    5.50   10.30
  -1   9  -2   50.59    9.30
   1  -9   2   24.90   10.50
   1  -9   2   44.70   12.10
  -2   9  -2   47.20   10.10
   2  -9   2   40.10   11.40
   2  -9   2   43.50   12.60
   2  -9   2   48.50    7.90
  -3   9  -2    1.10    8.50
   3  -9   2   -3.50    9.60
   3  -9   2  -14.10   14.60
   3  -9   2    0.10    7.10
  -4   9  -2   56.59   17.20
   4  -9   2   47.10    8.50
   4  -9   2   17.90    6.60
  -5   9  -2   42.20   15.60
   5  -9   2   58.19    8.10
  -6  -8   2    8.10    6.20
  -5  -8   2    3.90    7.90
  -5  -8   2   23.20    7.90
  -5  -8   2   10.80    9.30
  -4  -8   2    6.60    9.50
  -4  -8   2   10.80    7.50
  -4  -8   2    3.80    8.60
  -3  -8   2  122.79   16.60
  -3  -8   2   97.29   15.50
  -3  -8   2  118.99   12.80
  -2  -8   2   46.30   11.40
  -2  -8   2   36.30    8.10
  -2  -8   2   28.40   12.70
  -1  -8   2  165.98   21.50
  -1  -8   2  137.39   13.70
   0   8  -2   27.30    8.00
   0  -8   2    0.80   11.00
   0  -8   2    7.90   10.40
  -1   8  -2  169.28   14.90
   1  -8   2  156.18   15.30
   1  -8   2  135.59   18.70
  -2   8  -2   47.60    9.50
   2  -8   2   34.70    7.60
   2  -8   2   22.10   10.30
  -3   8  -2  148.19   15.30
   3  -8   2  145.59   14.10
   3  -8   2  150.58   16.80
  -4   8  -2   29.20    9.00
   4  -8   2   17.20    9.50
   4  -8   2   30.20    8.20
  -5   8  -2   26.20   13.70
   5  -8   2    3.60    7.60
  -6   8  -2   44.80   11.40
   6  -8   2   32.20    7.10
  -7  -7   2   16.00    7.80
  -6  -7   2   -0.10    5.80
  -6  -7   2   -2.10    8.50
  -5  -7   2   53.59   10.60
  -5  -7   2   42.70   10.30
  -4  -7   2   92.29   12.40
  -4  -7   2   77.39   11.60
  -4  -7   2   71.79   11.40
  -3  -7   2   66.29   11.20
  -3  -7   2   73.49    9.60
  -3  -7   2   52.89   10.80
  -3  -7   2   64.79   12.20
  -2  -7   2   18.30   10.00
  -2  -7   2   47.20    9.90
  -1  -7   2   31.70    9.90
   0  -7   2   43.70   10.20
   1  -7   2   45.40   10.00
   2  -7   2   39.90    9.70
  -3   7  -2   63.69    9.30
   3  -7   2   71.59    8.70
   3  -7   2   78.29   11.60
  -4   7  -2   98.69   13.90
   4  -7   2   81.79    9.70
  -5   7  -2   66.79   13.30
   5  -7   2   78.79    9.70
  -6   7  -2   20.60   11.70
  -6   7  -2    8.80   12.10
   6  -7   2   13.00    6.90
  -7   7  -2    5.00    7.20
  -7  -6   2    4.00    7.70
  -7  -6   2   -0.50    7.20
  -6  -6   2   25.50   10.00
  -6  -6   2    7.10    9.00
  -5  -6   2   32.30    9.90
  -5  -6   2   26.40    8.80
  -4  -6   2  160.08   14.80
  -4  -6   2  162.88   15.70
  -3  -6   2  121.19   13.10
  -3  -6   2  100.89   13.70
  -2  -6   2  200.98   17.70
  -1  -6   2   38.10    8.70
   0  -6   2   19.30    8.00
   1  -6   2   35.70    8.20
   1  -6   2   41.10    8.30
   2  -6   2  200.08   15.50
  -3   6  -2  110.59   12.50
   3  -6   2  107.29   13.60
  -4   6  -2  194.38   14.70
   4  -6   2  187.78   14.50
  -5   6  -2   13.80   10.50
  -5   6  -2   25.70   13.20
   5  -6   2   23.00    7.50
  -6   6  -2   -3.80   11.30
  -6   6  -2    6.00   10.60
   6  -6   2   32.30    8.30
  -7   6  -2   12.30   11.00
  -7   6  -2   -1.00    7.80
   7  -6   2    9.40    6.00
  -8  -5   2    0.10    6.40
  -7  -5   2    7.20    8.30
  -7  -5   2    5.10    7.80
  -6  -5   2   16.40    8.70
  -6  -5   2    4.50    9.30
  -5  -5   2   46.10    9.30
  -5  -5   2   32.80    8.40
  -4  -5   2   47.20    8.50
  -3  -5   2    0.40    8.30
  -2  -5   2  270.87   16.70
  -1  -5   2  105.89   12.60
   0  -5   2  876.01   31.60
   1  -5   2   80.79   11.00
   1  -5   2  108.39   11.30
   2  -5   2  287.87   16.20
  -3   5  -2    1.90    5.50
   3  -5   2    4.80    6.90
  -4   5  -2   69.39    8.70
   4  -5   2   76.39   10.20
  -5   5  -2   25.40   10.30
   5  -5   2   26.10    7.40
  -6   5  -2   15.70   13.50
  -6   5  -2   17.40   10.20
  -7   5  -2   -4.90    8.70
  -7   5  -2   14.60   12.30
   7  -5   2    4.40    7.70
   8  -5   2   14.50    7.20
  -8  -4   2   14.40    7.50
  -7  -4   2   58.49   10.10
  -7  -4   2   41.70    9.60
  -6  -4   2   15.80    8.60
  -6  -4   2    4.10    8.30
   5   4  -2  156.88   15.40
  -5  -4   2  135.99   14.30
  -3  -4   2   43.10    8.50
  -2  -4   2   25.60    7.30
  -1  -4   2   57.69    7.40
  -1  -4   2   60.69    8.90
   0  -4   2  198.68   11.50
   0  -4   2  191.48   11.90
   1  -4   2   72.59    9.40
   1  -4   2   83.29    9.70
   2  -4   2   10.90    5.60
  -3   4  -2   38.10    6.00
   3  -4   2   47.70    7.20
   4  -4   2   83.09   11.50
  -6   4  -2  -15.00   13.60
  -6   4  -2   -5.40    8.80
  -7   4  -2   42.90   13.20
  -7   4  -2   53.19   10.90
   7  -4   2   60.59    9.10
  -8   4  -2   27.90    9.40
   8  -4   2   33.90    6.60
  -8  -3   2    9.10    6.30
  -8  -3   2    2.30    7.20
  -7  -3   2   11.70    8.70
  -7  -3   2    6.80    8.00
  -6  -3   2   11.70    7.90
  -6  -3   2    3.10    7.80
   5   3  -2   -0.70    7.60
  -5  -3   2   -0.20    6.30
  -2  -3   2  395.26   17.30
  -1  -3   2    0.60    4.60
  -1  -3   2   -7.10    5.40
   0  -3   2 1822.72   58.09
   1  -3   2    2.60    5.00
   2  -3   2  474.75   18.70
  -3   3  -2  450.05   18.10
   3  -3   2  475.85   19.00
   4  -3   2   14.30    5.60
   5  -3   2    5.50    6.00
  -6   3  -2   24.50   15.40
  -6   3  -2   -1.80    8.90
  -7   3  -2   13.20   12.30
   7  -3   2    4.30    7.60
  -8   3  -2    4.50    9.00
   8  -3   2   -1.90    6.10
  -8  -2   2   53.09    9.60
  -8  -2   2   20.30   12.20
  -7  -2   2  172.08   15.90
  -7  -2   2  143.99   15.70
  -6  -2   2   87.09   11.00
  -6  -2   2   98.19   13.50
   5   2  -2   59.19    9.60
  -5  -2   2   54.79    8.70
   4   2  -2   47.20    7.70
  -2  -2   2  125.39   10.90
  -2  -2   2  148.59    8.50
  -1  -2   2  319.57   12.90
   0  -2   2  231.28    9.50
   1  -2   2  308.27   12.20
   2  -2   2  133.39    8.80
   3  -2   2  241.48   12.20
   4  -2   2   41.90    6.50
   5  -2   2   57.79    7.70
  -6   2  -2  219.28   35.50
  -6   2  -2  158.68   23.90
  -7   2  -2  164.68   19.00
   7  -2   2  159.08   13.40
  -8   2  -2   71.09   11.20
   8  -2   2   55.89    7.60
  -8  -1   2   13.00    8.10
   7   1  -2   16.80    7.20
  -7  -1   2   18.00    8.70
  -7  -1   2    0.90    7.10
   6   1  -2  151.08   12.90
  -6  -1   2  166.38   14.70
  -6  -1   2  145.89   14.60
   5   1  -2  219.98   15.30
   4   1  -2   31.80    7.30
  -2  -1   2  650.83   22.60
   1   1  -2  215.08   15.30
  -1  -1   2  208.38   16.10
   0   1  -2  632.34   24.10
   0  -1   2  602.34   23.70
   1  -1   2  162.38    7.10
   2  -1   2  653.73   22.50
   3  -1   2  489.85   19.00
   4  -1   2   32.00    6.00
   5  -1   2  169.78   11.80
  -7   1  -2   19.70   11.90
  -7   1  -2    6.40    8.30
   7  -1   2   16.00    7.60
   8  -1   2    4.60    6.20
   8   0  -2   -1.70    5.70
  -8   0   2   -1.50    7.40
   7   0  -2    2.70    6.90
  -7   0   2    1.50    8.10
   6   0  -2   43.60    8.40
  -6   0   2   30.00    8.50
   5   0  -2    4.30    6.30
   4   0  -2    0.90    5.70
   3   0  -2   22.10    6.10
   2   0  -2   32.40    5.20
   1   0  -2 1745.63   57.29
   1   0  -2 1543.85   57.09
  -1   0   2 1762.72   57.79
   0   0   2  188.68    7.80
  -1   0  -2 1546.55   50.79
   1   0   2 1584.44   49.99
   1   0   2 1488.65   50.19
   2   0   2   23.50    4.50
   3   0   2   11.60    4.80
   4   0   2    7.70    5.20
   5   0   2    6.10    5.30
  -6   0  -2   43.00    9.70
  -7   0  -2    8.60    8.10
   7   0   2    0.20    7.30
   8   0   2   -1.70    5.90
   8  -1  -2    0.90    5.80
  -8   1   2    7.10    7.20
   7  -1  -2   17.90    7.60
  -7   1   2    8.40   10.40
  -7   1   2   16.50    8.80
   6  -1  -2  175.78   12.90
   5  -1  -2  194.88   13.40
   4  -1  -2   31.40    6.50
   3  -1  -2  495.25   18.50
   3  -1  -2  536.55   20.50
   2  -1  -2  711.93   24.90
   1  -1  -2  200.78    9.00
   0  -1  -2  599.44   22.80
   0   1   2  595.54   23.00
  -1  -1  -2  211.58   12.60
  -2  -1  -2  683.23   28.80
   2   1   2  652.13   26.10
   2   1   2  595.64   27.00
   3   1   2  480.55   18.20
   4   1   2   29.00    6.00
   5   1   2  180.88   12.30
  -6  -1  -2  147.99   14.40
  -7  -1  -2   23.70    8.90
  -8  -1  -2   15.90    7.90
   8  -2  -2   56.89    7.40
  -8   2   2   45.80    8.50
   7  -2  -2  141.09   13.40
  -7   2   2  129.59   16.60
  -7   2   2  137.99   17.50
   6  -2  -2   90.39   10.10
  -6   2   2  116.69   17.50
   5  -2  -2   61.09    8.20
   4  -2  -2   45.50    7.10
   3  -2  -2  295.27   14.50
   2  -2  -2  139.49    9.50
   1  -2  -2  275.47   11.50
   0  -2  -2  214.48   17.40
   0   2   2  239.18   17.90
  -1  -2  -2  313.97   18.70
   1   2   2  284.47   17.90
  -2  -2  -2  148.29   16.90
   2   2   2  138.59   15.30
   4   2   2   42.40    6.70
  -5  -2  -2   48.40    8.20
  -6  -2  -2  101.59   13.00
  -6  -2  -2   93.29   13.40
  -7  -2  -2  131.09   14.90
  -7  -2  -2  126.89   15.70
  -8  -2  -2   48.30    8.70
   8  -3  -2    4.30    6.10
  -8   3   2    2.30   10.00
   7  -3  -2    1.10    7.80
  -7   3   2    2.20    9.00
  -7   3   2   -8.90   10.90
   6  -3  -2    7.40    7.50
  -6   3   2   14.00   13.10
  -6   3   2   -3.10    8.60
   5  -3  -2    0.20    6.10
   4  -3  -2   13.20    6.10
   3  -3  -2  456.25   19.10
   2  -3  -2  449.76   17.50
   2  -3  -2  512.65   19.10
   1  -3  -2    6.70    4.50
   1  -3  -2    3.50    4.60
   0  -3  -2 1770.52   56.49
  -1  -3  -2   -6.00    4.60
  -2  -3  -2  386.46   16.10
  -3  -3  -2  426.56   18.80
  -5  -3  -2   14.10    7.20
  -6  -3  -2   16.70    8.70
  -6  -3  -2    4.40    8.00
  -7  -3  -2    0.20    8.40
  -7  -3  -2   -5.90    7.90
  -8  -3  -2    5.50    7.30
   8  -4  -2   25.70    6.10
   7  -4  -2   69.49    9.30
  -7   4   2   58.59   13.70
  -7   4   2   63.49   11.40
   6  -4  -2   13.90    8.00
  -6   4   2    1.70    9.50
  -6   4   2    1.60   12.70
   4  -4  -2   90.19   11.00
   3  -4  -2   31.10    6.40
   2  -4  -2    5.30    5.60
   2  -4  -2    5.40    4.90
   1  -4  -2   50.29    6.10
   1  -4  -2   63.09    8.40
   0  -4  -2  196.58   10.80
   0  -4  -2  175.48   11.00
  -1  -4  -2   70.59    7.30
  -2  -4  -2    7.10    6.00
  -3  -4  -2   35.10    7.50
  -5  -4  -2  153.58   14.30
  -6  -4  -2    6.60    8.80
  -6  -4  -2   17.20    8.10
  -7  -4  -2   36.70    9.30
  -7  -4  -2   34.40    9.40
  -8  -4  -2   16.80    7.70
   7  -5  -2   -5.40    6.50
  -7   5   2    3.70   11.00
  -7   5   2    5.60    9.30
   6  -5  -2   15.00    7.80
   6  -5  -2   21.80    8.30
  -6   5   2   12.30   10.30
  -6   5   2    9.60   12.00
   5  -5  -2   57.39    9.00
   5  -5  -2   41.00    7.80
  -5   5   2   43.20   11.30
   4  -5  -2   62.79    9.30
  -4   5   2   65.59    8.20
   3  -5  -2    3.50    6.40
   2  -5  -2  299.37   14.90
   2  -5  -2  289.57   15.50
   1  -5  -2  114.29   11.20
   1  -5  -2   95.59    9.90
   0  -5  -2  883.31   31.70
  -1  -5  -2   96.39   11.10
  -2  -5  -2  242.68   14.60
  -3  -5  -2  -14.20    7.20
  -4  -5  -2   47.10    8.80
  -5  -5  -2   36.00    8.80
  -5  -5  -2   25.70    9.30
  -6  -5  -2   25.10    9.50
  -6  -5  -2   -7.40    7.60
  -7  -5  -2    2.40    7.30
  -7  -5  -2  -11.50    7.90
  -8  -5  -2   13.80    7.10
  -7   6   2   28.50    9.50
   6  -6  -2   10.30    7.30
  -6   6   2    2.60   11.60
  -6   6   2   17.80   11.20
   5  -6  -2   23.10    7.60
  -5   6   2   34.80   11.80
  -5   6   2   27.70   12.60
   4  -6  -2  223.08   15.20
  -4   6   2  208.38   15.30
   3  -6  -2  100.99   13.40
   2  -6  -2  173.38   14.30
   2  -6  -2  197.18   14.20
   1  -6  -2   44.80    7.80
   0  -6  -2   12.60    7.30
  -1  -6  -2   21.30    7.30
  -2  -6  -2  165.28   14.40
  -3  -6  -2  104.19   14.50
  -3  -6  -2  101.99   14.40
  -4  -6  -2  182.98   16.00
  -4  -6  -2  143.09   14.90
  -5  -6  -2   21.90    9.70
  -5  -6  -2   25.80    9.30
  -6  -6  -2   30.30    9.80
  -6  -6  -2   16.20    9.10
  -7  -6  -2   12.80    8.30
  -7  -6  -2   10.30    7.20
  -7   7   2   15.50    7.90
   6  -7  -2   19.90    7.10
  -6   7   2   10.50   11.80
   5  -7  -2   90.99   13.10
  -5   7   2   62.49   13.60
  -5   7   2   20.10   11.90
   4  -7  -2   87.09   11.60
   4  -7  -2   92.79   13.50
  -4   7   2  108.09   13.30
  -4   7   2   99.09   15.20
   3  -7  -2   68.69    8.90
   3  -7  -2   70.89   10.90
   2  -7  -2   43.70    9.50
   1  -7  -2   65.39   10.30
   0  -7  -2   48.90    9.90
  -1  -7  -2   53.39    9.90
  -2  -7  -2   22.60   10.10
  -3  -7  -2   28.40   10.50
  -3  -7  -2   42.10   10.20
  -3  -7  -2   41.90    8.40
  -3  -7  -2   61.69   11.00
  -4  -7  -2   62.29   11.00
  -4  -7  -2   74.39   11.60
  -4  -7  -2   79.89    9.70
  -5  -7  -2   52.79   11.20
  -5  -7  -2   46.70   10.60
  -6  -7  -2    8.80    8.40
  -6  -7  -2   17.80    9.10
  -7  -7  -2    3.10    7.10
   6  -8  -2   30.20    6.90
  -6   8   2   36.90   12.90
   5  -8  -2   14.40    8.10
  -5   8   2  -12.10   13.70
   4  -8  -2   29.00    9.80
   4  -8  -2   17.40    8.00
  -4   8   2   21.60    9.10
  -4   8   2   34.40   15.00
   3  -8  -2  168.98   18.40
   3  -8  -2  145.19   16.60
   3  -8  -2  132.19   14.30
   3  -8  -2  137.19   17.20
  -3   8   2  161.28   16.10
   2  -8  -2   45.40   10.80
   2  -8  -2   36.00   11.50
   2  -8  -2   33.20    7.60
   1  -8  -2  154.08   16.10
   1  -8  -2  160.98   19.00
   0  -8  -2    9.10   10.40
  -1  -8  -2  146.69   20.70
  -1  -8  -2  116.99   14.80
  -1  -8  -2  108.49   14.00
  -2  -8  -2   36.70    9.10
  -2  -8  -2   39.70   11.50
  -2  -8  -2   30.30   12.00
  -3  -8  -2  127.29   15.10
  -3  -8  -2  146.69   16.70
  -3  -8  -2  110.29   14.50
  -4  -8  -2   40.10    9.10
  -4  -8  -2   20.10    9.60
  -5  -8  -2    2.00    8.90
  -6  -8  -2   34.50    9.20
   5  -9  -2   47.90    8.20
  -5   9   2   66.09   19.20
   4  -9  -2   54.79    9.10
   4  -9  -2   22.80    7.30
  -4   9   2   40.50   18.80
   3  -9  -2   13.00   14.20
   3  -9  -2    2.10    6.70
   3  -9  -2   -0.10   10.20
   3  -9  -2    1.90    9.90
  -3   9   2    8.20    8.50
   2  -9  -2   54.09   12.00
   2  -9  -2   41.40   13.40
   2  -9  -2   14.20   10.30
  -2   9   2   47.90   10.60
   1  -9  -2   33.90   12.50
   1  -9  -2   44.10   12.20
   1  -9  -2   43.70   10.70
   1  -9  -2   21.40   12.20
   0  -9  -2   13.00   11.50
   0  -9  -2   17.70    9.20
   0  -9  -2   -9.90    8.40
   0  -9  -2    1.80   10.60
   0  -9  -2    8.50   12.00
  -1  -9  -2   43.50    9.90
  -1  -9  -2   38.50   10.90
  -1  -9  -2   42.80   14.00
  -1  -9  -2   45.00   12.60
  -2  -9  -2   38.90   11.90
  -2  -9  -2   41.20    9.80
  -2  -9  -2   43.00   10.20
  -3  -9  -2    7.50    9.90
  -3  -9  -2   16.10    8.80
  -4  -9  -2   23.20   10.00
  -4  -9  -2   48.70    9.30
  -5  -9  -2   33.80    8.90
   5 -10  -2    0.00    5.10
  -5  10   2  -26.50   15.00
   4 -10  -2   40.20    7.40
   4 -10  -2   22.50    5.80
  -4  10   2   62.99   21.70
   3 -10  -2    6.30    7.00
   3 -10  -2   22.10    7.20
   2 -10  -2   13.50   14.70
   2 -10  -2   11.70   10.50
   2 -10  -2   19.10   10.70
   1 -10  -2   41.60   12.30
   1 -10  -2   48.40   10.80
   1 -10  -2   52.19   14.30
   0 -10  -2   17.00   11.00
   0 -10  -2   15.00    8.70
   0 -10  -2   -6.10   11.10
   0 -10  -2   12.00    8.90
  -1 -10  -2   30.40    9.20
  -1 -10  -2   28.00   11.50
  -1 -10  -2   18.30   10.10
  -2 -10  -2   19.20   10.90
  -2 -10  -2   27.30    9.20
  -2 -10  -2   12.20    9.40
  -3 -10  -2   -0.10    8.80
  -3 -10  -2   23.50    8.40
  -4 -10  -2    9.70    6.40
  -4 -10  -2   33.90    7.80
  -5 -10  -2    9.60    5.80
   3 -11  -2   18.50    6.50
   2 -11  -2    7.50   12.80
   2 -11  -2    1.60    5.80
   2 -11  -2   18.20    8.90
   1 -11  -2   15.20   12.10
   1 -11  -2    2.60    8.50
   1 -11  -2   -1.30    5.40
   0 -11  -2    8.40    7.60
   0 -11  -2   11.20   11.30
   0 -11  -2   11.20    8.10
   0 -11  -2    4.40    7.00
  -1 -11  -2    9.40    9.50
  -1 -11  -2   30.40    8.20
  -1 -11  -2   17.50    9.40
  -2 -11  -2    9.60    8.00
  -2 -11  -2   -1.00    6.80
  -3 -11  -2   11.80    6.80
  -3 -11  -2   18.50    6.30
   1 -12  -2   37.40    7.10
   0 -12  -2   14.20    5.50
  -1 -12  -2   15.70    5.90
  -1 -12  -2   29.80    6.00
  -1 -12   3    0.60    5.50
  -1 -12   3    5.90    6.30
   0 -12   3  146.39   15.10
   0 -12   3  164.38   10.70
   1 -12   3    4.30    6.00
   1 -12   3   15.60    8.70
  -3 -11   3   21.10    6.70
  -3 -11   3   24.60    6.00
  -2 -11   3   10.10    6.80
  -2 -11   3   12.70    7.50
  -2 -11   3    2.00    7.50
  -1 -11   3   15.50    8.70
  -1 -11   3   32.30    7.60
   0 -11   3  166.38   13.60
   0 -11   3  176.38   22.00
   1 -11   3   28.90    9.10
   1 -11   3   27.20   14.30
   2 -11   3   -2.80    7.40
   2 -11   3    7.20   11.80
  -3  11  -3   44.10   12.80
   3 -11   3   22.40    5.80
  -5 -10   3   12.30    6.00
  -4 -10   3    5.10    7.20
  -4 -10   3   -5.10    6.60
  -3 -10   3   -0.40    7.90
  -3 -10   3   13.90    8.20
  -3 -10   3   12.90    7.40
  -2 -10   3   18.10    9.40
  -2 -10   3   -4.10    9.90
  -2 -10   3    6.00    8.10
  -1 -10   3   54.19    9.80
  -1 -10   3   40.20   11.70
  -1 -10   3   43.30   10.90
   0 -10   3   20.70    8.40
   0 -10   3   18.70   10.80
   0 -10   3   23.40    9.10
   1 -10   3   34.80   10.50
   1 -10   3   40.60   12.10
   2 -10   3    7.50   10.30
   2 -10   3   13.00   14.40
   3 -10   3    7.90    6.30
   3 -10   3    7.20    7.00
   3 -10   3   12.10   15.60
  -4  10  -3   46.70   20.40
   4 -10   3   10.00    6.30
   4 -10   3    2.90    4.70
  -5  10  -3   10.50   13.00
   5 -10   3   11.30    5.40
  -5  -9   3   15.60    7.60
  -5  -9   3   18.60    7.40
  -4  -9   3   28.00    8.80
  -4  -9   3    4.60    8.20
  -3  -9   3   94.79   12.00
  -3  -9   3  113.79   14.30
  -3  -9   3  104.99   16.50
  -2  -9   3   78.19   12.20
  -2  -9   3   66.39   10.10
  -2  -9   3   65.39   12.80
  -1  -9   3    7.40   10.50
  -1  -9   3    6.30    8.40
  -1  -9   3   19.20   11.10
  -1  -9   3   -3.50   12.30
   0  -9   3   72.39   12.40
   0  -9   3   80.09   15.00
   0  -9   3   70.19   10.90
   0  -9   3   94.59   11.20
  -1   9  -3   29.50    8.90
   1  -9   3   15.30   11.10
   1  -9   3   17.50    9.70
  -2   9  -3  104.49   11.90
   2  -9   3   69.69   14.00
   2  -9   3   61.29    8.30
   2  -9   3   69.19   12.10
  -3   9  -3  129.49   15.00
   3  -9   3  107.89   13.00
   3  -9   3  119.59   19.30
   3  -9   3  120.49   16.30
  -4   9  -3   35.00   15.90
   4  -9   3   20.10    7.90
   4  -9   3    9.30    6.40
  -5   9  -3   23.20   14.70
   5  -9   3   24.50    7.10
  -6  -8   3    3.40    7.80
  -5  -8   3   48.70    8.70
  -5  -8   3   42.70    9.50
  -5  -8   3   50.99   10.90
  -4  -8   3   15.50    9.80
  -4  -8   3   18.60    9.30
  -4  -8   3   19.90    7.60
  -3  -8   3    5.20    7.90
  -3  -8   3    0.60    9.50
  -3  -8   3   12.80    7.60
  -2  -8   3   50.49   11.50
  -2  -8   3   40.90   13.40
  -2  -8   3   50.99    8.40
  -1  -8   3   21.70    7.90
  -1  -8   3   42.40   12.90
   0   8  -3   55.09    9.40
   0  -8   3   40.90   12.70
   0  -8   3   53.49   10.70
  -1   8  -3   24.10    8.20
   1  -8   3   27.20   14.00
   1  -8   3   23.90    9.50
  -2   8  -3   49.80    9.10
   2  -8   3   37.30   10.40
   2  -8   3   34.60    7.50
  -3   8  -3    6.00    8.40
   3  -8   3    0.50    9.30
   3  -8   3   13.40    7.30
  -4   8  -3   17.50    8.20
   4  -8   3   31.90    8.40
   4  -8   3   23.50    9.50
  -5   8  -3   57.79   14.70
   5  -8   3   50.29    8.70
  -6   8  -3   -5.00   10.00
   6  -8   3   -0.40    6.10
  -7  -7   3   -1.90    7.20
  -6  -7   3    8.30    8.10
  -6  -7   3   14.00    8.90
  -5  -7   3   59.19   10.60
  -5  -7   3   60.69   13.10
  -5  -7   3   49.40   10.50
  -4  -7   3   39.90   10.40
  -4  -7   3   53.59   11.10
  -4  -7   3   62.09    9.40
  -4  -7   3   42.50    8.70
  -3  -7   3   35.80   11.90
  -3  -7   3   57.79   11.20
  -3  -7   3   41.20   10.00
  -2  -7   3   16.10   10.30
  -1  -7   3   69.59   11.60
   0  -7   3   46.20   10.50
   1  -7   3   60.69   16.80
   1  -7   3   73.39   11.20
  -2   7  -3   34.30    8.30
   2  -7   3   26.60    9.30
  -3   7  -3   51.79    9.00
   3  -7   3   56.39    8.50
   3  -7   3   66.89   11.10
  -4   7  -3   56.49    9.60
   4  -7   3   52.89    8.80
  -5   7  -3   51.99   12.80
   5  -7   3   59.89    9.40
  -6   7  -3    7.00   12.20
  -6   7  -3   19.80   11.50
   6  -7   3   25.20    7.30
  -7   7  -3   -3.60    6.90
  -7  -6   3    8.40    6.90
  -7  -6   3   19.20    8.50
  -6  -6   3   21.70    9.00
  -6  -6   3   28.60   10.00
  -5  -6   3    2.80    8.70
  -5  -6   3   -6.50    7.80
  -4  -6   3   31.80    8.60
  -4  -6   3   34.30    9.30
  -3  -6   3  157.58   16.20
  -3  -6   3  126.09   14.00
  -2  -6   3  223.08   18.10
  -1  -6   3  218.38   16.00
   0  -6   3   -1.60    7.40
   1  -6   3  217.78   15.00
   1  -6   3  212.88   15.50
   2  -6   3  208.18   15.60
  -3   6  -3  154.38   12.50
   3  -6   3  147.69   14.70
  -4   6  -3   30.20    8.10
   4  -6   3   30.80    7.40
  -5   6  -3   -6.20   12.60
  -5   6  -3    8.30   10.10
   5  -6   3   -5.70    6.80
  -6   6  -3   30.60   10.80
  -6   6  -3   21.30   12.30
   6  -6   3   30.10    8.70
   6  -6   3   21.90    7.90
  -7   6  -3   19.40    8.50
  -7   6  -3   11.00   11.10
   7  -6   3   16.50    6.60
  -8  -5   3   27.30    7.20
  -7  -5   3   10.80    8.30
  -7  -5   3    4.80    7.90
  -6  -5   3   64.59   10.70
  -6  -5   3   65.89   11.60
  -5  -5   3   47.90    9.70
  -5  -5   3   30.00    8.30
  -4  -5   3   39.20    8.30
  -3  -5   3  101.49   14.10
  -2  -5   3   26.60    8.70
  -1  -5   3   23.80    7.50
   0  -5   3    4.00    6.50
   0  -5   3   -2.70    6.20
   1  -5   3   23.00    7.10
   1  -5   3   45.80    7.60
   2  -5   3   23.50    7.30
  -3   5  -3  117.89   10.80
   3  -5   3  121.69   12.80
  -4   5  -3   34.50    7.30
   4  -5   3   11.90    7.80
  -5   5  -3   51.69   11.70
  -5   5  -3  106.29   31.10
   5  -5   3   69.89    8.50
  -6   5  -3   51.09   11.40
  -6   5  -3   59.69   15.30
  -7   5  -3   16.00   11.50
  -7   5  -3   13.60    9.30
   7  -5   3    5.30    7.40
  -8  -4   3   23.40    7.60
  -7  -4   3   25.00    8.90
  -7  -4   3   19.40    8.70
  -6  -4   3   15.30    8.70
  -6  -4   3    7.70    8.20
   5   4  -3   98.29   14.40
  -5  -4   3   90.19   12.20
  -2  -4   3  154.28   13.10
  -1  -4   3  184.78   11.40
  -1  -4   3  195.98   12.70
   0  -4   3  821.62   29.00
   0  -4   3  817.92   29.20
   1  -4   3  183.68   11.60
   1  -4   3  212.88   12.30
   2  -4   3  165.48   11.80
  -3   4  -3  235.38   12.50
   3  -4   3  250.77   14.20
   4  -4   3    5.00    6.10
  -6   4  -3   -6.40   14.40
  -6   4  -3    8.30    9.30
  -7   4  -3   -4.00   12.20
   7  -4   3   -3.20    7.40
  -8   4  -3   31.20    9.70
   8  -4   3   24.80    6.40
  -8  -3   3   17.20    6.70
  -8  -3   3    3.50    7.30
  -7  -3   3   32.00    9.90
  -7  -3   3   24.20    8.90
  -6  -3   3   14.10    8.60
  -6  -3   3   56.29    9.60
   5   3  -3   92.49   14.00
  -5  -3   3   89.99   12.40
  -2  -3   3  304.27   15.60
  -1  -3   3  184.18   12.10
  -1  -3   3  190.18   10.90
   0  -3   3  738.83   25.70
   1  -3   3  211.78   11.50
   2  -3   3  345.87   15.10
  -3   3  -3  924.51   31.70
   3  -3   3  943.41   33.20
   4  -3   3   93.79    9.80
   5  -3   3   97.69   10.90
  -6   3  -3   25.50    9.90
  -6   3  -3   57.49   17.00
  -7   3  -3   34.10   13.60
   7  -3   3   22.80    8.40
  -8   3  -3   16.70    9.60
   8  -3   3   13.80    6.30
  -8  -2   3   12.90    6.70
  -8  -2   3   21.90    8.30
  -7  -2   3   -4.30    8.30
  -7  -2   3   11.00    7.80
  -6  -2   3   23.70    7.90
  -6  -2   3    6.90    8.00
   5   2  -3   12.70    8.00
  -5  -2   3    9.90    7.00
  -2  -2   3  594.44   20.90
  -2  -2   3  572.64   22.50
  -1  -2   3  194.18   10.10
   0  -2   3    9.60    4.10
   1  -2   3  187.18    9.10
   2  -2   3  619.14   21.90
   3  -2   3  195.28   11.40
   4  -2   3   19.50    5.60
   5  -2   3   12.90    5.50
  -6   2  -3   39.50   18.20
  -7   2  -3    9.30   12.10
   7  -2   3   16.50    8.10
  -8   2  -3   37.60   10.20
   8  -2   3   30.00    6.70
  -8  -1   3   19.70    8.30
   7   1  -3   45.30    7.90
  -7  -1   3   27.00    9.10
  -7  -1   3   37.30    8.90
   6   1  -3   84.69   10.70
  -6  -1   3   92.39   11.80
  -6  -1   3  104.59   13.80
   5   1  -3   42.20    8.60
  -5  -1   3   55.59   12.60
   4   1  -3   13.80    7.10
  -2  -1   3   24.40    5.00
   1   1  -3 2318.07   76.29
  -1  -1   3 2234.28   76.09
   0   1  -3  706.53   27.00
   0  -1   3  706.43   27.00
   1  -1   3 1902.81   59.39
   2  -1   3   17.30    4.20
   3  -1   3  300.97   13.30
   4  -1   3   10.00    5.10
   5  -1   3   24.50    5.70
  -7   1  -3   56.79   13.80
   7  -1   3   53.39    8.90
   8  -1   3   16.20    6.30
   8   0  -3   34.00    6.60
  -8   0   3   45.40    9.10
   7   0  -3   -4.20    6.70
  -7   0   3   -9.60    8.10
   6   0  -3   39.50    8.50
  -6   0   3   32.90    8.80
   5   0  -3   20.20    7.30
   4   0  -3  221.18   14.20
   3   0  -3   10.60    6.10
   2   0  -3    1.80    4.80
   1   0  -3 3643.64  116.29
  -1   0   3 3551.14  116.39
   0   0  -3   -1.60    3.40
   0   0   3    1.80    3.30
  -1   0  -3 3036.80   95.69
   2   0   3    3.10    3.70
   3   0   3   13.90    4.70
   4   0   3  170.98   10.80
   5   0   3   20.20    5.40
  -6   0  -3   49.80   10.00
  -7   0  -3   -6.20    7.50
   7   0   3   -0.40    7.40
   8   0   3   47.20    7.20
   8  -1  -3   13.10    6.30
  -8   1   3   20.20    7.90
   7  -1  -3   33.30    7.90
  -7   1   3   41.10   10.30
  -7   1   3   54.09    9.60
   6  -1  -3  107.49   11.30
   5  -1  -3   39.10    8.00
   4  -1  -3    4.10    5.90
   3  -1  -3  329.87   13.70
   3  -1  -3  334.87   15.70
   2  -1  -3   22.70    5.70
   1  -1  -3 2223.08   69.79
   0  -1  -3  665.03   25.40
   0   1   3  677.23   25.70
  -2  -1  -3   25.60    8.40
   3   1   3  303.87   13.00
   4   1   3   12.10    5.30
  -6  -1  -3   94.79   12.90
  -7  -1  -3   31.90    9.40
   8  -2  -3   24.60    6.50
  -8   2   3   29.10    8.00
   7  -2  -3    9.20    7.40
  -7   2   3   -2.00    8.60
  -7   2   3   -6.30   10.30
   6  -2  -3   17.50    7.40
  -6   2   3    9.50    9.00
  -6   2   3   12.60   16.00
   5  -2  -3    1.80    6.20
   4  -2  -3    9.80    6.00
   3  -2  -3  191.48   10.30
   3  -2  -3  217.78   12.50
   2  -2  -3  646.84   23.20
   1  -2  -3  176.48    9.00
   0  -2  -3    0.60    8.10
   0   2   3    9.70    9.20
  -1  -2  -3  186.08   15.30
   1   2   3  176.08   14.70
  -2  -2  -3  641.94   29.50
   4   2   3   16.70    5.30
  -5  -2  -3    7.80    6.70
  -6  -2  -3   11.50    8.10
  -6  -2  -3   44.90    9.10
  -7  -2  -3   -0.50    7.90
  -8  -2  -3   28.50    7.80
   8  -3  -3   14.50    6.30
  -8   3   3   26.50    7.20
   7  -3  -3    8.90    7.60
  -7   3   3    4.20    9.00
  -7   3   3    8.20   11.60
   6  -3  -3   37.20    8.40
  -6   3   3   59.79   10.90
  -6   3   3   36.40   13.60
   5  -3  -3   90.29   11.50
   4  -3  -3   95.29   10.70
   3  -3  -3  991.40   35.10
   2  -3  -3  318.07   13.70
   2  -3  -3  334.77   14.70
   1  -3  -3  186.08    9.80
   1  -3  -3  188.48   10.00
   0  -3  -3  690.13   23.70
   0  -3  -3  691.13   23.90
  -1  -3  -3  170.38    9.90
  -2  -3  -3  287.67   13.30
  -3  -3  -3  868.11   31.20
   4   3   3   96.39   12.50
  -5  -3  -3  112.39   13.50
  -6  -3  -3   25.10    8.70
  -6  -3  -3   38.60    9.50
  -7  -3  -3    8.70    8.80
  -7  -3  -3   15.50    8.20
  -8  -3  -3   19.10    7.60
   8  -4  -3   26.80    6.10
   7  -4  -3   10.30    7.40
  -7   4   3    7.10    9.70
  -7   4   3    1.40   11.60
   6  -4  -3   14.70    7.90
  -6   4   3   11.70   12.40
  -6   4   3  -11.60    9.00
   4  -4  -3    5.10    5.90
   3  -4  -3  225.68   13.30
   2  -4  -3  124.49    9.50
   2  -4  -3  122.99   10.20
   1  -4  -3  190.28   10.80
   1  -4  -3  175.58   10.80
   0  -4  -3  778.12   27.10
   0  -4  -3  765.52   27.20
  -1  -4  -3  174.08   11.00
  -2  -4  -3  120.19   10.40
  -3  -4  -3  192.78   13.80
  -5  -4  -3   89.59   13.50
  -6  -4  -3   -1.80    9.00
  -6  -4  -3   15.40    7.80
  -7  -4  -3   -0.80    7.80
  -7  -4  -3    5.30    8.20
  -8  -4  -3   31.60    7.90
   7  -5  -3    8.70    7.00
  -7   5   3   17.50   11.50
  -7   5   3   15.50    9.70
   6  -5  -3   71.59    9.00
   6  -5  -3   67.99   10.00
  -6   5   3   50.59   14.10
  -6   5   3   60.59   12.30
   5  -5  -3   70.79    8.50
   5  -5  -3   59.99    9.10
  -5   5   3  104.89   25.70
  -5   5   3   46.10   11.80
   4  -5  -3   18.10    7.50
   3  -5  -3   86.99   10.80
   2  -5  -3   17.60    6.50
   2  -5  -3   19.50    6.30
   1  -5  -3   26.10    6.50
   1  -5  -3   20.20    6.50
   0  -5  -3   -2.50    5.70
  -1  -5  -3   41.00    7.20
  -2  -5  -3   18.50    6.80
  -3  -5  -3   97.59   13.30
  -4  -5  -3   11.40    7.70
  -5  -5  -3   60.19    9.90
  -5  -5  -3   70.39   11.00
  -6  -5  -3   51.39   10.10
  -6  -5  -3   77.89   11.70
  -7  -5  -3    9.00    8.10
  -7  -5  -3    4.50    8.60
  -7   6   3   15.70    9.10
   6  -6  -3   27.30    7.50
  -6   6   3    4.20   10.90
  -6   6   3    4.30   11.50
   5  -6  -3   -6.20    6.60
  -5   6   3   20.00   13.00
  -5   6   3    8.10   10.80
   4  -6  -3   23.00    7.40
  -4   6   3   15.90    7.70
   3  -6  -3  115.59   13.60
   2  -6  -3  210.08   13.80
   2  -6  -3  202.08   14.80
   1  -6  -3  195.58   14.10
   0  -6  -3   -2.30    7.00
  -1  -6  -3  238.88   15.40
  -2  -6  -3  208.68   15.40
  -3  -6  -3  166.48   15.10
  -3  -6  -3  128.39   16.00
  -4  -6  -3   24.90    9.10
  -4  -6  -3   25.10    8.70
  -5  -6  -3   -5.50    7.80
  -5  -6  -3   -4.10    8.90
  -6  -6  -3   43.80   10.60
  -6  -6  -3   34.50   10.00
  -7  -6  -3   10.70    8.40
  -7  -6  -3    6.00    6.90
  -7   7   3    5.20    7.70
   6  -7  -3   10.80    6.80
  -6   7   3   12.00   12.10
   5  -7  -3   60.59    9.10
  -5   7   3   28.40   12.20
  -5   7   3   70.49   14.50
   4  -7  -3   48.60    8.60
   4  -7  -3   69.49   10.60
  -4   7   3   59.59    9.70
  -4   7   3   57.29   14.90
   3  -7  -3   67.99   11.00
   3  -7  -3   63.59   12.50
   3  -7  -3   73.29    9.00
   2  -7  -3   27.50    9.30
   1  -7  -3   81.99   10.50
   0  -7  -3   46.50    9.50
  -1  -7  -3   67.59   10.60
  -2  -7  -3   29.90    9.80
  -3  -7  -3   66.49    9.30
  -3  -7  -3   51.79   11.50
  -3  -7  -3   70.19   11.20
  -3  -7  -3   63.29   11.20
  -4  -7  -3   56.79   11.10
  -4  -7  -3   50.69    9.20
  -4  -7  -3   38.30   10.20
  -5  -7  -3   46.60   10.90
  -5  -7  -3   64.79   11.30
  -6  -7  -3    6.40    8.40
  -6  -7  -3   -2.80    8.60
  -7  -7  -3  -16.70    7.00
   6  -8  -3   -0.30    6.00
  -6   8   3   -5.60   12.00
   5  -8  -3   63.09    9.50
  -5   8   3   77.29   16.60
   4  -8  -3   30.80    8.50
   4  -8  -3   36.00   10.30
  -4   8   3   47.10   15.60
  -4   8   3    7.90    8.40
   3  -8  -3    7.40   10.00
   3  -8  -3    1.90    9.30
   3  -8  -3   -9.70   12.70
   3  -8  -3   -7.40    7.10
  -3   8   3   27.50    9.10
   2  -8  -3   55.19   11.60
   2  -8  -3   71.29   12.80
   2  -8  -3   49.80    8.40
   1  -8  -3   33.30   11.20
   1  -8  -3   42.30   10.80
   1  -8  -3   60.59   15.90
   0  -8  -3   34.00   11.10
  -1  -8  -3   25.00   11.10
  -1  -8  -3   37.70   11.50
  -1  -8  -3   30.50    9.20
  -2  -8  -3   44.90   12.70
  -2  -8  -3   37.10    9.60
  -2  -8  -3   54.89   11.90
  -3  -8  -3   14.90    8.50
  -3  -8  -3   12.60    9.50
  -3  -8  -3    9.40   11.20
  -4  -8  -3   17.40   10.10
  -4  -8  -3   26.80    8.80
  -5  -8  -3   44.60   10.50
  -6  -8  -3   -2.90    8.40
   5  -9  -3   19.70    7.50
  -5   9   3   26.40   18.40
   4  -9  -3   15.60    7.80
   4  -9  -3    8.50    7.20
  -4   9   3   62.59   20.40
   3  -9  -3   96.99   13.60
   3  -9  -3   85.79   16.20
   3  -9  -3   89.39   13.30
   3  -9  -3  110.09   12.40
  -3   9   3  116.39   15.00
   2  -9  -3  107.89   16.40
   2  -9  -3   96.29   15.10
   2  -9  -3  105.99   13.80
  -2   9   3   71.89   11.50
   1  -9  -3   17.50   11.50
   1  -9  -3   18.80   12.10
   1  -9  -3    6.90    9.40
   1  -9  -3    3.60   11.20
   0  -9  -3   77.29   12.80
   0  -9  -3   81.29   10.80
   0  -9  -3   77.59   11.40
   0  -9  -3   78.29   14.20
   0  -9  -3  117.39   15.10
  -1  -9  -3   -1.60    8.80
  -1  -9  -3   13.60   12.90
  -1  -9  -3   15.80   11.30
  -1  -9  -3   11.40   10.30
  -2  -9  -3   70.89   11.10
  -2  -9  -3   74.79   13.30
  -2  -9  -3   54.49   10.30
  -3  -9  -3   93.29   11.40
  -3  -9  -3   97.99   14.10
  -4  -9  -3   26.60    8.80
  -4  -9  -3    2.10    9.50
  -5  -9  -3   25.60    9.00
   5 -10  -3   20.30    5.60
  -5  10   3   -5.80   15.30
   4 -10  -3    1.10    5.10
   4 -10  -3   13.70    6.80
  -4  10   3    6.60   21.90
   3 -10  -3    7.10    7.20
   3 -10  -3   12.30    7.60
   2 -10  -3   -0.50   10.30
   2 -10  -3   -6.20   13.40
   2 -10  -3   23.00   11.20
   1 -10  -3   52.89   10.80
   1 -10  -3   92.19   15.00
   1 -10  -3   56.29   12.90
   0 -10  -3   22.10    9.10
   0 -10  -3    1.80    8.80
   0 -10  -3    6.30   11.60
   0 -10  -3    9.50   11.30
  -1 -10  -3   64.29   10.10
  -1 -10  -3   46.80   12.60
  -1 -10  -3   49.50   11.20
  -2 -10  -3   18.10   10.60
  -2 -10  -3   14.20    8.90
  -3 -10  -3   -1.00    9.00
  -3 -10  -3   17.80    8.30
  -4 -10  -3    4.80    7.00
  -4 -10  -3   -7.70    6.90
  -5 -10  -3   22.10    6.90
   3 -11  -3   13.20    4.60
   2 -11  -3    7.40    7.60
   2 -11  -3   20.50    9.00
   1 -11  -3   20.80   11.50
   1 -11  -3   38.40    9.20
   1 -11  -3    8.40    5.20
   0 -11  -3  150.18   14.00
   0 -11  -3  158.78   13.20
   0 -11  -3  181.78   19.60
  -1 -11  -3   14.00    7.70
  -1 -11  -3   22.30    9.00
  -1 -11  -3   11.30    5.60
  -2 -11  -3   10.30    7.10
  -2 -11  -3    6.10    8.10
  -3 -11  -3   26.10    6.70
  -3 -11  -3   29.50    7.70
   1 -12  -3    1.40    6.10
   1 -12  -3   10.40    8.70
   0 -12  -3  101.79    8.60
   0 -12  -3  169.38   13.00
  -1 -12  -3    9.70    5.50
  -1 -12  -3    3.00    5.70
  -1 -12   4   18.60    6.90
   0 -12   4   52.79    9.10
   0 -12   4   46.90    7.50
   1 -12   4   16.70    9.00
   1 -12   4   23.90    6.70
  -3 -11   4  -10.60    5.00
  -3 -11   4    2.90    6.10
  -2 -11   4   -3.80    6.10
  -2 -11   4    2.10    7.40
  -1 -11   4    6.50    6.90
  -1 -11   4   -0.50    8.30
   0 -11   4  147.29   15.10
   0 -11   4   89.19   12.00
   1 -11   4   10.30   14.10
   1 -11   4    5.60    8.40
   2 -11   4    3.40    6.90
   2 -11   4    7.70   11.90
  -3  11  -4   -6.30   11.10
   3 -11   4    0.00    4.70
  -5 -10   4   13.70    6.50
  -4 -10   4    7.50    6.70
  -4 -10   4   12.60    7.10
  -3 -10   4   27.70    8.80
  -3 -10   4   26.50    8.30
  -3 -10   4   10.10    7.60
  -2 -10   4   11.70    8.40
  -2 -10   4    8.50   10.10
  -2 -10   4   -0.60    8.90
  -1 -10   4    5.20    8.00
  -1 -10   4   22.00   10.00
   0 -10   4   -7.30    8.10
   0 -10   4   -0.50   10.00
   0 -10   4  -15.40    9.40
   1 -10   4   17.60   11.50
   1 -10   4   14.90    9.80
   2 -10   4    3.20   14.80
   2 -10   4    4.70   10.00
   3 -10   4    4.30   15.90
   3 -10   4   19.50    7.30
   3 -10   4   20.90    6.60
  -4  10  -4    8.70   18.70
   4 -10   4    4.40    4.80
   4 -10   4   -3.00    5.90
  -5  10  -4   11.10   12.10
   5 -10   4   23.60    5.70
  -5  -9   4   70.09    9.10
  -5  -9   4   68.79    9.80
  -4  -9   4   10.20    8.30
  -4  -9   4   -2.30    7.90
  -3  -9   4   44.50    9.20
  -3  -9   4   39.10   10.30
  -3  -9   4   37.30   11.10
  -2  -9   4    9.10    8.10
  -2  -9   4    8.90   10.10
  -2  -9   4   20.00   10.50
  -1  -9   4   79.79   15.50
  -1  -9   4   41.90   11.60
  -1  -9   4   61.09    9.90
  -1  -9   4   62.99   12.70
  -1  -9   4   50.89    9.90
   0  -9   4   19.00    8.80
   0  -9   4   44.20   11.40
   0  -9   4   31.40    9.20
   0  -9   4   40.40   13.40
  -1   9  -4   64.79    9.90
   1  -9   4   45.00   12.10
   1  -9   4   49.90   10.80
  -2   9  -4   14.20    8.80
   2  -9   4   17.70   12.00
   2  -9   4   22.60    6.80
   2  -9   4   36.60   11.10
  -3   9  -4   24.40    8.90
   3  -9   4   20.70   10.30
   3  -9   4   55.09   17.30
   3  -9   4   17.40    7.40
  -4   9  -4   34.00   16.00
   4  -9   4    5.50    6.20
   4  -9   4   12.80    7.70
  -5   9  -4  116.29   16.90
   5  -9   4  117.89   11.80
  -5  -8   4   -1.70    7.60
  -5  -8   4    5.00    7.10
  -5  -8   4    9.90    8.90
  -4  -8   4   74.79   12.30
  -4  -8   4   66.29    9.40
  -4  -8   4   70.99    9.40
  -4  -8   4   73.69   11.10
  -3  -8   4   26.20    7.90
  -3  -8   4   17.40    8.20
  -3  -8   4   26.00   10.40
  -2  -8   4   29.60   10.70
  -2  -8   4   39.40   13.40
  -2  -8   4   35.10   10.60
  -2  -8   4   37.70    8.00
  -1  -8   4   22.60    7.70
  -1  -8   4   17.60    8.70
  -1  -8   4    8.50   12.00
   0   8  -4   40.30    8.70
   0  -8   4   57.19   10.30
   0  -8   4   30.40   12.70
  -1   8  -4   20.20    8.00
   1  -8   4   12.30    9.10
  -2   8  -4   37.60    9.10
   2  -8   4   39.80    7.50
   2  -8   4   50.59   10.90
  -3   8  -4   23.90    9.00
   3  -8   4   19.80   10.00
   3  -8   4   16.50    7.60
  -4   8  -4   95.99   11.10
   4  -8   4   95.99   10.70
   4  -8   4  101.89   14.00
  -5   8  -4   22.00   13.40
   5  -8   4    0.90    7.50
  -6   8  -4    8.50   10.20
   6  -8   4   14.20    6.20
  -7  -7   4   47.20    8.80
  -6  -7   4    4.90    8.20
  -6  -7   4   -2.30    7.50
  -5  -7   4   22.70    7.60
  -5  -7   4   22.00    9.50
  -5  -7   4   24.50    9.00
  -4  -7   4    7.10    9.10
  -4  -7   4   13.20    8.90
  -4  -7   4   12.90    8.00
  -3  -7   4  157.98   16.50
  -3  -7   4  140.59   15.80
  -2  -7   4   53.99   11.90
  -1  -7   4   69.69   11.90
   0   7  -4  226.78   14.60
   0  -7   4  218.68   19.10
  -1   7  -4   54.69    8.30
   1  -7   4   42.30    9.70
   1  -7   4   58.99   11.00
  -2   7  -4   57.29    8.80
   2  -7   4   48.00   10.00
  -3   7  -4  194.78   15.60
   3  -7   4  170.88   16.80
   3  -7   4  180.08   13.60
  -4   7  -4   17.00    8.00
   4  -7   4   25.60    7.70
  -5   7  -4    2.20   11.20
   5  -7   4   26.50    7.90
  -6   7  -4    6.10   10.60
  -6   7  -4    7.00   12.40
   6  -7   4    1.40    6.60
  -7  -6   4   31.60    8.80
  -7  -6   4   16.50    6.00
  -6  -6   4   52.69   10.20
  -6  -6   4   52.59   10.40
  -5  -6   4   16.40    9.40
  -5  -6   4   24.10    8.80
  -4  -6   4   23.50    8.40
  -4  -6   4   33.50    9.30
  -3  -6   4  337.07   19.10
  -2  -6   4  224.38   18.20
  -1  -6   4   68.29   10.00
   0  -6   4   42.30    8.50
   0  -6   4   44.10    8.70
   1  -6   4   57.39    9.30
   1  -6   4   47.20    8.40
  -2   6  -4  234.58   14.20
   2  -6   4  244.48   16.50
  -3   6  -4  454.75   20.00
   3  -6   4  430.56   22.90
  -4   6  -4   40.70    8.40
   4  -6   4   28.80    7.50
  -5   6  -4    3.70   13.20
  -5   6  -4   22.30   10.90
   5  -6   4   15.80    7.30
  -6   6  -4   79.59   12.70
  -6   6  -4   38.20   13.30
   6  -6   4   61.79    8.90
   6  -6   4   65.89    9.40
  -7   6  -4   21.80   11.00
  -7   6  -4   25.90    8.50
   7  -6   4   21.90    6.90
  -8  -5   4   15.90    7.00
  -7  -5   4    2.10    7.60
  -7  -5   4    9.70    8.00
  -6  -5   4   -1.70    8.50
  -6  -5   4   -3.10    8.00
  -5  -5   4   28.30    8.40
  -5  -5   4   41.60    9.20
  -4  -5   4  126.09   12.80
  -2  -5   4   80.79    9.90
  -1  -5   4  123.19   12.90
   0  -5   4  508.85   21.60
   0  -5   4  534.65   21.90
   1  -5   4  166.18   12.60
   1  -5   4  161.38   12.80
   2  -5   4  119.49   12.30
  -3   5  -4  209.68   12.70
   3  -5   4  209.88   15.10
  -4   5  -4  157.88   12.30
   4  -5   4  187.58   14.90
  -5   5  -4   44.20   17.90
  -5   5  -4   32.80   10.90
   5  -5   4   44.90    7.80
  -6   5  -4   -4.60    9.20
  -6   5  -4   -2.00   13.20
  -7   5  -4   -3.80   11.00
   7  -5   4   10.70    7.40
  -8  -4   4    6.70    7.10
  -7  -4   4    5.70    8.20
  -7  -4   4   -3.90    7.60
  -6  -4   4  103.69   15.70
  -6  -4   4   89.69   12.00
   5   4  -4   43.20    9.80
  -5  -4   4   36.10    8.90
  -5  -4   4   43.20    8.70
  -2  -4   4  218.08   14.80
  -1  -4   4    9.80    5.80
  -1  -4   4   13.70    6.90
   0  -4   4   13.00    6.20
   0  -4   4   16.80    6.30
   1  -4   4    1.50    5.60
   1  -4   4    8.60    5.50
   2  -4   4  209.08   13.40
  -3   4  -4   24.20    5.40
   3  -4   4   25.20    6.80
  -4   4  -4  129.89   10.90
   4  -4   4  127.39   12.80
  -6   4  -4  119.49   18.90
  -6   4  -4  116.79   18.40
  -7   4  -4  -12.30   12.20
   7  -4   4    7.40    7.90
  -8   4  -4   14.10    9.00
   8  -4   4    6.10    6.00
  -8  -3   4    4.00    7.20
  -8  -3   4    1.40    6.10
  -7  -3   4   98.19   13.00
  -7  -3   4   76.79   11.10
  -6  -3   4   46.30    9.80
  -6  -3   4   36.30    9.40
   5   3  -4   35.00    9.30
  -5  -3   4   33.10    7.80
  -2  -3   4  241.68   14.40
  -1  -3   4  216.38   13.00
  -1  -3   4  209.98   11.40
   0  -3   4  372.06   15.40
   1  -3   4  227.68   11.90
   2  -3   4  274.27   13.20
  -3   3  -4  464.05   18.50
   3  -3   4  496.75   19.80
   4  -3   4   76.29    9.90
   5  -3   4   42.50    7.40
  -6   3  -4   65.09   10.90
  -6   3  -4   56.59   17.40
  -7   3  -4   89.19   15.50
   7  -3   4  100.29   12.40
  -8   3  -4   12.30    9.40
   8  -3   4   -0.40    6.00
  -8  -2   4   11.60    8.20
  -8  -2   4   19.40    7.00
  -7  -2   4   22.40    9.60
  -7  -2   4   28.30    8.70
  -6  -2   4  264.37   17.80
  -6  -2   4  237.68   17.10
  -6  -2   4  277.37   25.80
   5   2  -4  138.89   14.60
  -5  -2   4  118.09   13.90
  -2  -2   4  977.90   32.90
  -1  -2   4  207.98   10.70
   0  -2   4  261.27   11.30
   1  -2   4  216.18   10.10
   2  -2   4  944.01   31.80
   3  -2   4  129.69    9.50
   4  -2   4   12.10    5.10
   5  -2   4  106.09   10.20
  -6   2  -4  329.47   29.60
  -7   2  -4   23.20   13.20
   7  -2   4   12.00    8.10
  -8   2  -4   25.30   10.30
   8  -2   4   27.40    6.70
  -8  -1   4   56.19    9.60
   7   1  -4   53.99    8.20
  -7  -1   4   49.70   10.10
  -7  -1   4   41.10    8.80
   6   1  -4  187.88   13.10
  -6  -1   4  183.78   16.30
  -6  -1   4  155.08   15.30
   5   1  -4   -3.10    7.30
  -5  -1   4   14.80    7.30
   4   1  -4  134.89   12.20
  -2  -1   4  693.73   24.40
  -1  -1   4  736.73   24.80
   0  -1   4  614.84   20.30
   1  -1   4  556.84   18.40
   2  -1   4  582.44   20.10
   3  -1   4    9.80    4.50
   4  -1   4  104.19    8.90
   5  -1   4   -0.90    4.80
  -7   1  -4   67.59   14.60
   7  -1   4   58.29    9.30
   8  -1   4   37.70    6.90
   8   0  -4   -0.30    5.40
  -8   0   4   13.00    7.90
   7   0  -4   -7.80    6.60
  -7   0   4   -4.70    7.00
  -7   0   4    0.20   11.20
  -7   0   4    5.40    8.70
   6   0  -4   67.89    9.40
  -6   0   4   55.59    9.70
   5   0  -4  362.36   19.40
   4   0  -4    1.30    6.30
   3   0  -4  332.07   16.10
   2   0  -4    3.70   10.60
   2   0  -4   -9.70    9.60
  -2   0   4   -1.40   10.40
  -1   0   4  620.64   20.90
   0   0  -4 1167.78   37.20
   0   0   4 1036.50   36.70
  -1   0  -4  466.35   17.70
   2   0   4   -1.40    3.40
   3   0   4  272.07   12.00
   4   0   4    2.20    4.60
   5   0   4  299.07   14.20
   7   0   4   -6.70    6.90
   8   0   4  -10.40    5.70
   8  -1  -4   58.59    7.50
  -8   1   4   67.29    9.40
   7  -1  -4   75.39    9.40
  -7   1   4   65.49   10.10
  -7   1   4   52.89   10.60
   6  -1  -4  202.48   13.60
  -6   1   4  189.68   16.30
   5  -1  -4    3.70    6.40
   4  -1  -4  121.19   11.60
   3  -1  -4    8.70    4.30
   3  -1  -4   -8.00    5.70
   2  -1  -4  782.82   27.50
   1  -1  -4  669.93   22.80
   0  -1  -4  626.34   24.70
   0   1   4  610.14   24.20
  -2  -1  -4  695.23   28.40
   3   1   4   -2.00    4.10
   4   1   4  148.19    9.80
  -6  -1  -4  164.38   14.40
  -7  -1  -4   52.29   10.20
   8  -2  -4   12.50    6.20
  -8   2   4   22.60    7.70
   7  -2  -4   29.40    8.00
  -7   2   4   14.70    9.40
  -7   2   4   35.50   11.60
   6  -2  -4  274.27   15.70
  -6   2   4  302.17   22.70
  -6   2   4  285.97   21.50
   5  -2  -4  126.19   12.70
   4  -2  -4   14.90    6.40
   3  -2  -4  128.79    9.00
   3  -2  -4  150.28   11.10
   2  -2  -4 1005.80   33.80
   2  -2  -4 1041.40   34.80
   1  -2  -4  197.18    9.80
   0  -2  -4  254.37   18.80
   0   2   4  254.27   19.70
  -1  -2  -4  192.58   15.60
   4   2   4   17.10    9.60
  -5  -2  -4  136.29   12.90
  -6  -2  -4  282.17   18.10
  -6  -2  -4  288.07   18.80
  -7  -2  -4   34.40    9.40
   8  -3  -4    1.20    5.70
  -8   3   4    3.80    6.50
   7  -3  -4   91.59   12.10
  -7   3   4   98.49   14.40
  -7   3   4   88.29   12.10
   6  -3  -4   61.49    9.00
  -6   3   4   65.29   11.50
  -6   3   4   63.59   14.00
   5  -3  -4   24.30    7.70
   4  -3  -4   94.29   10.90
   3  -3  -4  467.65   18.10
   3  -3  -4  495.05   20.10
   2  -3  -4  246.38   12.60
   2  -3  -4  248.58   11.70
   1  -3  -4  210.78   10.70
   1  -3  -4  215.78   10.70
   0  -3  -4  321.97   12.90
   0  -3  -4  322.07   13.40
  -1  -3  -4  182.78   10.10
  -2  -3  -4  225.98   11.90
  -3  -3  -4  430.06   19.80
  -5  -3  -4   17.70    8.20
  -6  -3  -4   51.99   10.10
  -6  -3  -4   56.79   10.30
  -7  -3  -4   83.69   12.70
  -7  -3  -4   85.09   11.40
  -8  -3  -4    0.20    6.80
   8  -4  -4    8.30    5.50
  -8   4   4   10.80    6.30
   7  -4  -4   13.50    7.50
  -7   4   4    9.60    9.70
  -7   4   4   11.90   11.60
   6  -4  -4   86.99   12.40
  -6   4   4   93.49   15.60
  -6   4   4   86.99   12.60
   5  -4  -4   69.69    9.30
   4  -4  -4  127.39   12.20
   3  -4  -4   12.50    6.10
   3  -4  -4   21.70    5.80
   2  -4  -4  196.18   11.40
   2  -4  -4  195.98   11.90
   1  -4  -4   16.40    5.40
   1  -4  -4   12.10    5.10
   0  -4  -4   12.50    5.50
  -1  -4  -4    6.30    5.30
  -2  -4  -4  154.48   11.50
  -3  -4  -4   31.00    7.20
  -5  -4  -4   55.99    9.90
  -6  -4  -4   98.39   13.70
  -6  -4  -4  117.09   16.00
  -7  -4  -4   11.50    8.40
  -7  -4  -4   10.10    8.30
  -8  -4  -4   16.30    7.20
   7  -5  -4   20.10    6.90
  -7   5   4    8.40    9.80
   6  -5  -4    6.60    6.50
   6  -5  -4   -0.30    8.00
  -6   5   4    3.60   10.20
  -6   5   4    2.80   12.00
   5  -5  -4   59.39    9.60
   5  -5  -4   51.39    7.90
  -5   5   4   62.89   15.00
  -5   5   4   47.10   11.70
   4  -5  -4  139.39   13.70
   3  -5  -4  180.98   13.00
   2  -5  -4   96.39    9.80
   2  -5  -4  107.19   10.50
   1  -5  -4  147.59   11.40
   1  -5  -4  154.58   11.50
   0  -5  -4  527.95   21.20
  -1  -5  -4  131.49   11.70
  -2  -5  -4   88.39   11.10
  -3  -5  -4  191.98   15.00
  -4  -5  -4  161.98   14.20
  -5  -5  -4   32.50    9.00
  -5  -5  -4   42.50   10.00
  -6  -5  -4   17.70    8.90
  -6  -5  -4   -8.70    7.50
  -7  -5  -4   15.30    8.30
  -7  -5  -4   11.60    8.50
  -7   6   4   37.20    9.80
   6  -6  -4   80.89    9.20
  -6   6   4   55.39   13.20
  -6   6   4   30.80   12.50
   5  -6  -4   13.50    7.20
  -5   6   4    6.20   11.10
  -5   6   4    6.40   11.90
   4  -6  -4   31.10    7.50
   4  -6  -4   42.20   10.00
   3  -6  -4  421.56   21.30
   2  -6  -4  208.48   13.60
   2  -6  -4  207.38   14.80
   1  -6  -4   51.89    7.90
   0  -6  -4   28.20    7.80
  -1  -6  -4   63.99    8.90
  -2  -6  -4  191.08   14.70
  -3  -6  -4  400.26   21.30
  -3  -6  -4  402.86   21.70
  -4  -6  -4   30.10    9.30
  -4  -6  -4   19.30    9.30
  -5  -6  -4   16.50    8.90
  -5  -6  -4    5.20    9.50
  -6  -6  -4   54.19   10.90
  -6  -6  -4   59.09   11.00
  -7  -6  -4   23.80    7.70
  -7  -6  -4   25.10    8.80
  -7   7   4   44.90    9.00
   6  -7  -4    5.30    6.40
  -6   7   4  -10.90   11.40
   5  -7  -4   20.00    8.00
  -5   7   4   40.70   13.60
   4  -7  -4    2.00    8.50
   4  -7  -4   18.20    7.60
  -4   7   4   18.40   13.20
  -4   7   4    6.60    8.00
   3  -7  -4  151.68   16.90
   3  -7  -4  189.18   15.60
   3  -7  -4  168.58   14.50
   2  -7  -4   40.60    9.30
   1  -7  -4   40.30    9.60
   0  -7  -4  206.08   17.20
  -1  -7  -4   49.40    9.90
  -2  -7  -4   38.90   10.00
  -3  -7  -4  147.09   16.30
  -3  -7  -4  141.69   14.40
  -3  -7  -4  175.48   17.30
  -3  -7  -4  162.78   17.40
  -4  -7  -4   14.90    9.30
  -4  -7  -4   25.60    9.90
  -4  -7  -4   22.20    8.50
  -5  -7  -4    6.90    9.00
  -5  -7  -4   14.20    9.80
  -6  -7  -4    7.60    8.60
  -7  -7  -4   50.99    8.60
   6  -8  -4   23.60    6.50
  -6   8   4   10.30   13.50
   5  -8  -4    8.50    8.20
  -5   8   4    8.40   14.70
   4  -8  -4   98.29   15.30
   4  -8  -4   97.69   13.70
  -4   8   4   93.19   17.90
  -4   8   4  102.69   13.40
   3  -8  -4   18.60   13.40
   3  -8  -4   30.00    8.00
   3  -8  -4   22.20   10.90
   3  -8  -4   16.80    9.90
   2  -8  -4   30.60   13.80
   2  -8  -4   45.20   11.90
   2  -8  -4   56.29   11.10
   2  -8  -4   47.10    8.20
   2  -8  -4   43.90   11.60
   1  -8  -4   28.30   12.70
   1  -8  -4   22.90    9.70
   1  -8  -4   21.60   10.80
   1  -8  -4   24.60    8.90
   0  -8  -4   51.39   11.50
   0  -8  -4   61.39   11.20
   0  -8  -4   43.90   13.80
  -1  -8  -4   -1.10   10.10
  -1  -8  -4   34.90    9.30
  -1  -8  -4   12.50   11.10
  -2  -8  -4   47.80    9.60
  -2  -8  -4   10.20   11.20
  -2  -8  -4   47.30   11.60
  -3  -8  -4   40.20    9.20
  -3  -8  -4   42.20   12.20
  -3  -8  -4   16.60   10.20
  -4  -8  -4   79.49   10.70
  -4  -8  -4   89.29   12.70
  -5  -8  -4   12.00    9.10
  -6  -8  -4   12.40    8.40
   5  -9  -4  135.49   13.00
  -5   9   4  131.29   21.70
   4  -9  -4    6.90    7.90
   4  -9  -4    1.20    6.80
  -4   9   4   -4.00   19.20
   3  -9  -4   14.00   10.70
   3  -9  -4   23.30   14.60
   3  -9  -4   39.40    8.30
   3  -9  -4   33.80   11.20
  -3   9   4   21.80    9.60
   2  -9  -4   33.50   11.30
   2  -9  -4    1.90   12.90
   2  -9  -4   25.00   10.60
   1  -9  -4   61.49   10.00
   1  -9  -4   46.90   13.00
   1  -9  -4   43.10   13.50
   1  -9  -4   44.90   10.80
   1  -9  -4   49.30   12.80
   0  -9  -4   20.20    9.60
   0  -9  -4   16.20   12.20
   0  -9  -4   -2.80   10.30
   0  -9  -4   14.30   11.50
   0  -9  -4   29.80    9.50
  -1  -9  -4   53.99   12.90
  -1  -9  -4   58.39   10.40
  -1  -9  -4   61.09   14.00
  -1  -9  -4   45.20   11.20
  -2  -9  -4   14.50    9.20
  -2  -9  -4    3.90   15.00
  -2  -9  -4   10.60   10.90
  -3  -9  -4   40.60    9.40
  -3  -9  -4   22.80   10.80
  -4  -9  -4   21.20    8.30
  -4  -9  -4   -0.20    9.80
  -5  -9  -4   88.39   13.50
   5 -10  -4   31.00    5.80
  -5  10   4   26.50   16.10
   4 -10  -4   12.50    5.40
   4 -10  -4   12.60    6.70
  -4  10   4   16.10   20.20
   3 -10  -4   36.50    7.70
   3 -10  -4   18.90    8.90
   3 -10  -4   15.00    7.60
   2 -10  -4   -4.80   10.30
   2 -10  -4  -10.50   13.10
   2 -10  -4   13.20   10.60
   1 -10  -4   16.80   11.60
   1 -10  -4    5.60   13.20
   1 -10  -4   33.80   10.20
   0 -10  -4    4.20   11.20
   0 -10  -4  -12.00   11.00
   0 -10  -4   -0.80    8.40
   0 -10  -4   -0.20    8.40
  -1 -10  -4   11.90   10.90
  -1 -10  -4   28.00    9.50
  -1 -10  -4   30.10   10.90
  -2 -10  -4    3.00    9.80
  -2 -10  -4    7.50    8.60
  -3 -10  -4   20.20   10.30
  -3 -10  -4   24.70    8.50
  -4 -10  -4    1.80    7.90
  -4 -10  -4   13.40    7.50
  -5 -10  -4   11.20    7.40
   3 -11  -4    1.60    4.80
   2 -11  -4   13.80    7.80
   2 -11  -4   11.40    8.60
   1 -11  -4   26.50    8.80
   1 -11  -4    8.80   10.80
   1 -11  -4    6.40    5.00
   0 -11  -4  140.79   18.20
   0 -11  -4  116.69   12.40
   0 -11  -4  126.29   13.40
  -1 -11  -4   12.50    7.50
  -1 -11  -4   -1.30    8.60
  -1 -11  -4    2.50    6.70
  -2 -11  -4    6.70    8.30
  -2 -11  -4    9.90    7.00
  -3 -11  -4   -2.80    5.70
  -3 -11  -4    1.80    7.00
   1 -12  -4   15.30    6.00
   1 -12  -4   25.00    6.60
   0 -12  -4   24.20    6.10
   0 -12  -4   40.50    6.40
  -1 -12  -4   14.10    5.60
  -1 -12  -4   18.00    6.00
  -1 -12   5    6.30    6.70
   0 -12   5    4.10    6.30
   0 -12   5   -4.20    8.10
   1 -12   5    9.40    8.80
   1 -12   5    7.70    6.20
  -3 -11   5   15.80    5.60
  -2 -11   5   63.99    8.10
  -2 -11   5   74.39    9.30
  -1 -11   5   -3.40    6.50
  -1 -11   5   -3.60    8.50
   0 -11   5   84.29   12.50
   0 -11   5   98.19   13.20
   1 -11   5    2.50    8.20
   1 -11   5    4.30   14.30
   2 -11   5   77.89   10.40
   2 -11   5   57.19   12.70
  -3  11  -5   10.00   11.80
   3 -11   5    7.90    4.90
  -4 -10   5   22.20    7.40
  -4 -10   5   22.60    7.70
  -3 -10   5   15.90    8.00
  -3 -10   5   32.30    9.00
  -3 -10   5   16.70    7.20
  -2 -10   5    8.10    9.80
  -2 -10   5   -2.90    8.10
  -2 -10   5   -3.30    9.10
  -1 -10   5    4.90   11.60
  -1 -10   5    9.90    9.70
  -1 -10   5   19.30    8.60
   0 -10   5    1.00    8.60
   0 -10   5   11.60   10.20
   1 -10   5    5.60   11.20
   1 -10   5    8.80    9.60
   2 -10   5  -21.30   14.60
   2 -10   5    7.50   10.00
   3 -10   5   30.10    6.80
   3 -10   5   13.30    6.80
   3 -10   5   25.70   16.50
  -4  10  -5   66.69   19.30
   4 -10   5   14.20    5.20
   4 -10   5   29.70    6.50
  -5  10  -5   20.80   11.70
   5 -10   5    1.90    5.20
  -5  -9   5    3.20    6.80
  -5  -9   5   10.80    7.20
  -4  -9   5   18.40    8.20
  -4  -9   5   24.50    8.30
  -3  -9   5   52.49    9.30
  -3  -9   5   40.50   10.70
  -3  -9   5   42.20   11.20
  -2  -9   5   14.40   10.30
  -2  -9   5    1.70   10.00
  -2  -9   5    5.10    7.60
  -1  -9   5   53.69    9.60
  -1  -9   5   41.50    9.40
  -1  -9   5   41.10   11.40
  -1  -9   5   19.60   13.80
   0  -9   5  111.09   15.70
   0  -9   5   95.89   15.10
   0  -9   5   86.49   13.60
   0  -9   5  107.99   14.10
  -1   9  -5   55.49   10.20
   1  -9   5   54.59   10.90
   1  -9   5   65.19   12.60
  -2   9  -5   19.20    9.00
   2  -9   5   -9.50   11.20
   2  -9   5    0.40    6.20
   2  -9   5   -1.00    9.90
  -3   9  -5   43.10    9.40
   3  -9   5   59.59    8.70
   3  -9   5   67.19   11.60
   4  -9   5   30.10    8.20
   4  -9   5   12.10    6.40
  -5   9  -5    1.40   13.20
   5  -9   5    7.80    6.60
  -6  -8   5   48.20    9.10
  -5  -8   5   24.50    9.50
  -5  -8   5   15.50    8.00
  -5  -8   5   34.60    7.60
  -4  -8   5    2.20    7.40
  -4  -8   5   11.00    8.70
  -4  -8   5    7.80    9.40
  -4  -8   5    5.80    7.50
  -3  -8   5   20.80    8.40
  -3  -8   5    2.40    9.30
  -3  -8   5   12.00    7.40
  -2  -8   5   16.70    9.40
  -2  -8   5    8.70    7.10
  -2  -8   5   13.90    9.60
  -2  -8   5   12.40   12.90
  -1  -8   5   19.10    7.60
  -1  -8   5   36.60    9.40
  -1  -8   5   39.80   12.50
   0   8  -5   66.29    9.50
   0  -8   5   64.69   11.10
   0  -8   5   70.99   13.70
  -1   8  -5   43.00    8.60
   1  -8   5   42.00   10.20
  -2   8  -5   10.30    8.30
   2  -8   5   24.60    7.10
   2  -8   5   26.10    9.70
  -3   8  -5   18.80    9.00
   3  -8   5    5.50    9.20
   3  -8   5   13.50    7.30
  -4   8  -5    8.50    7.80
   4  -8   5    9.30    7.70
  -5   8  -5   20.50   13.10
   5  -8   5   25.30    8.20
  -6   8  -5   56.99   11.30
   6  -8   5   61.59    7.40
  -7  -7   5   12.50    7.50
  -6  -7   5    2.00    8.20
  -6  -7   5   14.60    7.70
  -5  -7   5   12.50    8.80
  -5  -7   5   15.80    7.50
  -5  -7   5   26.20    8.70
  -4  -7   5  131.79   16.70
  -4  -7   5  149.19   16.60
  -4  -7   5  162.28   16.00
  -3  -7   5   57.49   10.40
  -3  -7   5   50.59   10.90
  -2  -7   5  247.58   21.20
  -1  -7   5  151.98   17.60
   0   7  -5   24.00    7.00
   0  -7   5   41.50   11.20
  -1   7  -5  170.38   13.10
   1  -7   5  158.48   16.00
  -2   7  -5  256.77   15.20
   2  -7   5  229.08   17.80
  -3   7  -5   58.29    9.50
   3  -7   5   44.70    8.40
   3  -7   5   73.89   11.00
  -4   7  -5  163.08   15.00
   4  -7   5  190.08   14.80
  -5   7  -5   13.90   11.50
   5  -7   5    9.20    7.60
  -6   7  -5    2.30   10.50
  -6   7  -5   11.90   12.60
   6  -7   5    9.80    6.90
  -7  -6   5   28.30    8.80
  -7  -6   5    7.30    6.90
  -6  -6   5   23.60    8.60
  -6  -6   5   11.80    8.90
  -5  -6   5   53.19   14.00
  -5  -6   5   43.80   10.30
  -5  -6   5   60.29   10.60
  -4  -6   5   11.90    8.00
  -4  -6   5    3.90    8.20
  -3  -6   5  152.68   14.40
  -2  -6   5   37.90   10.30
  -1  -6   5   46.60   10.10
   0   6  -5  312.47   15.00
   0  -6   5  321.37   17.50
   0  -6   5  311.97   18.80
  -1   6  -5   51.39    7.40
   1  -6   5   67.29    9.40
   1  -6   5   54.29    9.10
  -2   6  -5   49.50    7.80
   2  -6   5   35.10    9.00
  -3   6  -5  148.19   12.90
   3  -6   5  161.88   15.60
  -4   6  -5    5.70    7.20
   4  -6   5    4.30    6.80
  -5   6  -5   68.39   12.60
  -5   6  -5   60.29   15.50
   5  -6   5   73.59    9.30
  -6   6  -5   36.90   11.10
  -6   6  -5   25.30   13.40
   6  -6   5   26.00    7.90
   6  -6   5   25.30    8.30
  -7   6  -5   20.20   10.70
   7  -6   5   22.70    6.90
  -7  -5   5   20.50    8.40
  -7  -5   5   36.80    9.10
  -6  -5   5   93.99   13.80
  -6  -5   5   70.19   11.60
  -5  -5   5   49.90    9.70
  -5  -5   5   66.19   10.30
  -5  -5   5   55.49    9.90
  -4  -5   5  137.89   14.20
  -2  -5   5  113.89   14.30
  -1  -5   5   36.00    8.20
  -1  -5   5   14.60    6.60
   0  -5   5    8.00    7.10
   0  -5   5   -7.40    6.10
   1  -5   5   29.80    7.00
   1  -5   5   17.40    6.90
  -2   5  -5  165.58   11.40
   2  -5   5  154.38   13.40
  -3   5  -5  113.19   10.70
   3  -5   5  115.89   13.60
  -4   5  -5  150.88   12.80
   4  -5   5  152.98   14.40
  -5   5  -5   87.19   18.80
  -5   5  -5   78.29   12.40
   5  -5   5   66.69    8.70
  -6   5  -5  105.89   17.30
  -6   5  -5  113.69   18.40
  -7   5  -5   21.80   11.90
   7  -5   5   33.50    7.90
  -8  -4   5   10.60    7.00
  -7  -4   5   44.00    9.70
  -7  -4   5   42.80    9.50
  -6  -4   5    0.30    8.20
  -6  -4   5   -1.80    8.10
  -5  -4   5   78.49   12.20
  -5  -4   5   92.39   13.00
  -2  -4   5   96.79   13.10
  -1  -4   5   -2.40    5.60
  -1  -4   5    7.80    6.90
   0  -4   5  101.59   10.40
   0  -4   5  100.09   10.50
   1  -4   5   -4.40    5.50
   1  -4   5    3.30    6.00
  -2   4  -5   90.79    9.20
   2  -4   5  118.19   11.30
  -3   4  -5  170.28   11.50
   3  -4   5  171.18   13.40
  -4   4  -5    1.40    5.60
   4  -4   5    9.90    6.90
  -6   4  -5   -8.80    8.40
  -6   4  -5   16.50   15.90
  -7   4  -5   27.30   13.90
   7  -4   5   42.40    8.80
  -8   4  -5   -0.40    8.70
   8  -4   5   -0.60    5.70
  -8  -3   5   22.00    7.80
  -8  -3   5    9.90    6.50
  -7  -3   5   56.99   10.70
  -7  -3   5   42.80    9.90
  -6  -3   5   23.40    9.10
  -6  -3   5   13.70    8.10
   5   3  -5   51.49   10.10
  -5  -3   5   45.60    8.70
  -2  -3   5  144.89   10.70
  -2  -3   5  135.39   12.60
  -1  -3   5  267.27   13.00
  -1  -3   5  256.77   14.30
   0  -3   5   40.60    6.20
   1  -3   5  252.77   12.60
  -2   3  -5  122.39    8.80
   2  -3   5  149.99   10.10
  -3   3  -5  144.69    9.60
   3  -3   5  141.79   11.10
   4  -3   5   40.50    6.80
   5  -3   5   59.89    8.20
  -6   3  -5   50.59   17.70
  -7   3  -5   49.70   14.70
   7  -3   5   70.39    9.80
  -8   3  -5   26.50   10.30
   8  -3   5   22.70    6.80
  -8  -2   5    8.90    6.30
  -8  -2   5   19.30    8.40
  -7  -2   5   38.10   10.30
  -7  -2   5   46.90    9.20
  -6  -2   5    1.00    7.50
  -6  -2   5   -1.90    7.40
  -6  -2   5    6.70    7.60
   5   2  -5  136.69   15.00
  -5  -2   5  104.99   13.00
  -2  -2   5  252.47   12.10
  -1  -2   5   72.69    8.10
   0  -2   5  903.31   30.00
   1  -2   5   69.99    7.00
   2  -2   5  270.97   12.30
   3  -2   5  105.29    8.30
   4  -2   5  171.38   11.00
   5  -2   5  105.39   10.00
  -6   2  -5    4.80   16.20
  -7   2  -5   60.49   15.30
  -8   2  -5    2.30    9.10
   8  -2   5    9.50    6.40
  -8  -1   5   23.90    8.40
  -8  -1   5   13.60    6.80
   7   1  -5   74.99   10.50
  -7  -1   5   71.09   10.10
  -7  -1   5   71.29   11.10
   6   1  -5   71.09    8.90
  -6  -1   5   66.29   10.80
  -6  -1   5   61.29   10.20
   5   1  -5   31.80    8.60
  -5  -1   5   15.50    7.50
   4   1  -5   85.69   11.30
  -3  -1   5  295.97   27.00
  -2  -1   5   34.90    5.50
  -1  -1   5 3213.78  100.29
   0  -1   5   -4.40    3.10
   1  -1   5 2518.15   78.39
   2  -1   5   24.70    4.10
   3  -1   5  231.78   10.90
   4  -1   5   54.89    8.10
   5  -1   5   16.50    5.20
  -7   1  -5   76.99   15.80
   7  -1   5   74.29    9.70
   8  -1   5   23.10    6.50
   8   0  -5   -4.00    5.60
  -8   0   5    0.90    7.30
   7   0  -5    0.20    6.60
  -7   0   5   -4.80    7.80
  -7   0   5   -6.40    8.50
  -7   0   5    2.70    7.70
   6   0  -5   19.40    7.90
  -6   0   5   25.50    8.50
   5   0  -5  201.28   15.50
   4   0  -5   25.80    7.60
   3   0  -5  924.51   33.20
  -2   0   5  170.58   10.20
  -1   0   5   49.20    5.70
   0   0  -5   -3.10    5.20
   0   0   5    0.00    5.30
   2   0   5  116.19    6.50
   3   0   5  755.12   25.70
   4   0   5   28.00    5.00
   7   0   5    5.10    7.60
   8   0   5    2.20    5.70
   8  -1  -5   19.10    6.00
  -8   1   5   24.30    8.00
   7  -1  -5   72.89    9.40
  -7   1   5   79.19   11.40
  -7   1   5   57.99   10.30
   6  -1  -5   57.69    8.90
  -6   1   5   59.39   12.20
  -6   1   5   55.89    9.80
   5  -1  -5   19.50    7.40
   4  -1  -5   69.89   10.70
   3  -1  -5  306.17   15.30
   3  -1  -5  284.17   12.90
   2  -1  -5   43.80    6.50
   1  -1  -5 2909.81   91.09
   0  -1  -5    2.00    7.20
   2   1   5   34.90    4.80
   3   1   5  242.98   10.60
   4   1   5   56.59    7.50
   8  -2  -5   11.40    6.10
  -8   2   5   10.20    7.20
   7  -2  -5   34.90    8.20
  -7   2   5   46.90   10.60
  -7   2   5   45.30   11.60
   6  -2  -5   -6.10    6.70
  -6   2   5   -0.70   10.70
  -6   2   5   16.00    9.20
   5  -2  -5  115.79   12.00
  -5   2   5  111.79   12.40
   4  -2  -5  182.68   13.30
   3  -2  -5  114.09    8.70
   3  -2  -5  102.99   10.80
   2  -2  -5  311.87   14.10
   2  -2  -5  293.77   12.90
   1  -2  -5   79.29    7.30
   0  -2  -5  882.71   36.80
   0   2   5  942.01   37.80
  -1  -2  -5   68.29   12.60
   3   2   5  101.09    7.30
  -5  -2  -5  120.09   12.70
  -6  -2  -5   -8.00    7.30
  -7  -2  -5   37.50    9.80
   8  -3  -5   22.80    6.20
  -8   3   5   30.90    7.60
   7  -3  -5   58.09    9.00
  -7   3   5   34.00   11.80
  -7   3   5   68.99   11.40
   6  -3  -5   29.20    8.00
  -6   3   5   11.30    9.40
  -6   3   5    9.30   11.80
   5  -3  -5   52.59    8.50
   4  -3  -5   40.00    7.20
   3  -3  -5  150.48   11.20
   3  -3  -5  120.49    8.90
   2  -3  -5  134.99    8.70
   2  -3  -5  137.09    9.90
   1  -3  -5  273.97   11.90
   1  -3  -5  229.08   11.60
   0  -3  -5   34.60    4.70
   0  -3  -5   39.50    5.20
  -1  -3  -5  221.38   10.80
  -2  -3  -5   95.99    9.00
  -5  -3  -5   63.69    9.60
  -6  -3  -5   12.60    8.40
  -6  -3  -5   14.40    8.80
  -7  -3  -5   63.19   10.00
   8  -4  -5   13.20    5.70
  -8   4   5   19.00    6.80
   7  -4  -5   57.39    8.90
  -7   4   5   33.20   12.40
  -7   4   5   52.79   11.60
   6  -4  -5   -4.70    7.60
  -6   4   5  -14.20   11.40
  -6   4   5   -3.00    9.10
   5  -4  -5  118.89   11.30
   5  -4  -5   97.49   13.90
   4  -4  -5    7.10    6.20
   3  -4  -5  166.38   12.80
   3  -4  -5  163.18   10.90
   2  -4  -5   84.89    8.40
   2  -4  -5  102.59    8.80
   1  -4  -5   -2.80    5.00
   1  -4  -5    0.60    4.60
   0  -4  -5   98.89    9.50
  -1  -4  -5   14.00    5.60
  -2  -4  -5   97.79   10.40
  -3  -4  -5  145.69   12.50
  -5  -4  -5  103.69   14.80
  -5  -4  -5  133.09   18.20
  -6  -4  -5   -1.30    8.30
  -6  -4  -5    9.20    7.90
  -7  -4  -5   16.90    8.50
  -7  -4  -5   40.70    9.40
  -8  -4  -5    5.90    6.90
   7  -5  -5   35.10    7.20
  -7   5   5   39.40   10.70
   6  -5  -5  122.39   12.50
   6  -5  -5  119.99   13.10
  -6   5   5  109.59   14.70
  -6   5   5  149.99   20.10
   5  -5  -5   73.09    8.90
  -5   5   5   58.69   12.50
  -5   5   5   71.79   15.40
   4  -5  -5  149.88   13.60
   3  -5  -5  124.99   11.70
   3  -5  -5  124.69   11.50
   2  -5  -5  155.78   11.70
   2  -5  -5  155.68   11.10
   1  -5  -5   16.50    6.40
   0  -5  -5   13.00    6.30
  -1  -5  -5   10.40    6.60
  -2  -5  -5  148.59   12.80
  -3  -5  -5  116.39   13.50
  -4  -5  -5  139.49   14.60
  -5  -5  -5   48.50   10.60
  -5  -5  -5   68.29   10.10
  -6  -5  -5  122.69   14.80
  -6  -5  -5  100.59   13.00
  -7  -5  -5   37.90    9.30
  -7  -5  -5   29.30    8.60
  -7   6   5   19.90    9.60
   6  -6  -5   33.90    7.50
  -6   6   5   28.30   12.20
   5  -6  -5   81.39    9.30
  -5   6   5   44.70   13.20
  -5   6   5   82.19   13.90
   4  -6  -5    9.50    6.80
   4  -6  -5    8.80    8.60
   3  -6  -5  142.69   13.50
   2  -6  -5   35.40    7.90
   1  -6  -5   59.59    8.40
   0  -6  -5  311.37   17.10
  -1  -6  -5   70.49    9.40
  -2  -6  -5   44.30    8.80
  -3  -6  -5  154.98   16.10
  -3  -6  -5  162.98   15.30
  -4  -6  -5   21.60    8.70
  -4  -6  -5   14.40    9.20
  -5  -6  -5   46.30   10.30
  -5  -6  -5   68.99   12.10
  -6  -6  -5   20.90    9.30
  -6  -6  -5   16.30    9.70
  -7  -6  -5   31.90    9.20
  -7   7   5    5.40    7.90
   6  -7  -5   24.70    7.00
  -6   7   5   26.40   13.20
   5  -7  -5   13.10    7.60
  -5   7   5   12.60   12.40
   4  -7  -5  177.68   14.60
   4  -7  -5  162.98   16.40
  -4   7   5  176.48   26.60
  -4   7   5  214.58   16.20
   3  -7  -5   57.29   11.00
   3  -7  -5   77.69   11.90
   3  -7  -5   53.59    8.70
   2  -7  -5  285.17   18.30
   1  -7  -5  187.08   15.80
   0  -7  -5   22.10    8.60
  -1  -7  -5  183.48   15.80
  -2  -7  -5  212.48   17.30
  -3  -7  -5   34.00   10.10
  -3  -7  -5   56.09   11.30
  -3  -7  -5   44.10    9.50
  -4  -7  -5  162.58   16.70
  -4  -7  -5  168.98   17.90
  -5  -7  -5   39.80   10.50
  -5  -7  -5   27.30   10.00
  -6  -7  -5   27.10    9.60
  -7  -7  -5   15.10    7.40
   6  -8  -5   76.09   10.20
  -6   8   5   73.99   15.40
   5  -8  -5   22.50    8.40
  -5   8   5   34.50   16.40
   4  -8  -5   11.20    9.40
   4  -8  -5   13.40    8.00
  -4   8   5   19.60    8.40
  -4   8   5  -13.60   14.60
   3  -8  -5   25.00   10.70
   3  -8  -5    0.00   10.10
   3  -8  -5   24.50    8.00
   3  -8  -5   -1.30   12.60
   2  -8  -5   33.20   11.70
   2  -8  -5   18.10    7.40
   2  -8  -5   21.10   11.90
   2  -8  -5    9.90    9.40
   2  -8  -5   17.50   10.30
   1  -8  -5   43.90   13.30
   1  -8  -5   36.20   10.40
   1  -8  -5   30.90   10.90
   1  -8  -5   46.80    9.20
   0  -8  -5   67.99   18.50
   0  -8  -5   61.19   12.10
   0  -8  -5   55.59   10.10
   0  -8  -5   53.29   10.50
  -1  -8  -5   39.00   12.00
  -1  -8  -5   41.50    9.80
  -1  -8  -5   32.50   11.00
  -2  -8  -5   10.30   10.90
  -2  -8  -5   14.00    8.90
  -2  -8  -5   24.70   11.10
  -3  -8  -5   25.40    8.90
  -3  -8  -5    9.40    9.90
  -3  -8  -5    7.40   10.60
  -4  -8  -5    3.80    8.00
  -4  -8  -5   14.80    9.40
  -5  -8  -5   30.60    9.50
  -6  -8  -5   51.29    9.50
   5  -9  -5   19.70    7.20
  -5   9   5   19.60   18.30
   4  -9  -5   17.10    7.40
   4  -9  -5   33.00    8.70
  -4   9   5   65.99   20.60
   3  -9  -5   61.79   15.50
   3  -9  -5   53.99    8.90
   3  -9  -5   75.59   12.80
   3  -9  -5   88.19   13.00
  -3   9   5   58.39   11.20
   2  -9  -5   22.00   13.40
   2  -9  -5   17.00   10.30
   2  -9  -5   16.20   10.60
   1  -9  -5   47.90   12.50
   1  -9  -5   46.40   13.40
   1  -9  -5   40.20   13.40
   1  -9  -5   46.40    9.70
   1  -9  -5   48.30   11.10
   0  -9  -5   93.79   14.70
   0  -9  -5   95.19   13.70
   0  -9  -5  107.39   14.90
   0  -9  -5  109.89   12.20
   0  -9  -5  122.49   19.10
  -1  -9  -5   50.39   10.40
  -1  -9  -5   59.69   11.60
  -1  -9  -5   76.89   14.20
  -1  -9  -5   98.99   15.10
  -2  -9  -5    0.30    8.60
  -2  -9  -5   11.10   10.70
  -3  -9  -5   67.29   10.50
  -3  -9  -5   54.49   11.90
  -4  -9  -5   38.20    8.90
  -4  -9  -5   30.20   10.40
  -5  -9  -5   22.40    9.30
   5 -10  -5   14.60    5.40
  -5  10   5    7.80    9.30
   4 -10  -5   11.90    5.40
   4 -10  -5   31.90    6.90
  -4  10   5   28.40   21.90
   3 -10  -5   22.80    7.30
   3 -10  -5    8.30    8.10
   3 -10  -5   14.50    7.80
   2 -10  -5  -18.90    9.30
   2 -10  -5   27.80   13.90
   2 -10  -5    4.90   10.30
   1 -10  -5    7.70    8.80
   1 -10  -5    0.80   12.40
   1 -10  -5   10.30   11.80
   1 -10  -5    2.80    9.50
   0 -10  -5    8.10   12.00
   0 -10  -5   14.30    8.60
   0 -10  -5   -2.20    8.50
   0 -10  -5    4.40   11.40
  -1 -10  -5   14.50   10.70
  -1 -10  -5    3.90    8.90
  -1 -10  -5    4.00   10.60
  -2 -10  -5   12.60    8.90
  -2 -10  -5    1.90   10.00
  -3 -10  -5   16.90    8.20
  -3 -10  -5   20.00   10.10
  -4 -10  -5   21.70    7.80
  -4 -10  -5   17.10    8.50
  -5 -10  -5   11.50    7.30
   3 -11  -5    3.20    4.80
   2 -11  -5   44.60    9.00
   2 -11  -5   85.39   10.80
   1 -11  -5   -2.00    8.10
   1 -11  -5   -3.50   10.70
   1 -11  -5    1.20    5.30
   0 -11  -5  114.19   16.70
   0 -11  -5   88.29   13.10
  -1 -11  -5    5.30    6.50
  -1 -11  -5    1.80    7.30
  -2 -11  -5   85.79   11.40
  -3 -11  -5    8.90    5.90
  -3 -11  -5    4.50    5.60
   1 -12  -5    7.10    5.70
   0 -12  -5    3.90    5.50
   0 -12  -5   -5.90    5.00
  -1 -12  -5    3.60    5.20
  -1 -12  -5    1.00    5.60
  -1 -12   6    2.40    6.70
   0 -12   6    0.40    8.50
   0 -12   6   -4.10    6.70
   1 -12   6   -6.90    8.40
   1 -12   6    5.60    6.30
  -3 -11   6    7.60    5.30
  -2 -11   6    8.50    6.50
  -2 -11   6   10.50    7.60
  -1 -11   6   32.20    9.50
  -1 -11   6   45.40    7.80
   0 -11   6  115.19   19.00
   0 -11   6  105.99   12.30
   1 -11   6   62.69   14.70
   1 -11   6   48.70    9.90
   2 -11   6   26.20   11.70
   2 -11   6    6.90    6.40
  -3  11  -6   -8.10   18.00
   3 -11   6  -10.10    9.50
   3 -11   6    2.50    4.70
  -4 -10   6    2.10    6.80
  -4 -10   6    5.80    6.60
  -3 -10   6    9.50    6.50
  -3 -10   6   51.49    8.80
  -3 -10   6   45.40    9.60
  -2 -10   6   11.90    9.80
  -2 -10   6   24.30    8.50
  -1 -10   6   10.20    8.00
  -1 -10   6   17.60    8.00
  -1 -10   6   11.70   10.30
   0 -10   6   72.79   10.80
   0 -10   6   68.69   12.40
   1 -10   6    1.50   11.20
   1 -10   6   14.30    9.90
   2 -10   6   20.80   10.40
   2 -10   6   42.00   16.50
   3 -10   6   40.80   17.30
   3 -10   6   35.70    6.90
   3 -10   6   17.10    6.80
  -4  10  -6    3.00   17.30
   4 -10   6  -14.50    5.40
   4 -10   6   -3.20    4.40
  -5  10  -6   11.50   10.70
  -5  -9   6   32.40    7.40
  -5  -9   6   52.09    8.50
  -4  -9   6  103.69   11.20
  -4  -9   6   71.59   10.80
  -4  -9   6  102.29   12.70
  -3  -9   6   34.20    9.50
  -3  -9   6   52.89    8.90
  -3  -9   6   53.39   11.80
  -2  -9   6   37.30   10.60
  -2  -9   6   61.29   13.70
  -2  -9   6   58.09    8.80
  -1  -9   6   12.10   14.10
  -1  -9   6   18.00    8.60
  -1  -9   6   22.30    8.50
  -1  -9   6   28.30   10.90
   0  -9   6    3.70   13.50
   0  -9   6   14.20    8.50
   0  -9   6   -2.50   10.30
  -1   9  -6   36.60    9.10
   1  -9   6   16.90    9.20
   1  -9   6    8.10   10.50
  -2   9  -6   52.19    9.90
   2  -9   6   54.89    7.70
   2  -9   6   53.09   13.20
   2  -9   6   70.39   12.30
  -3   9  -6   48.20   10.60
   3  -9   6   60.39   10.90
   3  -9   6   49.40    8.10
   4  -9   6  126.79   13.20
  -5   9  -6   49.00   13.90
   5  -9   6   42.50    7.40
  -6  -8   6   -1.40    7.30
  -5  -8   6   -2.20    7.10
  -5  -8   6   16.80    7.10
  -5  -8   6    1.80    8.70
  -4  -8   6    5.20    8.40
  -4  -8   6   11.70    7.70
  -4  -8   6   15.20    9.50
  -4  -8   6    0.10    7.40
  -3  -8   6   75.09   10.50
  -3  -8   6   77.49    9.70
  -3  -8   6  116.59   16.50
  -2  -8   6  119.59   15.80
  -2  -8   6   97.39   12.10
  -2  -8   6   73.69   15.10
  -2  -8   6   99.49   12.40
  -1  -8   6   27.70   13.40
  -1  -8   6   31.50    7.70
  -1  -8   6   12.40    8.50
   0   8  -6   27.30    8.50
   0  -8   6   28.40   13.00
   0  -8   6   48.50   10.50
  -1   8  -6   11.90    7.90
   1  -8   6   25.50    9.40
  -2   8  -6  102.39   13.50
   2  -8   6  117.59   12.50
   2  -8   6  118.99   15.50
   3  -8   6  119.09   16.30
   3  -8   6  133.09   13.20
  -4   8  -6    8.00    7.60
   4  -8   6    5.30    7.80
  -5   8  -6    4.50   12.90
   5  -8   6   12.00    7.50
  -6   8  -6    2.40    9.70
   6  -8   6   -7.30    5.50
  -7  -7   6    7.60    7.10
  -6  -7   6    0.40    7.30
  -6  -7   6   14.30    8.40
  -5  -7   6   15.90    9.00
  -5  -7   6   17.50    8.50
  -5  -7   6    8.20    7.50
  -4  -7   6   -0.10    8.00
  -4  -7   6   19.80    9.20
  -4  -7   6    9.90    8.80
  -3  -7   6   29.20   10.00
  -3  -7   6   23.70    9.70
  -2  -7   6   42.00   11.90
  -1  -7   6   14.30   10.70
   0   7  -6   18.30    6.80
   0  -7   6    8.40   11.10
  -1   7  -6    2.50    6.20
   1  -7   6   12.30    8.40
  -2   7  -6   50.89    8.70
   2  -7   6   69.29   10.70
  -3   7  -6   32.30    8.40
   3  -7   6   23.30    8.00
   3  -7   6   24.40    9.20
  -4   7  -6    9.80    7.70
   4  -7   6    3.80    7.00
  -5   7  -6   10.40   11.30
   5  -7   6    0.40    7.30
  -6   7  -6   11.60   12.50
  -6   7  -6   24.90   11.00
   6  -7   6   20.40    7.10
  -7  -6   6   22.70    7.40
  -7  -6   6   12.30    8.00
  -6  -6   6   22.80    9.10
  -6  -6   6   13.00    7.60
  -5  -6   6    4.60    8.60
  -5  -6   6   -5.80    7.60
  -5  -6   6   -0.30    7.50
  -4  -6   6   88.29   13.40
  -4  -6   6  106.59   14.40
  -3  -6   6   -2.60    7.30
  -2  -6   6   95.89   11.80
  -1  -6   6   25.70    9.40
   0   6  -6   31.40    6.60
   0  -6   6   33.90    9.60
   0  -6   6   33.10    8.10
  -1   6  -6   34.40    6.90
   1  -6   6   34.00    8.90
   1  -6   6   22.10    9.30
  -2   6  -6  111.89   10.80
   2  -6   6   91.19   13.50
  -3   6  -6   12.70    7.00
   3  -6   6   15.50    8.90
  -4   6  -6  124.39   13.20
   4  -6   6  112.89   13.30
  -5   6  -6  -20.50   13.10
  -5   6  -6   -5.20    9.70
   5  -6   6    5.30    7.00
  -6   6  -6   14.10   10.30
  -6   6  -6   17.80   13.30
   6  -6   6   22.30    7.70
  -7   6  -6   16.50   10.60
   7  -6   6   34.20    7.20
  -7  -5   6   -1.10    7.30
  -7  -5   6    3.50    7.90
  -6  -5   6   80.69   11.90
  -6  -5   6   55.99   11.10
  -5  -5   6   12.50    8.30
  -5  -5   6    1.70    8.00
  -5  -5   6   11.60    7.90
  -4  -5   6   51.39    9.10
  -2  -5   6  212.08   16.60
  -1  -5   6  112.89   11.20
  -1  -5   6  115.79   13.60
   0   5  -6   93.09    9.20
   0  -5   6   72.49   10.90
   0  -5   6  107.09   12.70
  -1   5  -6  131.79   10.30
   1  -5   6  143.59   12.20
   1  -5   6  145.99   12.60
  -2   5  -6  248.68   13.40
   2  -5   6  245.08   15.70
  -3   5  -6  201.18   12.90
   3  -5   6  189.08   14.70
  -4   5  -6   63.89    8.40
   4  -5   6   53.49    9.80
  -5   5  -6   13.90   16.70
  -5   5  -6   14.00    9.90
   5  -5   6   14.40    6.70
  -6   5  -6   71.79   11.60
  -6   5  -6   75.89   16.10
  -7   5  -6    1.70   11.80
   7  -5   6   -4.00    7.00
  -8  -4   6   21.50    7.80
  -7  -4   6   37.50    9.40
  -7  -4   6   28.70    9.20
  -6  -4   6   46.10   10.10
  -6  -4   6   32.40    9.80
  -5  -4   6   80.09   10.70
  -5  -4   6   86.09   13.00
  -4  -4   6  128.09   12.00
  -2  -4   6   92.49   13.10
  -1  -4   6   41.50    8.10
  -1  -4   6   15.30    5.80
   0  -4   6  157.58   11.70
   0  -4   6  163.98   11.50
  -1   4  -6   25.10    5.60
   1  -4   6   30.80    6.10
   1  -4   6   17.40    5.90
  -2   4  -6  116.99    9.20
   2  -4   6  126.79   11.60
  -3   4  -6  130.89   10.40
   3  -4   6  139.39   12.20
  -4   4  -6  164.88   11.00
   4  -4   6  132.09   13.60
  -6   4  -6   40.70   10.30
  -6   4  -6   36.60   17.00
  -7   4  -6   22.40   14.30
   7  -4   6   28.60    8.50
  -8   4  -6   32.30    9.70
   8  -4   6   20.80    5.90
  -8  -3   6   12.70    6.60
  -8  -3   6   24.30    7.80
  -7  -3   6   30.80    9.20
  -7  -3   6   44.30   10.30
  -6  -3   6  260.37   17.90
  -6  -3   6  213.28   17.60
  -6  -3   6  223.18   17.00
   5   3  -6   65.39   10.80
  -5  -3   6   60.79    9.50
  -2  -3   6   98.39   10.00
  -1  -3   6   32.60    7.40
  -1  -3   6   24.20    5.50
   0  -3   6  183.48   11.00
   1  -3   6   46.40    6.30
  -2   3  -6  100.19    8.40
   2  -3   6  100.39    9.80
  -3   3  -6  919.31   31.90
   3  -3   6  935.31   33.00
   4  -3   6   80.49   10.20
   5  -3   6   68.29    8.40
  -6   3  -6  303.67   31.40
  -7   3  -6   32.60   14.70
  -8   3  -6   24.60    9.90
   8  -3   6   19.00    6.50
  -8  -2   6   61.19    9.90
  -8  -2   6   31.90    7.40
  -7  -2   6   30.70   10.10
  -7  -2   6   36.80    8.90
  -6  -2   6   62.59   10.40
  -6  -2   6   59.69    9.70
  -6  -2   6   50.49    9.90
   5   2  -6   51.89   10.30
  -5  -2   6   49.99    8.90
  -2  -2   6  102.59    9.00
  -1  -2   6  140.09    9.80
   0  -2   6  474.25   17.60
   1  -2   6  118.09    8.10
   2  -2   6  103.09    8.40
  -3   2  -6  118.49    8.00
   3  -2   6  125.69    8.70
   4  -2   6    3.60    4.90
   5  -2   6   50.99    7.20
  -6   2  -6   36.10   17.80
  -7   2  -6   25.60   14.00
  -8   2  -6   72.99   11.20
   8  -2   6   58.09    7.70
  -8  -1   6   45.30    9.40
  -8  -1   6   20.10    6.70
   7   1  -6   24.40    7.20
  -7  -1   6   15.20    8.20
  -7  -1   6   32.40    9.30
  -7  -1   6   41.90   10.10
   6   1  -6   22.60    7.60
  -6  -1   6   35.60    9.30
  -6  -1   6   24.90    9.10
  -6  -1   6   25.60    9.00
   5   1  -6   70.29   10.70
  -5  -1   6   78.79   10.30
   4   1  -6   37.40    7.90
  -3  -1   6  182.68   23.70
  -2  -1   6  231.38   11.70
  -1  -1   6  186.18   10.10
   0  -1   6  610.64   20.40
   1  -1   6  158.68    7.60
   2  -1   6  195.28    8.90
   3  -1   6  155.48    8.80
   4  -1   6   26.20    5.10
   5  -1   6   78.39   10.90
  -7   1  -6   44.10   14.30
   8  -1   6   47.20    7.10
   8   0  -6   11.30    6.10
  -8   0   6   25.00    8.50
   7   0  -6   -1.10    6.60
  -7   0   6    4.30    7.40
  -7   0   6   11.10    8.40
  -7   0   6    5.70    9.00
   6   0  -6  180.38   13.50
  -6   0   6  170.18   16.00
   5   0  -6  268.77   17.00
  -5   0   6  256.27   16.80
   4   0  -6  118.99   13.30
   3   0  -6  164.28   12.10
  -2   0   6   17.60    4.90
  -1   0   6 1342.27   42.90
   0   0   6  317.47   11.20
   2   0   6   19.80    3.10
   3   0   6  137.79    7.80
   4   0   6   98.09    8.10
   7   0   6   -9.50    7.20
   8   0   6   15.50    6.00
   8  -1  -6   40.30    6.80
  -8   1   6   48.20    8.90
   7  -1  -6   36.20    8.20
  -7   1   6   30.60    9.70
  -7   1   6   28.10   10.20
  -7   1   6   42.30    9.80
   6  -1  -6   22.80    7.60
  -6   1   6   24.50    9.40
  -6   1   6   11.30    7.90
   5  -1  -6   66.79    9.50
  -5   1   6   74.69    9.80
   4  -1  -6   34.60    8.00
   3  -1  -6  209.18   13.20
   3  -1  -6  182.48   11.00
   2  -1  -6  222.78   12.40
   2  -1  -6  232.88   10.90
   1  -1  -6  176.18    9.50
   0  -1  -6  649.64   27.60
   2   1   6  173.58    7.00
   3   1   6  159.68    8.10
   8  -2  -6   79.79    8.80
  -8   2   6   68.19   10.40
   7  -2  -6   54.09    8.80
  -7   2   6   18.40   10.60
  -7   2   6   49.30   10.60
   6  -2  -6   93.99   11.50
  -6   2   6   88.09   14.40
  -6   2   6   68.89   11.60
   5  -2  -6   35.70    8.10
  -5   2   6   52.69    8.30
   4  -2  -6   12.30    6.50
   3  -2  -6  112.69    8.70
   3  -2  -6  125.79   11.30
   2  -2  -6  113.49    9.80
   2  -2  -6  118.69    9.20
   1  -2  -6  126.19    8.30
   0  -2  -6  447.16   24.30
   0   2   6  433.86   24.50
  -1  -2  -6  105.09   12.80
  -5  -2  -6   34.20    8.30
  -6  -2  -6   73.49   10.90
   8  -3  -6   20.80    6.10
  -8   3   6   11.50    7.40
  -8   3   6   24.30    7.30
   7  -3  -6   52.99    8.90
  -7   3   6   34.00   10.40
  -7   3   6   16.90   11.20
   6  -3  -6  263.37   15.80
  -6   3   6  288.47   21.70
  -6   3   6  257.27   23.50
   5  -3  -6   65.59    9.30
   4  -3  -6   82.59   10.90
   3  -3  -6  961.30   34.20
   3  -3  -6  935.51   32.30
   2  -3  -6  100.69    7.90
   2  -3  -6   78.89    9.00
   1  -3  -6   27.60    5.10
   1  -3  -6   26.90    5.00
   0  -3  -6  157.18    8.60
   0  -3  -6  177.58    9.50
  -1  -3  -6   27.80    5.10
  -2  -3  -6   95.79    8.40
  -5  -3  -6   75.99   10.30
  -6  -3  -6  228.08   18.10
  -6  -3  -6  222.78   16.70
  -7  -3  -6   22.20    8.70
   8  -4  -6   39.00    6.30
  -8   4   6   37.70    7.30
  -8   4   6   30.00    6.60
   7  -4  -6   36.40    8.00
  -7   4   6   41.60   11.00
   6  -4  -6   67.39    9.10
  -6   4   6   52.39   13.60
  -6   4   6   57.79   11.70
   5  -4  -6   78.09    8.40
   5  -4  -6   69.69    9.10
   4  -4  -6  142.49   13.00
   3  -4  -6  144.19   12.00
   3  -4  -6  125.39   10.40
   2  -4  -6  117.09   10.30
   2  -4  -6  119.29   10.00
   1  -4  -6   26.30    5.30
   1  -4  -6   19.00    5.60
   0  -4  -6  136.39   10.30
   0  -4  -6  140.19    9.60
  -1  -4  -6   13.20    5.50
  -2  -4  -6   81.79   10.10
  -3  -4  -6  118.29   16.10
  -4  -4  -6  152.08   17.80
  -5  -4  -6   64.09   10.50
  -5  -4  -6   72.59   11.10
  -6  -4  -6   32.30    9.00
  -6  -4  -6   30.30   10.00
  -7  -4  -6   19.70    8.50
  -7  -4  -6   10.20    8.10
   7  -5  -6    0.30    6.20
  -7   5   6    0.50    9.60
   6  -5  -6   93.79   11.70
   6  -5  -6   99.19   12.30
  -6   5   6   77.09   14.50
  -6   5   6   90.49   13.70
   5  -5  -6   13.00    6.70
  -5   5   6    7.50   10.50
  -5   5   6   -6.10   12.50
   4  -5  -6   64.99    9.50
   3  -5  -6  168.38   12.00
   3  -5  -6  141.79   12.40
   2  -5  -6  189.68   12.60
   2  -5  -6  184.88   12.40
   1  -5  -6  125.19   10.90
   0  -5  -6   82.19   10.20
  -1  -5  -6  136.49   11.50
  -2  -5  -6  203.98   14.10
  -3  -5  -6  169.58   14.80
  -4  -5  -6   66.39   10.30
  -5  -5  -6   12.10    8.80
  -5  -5  -6   29.50    8.60
  -6  -5  -6   78.49   11.60
  -6  -5  -6   80.29   12.10
  -7  -5  -6   -0.20    8.00
  -7  -5  -6    9.40    7.70
  -7   6   6   26.50    9.80
   6  -6  -6   20.60    7.10
  -6   6   6   27.90   12.30
   5  -6  -6    6.80    6.80
  -5   6   6    4.10   11.80
  -5   6   6    8.20   11.50
   4  -6  -6  103.19   14.20
   4  -6  -6  126.49   12.30
   3  -6  -6   11.70    7.20
   2  -6  -6   98.29   11.50
   1  -6  -6   20.70    6.80
   0  -6  -6   31.90    7.30
  -1  -6  -6   17.70    8.20
  -2  -6  -6  101.29   10.70
  -3  -6  -6    3.20    8.50
  -3  -6  -6   11.60    8.60
  -4  -6  -6  113.89   15.00
  -4  -6  -6  125.79   14.80
  -5  -6  -6    0.30    8.70
  -5  -6  -6    6.90    9.50
  -6  -6  -6   34.90   10.00
  -6  -6  -6   22.10    9.50
  -7  -6  -6   20.50    8.60
  -7   7   6   10.90    8.40
   6  -7  -6    7.40    6.50
  -6   7   6    1.60   12.40
   5  -7  -6   11.40    7.60
  -5   7   6    8.30   12.90
   4  -7  -6    5.10    8.80
   4  -7  -6    9.60    7.20
  -4   7   6   -0.20   13.40
   3  -7  -6   33.10   10.00
   3  -7  -6   17.70    7.60
   3  -7  -6   25.20   10.30
   2  -7  -6   55.39    9.50
   1  -7  -6   13.40    8.10
   0  -7  -6   -0.20    7.80
  -1  -7  -6   -1.90    8.40
  -2  -7  -6   42.20    9.90
  -3  -7  -6   22.50    8.50
  -3  -7  -6   37.10   10.30
  -3  -7  -6   20.50   10.30
  -4  -7  -6    9.10    9.70
  -4  -7  -6   15.10    9.30
  -5  -7  -6    2.80    9.00
  -6  -7  -6   10.40    8.80
  -7  -7  -6   19.00    7.50
   6  -8  -6    2.10    6.10
  -6   8   6  -11.70   13.70
   5  -8  -6    2.90    7.70
  -5   8   6   -0.70   15.40
   4  -8  -6    6.30    9.60
   4  -8  -6    6.60    7.80
  -4   8   6   19.70   15.80
  -4   8   6   18.70    8.90
   3  -8  -6  141.49   13.80
   3  -8  -6   87.59   13.80
   3  -8  -6  124.19   16.50
   3  -8  -6  115.49   16.10
   2  -8  -6  101.39   15.80
   2  -8  -6  141.59   18.00
   2  -8  -6  120.09   16.00
   2  -8  -6   92.79   14.00
   2  -8  -6   85.89   12.40
   1  -8  -6   32.00   10.90
   1  -8  -6   30.80   10.00
   1  -8  -6   33.10    8.90
   1  -8  -6   16.70   12.50
   0  -8  -6   41.90    9.90
   0  -8  -6   42.50    9.40
   0  -8  -6   45.90   11.50
   0  -8  -6   51.19   12.60
  -1  -8  -6   27.40    9.30
  -1  -8  -6   38.60   11.90
  -1  -8  -6   37.30   11.20
  -2  -8  -6   99.99   11.60
  -2  -8  -6   89.29   13.40
  -2  -8  -6  110.89   14.50
  -3  -8  -6   83.69   13.40
  -3  -8  -6  100.89   14.40
  -3  -8  -6  115.69   16.20
  -4  -8  -6   10.30    8.30
  -4  -8  -6   -1.80    8.80
  -5  -8  -6    5.10    8.50
  -6  -8  -6   -1.50    7.90
   5  -9  -6   52.49    7.90
  -5   9   6   98.79   21.30
   4  -9  -6   85.79   10.50
   4  -9  -6  140.39   14.00
  -4   9   6  158.08   23.50
   3  -9  -6   70.09    9.70
   3  -9  -6   65.09   12.40
   3  -9  -6   72.69   12.90
  -3   9   6   85.29   15.40
   2  -9  -6   58.19   12.50
   2  -9  -6   83.49   15.10
   2  -9  -6   91.09   13.20
   1  -9  -6    3.50   11.30
   1  -9  -6   18.40    9.80
   1  -9  -6    8.50    8.90
   1  -9  -6   21.60   12.80
   1  -9  -6   -2.20   11.90
   0  -9  -6   10.40    9.00
   0  -9  -6  -10.20   11.00
   0  -9  -6    7.20   11.90
   0  -9  -6   -1.10    8.30
   0  -9  -6    8.60   11.40
  -1  -9  -6    9.30    8.90
  -1  -9  -6  -10.80   15.60
  -1  -9  -6    8.60    9.90
  -1  -9  -6   26.30   11.70
  -2  -9  -6   50.89   12.60
  -2  -9  -6   60.09   10.70
  -3  -9  -6   37.00    9.60
  -3  -9  -6   61.59   12.00
  -4  -9  -6   91.49   12.70
  -4  -9  -6  109.69   13.30
  -5  -9  -6   31.50    9.80
  -4  10   6   30.70   21.10
   3 -10  -6   36.40    9.20
   3 -10  -6   46.40    7.80
   3 -10  -6   24.20    8.30
   2 -10  -6   12.00   10.40
   2 -10  -6   15.40   13.60
   2 -10  -6   31.90   10.90
   1 -10  -6   -0.80    9.40
   1 -10  -6   -9.60   11.00
   1 -10  -6    7.50   12.20
   1 -10  -6    3.50    8.60
   0 -10  -6   70.89   13.30
   0 -10  -6   79.49   11.70
   0 -10  -6   88.49   14.40
   0 -10  -6   53.29   10.40
  -1 -10  -6   18.00   10.50
  -1 -10  -6    5.80   10.50
  -1 -10  -6    1.10    9.20
  -2 -10  -6   17.60   10.70
  -2 -10  -6   15.80    9.20
  -3 -10  -6   40.40    9.10
  -3 -10  -6   33.00   10.80
  -4 -10  -6    4.60    8.90
  -4 -10  -6    7.90    7.50
   3 -11  -6    1.70    5.10
   2 -11  -6    7.50    8.50
   2 -11  -6   11.50    7.70
   1 -11  -6   51.59    9.50
   1 -11  -6   16.70    6.60
   0 -11  -6  113.39   13.20
   0 -11  -6  115.69   15.80
  -1 -11  -6   47.90    8.50
  -1 -11  -6   23.70    7.30
  -2 -11  -6   12.00    6.80
  -2 -11  -6    6.10    6.70
  -3 -11  -6    1.70    6.00
  -3 -11  -6   -0.20    6.90
   1 -12  -6    6.10    5.80
   0 -12  -6    2.20    5.80
   0 -12  -6   -0.60    5.80
  -1 -12  -6    2.20    5.60
  -1 -12  -6   12.00    4.90
  -1 -12   7   50.49    7.80
   0 -12   7    5.00    8.70
   1 -12   7   44.60    7.10
   1 -12   7   45.10    9.50
  -3 -11   7   28.50    6.50
  -3 -11   7   18.60    5.70
  -2 -11   7   45.30    8.60
  -2 -11   7   51.39    7.70
  -1 -11   7  103.79   16.10
  -1 -11   7   64.99    8.50
   0 -11   7    8.10   10.60
   0 -11   7    3.30    7.50
   1 -11   7   84.69   15.00
   1 -11   7  107.39   12.90
   2 -11   7   38.80   12.20
  -3  11  -7   17.30   18.40
   3 -11   7   22.50    9.80
   3 -11   7   13.00    4.90
  -4 -10   7    9.60    6.40
  -4 -10   7    3.70    6.70
  -3 -10   7   43.40    8.80
  -3 -10   7   50.19    9.80
  -2 -10   7   33.00   10.50
  -2 -10   7    8.80    8.00
  -1 -10   7   30.50   10.80
  -1 -10   7   25.40    8.80
  -1 -10   7   34.60    8.70
   0 -10   7    8.70    8.50
   0 -10   7   19.20   10.60
   1 -10   7   42.00   13.00
   1 -10   7   30.70   10.40
   2 -10   7   13.00    9.80
   2 -10   7   11.50   16.10
   3 -10   7   46.40   23.20
   3 -10   7   23.00    6.70
   3 -10   7   49.00    7.40
  -4  10  -7    7.20   16.40
   4 -10   7    4.60    5.80
   4 -10   7    6.30    4.50
  -5  -9   7   31.20    7.60
  -5  -9   7   10.00    6.50
  -4  -9   7    7.40    7.40
  -4  -9   7    1.10    7.60
  -4  -9   7   12.70    8.80
  -3  -9   7   40.60    8.50
  -3  -9   7   51.09    9.70
  -3  -9   7   34.60   11.30
  -2  -9   7   14.50    7.50
  -2  -9   7    7.80    9.60
  -1  -9   7   17.70    8.00
  -1  -9   7   -1.90    8.10
  -1  -9   7    6.40   10.20
   0  -9   7   29.20    9.60
   0  -9   7   39.10   12.20
  -1   9  -7   -2.70    7.90
   1  -9   7   11.90    9.10
   1  -9   7   27.20   11.10
  -2   9  -7   27.40    8.90
   2  -9   7   14.90   12.70
   2  -9   7    3.50    6.10
   2  -9   7   20.00    9.80
   3  -9   7   36.60   10.20
   3  -9   7   44.80    7.90
   4  -9   7    0.60    5.80
   4  -9   7    4.20    6.90
  -5   9  -7   50.09   13.40
  -6  -8   7   15.40    7.60
  -5  -8   7   35.40    7.70
  -5  -8   7   20.90    9.40
  -5  -8   7   25.60    8.30
  -4  -8   7   50.99   11.20
  -4  -8   7   34.20   11.10
  -4  -8   7   56.79    9.10
  -4  -8   7   41.10    9.10
  -3  -8   7   19.50   10.10
  -3  -8   7   31.40    9.20
  -2  -8   7   37.00    9.90
  -2  -8   7   25.30    7.90
  -1  -8   7   47.00   14.20
  -1  -8   7   36.00    9.00
  -1  -8   7   20.70    7.50
   0   8  -7  229.08   16.10
   0  -8   7  225.38   17.70
   0  -8   7  272.67   22.80
  -1   8  -7    5.00    7.70
   1  -8   7   15.40    9.30
  -2   8  -7   40.20    9.30
   2  -8   7   49.40   10.70
   2  -8   7   38.50    7.80
  -3   8  -7   23.60    8.90
   3  -8   7   30.90    7.60
   3  -8   7   17.10   10.10
  -4   8  -7   56.79    9.60
   4  -8   7   51.29    8.90
  -5   8  -7   46.40   13.70
   5  -8   7   52.09    8.80
  -6   8  -7   33.90   10.10
   6  -8   7   34.70    6.50
  -7  -7   7   25.50    7.50
  -6  -7   7   41.70    9.30
  -6  -7   7   22.50    8.00
  -5  -7   7    8.30    7.80
  -5  -7   7   18.20    8.60
  -5  -7   7   11.00    8.80
  -4  -7   7   57.49   10.30
  -4  -7   7   74.39   11.60
  -4  -7   7   81.09   11.60
  -3  -7   7  197.68   17.60
  -2  -7   7   61.39   12.50
  -1  -7   7  165.68   18.80
   0   7  -7    8.50    6.50
   0  -7   7   33.20   11.50
  -1   7  -7  212.48   14.00
   1  -7   7  169.28   16.30
  -2   7  -7   66.69    9.60
   2  -7   7   59.19   10.80
  -3   7  -7  273.57   16.50
   3  -7   7  219.38   17.80
   3  -7   7  248.88   16.20
  -4   7  -7  111.99   12.60
   4  -7   7   77.39    9.50
  -5   7  -7   20.40   11.50
   5  -7   7   16.40    7.80
  -6   7  -7   59.09   11.90
  -6   7  -7   66.09   13.70
   6  -7   7   69.49    8.40
  -7   7  -7   -0.90    6.50
  -7  -6   7   36.70    7.60
  -7  -6   7   39.20    8.60
  -6  -6   7    5.40    6.60
  -6  -6   7   11.90    8.60
  -5  -6   7   29.50   10.10
  -5  -6   7   46.20    9.30
  -5  -6   7   35.90    9.40
  -4  -6   7   91.59   14.00
  -4  -6   7   91.59   11.90
  -3  -6   7   24.70    8.40
  -2  -6   7   92.39   12.50
  -1  -6   7  123.39   15.30
   0   6  -7    6.20    5.50
   0  -6   7   12.00    7.60
   0  -6   7    0.30    9.00
  -1   6  -7  106.59   10.00
   1  -6   7   79.49   10.30
  -2   6  -7  103.49   11.20
   2  -6   7   75.09   10.80
  -3   6  -7   23.70    7.40
   3  -6   7   52.39   10.10
  -4   6  -7  109.89   13.00
   4  -6   7  104.79   13.30
  -5   6  -7   38.80   15.60
  -5   6  -7   42.00   11.70
   5  -6   7   55.19    8.50
  -6   6  -7   30.90   13.70
  -6   6  -7   -1.80   10.20
   6  -6   7  -10.20    6.80
  -7   6  -7   21.00   10.60
   7  -6   7   41.00    7.20
  -7  -5   7   21.00    8.30
  -7  -5   7   10.60    7.00
  -6  -5   7   15.00    8.50
  -6  -5   7   10.60    8.90
  -5  -5   7  199.08   17.30
  -5  -5   7  183.08   15.40
  -5  -5   7  175.48   16.30
  -4  -5   7   98.99   12.90
  -2  -5   7   73.89   10.50
  -1  -5   7   76.89   10.10
  -1  -5   7   90.19   10.80
   0   5  -7   75.59    8.00
   0  -5   7   90.99   11.20
   0  -5   7   70.09    9.10
  -1   5  -7   66.29    8.60
   1  -5   7   61.09    8.40
   1  -5   7   75.19   12.20
  -2   5  -7   85.79    9.50
   2  -5   7   61.09    9.10
  -3   5  -7  168.08   12.30
   3  -5   7  155.78   14.40
  -4   5  -7  137.49   12.00
   4  -5   7  135.89   14.80
  -5   5  -7  191.88   28.50
  -5   5  -7  221.28   21.10
   5  -5   7  196.98   14.20
  -6   5  -7   20.30    9.90
  -6   5  -7    6.90   14.90
  -7   5  -7   15.80   12.40
   7  -5   7   14.80    7.60
  -8  -4   7   62.59    8.80
  -7  -4   7   74.69   10.90
  -7  -4   7  118.19   14.70
  -6  -4   7   23.00    8.20
  -6  -4   7   21.50    9.00
  -6  -4   7   19.90    9.00
  -5  -4   7  101.89   12.80
  -5  -4   7   97.29   13.20
  -4  -4   7  143.39   12.40
  -2  -4   7   67.99    9.50
  -1  -4   7   20.00    6.60
  -1  -4   7    1.40    7.30
   0  -4   7   51.79    7.40
   0  -4   7   60.89    8.00
  -1   4  -7   17.30    5.30
   1  -4   7   26.50    6.30
   1  -4   7   25.50    6.90
  -2   4  -7   64.49    8.60
   2  -4   7   80.69   10.50
  -3   4  -7   88.09    9.70
   3  -4   7   54.59    8.60
  -4   4  -7  223.98   13.00
   4  -4   7  175.78   14.80
  -6   4  -7   20.20   13.30
  -6   4  -7   25.80   16.90
  -7   4  -7   67.19   15.70
  -8   4  -7   62.39   10.70
   8  -4   7   58.49    7.70
  -8  -3   7   55.69    8.90
  -8  -3   7   35.10    7.70
  -7  -3   7   40.20   10.10
  -7  -3   7   57.69   10.10
  -6  -3   7   16.50    8.60
  -6  -3   7    8.20    7.80
  -6  -3   7   21.40    8.80
   5   3  -7   -6.80    8.10
  -5  -3   7    0.50    6.80
  -2  -3   7   18.50    6.50
  -1  -3   7   77.19    8.70
  -1  -3   7   76.99    9.60
   0  -3   7  405.36   17.70
   0  -3   7  433.26   17.40
   1  -3   7   70.79    8.90
  -2   3  -7   21.70    5.20
   2  -3   7   27.50    6.40
  -3   3  -7   30.40    5.50
   3  -3   7    5.50    5.80
   4  -3   7    1.70    5.70
   5  -3   7   -3.90    6.00
  -6   3  -7   25.70   16.90
  -7   3  -7   61.79   16.10
  -8   3  -7   71.59   11.00
   8  -3   7   55.69    7.50
  -8  -2   7    7.80    8.00
  -8  -2   7   14.80    6.40
  -7  -2   7   35.80    9.00
  -7  -2   7   30.50    9.90
  -6  -2   7   26.40    8.70
  -6  -2   7   19.80    8.70
  -6  -2   7   24.20    8.70
   5   2  -7   78.59   11.40
  -5  -2   7   59.29    9.60
  -2  -2   7  678.73   24.40
  -1  -2   7  897.31   30.40
   0  -2   7 2379.86   75.09
   1  -2   7  867.11   29.10
   2  -2   7  714.83   25.10
  -3   2  -7  487.85   18.30
   3  -2   7  493.75   19.10
   4  -2   7   79.39    8.70
   5  -2   7   63.39    7.60
  -6   2  -7   25.00   17.60
  -7   2  -7   41.80   15.00
  -8   2  -7   10.90    9.20
   8  -2   7    7.10    6.30
  -8  -1   7   17.00    8.20
  -8  -1   7    0.40    6.10
   7   1  -7   52.09    7.80
  -7  -1   7   36.70    9.50
  -7  -1   7   52.09   10.60
  -7  -1   7   44.80    9.30
   6   1  -7    3.20    6.90
  -6  -1   7   29.30    9.50
  -6  -1   7   33.10    9.10
  -6  -1   7   14.80    8.70
   5   1  -7  165.28   16.60
  -5  -1   7  168.38   14.30
   4   1  -7   84.29   12.70
  -3  -1   7   65.59    9.10
  -2  -1   7  231.18   12.00
  -1  -1   7   96.99    8.50
   0  -1   7 9999.00  307.77
   1  -1   7   74.89    6.20
   2  -1   7  203.48    9.20
   3  -1   7   47.90    6.50
   4  -1   7   82.99    8.00
  -7   1  -7   22.30   13.70
   8  -1   7    8.40    6.00
   8   0  -7   10.40    6.00
  -8   0   7   26.00    8.00
   7   0  -7    2.10    6.40
  -7   0   7    3.00    8.50
  -7   0   7   -9.30    7.50
  -7   0   7    4.10    9.10
   6   0  -7    8.30    7.20
  -6   0   7    7.80    8.10
  -6   0   7   28.70    9.20
   5   0  -7  109.69   13.50
  -5   0   7  101.89   12.40
   4   0  -7  720.93   28.90
   3   0  -7  257.47   14.60
  -2   0   7   54.69    8.40
  -1   0   7  167.18    9.30
   0   0   7   -4.10    2.80
   1   0   7  170.58    6.80
   2   0   7   42.40    4.30
   3   0   7  196.38    9.10
   4   0   7  600.14   25.40
   7   0   7   -4.40    7.40
   8   0   7   19.40    5.90
   8  -1  -7    5.60    5.80
  -8   1   7    8.00    7.70
   7  -1  -7   25.70    7.50
  -7   1   7   40.70   10.10
  -7   1   7   20.60    9.40
  -7   1   7   22.20    8.80
   6  -1  -7   20.20    7.40
  -6   1   7   16.20    8.10
  -6   1   7    4.00    8.80
   5  -1  -7  170.38   15.50
  -5   1   7  194.08   14.90
   4  -1  -7   70.89    9.00
   4  -1  -7   96.19   11.90
   3  -1  -7   62.49    8.70
   3  -1  -7   68.59    8.30
   2  -1  -7  246.28   13.00
   2  -1  -7  231.98   11.30
   1  -1  -7   81.79    7.80
   0  -1  -7 8907.41  292.37
   0  -1  -7 9856.11  293.17
   8  -2  -7    7.80    5.90
  -8   2   7    7.90    9.60
  -8   2   7   11.60    7.10
   7  -2  -7   20.30    7.80
  -7   2   7   39.20   10.30
  -7   2   7   19.90   10.20
   6  -2  -7   31.70    7.80
  -6   2   7   38.40   12.80
  -6   2   7   14.10    9.30
  -6   2   7   37.60    9.20
   5  -2  -7   64.79    9.60
  -5   2   7   76.09   10.90
   4  -2  -7   99.59   11.90
   3  -2  -7  575.94   22.70
   3  -2  -7  519.55   20.60
   2  -2  -7  724.73   26.70
   2  -2  -7  750.72   25.70
   1  -2  -7  819.52   26.90
   1  -2  -7  773.12   27.10
   0  -2  -7 2177.88   75.09
   0   2   7 2171.98   74.39
  -1  -2  -7  729.43   28.10
   8  -3  -7   56.19    7.20
  -8   3   7   50.79    7.80
  -8   3   7   50.29    8.30
   7  -3  -7   65.99    9.20
  -7   3   7   50.49   11.20
   6  -3  -7   21.60    7.60
  -6   3   7   22.60    9.80
  -6   3   7   15.90   12.30
   5  -3  -7    1.70    6.90
  -5   3   7   -6.60    6.20
   4  -3  -7    9.40    6.50
   3  -3  -7   16.60    4.90
   3  -3  -7   24.10    6.70
   2  -3  -7   21.60    5.70
   2  -3  -7   20.70    4.90
   1  -3  -7   74.19    8.10
   1  -3  -7   37.30    5.10
   0  -3  -7  379.26   15.20
  -1  -3  -7   59.29    7.40
  -2  -3  -7   23.70    5.20
  -5  -3  -7   -8.90    7.00
  -6  -3  -7   22.30    8.40
  -6  -3  -7   27.90    9.70
   8  -4  -7   70.69    7.90
  -8   4   7   64.99    9.10
  -8   4   7   68.59   10.90
   7  -4  -7  113.09   11.40
  -7   4   7  103.89   13.70
   6  -4  -7   22.60    7.50
  -6   4   7   25.70   10.60
  -6   4   7   21.20   12.10
   5  -4  -7  110.69   11.50
   5  -4  -7  106.09   11.40
   4  -4  -7  188.08   14.30
   3  -4  -7   80.19    9.50
   3  -4  -7   70.49   10.30
   2  -4  -7   55.69    6.50
   2  -4  -7   58.29    9.00
   1  -4  -7   24.30    5.80
   1  -4  -7   22.50    5.30
   0  -4  -7   54.49    6.70
   0  -4  -7   51.89    6.50
  -1  -4  -7   20.50    5.40
  -2  -4  -7   64.29    7.20
  -4  -4  -7  145.79   14.50
  -5  -4  -7   94.29   12.90
  -5  -4  -7  120.79   14.70
  -6  -4  -7   26.20    9.80
  -6  -4  -7   20.60    8.60
  -7  -4  -7   78.39   10.80
  -7  -4  -7   36.80   13.00
   7  -5  -7   25.40    6.90
  -7   5   7   36.90   10.90
   6  -5  -7   -1.60    6.00
   6  -5  -7   14.10    7.50
  -6   5   7   15.90   11.00
  -6   5   7    3.90   12.00
   5  -5  -7  211.08   14.90
  -5   5   7  212.08   22.90
  -5   5   7  219.48   23.90
   4  -5  -7  124.59   13.10
   3  -5  -7  151.58   11.90
   3  -5  -7  140.49   12.30
   2  -5  -7   55.19    7.30
   2  -5  -7   60.99    9.30
   1  -5  -7   68.69    9.90
   0  -5  -7   61.49    7.40
  -1  -5  -7   84.79   10.90
  -2  -5  -7   47.20    7.80
  -3  -5  -7  112.09   13.30
  -4  -5  -7  121.19   15.30
  -5  -5  -7  192.08   17.90
  -5  -5  -7  183.38   16.20
  -6  -5  -7   25.80    9.50
  -6  -5  -7    1.80    9.20
  -7  -5  -7   23.90    8.80
  -7  -5  -7   17.90    8.20
  -7   6   7   50.29   10.80
   6  -6  -7    3.20    6.30
  -6   6   7  -10.40   11.30
   5  -6  -7   39.50    7.70
  -5   6   7   20.60   12.30
  -5   6   7   53.39   13.90
   4  -6  -7   88.39   13.70
   4  -6  -7   83.99   12.00
   3  -6  -7   22.20    7.60
   2  -6  -7   85.29   11.30
   1  -6  -7   79.09   11.10
   0  -6  -7    7.10    6.60
  -1  -6  -7   72.19    9.30
  -2  -6  -7   68.69    9.40
  -3  -6  -7   21.60    9.10
  -3  -6  -7   20.00    9.00
  -4  -6  -7   79.89   11.20
  -4  -6  -7  101.29   15.50
  -5  -6  -7   44.70   11.40
  -5  -6  -7   37.10   10.20
  -6  -6  -7    3.30    8.60
  -6  -6  -7   -7.60    8.30
  -7  -6  -7   44.90    9.30
  -7   7   7   18.60    8.60
   6  -7  -7   59.69    7.90
  -6   7   7   34.30   13.80
   5  -7  -7   29.20    8.00
  -5   7   7   18.20   13.50
   4  -7  -7   98.99   14.80
   4  -7  -7   79.79   12.80
  -4   7   7  125.59   17.80
   3  -7  -7  223.78   15.90
   3  -7  -7  258.67   18.60
   3  -7  -7  260.37   19.00
   2  -7  -7   54.29    9.90
   1  -7  -7  189.28   16.20
   0  -7  -7   24.00    8.90
  -1  -7  -7  212.58   16.70
  -2  -7  -7   59.39   10.60
  -3  -7  -7  231.28   19.00
  -3  -7  -7  234.38   17.10
  -3  -7  -7  234.38   19.50
  -4  -7  -7   79.39   12.10
  -5  -7  -7    8.60    9.10
  -6  -7  -7   35.70    9.90
  -7  -7  -7   32.90    7.60
   6  -8  -7   32.50    7.20
   5  -8  -7   49.70    9.10
  -5   8   7   47.20   17.40
   4  -8  -7   57.09   10.90
   4  -8  -7   64.79   10.00
  -4   8   7   50.19   10.00
  -4   8   7   80.89   18.70
   3  -8  -7   18.00   13.50
   3  -8  -7   35.60    8.20
   3  -8  -7   53.39   11.40
   3  -8  -7   32.80   11.50
   2  -8  -7   27.00   10.20
   2  -8  -7   50.39    8.40
   2  -8  -7   55.39   11.30
   2  -8  -7   42.30   13.00
   2  -8  -7   45.90   11.80
   1  -8  -7   21.40    9.60
   1  -8  -7   28.70   13.00
   1  -8  -7   26.60    8.60
   1  -8  -7   48.40   11.20
   0  -8  -7  212.78   19.60
   0  -8  -7  255.67   20.00
   0  -8  -7  215.48   17.10
   0  -8  -7  225.68   16.60
  -1  -8  -7   16.10    8.90
  -1  -8  -7   25.60   11.40
  -1  -8  -7   15.70   10.90
  -2  -8  -7   20.80   10.90
  -2  -8  -7   36.70   11.50
  -2  -8  -7   44.40    9.50
  -3  -8  -7   24.70   10.40
  -3  -8  -7   28.50    8.70
  -3  -8  -7   47.40   13.00
  -4  -8  -7   39.20   10.70
  -4  -8  -7   45.20    9.50
  -5  -8  -7   31.40    9.90
  -6  -8  -7   32.70    8.80
   5  -9  -7    0.50    7.60
   5  -9  -7   18.70    6.90
  -5   9   7   14.90   20.10
   4  -9  -7   -1.80    7.50
   4  -9  -7   -3.60    7.70
  -4   9   7   -7.00   18.90
   3  -9  -7   62.29   12.40
   3  -9  -7   60.99    9.50
   3  -9  -7   49.99   12.10
   2  -9  -7    1.10   10.30
   2  -9  -7   -0.80   10.30
   2  -9  -7    8.20   12.60
   1  -9  -7    1.30   12.00
   1  -9  -7    0.00    9.20
   1  -9  -7   -0.10   12.20
   1  -9  -7   21.30    9.10
   0  -9  -7   40.30   13.20
   0  -9  -7   59.89   12.90
   0  -9  -7   56.39   12.90
   0  -9  -7   42.20   10.50
   0  -9  -7   48.10   10.30
  -1  -9  -7   11.30   10.30
  -1  -9  -7   19.90   11.40
  -1  -9  -7    8.70    8.90
  -2  -9  -7   11.00   11.00
  -2  -9  -7   23.80    9.20
  -3  -9  -7   44.70    9.40
  -3  -9  -7   46.20   11.70
  -4  -9  -7   -8.40    7.50
  -4  -9  -7    3.00    9.00
  -5  -9  -7    5.80    8.90
   4 -10  -7   17.80    6.60
   4 -10  -7    4.70    5.10
   3 -10  -7   19.10    8.20
   3 -10  -7   51.19    7.90
   3 -10  -7   30.00    8.70
   2 -10  -7   15.10   10.60
   2 -10  -7    9.50   10.70
   1 -10  -7   38.60    9.90
   1 -10  -7   36.30   12.70
   1 -10  -7   26.80   12.40
   1 -10  -7   52.09   10.90
   0 -10  -7   17.00    9.10
   0 -10  -7   19.90    9.10
   0 -10  -7   10.20   11.60
   0 -10  -7   -2.50   10.80
  -1 -10  -7   21.30    9.90
  -1 -10  -7   25.90   11.80
  -1 -10  -7   22.80   11.00
  -2 -10  -7   27.20    9.60
  -2 -10  -7   16.90   10.10
  -3 -10  -7   65.79    9.90
  -3 -10  -7   41.90   11.00
  -4 -10  -7   12.70    7.40
  -4 -10  -7   14.00    9.30
   3 -11  -7   16.90    5.90
   2 -11  -7   42.60    9.50
   2 -11  -7   36.70    8.70
   1 -11  -7   79.29   10.60
   0 -11  -7    4.70    7.50
   0 -11  -7   13.00    7.10
  -1 -11  -7   28.90    8.00
  -1 -11  -7   70.49    9.20
  -2 -11  -7   44.30    7.80
  -2 -11  -7   29.20    8.20
  -3 -11  -7   13.10    7.20
  -3 -11  -7   31.20    6.90
   1 -12  -7   40.60    6.70
   0 -12  -7    6.80    8.10
   0 -12  -7   10.40    6.00
  -1 -12  -7   36.40    5.70
  -1 -12  -7   37.20    6.90
  -1 -12   8   17.00    7.20
   0 -12   8   25.50    9.30
   1 -12   8   -1.40    8.40
   1 -12   8    3.30    7.10
  -3 -11   8   -3.20    5.00
  -3 -11   8    5.70    6.00
  -2 -11   8    5.70    7.50
  -2 -11   8    8.40    6.30
  -1 -11   8   28.30    7.20
  -1 -11   8   -2.00    8.90
   0 -11   8  145.29   13.30
   0 -11   8  153.98   19.60
   1 -11   8   16.20    8.60
   1 -11   8   31.50   13.50
   2 -11   8    6.20    5.30
   2 -11   8   23.90   11.60
   3 -11   8   -1.20    4.20
   3 -11   8   -6.10    8.80
  -4 -10   8   12.00    6.40
  -3 -10   8   31.40    8.50
  -3 -10   8   35.20    9.40
  -2 -10   8  114.09   13.70
  -2 -10   8  109.19   17.70
  -1 -10   8   38.70    9.10
  -1 -10   8   30.60   11.10
  -1 -10   8   42.00    9.00
   0 -10   8   54.19   10.30
   0 -10   8   44.80   11.50
   1 -10   8   45.70   10.80
   1 -10   8   60.49   13.60
   2 -10   8  119.29   14.80
   2 -10   8  138.09   19.50
   3 -10   8   19.70    6.20
   3 -10   8   14.80    6.20
  -4  10  -8  -14.60   15.50
   4 -10   8   12.70    5.70
   4 -10   8    7.70    5.90
  -5  -9   8   -4.30    6.60
  -5  -9   8    3.60    6.10
  -4  -9   8   -2.20    7.10
  -4  -9   8   10.00    8.40
  -4  -9   8   -2.50    7.00
  -3  -9   8    8.70    7.50
  -3  -9   8   23.00    9.00
  -2  -9   8   27.20   10.00
  -2  -9   8    1.20    7.00
  -1  -9   8   18.40   11.00
  -1  -9   8   12.70    8.40
  -1  -9   8   31.20    8.30
   0  -9   8    9.90    8.60
   0  -9   8    6.40   10.80
  -1   9  -8   29.60    8.80
   1  -9   8   10.40    9.10
   1  -9   8   11.30   11.10
  -2   9  -8   14.10    8.20
   2  -9   8    7.40   12.40
   2  -9   8    2.20    9.40
   2  -9   8   14.10    6.50
   3  -9   8   19.60    9.00
   3  -9   8   11.50    6.90
   4  -9   8   -4.40    6.70
  -5   9  -8   -8.90   11.10
   5  -9   8    7.90    6.40
  -6  -8   8   10.30    6.10
  -5  -8   8   12.20    8.70
  -5  -8   8    4.30    6.90
  -5  -8   8    3.20    7.10
  -4  -8   8    0.10    7.90
  -4  -8   8    7.50    9.40
  -4  -8   8    2.90    7.70
  -3  -8   8  106.49   16.20
  -3  -8   8  130.49   17.70
  -2  -8   8    0.50    8.80
  -1  -8   8   20.80    9.00
  -1  -8   8   43.00   14.10
  -1  -8   8   28.10    7.70
   0  -8   8   77.19   11.30
   0  -8   8   93.59   15.00
  -1   8  -8   22.60    8.50
   1  -8   8   35.40   10.30
  -2   8  -8   21.90    8.40
   2  -8   8   17.00    9.10
   2  -8   8   22.40    7.50
  -3   8  -8  171.78   15.60
   3  -8   8  148.89   16.90
   3  -8   8  150.08   14.10
  -4   8  -8   21.50    8.40
   4  -8   8    8.10    7.70
  -5   8  -8   17.60   12.80
   5  -8   8   20.80    7.50
  -6   8  -8   12.00    9.20
   6  -8   8   20.40    6.00
  -7  -7   8   21.60    7.00
  -6  -7   8   53.49    9.70
  -6  -7   8   35.00    8.20
  -5  -7   8   14.10    8.60
  -5  -7   8   12.70    8.80
  -5  -7   8   17.60    7.90
  -4  -7   8   67.39   10.30
  -4  -7   8   91.09   12.00
  -4  -7   8   64.29   11.10
  -3  -7   8  287.87   19.80
  -1  -7   8   73.19   13.40
   0   7  -8   14.00    7.00
   0  -7   8    9.20   15.40
   0  -7   8   -8.10   10.70
  -1   7  -8   70.99    9.20
   1  -7   8   48.20   10.10
  -2   7  -8  100.19   12.50
   2  -7   8  104.99   16.00
  -3   7  -8  317.47   18.80
   3  -7   8  322.17   19.50
   3  -7   8  298.37   17.80
  -4   7  -8   78.09   10.40
   4  -7   8   99.49   13.20
  -5   7  -8    4.00   11.30
   5  -7   8   19.70    7.90
  -6   7  -8   59.89   13.50
  -6   7  -8   51.29   11.60
   6  -7   8   65.89    8.10
  -7   7  -8    6.30    6.70
  -7  -6   8   20.90    8.00
  -7  -6   8   16.20    6.80
  -6  -6   8    4.70    6.30
  -6  -6   8   19.60    8.60
  -5  -6   8   31.80   10.00
  -5  -6   8    1.40    8.20
  -5  -6   8   11.10    8.40
  -4  -6   8   11.70    8.20
  -4  -6   8   11.20    8.40
  -3  -6   8   35.70   11.50
  -2  -6   8  188.28   19.00
  -1  -6   8   13.80   10.00
   0   6  -8    4.50    5.50
   0  -6   8    7.30    7.30
   0  -6   8   14.40    9.50
  -1   6  -8   24.30    6.40
   1  -6   8   25.00    8.40
  -2   6  -8  214.78   14.00
   2  -6   8  221.68   16.50
  -3   6  -8   33.30    8.00
   3  -6   8   43.10   10.10
  -4   6  -8   16.40    7.60
   4  -6   8   -1.10    7.30
  -5   6  -8   33.80   11.10
  -5   6  -8    7.80   14.80
   5  -6   8   -0.50    7.00
  -6   6  -8   28.80   11.00
  -6   6  -8   24.60   14.40
   6  -6   8   35.80    8.00
  -7   6  -8   22.80   10.60
   7  -6   8   14.20    6.60
  -7  -5   8    3.30    5.50
  -7  -5   8   19.40    8.00
  -6  -5   8   18.70    8.60
  -6  -5   8    6.60    9.10
  -6  -5   8   17.80    9.00
  -5  -5   8   43.70    9.70
  -5  -5   8   66.59   10.80
  -5  -5   8   42.40    9.70
  -4  -5   8   13.10    7.60
  -2  -5   8   92.79   11.60
  -1  -5   8   74.49   10.20
  -1  -5   8   87.79   11.10
   0   5  -8   -1.70    4.80
   0  -5   8   10.70    6.80
   0  -5   8   14.20    7.90
  -1   5  -8   86.79    9.30
   1  -5   8   77.69   11.90
  -2   5  -8  117.79   10.50
   2  -5   8   84.49   12.10
  -3   5  -8   71.19   10.10
   3  -5   8   57.79    9.70
  -4   5  -8    6.70    6.80
   4  -5   8   12.20    8.20
  -5   5  -8   70.89   18.60
  -5   5  -8   37.80   11.10
   5  -5   8   55.49    8.10
  -6   5  -8   11.30    9.70
  -6   5  -8   21.00   15.20
  -7   5  -8    2.20   12.70
   7  -5   8    0.50    7.30
  -8  -4   8   10.70    6.80
  -7  -4   8   34.50    9.00
  -7  -4   8   10.50    8.30
  -6  -4   8   33.30    9.80
  -6  -4   8   39.00    9.80
  -6  -4   8   36.40    9.00
  -5  -4   8  172.98   14.80
  -5  -4   8  149.69   15.10
  -2  -4   8  271.37   14.90
  -1  -4   8  302.47   15.20
  -1  -4   8  298.37   17.20
   0   4  -8  310.47   13.70
   0  -4   8  311.77   16.70
   0  -4   8  335.47   16.00
  -1   4  -8  289.47   13.40
   1  -4   8  298.97   15.30
  -2   4  -8  277.67   13.90
   2  -4   8  293.77   16.00
  -3   4  -8   15.00    5.70
   3  -4   8   30.10    7.30
  -4   4  -8  234.08   14.20
   4  -4   8  235.38   15.70
  -6   4  -8   28.90   17.20
  -7   4  -8   11.80   14.00
  -8   4  -8    3.70    9.00
   8  -4   8    3.40    5.60
  -8  -3   8   37.50    8.20
  -8  -3   8   19.40    7.40
  -7  -3   8   35.50    9.40
  -7  -3   8   49.80   10.80
  -6  -3   8   -2.50    8.00
  -6  -3   8   16.40    8.70
  -6  -3   8   26.40    8.40
   5   3  -8   43.10   10.00
  -5  -3   8   56.09    9.20
  -2  -3   8  189.38   12.40
  -1  -3   8   98.69   10.20
  -1  -3   8   86.89   12.40
   0  -3   8  105.29    9.90
   0  -3   8  108.19   11.60
   1  -3   8   78.89    9.10
  -2   3  -8  182.88    9.80
   2  -3   8  171.28   11.50
  -3   3  -8   64.89    7.90
   3  -3   8   50.59    7.50
   4  -3   8    1.80    6.00
   5  -3   8   44.60    7.80
  -6   3  -8    5.60   16.60
  -7   3  -8   57.69   16.00
  -8   3  -8   39.30   10.00
   8  -3   8   24.20    6.50
  -8  -2   8    9.90    6.30
  -8  -2   8   13.50    8.00
  -7  -2   8   13.50    9.10
  -7  -2   8    8.20    7.90
  -7  -2   8   -0.10    7.80
  -6  -2   8   73.99   11.00
  -6  -2   8   78.29   11.60
  -6  -2   8   72.99   10.90
   5   2  -8   21.60    9.50
  -5  -2   8   -5.30    7.20
  -2  -2   8   96.79    9.20
  -1  -2   8 1104.69   37.10
   0  -2   8 1227.08   40.10
   1  -2   8 1027.40   34.00
   2  -2   8   94.29    8.40
  -3   2  -8  238.58   11.50
   3  -2   8  249.18   12.30
   4  -2   8  117.19    9.60
  -6   2  -8   83.59   19.10
  -7   2  -8   14.60   14.00
  -8   2  -8   13.10    9.50
   8  -2   8   10.50    6.10
  -8  -1   8    6.00    5.90
  -8  -1   8   14.20    7.90
   7   1  -8    6.80    6.50
  -7  -1   8   -4.80    8.40
  -7  -1   8    1.80    7.80
  -7  -1   8   11.90    8.70
   6   1  -8  196.38   13.50
  -6  -1   8  220.68   17.40
  -6  -1   8  209.58   19.00
  -6  -1   8  187.18   15.60
   5   1  -8    1.30    8.10
  -5  -1   8    1.80    7.00
   4   1  -8  363.06   18.90
  -3  -1   8  327.17   15.60
  -2  -1   8   36.60    6.10
  -1  -1   8  877.91   29.60
   0  -1   8 1297.37   41.70
   1  -1   8  825.92   27.20
   2  -1   8   25.00    4.20
   3  -1   8  263.77   11.70
   4  -1   8  280.67   12.90
  -7   1  -8  -13.30   13.00
   8  -1   8   17.20    6.10
   8   0  -8    4.20    5.80
  -8   0   8  -11.80    6.70
  -8   0   8    5.50    5.80
   7   0  -8   -5.70    6.50
  -7   0   8   -1.30    7.70
  -7   0   8   -6.20    8.60
  -7   0   8  -15.10    8.10
   6   0  -8  367.86   18.60
  -6   0   8  370.66   21.60
  -6   0   8  372.56   23.40
   5   0  -8   -8.30    7.60
  -5   0   8    4.10    7.20
   4   0  -8   28.80    8.00
   4   0  -8   24.00    5.80
   3   0  -8   18.90    6.70
  -2   0   8    4.80    5.40
  -1   0   8  290.67   12.00
   0   0   8  708.63   23.20
   1   0   8  270.37    9.60
   2   0   8    3.30    2.60
   3   0   8   17.20    3.50
   8   0   8   -1.90    6.60
   8  -1  -8    5.30    5.80
  -8   1   8    3.20    7.30
   7  -1  -8    3.40    7.00
  -7   1   8    4.90    8.20
  -7   1   8    9.30    8.90
  -7   1   8   13.60    8.90
   6  -1  -8  215.38   13.80
  -6   1   8  187.78   19.60
  -6   1   8  224.58   16.90
  -6   1   8  145.19   19.80
   5  -1  -8    0.60    7.20
  -5   1   8   -0.30    6.80
   4  -1  -8  346.47   18.30
   4  -1  -8  346.27   15.90
   3  -1  -8  321.87   14.10
   3  -1  -8  288.17   16.20
   2  -1  -8   28.70    6.40
   2  -1  -8   21.50    4.90
   1  -1  -8  805.82   27.60
   0  -1  -8 1241.48   45.50
   0  -1  -8 1221.48   44.90
   8  -2  -8   24.90    6.50
  -8   2   8   30.20    7.70
  -8   2   8   23.40    7.50
   7  -2  -8    4.00    7.10
  -7   2   8   20.00   10.10
   6  -2  -8   80.59   11.70
  -6   2   8  110.59   15.00
  -6   2   8   83.09   12.40
  -6   2   8   99.39   11.80
   5  -2  -8    9.70    7.40
  -5   2   8   27.60    7.50
   4  -2  -8  141.19   13.60
   4  -2  -8  121.49   10.50
   3  -2  -8  291.87   15.50
   3  -2  -8  259.77   13.30
   2  -2  -8  106.49    9.00
   2  -2  -8  117.19    8.90
   1  -2  -8  924.31   31.10
   1  -2  -8  933.61   31.30
   0  -2  -8 1154.88   45.20
   8  -3  -8   48.00    6.90
  -8   3   8   42.90    8.10
  -8   3   8   30.60    7.60
   7  -3  -8   57.49    8.60
  -7   3   8   40.00   11.50
   6  -3  -8   23.20    7.60
  -6   3   8   10.80    9.40
  -6   3   8   33.30   12.40
   5  -3  -8   47.40    8.80
  -5   3   8   47.30    8.50
   4  -3  -8    9.40    6.80
   3  -3  -8   63.89    8.30
   3  -3  -8   73.69    8.70
   2  -3  -8  176.98   11.20
   2  -3  -8  179.88   10.20
   1  -3  -8   76.09    7.50
   1  -3  -8   89.59    8.50
   0  -3  -8   83.79    8.30
  -1  -3  -8   77.99    7.70
  -2  -3  -8  164.18   10.30
  -5  -3  -8   48.50    9.70
   8  -4  -8    9.20    5.00
  -8   4   8    7.90    6.50
  -8   4   8   -4.40    5.80
   7  -4  -8   31.90    7.70
  -7   4   8   20.90   11.30
   6  -4  -8   41.40    8.40
  -6   4   8   50.69   11.50
  -6   4   8   39.60   13.10
   5  -4  -8  213.88   14.10
   5  -4  -8  206.58   13.70
   4  -4  -8  216.58   15.20
   3  -4  -8   28.00    6.10
   3  -4  -8   26.30    6.80
   2  -4  -8  269.57   14.70
   2  -4  -8  301.77   14.00
   1  -4  -8  301.27   14.20
   0  -4  -8  314.37   14.40
   0  -4  -8  309.97   14.00
  -1  -4  -8  260.77   13.10
  -1  -4  -8  257.87   12.00
  -2  -4  -8  235.78   13.30
  -4  -4  -8  214.58   16.20
  -5  -4  -8  187.28   15.40
  -5  -4  -8  194.08   16.90
  -6  -4  -8   55.79   11.10
  -6  -4  -8   54.49   10.10
   7  -5  -8    3.20    5.90
  -7   5   8   -2.70    9.60
   6  -5  -8    6.70    7.30
   6  -5  -8    7.60    6.40
  -6   5   8   18.00   11.10
   5  -5  -8   58.89    8.20
  -5   5   8   71.69   15.10
  -5   5   8   57.39   13.00
   4  -5  -8   16.30    7.30
   3  -5  -8   85.49   11.20
   3  -5  -8   86.29   11.30
   2  -5  -8   78.69   10.30
   1  -5  -8   82.89   10.20
   0  -5  -8    0.10    5.90
  -1  -5  -8   76.79   10.50
  -2  -5  -8   69.59    8.30
  -4  -5  -8    0.10    8.50
  -5  -5  -8   41.00   10.10
  -5  -5  -8   49.40   11.00
  -6  -5  -8    1.50    8.50
  -6  -5  -8   -2.20    9.20
  -7  -5  -8    0.40    7.30
  -7  -5  -8   14.10    8.40
  -7   6   8   16.10    9.90
   6  -6  -8   21.50    7.00
  -6   6   8   36.10   12.50
   5  -6  -8   17.10    6.90
  -5   6   8   25.90   12.90
   4  -6  -8    3.40    8.50
   4  -6  -8   11.40    6.50
   3  -6  -8   29.40    8.10
   2  -6  -8  204.28   14.80
   1  -6  -8   17.60    7.10
   0  -6  -8    0.90    6.50
  -1  -6  -8   28.10    7.80
  -2  -6  -8  182.18   15.50
  -3  -6  -8   10.30    8.80
  -3  -6  -8   32.00   10.00
  -4  -6  -8    1.70    8.70
  -4  -6  -8   12.90    9.30
  -5  -6  -8   24.20   10.40
  -5  -6  -8    0.90    8.60
  -6  -6  -8   33.40   10.30
  -6  -6  -8   32.00   10.10
  -7  -6  -8   37.30    9.10
  -7   7   8   22.50    8.90
   6  -7  -8   61.69    8.00
  -6   7   8   62.79   15.10
   5  -7  -8   37.60    8.60
  -5   7   8   35.70   15.20
   4  -7  -8   94.09   12.10
   4  -7  -8   93.59   13.10
  -4   7   8   63.89   16.80
   3  -7  -8  332.17   20.70
   3  -7  -8  337.67   21.90
   3  -7  -8  330.17   18.10
   2  -7  -8   88.29   10.90
   1  -7  -8   51.39    9.00
   0  -7  -8   11.20    8.40
  -1  -7  -8   64.29   10.50
  -2  -7  -8   93.99   11.80
  -3  -7  -8  273.07   20.90
  -3  -7  -8  283.07   18.70
  -3  -7  -8  289.97   20.40
  -4  -7  -8   71.19   11.80
  -5  -7  -8   12.80    9.60
  -6  -7  -8   42.60    9.90
   6  -8  -8   14.00    6.10
   5  -8  -8   21.10    8.30
  -5   8   8   16.60   17.10
   4  -8  -8   16.00    9.20
   4  -8  -8   13.90    8.30
  -4   8   8  -14.10   16.00
  -4   8   8    6.10    9.40
   3  -8  -8  156.88   14.70
   3  -8  -8  164.38   18.90
   3  -8  -8  155.48   17.20
   2  -8  -8   14.00   10.70
   2  -8  -8   11.50   12.00
   2  -8  -8   12.00    9.70
   2  -8  -8   26.50   10.90
   2  -8  -8    7.30    6.90
   1  -8  -8   35.30   10.50
   1  -8  -8   21.60    9.50
   1  -8  -8   16.80    8.50
   1  -8  -8   29.90   12.60
   0  -8  -8   72.99   13.50
   0  -8  -8   61.59   10.70
   0  -8  -8   80.59   10.80
   0  -8  -8   72.29   12.30
  -1  -8  -8   18.90   11.40
  -1  -8  -8   26.00    9.30
  -1  -8  -8   32.30   11.40
  -2  -8  -8    9.10   10.40
  -2  -8  -8    3.70    8.40
  -2  -8  -8   -2.80   10.10
  -3  -8  -8  146.99   15.70
  -3  -8  -8  144.99   17.70
  -4  -8  -8   10.30   12.90
  -4  -8  -8    8.70    9.60
  -5  -8  -8   18.60    9.20
  -6  -8  -8   -2.20    7.80
   5  -9  -8    4.20    6.60
   5  -9  -8    3.90    4.50
  -5   9   8   -5.40   17.40
   4  -9  -8    6.50    7.80
   4  -9  -8    6.30    7.60
   3  -9  -8   13.80   11.40
   3  -9  -8   13.70    8.20
   3  -9  -8   12.90   11.30
   2  -9  -8   19.10   10.70
   2  -9  -8   20.90   10.50
   2  -9  -8   17.00   12.70
   1  -9  -8   50.19   13.50
   1  -9  -8   10.00   11.80
   1  -9  -8   18.10    9.90
   1  -9  -8   27.60    9.50
   0  -9  -8   15.20   12.00
   0  -9  -8   31.20   10.00
   0  -9  -8   -6.70   16.80
   0  -9  -8   20.80    9.20
   0  -9  -8   11.10   11.60
  -1  -9  -8   25.20   11.70
  -1  -9  -8   15.30    9.40
  -1  -9  -8   13.60   10.50
  -2  -9  -8   20.80   11.50
  -2  -9  -8   24.20    9.30
  -3  -9  -8   21.90    8.70
  -3  -9  -8   -3.40    9.90
  -4  -9  -8    6.20    8.10
  -4  -9  -8    6.90    9.50
  -5  -9  -8    5.00    8.10
   4 -10  -8   10.40    5.60
   4 -10  -8   18.20    6.50
   3 -10  -8   23.70    8.90
   3 -10  -8   33.00    7.30
   3 -10  -8   14.00    8.10
   2 -10  -8  145.79   17.30
   2 -10  -8  107.79   16.80
   1 -10  -8   49.80   10.10
   1 -10  -8   58.79   12.90
   1 -10  -8   42.40   12.90
   1 -10  -8   61.79   11.60
   0 -10  -8   53.59   13.20
   0 -10  -8   54.99   13.00
   0 -10  -8   55.09   11.90
   0 -10  -8   68.69   11.20
  -1 -10  -8   32.80   12.20
  -1 -10  -8   59.69   10.50
  -2 -10  -8   90.09   13.60
  -2 -10  -8  150.88   16.00
  -3 -10  -8   24.20    8.70
  -3 -10  -8    1.60    9.70
  -4 -10  -8   14.80    8.90
  -4 -10  -8   18.70    7.40
   3 -11  -8   15.50    6.20
   2 -11  -8    0.10    7.40
   2 -11  -8   13.60    7.90
   1 -11  -8    1.40    8.30
   1 -11  -8   17.30    7.60
   1 -11  -8    4.90    5.50
   0 -11  -8  165.78   14.50
  -1 -11  -8    6.50    8.50
  -1 -11  -8    5.80    7.40
  -2 -11  -8   10.40    8.10
  -2 -11  -8   12.40    6.90
  -3 -11  -8   -0.60    7.70
  -3 -11  -8    9.00    6.20
   1 -12  -8    3.30    6.30
   0 -12  -8   10.50    4.20
  -1 -12  -8   12.70    5.00
  -1 -12  -8   -0.40    4.60
   0 -12   9   43.00    9.80
  -3 -11   9   18.10    6.10
  -3 -11   9   19.00    5.40
  -2 -11   9    4.80    6.20
  -2 -11   9   20.20    8.00
  -1 -11   9   -8.70    6.10
  -1 -11   9    4.30    8.40
  -1 -11   9    3.80    9.10
   0 -11   9    8.60    7.70
   0 -11   9   15.00   10.80
   1 -11   9    9.90   11.60
   1 -11   9    2.00    8.20
   2 -11   9    7.30   10.90
   2 -11   9    3.70    4.90
   3 -11   9   28.00    7.90
   3 -11   9   13.10    4.70
   3 -11   9   10.80    9.30
  -4 -10   9   29.50    7.10
  -4 -10   9   22.70    6.40
  -3 -10   9   13.40    7.70
  -3 -10   9   11.60    8.50
  -2 -10   9   33.10    8.70
  -2 -10   9   26.00   10.20
  -1 -10   9   19.90   10.80
  -1 -10   9   12.70    8.10
  -1 -10   9   20.70    8.00
   0 -10   9   17.20    8.90
   0 -10   9    3.30   10.50
   1 -10   9   17.30    9.70
   1 -10   9    4.00   12.80
   2 -10   9   31.70    9.30
   2 -10   9   59.99   17.60
   3 -10   9    8.50    5.90
   3 -10   9   10.40    5.60
  -4  10  -9   46.30   15.90
   4 -10   9   15.50    6.00
  -5  -9   9    5.30    6.60
  -5  -9   9    2.00    6.10
  -4  -9   9   55.99    8.40
  -4  -9   9   18.60    8.10
  -4  -9   9   57.09    9.50
  -3  -9   9   17.60    9.10
  -3  -9   9   17.40    7.90
  -2  -9   9    3.90    9.30
  -2  -9   9   12.70    7.40
  -1  -9   9   61.79    8.90
  -1  -9   9   47.30    9.60
  -1  -9   9   66.89   12.70
   0  -9   9   68.99   10.90
   0  -9   9   74.19   12.80
  -1   9  -9   99.19   13.40
   1  -9   9   53.69   12.40
   1  -9   9   69.69   11.60
  -2   9  -9    5.30    8.10
   2  -9   9    2.30    6.10
   2  -9   9   -0.20    9.50
   3  -9   9   19.80    8.20
   3  -9   9   20.60    7.30
   4  -9   9   47.50    8.10
  -5   9  -9   -2.00   11.00
   5  -9   9   -5.60    5.90
  -6  -8   9   57.29    7.80
  -5  -8   9    9.10    7.10
  -5  -8   9    6.00    7.10
  -5  -8   9   12.60    8.50
  -5  -8   9   10.00    7.70
  -4  -8   9   59.49   11.60
  -4  -8   9   58.29    9.90
  -3  -8   9   80.39   11.30
  -2  -8   9  103.39   12.80
  -1  -8   9   51.39    8.80
  -1  -8   9  109.59   16.40
  -1  -8   9   71.49   10.60
   0  -8   9   27.20    9.60
   0  -8   9   29.50   16.50
  -1   8  -9   95.89   10.90
   1  -8   9   75.49   11.90
  -2   8  -9  116.29   13.50
   2  -8   9  106.39   15.30
   2  -8   9   97.49   12.50
  -3   8  -9  111.49   14.20
   3  -8   9  106.49   12.80
   3  -8   9  103.09   15.60
   4  -8   9   53.19    9.00
  -5   8  -9    4.30   12.40
   5  -8   9    5.00    7.00
  -6   8  -9  114.69   16.10
   6  -8   9  111.59    9.60
  -7  -7   9    5.00    7.30
  -6  -7   9    8.50    6.90
  -6  -7   9   16.50    8.30
  -5  -7   9   11.90    8.80
  -5  -7   9    7.50    8.50
  -5  -7   9   13.60    7.50
  -4  -7   9   58.69   10.60
  -4  -7   9   71.89   10.40
  -4  -7   9   66.89   11.60
  -3  -7   9    9.70   11.20
  -1  -7   9  143.79   15.80
   0   7  -9   51.09    8.20
   0  -7   9   36.80   12.30
   0  -7   9   49.80   10.00
  -1   7  -9  144.99   12.70
   1  -7   9  128.49   15.30
  -2   7  -9   64.69    9.50
   2  -7   9   67.39   11.80
  -3   7  -9   -3.00    7.50
   3  -7   9   22.40    7.70
   3  -7   9    5.60    8.30
  -4   7  -9  108.39   13.80
   4  -7   9   90.89   13.30
  -5   7  -9   17.90   11.60
   5  -7   9   21.20    7.70
  -6   7  -9    8.10   12.00
  -6   7  -9    3.80   10.30
   6  -7   9   20.30    6.80
  -7   7  -9   10.40    6.70
  -7  -6   9    7.00    6.20
  -7  -6   9   -5.60    6.80
  -6  -6   9    5.30    7.80
  -6  -6   9   10.00    8.80
  -5  -6   9   51.79   10.20
  -5  -6   9   59.99   11.00
  -5  -6   9   52.19   10.40
  -4  -6   9  274.67   21.90
  -4  -6   9  267.47   18.10
  -4  -6   9  270.17   18.00
  -1  -6   9    8.00   10.40
   0   6  -9   73.09    9.90
   0  -6   9   66.29   11.40
   0  -6   9   62.19    9.30
  -1   6  -9   35.70    7.30
   1  -6   9   21.30    8.10
  -2   6  -9   58.09    8.60
   2  -6   9   50.99    9.70
  -3   6  -9   95.59   11.90
   3  -6   9  100.69   15.30
  -4   6  -9  350.36   18.60
   4  -6   9  335.37   18.10
  -5   6  -9   77.69   12.70
  -5   6  -9   61.79   16.60
   5  -6   9   60.99    8.80
  -6   6  -9   13.70   10.90
  -6   6  -9   10.70   14.50
   6  -6   9    2.50    7.30
  -7   6  -9    0.00    8.90
   7  -6   9   -0.50    6.20
  -7  -5   9   45.70    9.00
  -7  -5   9   58.69    9.30
  -6  -5   9   33.20    9.70
  -6  -5   9   26.50    9.80
  -6  -5   9   35.20    9.50
  -5  -5   9   60.39   10.80
  -5  -5   9   53.09   10.30
  -5  -5   9   75.59   10.70
  -4  -5   9   42.20    8.90
  -1  -5   9   20.50    9.30
  -1  -5   9   25.40    7.60
   0   5  -9   93.89    9.00
   0  -5   9  115.69   11.80
   0  -5   9  101.79   12.80
  -1   5  -9   21.90    6.20
   1  -5   9   18.50    7.70
  -2   5  -9   15.90    6.20
   2  -5   9   15.70    7.50
  -3   5  -9   71.49    8.60
   3  -5   9   37.40    9.00
  -4   5  -9   35.60    8.10
   4  -5   9   46.40    9.50
  -5   5  -9   49.90   18.40
  -5   5  -9   53.39   11.40
   5  -5   9   64.19    8.60
  -6   5  -9   46.30   16.20
  -7   5  -9   43.70   13.90
   7  -5   9   64.49    8.70
  -8  -4   9    3.10    6.40
  -7  -4   9   31.90    9.00
  -7  -4   9   60.89    9.80
  -6  -4   9   -5.30    8.10
  -6  -4   9   15.40    8.90
  -6  -4   9  -12.40    7.30
  -5  -4   9    7.70    7.80
  -5  -4   9    5.70    7.60
  -4  -4   9   -9.20    6.10
  -2  -4   9  239.88   14.10
  -1  -4   9  147.29   12.10
  -1  -4   9  163.78   14.10
   0   4  -9  325.27   14.10
   0  -4   9  325.17   16.00
   0  -4   9  334.67   16.50
  -1   4  -9  137.49    9.40
   1  -4   9  162.88   12.00
  -2   4  -9  243.68   12.90
   2  -4   9  248.58   15.10
  -3   4  -9  157.88   11.10
   3  -4   9  153.98   13.10
  -4   4  -9    1.30    6.00
   4  -4   9    0.90    6.80
  -6   4  -9   -0.60   16.20
  -7   4  -9   47.30   15.30
  -8   4  -9   13.40    9.20
   8  -4   9    5.20    5.60
  -8  -3   9  111.69   11.60
  -7  -3   9  120.59   14.90
  -7  -3   9  119.99   15.00
  -7  -3   9  126.99   18.90
  -6  -3   9  111.29   14.50
  -6  -3   9  112.59   15.30
  -6  -3   9  101.99   15.70
   5   3  -9  180.18   17.10
  -5  -3   9  161.68   15.50
  -2  -3   9    7.70    6.20
  -1  -3   9   40.50    6.60
   0  -3   9   -4.70    7.30
   0  -3   9    1.80    5.50
   1  -3   9   74.99    9.90
  -2   3  -9   17.10    5.40
   2  -3   9   19.10    6.10
  -3   3  -9   15.90    5.30
   3  -3   9   14.30    6.20
   4  -3   9   37.90    7.30
   5  -3   9  157.08   13.10
  -6   3  -9   73.99   18.90
  -7   3  -9  101.49   17.50
  -8   3  -9  112.99   14.70
   8  -3   9   97.59    9.20
  -8  -2   9   17.80    6.50
  -8  -2   9   18.10    8.00
  -7  -2   9   27.50    9.10
  -7  -2   9   40.90    9.50
  -7  -2   9   38.20   10.10
  -6  -2   9   11.10    8.60
  -6  -2   9   -0.80    8.20
  -6  -2   9   25.20    9.10
   5   2  -9   88.09   12.30
  -5  -2   9   96.99   13.50
  -3  -2   9   52.39    9.10
  -2  -2   9  485.35   19.10
  -1  -2   9   69.49    8.30
   0  -2   9   -0.80    4.90
   1  -2   9   71.99    7.90
   2  -2   9  511.75   19.30
  -3   2  -9   56.59    6.30
   3  -2   9   70.19    8.30
   4  -2   9   31.60    6.30
  -6   2  -9   21.30   15.80
  -7   2  -9   46.50   16.10
  -8   2  -9   -0.20    9.20
   8  -2   9   28.10    6.60
  -8  -1   9    6.80    7.90
  -8  -1   9   18.40    6.60
   7   1  -9   92.29   11.00
  -7  -1   9   85.39   11.70
  -7  -1   9   99.79   16.50
  -7  -1   9   82.39   12.00
   6   1  -9   58.49    8.50
  -6  -1   9   70.29   11.30
  -6  -1   9   62.99   10.70
  -6  -1   9   40.30   10.10
   5   1  -9  131.59   15.60
  -5  -1   9   93.89   12.70
   4   1  -9   25.20    8.00
  -3  -1   9  211.68   12.80
  -2  -1   9  183.78   11.20
  -1  -1   9  703.13   24.20
   0  -1   9   94.39    8.00
   1  -1   9  730.83   24.40
   2  -1   9  161.68    8.40
  -3   1  -9  190.88   10.10
   3  -1   9  190.88    9.80
   4  -1   9   16.30    4.70
  -6   1  -9   50.49   16.70
  -7   1  -9   62.89   16.30
   8  -1   9   22.50    6.20
   8   0  -9   10.50    5.60
  -8   0   9    6.10    5.70
  -8   0   9   11.40    7.80
   7   0  -9   23.30    7.30
  -7   0   9   15.70    9.50
  -7   0   9   22.90    9.00
  -7   0   9   40.30   10.40
   6   0  -9  494.65   21.90
  -6   0   9  473.15   27.40
  -6   0   9  516.15   25.20
   5   0  -9  887.41   36.10
  -5   0   9  887.51   35.40
   4   0  -9   62.99    9.20
   4   0  -9   52.49    6.80
   3   0  -9  143.39   12.20
  -2   0   9   80.69    9.30
  -1   0   9   40.60    5.40
   0   0   9   -0.90    3.30
   1   0   9   36.90    4.40
   2   0   9   71.19    4.90
   3   0   9  124.29    9.30
   8  -1  -9   26.20    6.50
  -8   1   9    6.10    7.10
  -8   1   9   31.40    8.30
   7  -1  -9   84.49   11.50
  -7   1   9   72.49   11.60
  -7   1   9   99.69   14.70
  -7   1   9   86.59   12.00
   6  -1  -9   52.49    8.60
  -6   1   9   72.69   10.70
  -6   1   9   45.60   12.50
  -6   1   9   45.70   10.40
   5  -1  -9  101.89   14.30
  -5   1   9   78.69   11.70
   4  -1  -9   26.40    8.10
   4  -1  -9   26.80    5.80
   3  -1  -9  239.98   14.60
   3  -1  -9  215.88   12.00
   2  -1  -9  217.08   12.60
   2  -1  -9  206.98   10.90
   1  -1  -9  687.13   24.20
   0  -1  -9   87.69   16.40
   0  -1  -9   94.99   14.80
   8  -2  -9   25.60    6.40
  -8   2   9   26.10    7.50
  -8   2   9   24.50    7.70
   7  -2  -9   36.20    8.30
  -7   2   9   37.10    9.20
  -7   2   9   37.70   10.70
   6  -2  -9   15.10    6.90
  -6   2   9   16.40   11.40
  -6   2   9  -11.30    7.70
  -6   2   9    3.90    8.70
   5  -2  -9   80.69   10.90
  -5   2   9   93.79   11.90
   4  -2  -9   39.70    6.40
   4  -2  -9   43.20    8.60
   3  -2  -9   50.39    6.40
   3  -2  -9   60.99    8.40
   2  -2  -9  514.85   20.30
   2  -2  -9  528.25   19.70
   1  -2  -9   46.00    5.50
   1  -2  -9   52.49    7.10
   0  -2  -9   -3.70    9.20
   8  -3  -9  110.89    9.20
  -8   3   9  124.09   12.90
  -8   3   9  110.29   10.70
   7  -3  -9  133.59   12.40
  -7   3   9  154.18   20.20
   6  -3  -9   85.09   12.10
  -6   3   9  116.09   15.70
  -6   3   9  110.89   14.90
  -6   3   9  103.19   13.70
   5  -3  -9  155.98   14.20
  -5   3   9  163.98   14.20
   4  -3  -9   35.90    6.30
   4  -3  -9   21.10    7.10
   3  -3  -9   31.00    7.00
   3  -3  -9   26.30    6.00
   2  -3  -9   14.70    5.70
   2  -3  -9   12.20    4.90
   1  -3  -9   48.40    7.50
   1  -3  -9   47.30    5.70
   0  -3  -9   -9.80    4.40
  -1  -3  -9   42.00    5.60
  -2  -3  -9   22.20    5.20
  -5  -3  -9  128.69   14.50
   8  -4  -9    8.10    4.90
  -8   4   9   13.40    6.30
  -8   4   9   12.60    6.10
   7  -4  -9   35.00    7.60
  -7   4   9   34.80   11.20
   6  -4  -9    4.80    6.90
  -6   4   9   -9.40    9.40
  -6   4   9   14.00   11.90
   5  -4  -9   16.00    6.90
   5  -4  -9    3.40    5.50
  -5   4   9   10.80    8.50
   4  -4  -9   -4.10    6.30
  -4   4   9    7.50    7.00
   3  -4  -9  154.38   12.10
   3  -4  -9  137.09   11.00
   2  -4  -9  263.47   13.40
   2  -4  -9  226.08   13.30
   1  -4  -9  166.68   11.00
   1  -4  -9  167.48   11.10
   0  -4  -9  332.47   14.50
   0  -4  -9  325.47   14.90
  -1  -4  -9  125.29    9.30
  -1  -4  -9  115.39    9.90
  -2  -4  -9  222.68   13.20
  -4  -4  -9    1.60    7.60
  -5  -4  -9    5.00    8.50
  -5  -4  -9   34.40    8.90
  -6  -4  -9   -2.00   14.00
  -6  -4  -9   11.50    9.70
   7  -5  -9   65.39    9.60
  -7   5   9   69.59   12.40
   6  -5  -9   50.39    8.50
   6  -5  -9   54.29    8.00
  -6   5   9   44.50   12.10
   5  -5  -9   70.69    8.50
  -5   5   9   53.09   14.70
  -5   5   9   73.39   14.20
   4  -5  -9   47.50    9.20
   3  -5  -9   55.19    8.10
   3  -5  -9   42.60    8.20
   2  -5  -9   11.30    6.00
   1  -5  -9   23.80    6.50
   0  -5  -9  112.09   11.20
  -1  -5  -9   11.50    6.50
  -1  -5  -9   12.90    6.50
  -2  -5  -9   22.60    7.10
  -4  -5  -9   36.80   10.10
  -5  -5  -9   70.69   11.40
  -5  -5  -9   66.09   12.00
  -6  -5  -9   30.50   10.30
  -6  -5  -9   40.70   10.10
  -7   6   9   -1.80    9.50
   6  -6  -9    9.80    6.70
  -6   6   9   21.10   12.60
   5  -6  -9   79.09   12.50
  -5   6   9   94.89   15.60
   4  -6  -9  361.46   17.90
   4  -6  -9  327.37   20.20
   3  -6  -9   93.69   13.10
   2  -6  -9   48.90    8.10
   1  -6  -9   28.10    7.40
   0  -6  -9   65.89    8.60
  -1  -6  -9   31.50    8.20
  -2  -6  -9   59.89    9.70
  -4  -6  -9  299.27   20.30
  -4  -6  -9  325.47   21.00
  -5  -6  -9   63.89   12.10
  -5  -6  -9   69.69   11.60
  -6  -6  -9   14.30    9.30
  -7  -6  -9    2.70    7.50
  -7   7   9   10.10    8.80
   6  -7  -9   18.30    6.60
  -6   7   9   32.90   14.50
   5  -7  -9   18.20    7.80
  -5   7   9   50.99   16.00
   4  -7  -9   85.59   13.40
   4  -7  -9   98.19   12.30
  -4   7   9   85.29   17.30
   3  -7  -9   -2.00    8.90
   3  -7  -9   10.90    7.00
   3  -7  -9    6.30   10.00
   3  -7  -9    8.50    8.50
   2  -7  -9   70.29   13.70
   2  -7  -9   84.89   10.60
  -2   7   9   90.19   15.30
   1  -7  -9  145.59   15.20
   0  -7  -9   40.10    9.50
  -1  -7  -9  142.69   16.60
  -2  -7  -9   84.29   11.50
  -3  -7  -9    6.20    7.70
  -3  -7  -9    4.90    9.60
  -3  -7  -9   18.10    9.90
  -4  -7  -9   54.59   11.30
  -5  -7  -9    1.10    9.40
  -6  -7  -9   16.60    8.70
   6  -8  -9  135.19   10.70
  -6   8   9  151.88   23.70
   5  -8  -9   -8.50    7.20
   5  -8  -9    9.90    6.80
  -5   8   9   10.60   17.90
   4  -8  -9  101.09   14.60
   4  -8  -9   64.39   11.60
   3  -8  -9  105.09   16.20
   3  -8  -9  106.59   14.50
   3  -8  -9   90.59   14.10
   2  -8  -9  125.59   14.20
   2  -8  -9  124.89   15.10
   2  -8  -9  135.69   18.00
   2  -8  -9  144.79   22.20
   2  -8  -9  133.09   18.10
   1  -8  -9   79.09   14.90
   1  -8  -9   72.79   12.10
   1  -8  -9   69.79   11.60
   1  -8  -9   77.49   10.80
   0  -8  -9   49.00   10.20
   0  -8  -9   31.50    9.50
   0  -8  -9   29.40   11.30
   0  -8  -9   26.70   11.60
  -1  -8  -9   95.09   13.30
  -1  -8  -9   76.99   10.70
  -1  -8  -9   66.09   13.50
  -2  -8  -9  100.89   11.60
  -2  -8  -9  129.29   14.50
  -2  -8  -9  113.19   16.70
  -3  -8  -9  108.09   15.00
  -3  -8  -9  109.29   16.80
  -4  -8  -9   55.19   11.50
  -5  -8  -9   19.50    9.30
  -6  -8  -9   84.09   11.50
   5  -9  -9   -5.90    3.90
   5  -9  -9   10.10    6.50
  -5   9   9   15.90   17.30
   4  -9  -9   47.40    8.70
   4  -9  -9   71.39    9.40
   3  -9  -9   19.80   11.40
   3  -9  -9   32.60   11.90
   3  -9  -9   29.00    8.60
   2  -9  -9    9.80   10.40
   2  -9  -9    4.10   10.40
   2  -9  -9    1.10   12.30
   1  -9  -9   66.19   12.90
   1  -9  -9   58.99   13.50
   1  -9  -9   53.79   10.40
   1  -9  -9   72.39   11.80
   0  -9  -9   81.89   15.10
   0  -9  -9   86.59   11.30
   0  -9  -9   95.69   14.10
   0  -9  -9   85.59   12.90
  -1  -9  -9   76.69   11.60
  -1  -9  -9   77.09   13.60
  -2  -9  -9   22.90   11.50
  -2  -9  -9   27.10    9.50
  -3  -9  -9   20.70    9.10
  -3  -9  -9   22.50   10.60
  -4  -9  -9   33.30   10.40
  -4  -9  -9   84.49   12.40
  -5  -9  -9   14.00    8.50
   4 -10  -9   20.60    5.60
   4 -10  -9   23.80    6.60
   3 -10  -9    6.80    7.80
   3 -10  -9   -0.10    6.40
   2 -10  -9   15.50   11.20
   2 -10  -9   26.30   11.00
   1 -10  -9   10.20    9.90
   1 -10  -9   26.70   12.50
   1 -10  -9   28.60    9.50
   0 -10  -9   21.90    9.60
   0 -10  -9   23.70   10.80
   0 -10  -9    9.00   12.10
  -1 -10  -9   18.10    9.50
  -1 -10  -9    9.40   11.40
  -2 -10  -9   23.90    9.40
  -2 -10  -9   22.90   10.60
  -3 -10  -9   22.00   10.00
  -3 -10  -9   -2.20    7.90
  -4 -10  -9   14.70    7.40
  -4 -10  -9   22.70    9.00
   3 -11  -9   11.00    6.30
   2 -11  -9    8.70    5.80
   2 -11  -9   14.50    7.90
   1 -11  -9   -4.10    7.70
   1 -11  -9    7.20    7.30
   1 -11  -9    1.50    6.90
   0 -11  -9   -4.20    8.10
   0 -11  -9    3.00    7.30
  -1 -11  -9   -7.90    6.70
  -1 -11  -9    8.00    8.40
  -2 -11  -9    5.80    8.70
  -2 -11  -9   14.60    6.60
  -3 -11  -9   15.30    6.20
  -3 -11  -9   29.60    8.70
   0 -12  -9   12.50    5.10
  -3 -11  10   10.10    6.00
  -3 -11  10   11.00    5.30
  -2 -11  10    5.00    6.10
  -2 -11  10   -1.70    7.60
  -1 -11  10   28.80    7.50
  -1 -11  10   32.70   10.30
   0 -11  10   21.90   11.10
   0 -11  10   35.30    8.30
   1 -11  10   21.30   11.00
   1 -11  10   16.90    8.50
   2 -11  10    1.20    5.70
   2 -11  10    6.30   10.50
   3 -11  10   13.10    6.90
   3 -11  10    4.40    4.30
  -4 -10  10    5.90    6.50
  -4 -10  10    1.40    5.90
  -3 -10  10   21.20    9.10
  -3 -10  10   39.80    8.10
  -2 -10  10   28.00   10.50
  -2 -10  10   24.80    8.10
  -1 -10  10    9.50    7.70
  -1 -10  10   11.10    7.80
  -1 -10  10   24.80   11.00
   0 -10  10   62.29   13.10
   0 -10  10   62.39   10.30
   1 -10  10   15.00   13.70
   1 -10  10   11.30    9.20
   2 -10  10   26.90    8.70
   2 -10  10   37.70   17.00
   3 -10  10   40.00    6.70
   3 -10  10   19.30    5.90
  -4  10 -10   14.20   14.10
   4 -10  10    3.10    5.80
  -5  -9  10    2.50    6.50
  -4  -9  10   23.50    8.50
  -4  -9  10   20.60    7.30
  -3  -9  10    1.60    7.40
  -3  -9  10    2.90    8.60
  -2  -9  10   -1.00    9.20
  -2  -9  10    2.50    7.00
  -1  -9  10    3.40    6.90
  -1  -9  10   15.70    8.70
  -1  -9  10    7.80   10.70
   0  -9  10   43.30   10.10
   0  -9  10   34.20   11.60
  -1   9 -10   -0.10    7.70
   1  -9  10    6.60    9.40
   1  -9  10   15.70   11.60
  -2   9 -10    1.30    8.00
   2  -9  10    9.10    9.50
   2  -9  10   -4.40    6.20
   3  -9  10    4.90    6.50
   3  -9  10   11.00    6.90
   4  -9  10   10.20    7.10
  -5   9 -10   10.20   11.00
   5  -9  10   14.70    6.40
  -6  -8  10   22.90    6.10
  -5  -8  10   45.50    8.10
  -5  -8  10   39.70    9.50
  -5  -8  10   21.90    8.10
  -4  -8  10   45.90   10.60
  -4  -8  10   21.70    8.70
  -3  -8  10   39.40   10.00
  -2  -8  10   27.00   10.10
  -1  -8  10  151.18   15.40
  -1  -8  10  105.99   12.70
  -1  -8  10  147.19   19.50
   0  -8  10  391.26   22.00
  -1   8 -10  155.48   14.20
   1  -8  10  170.18   17.00
  -2   8 -10   21.70    8.60
   2  -8  10   30.40    7.40
   2  -8  10   26.10    9.80
  -3   8 -10   47.60    9.70
   3  -8  10   81.09   11.50
   3  -8  10   38.80    8.50
   4  -8  10   43.10    8.70
  -5   8 -10   49.50   13.30
   5  -8  10   56.19    8.30
  -6   8 -10   27.60    8.80
   6  -8  10   36.90    6.20
  -6  -7  10    1.10    6.50
  -6  -7  10    3.70    7.60
  -5  -7  10   51.29   10.10
  -5  -7  10   50.49   10.50
  -5  -7  10   35.60    7.90
  -4  -7  10    6.40    9.20
  -4  -7  10    4.30    8.30
  -3  -7  10  150.98   19.00
  -1  -7  10   85.99   14.30
   0   7 -10    6.40    6.60
   0  -7  10    4.30   11.50
   0  -7  10    6.40    8.40
  -1   7 -10   43.90    8.50
   1  -7  10   33.30    9.70
  -2   7 -10  122.49   13.80
   2  -7  10  106.09   15.30
   2  -7  10  108.29   16.00
  -3   7 -10  145.29   14.00
   3  -7  10  156.58   15.10
   3  -7  10  150.88   14.30
  -4   7 -10   23.60    8.30
   4  -7  10    7.20    7.70
  -5   7 -10   56.89   12.80
   5  -7  10   49.00    8.60
  -6   7 -10    1.40   12.20
  -6   7 -10   -5.70    9.80
   6  -7  10   -0.10    6.30
  -7  -6  10    3.50    6.90
  -6  -6  10   40.60    9.50
  -6  -6  10   64.29    9.50
  -6  -6  10   44.20    9.30
  -5  -6  10  104.99   13.90
  -5  -6  10  104.99   12.80
  -5  -6  10   92.89   12.00
  -4  -6  10  156.88   15.20
  -4  -6  10  136.89   19.40
  -4  -6  10  179.88   15.90
  -1  -6  10  111.49   13.60
  -1  -6  10  127.69   16.80
   0   6 -10  172.18   12.00
   0  -6  10  145.99   13.60
   0  -6  10  184.58   17.50
  -1   6 -10  118.99   11.10
   1  -6  10   85.59   13.30
  -2   6 -10  170.28   13.70
   2  -6  10  151.38   15.30
  -3   6 -10   40.90    8.60
   3  -6  10   44.00   10.30
  -4   6 -10  209.98   15.40
   4  -6  10  244.28   16.40
  -5   6 -10   94.49   18.50
  -5   6 -10  130.49   20.20
   5  -6  10  135.99   13.40
  -6   6 -10   63.29   11.90
  -6   6 -10   54.29   15.90
   6  -6  10   73.39    8.90
  -7   6 -10    2.70    8.40
   7  -6  10    8.40    6.10
  -7  -5  10   19.90    7.80
  -7  -5  10   -0.60    6.70
  -6  -5  10    0.40    7.90
  -6  -5  10   -5.60    7.40
  -6  -5  10  -19.80    8.80
  -5  -5  10   13.30    9.20
  -5  -5  10   25.40    9.10
  -5  -5  10   16.30    8.50
  -4  -5  10   17.30    7.80
  -1  -5  10  348.07   17.80
  -1  -5  10  362.96   20.90
   0   5 -10    4.20    5.20
   0  -5  10   -5.00    6.50
   0  -5  10   -5.40    8.10
  -1   5 -10  355.76   16.50
   1  -5  10  383.16   18.70
  -2   5 -10  281.57   15.10
   2  -5  10  299.57   17.10
  -3   5 -10   25.20    7.10
   3  -5  10    8.70    8.00
  -4   5 -10   36.90    8.10
   4  -5  10   39.70    9.30
  -5   5 -10   16.00   10.00
  -5   5 -10   14.40   16.40
   5  -5  10   15.80    7.00
  -6   5 -10   10.40   15.40
  -7   5 -10   -3.90   12.70
  -8  -4  10   15.00    6.50
  -7  -4  10    6.30    7.20
  -7  -4  10    8.90    7.90
  -6  -4  10   28.40    8.80
  -6  -4  10   30.90    9.70
  -6  -4  10   25.30    9.40
  -5  -4  10   11.50    8.00
  -5  -4  10   25.30    8.60
  -4  -4  10   93.99   12.50
  -2  -4  10   81.49   10.80
  -1  -4  10   31.50    9.10
  -1  -4  10   28.80    6.60
   0   4 -10  377.36   15.30
   0  -4  10  348.77   18.20
   0  -4  10  386.96   17.30
  -1   4 -10   26.10    6.00
   1  -4  10   37.30    7.60
  -2   4 -10  103.39    9.50
   2  -4  10   67.59    8.60
  -3   4 -10  254.17   14.10
   3  -4  10  244.78   15.70
  -4   4 -10  150.58   12.20
   4  -4  10  114.09   13.10
  -6   4 -10   21.00   16.60
  -7   4 -10   -4.40   14.00
  -8   4 -10   25.80    9.20
   8  -4  10   12.50    5.60
  -8  -3  10   77.09   10.30
  -7  -3  10   -2.60    8.40
  -7  -3  10    7.40    8.10
  -7  -3  10    2.50    7.90
  -6  -3  10    3.90    8.00
  -6  -3  10   -3.10    8.20
  -6  -3  10    5.20    8.40
  -5  -3  10   30.60    9.00
  -2  -3  10   87.79   10.20
  -1  -3  10  411.16   17.30
   0  -3  10  101.79   10.00
   0  -3  10  101.69   12.30
  -1   3 -10  385.66   15.90
   1  -3  10  398.16   16.90
  -2   3 -10   64.79    7.50
   2  -3  10   76.89    9.30
  -3   3 -10    9.80    5.30
   3  -3  10   -9.80    5.60
  -4   3 -10   12.80    6.00
   4  -3  10   23.60    7.00
  -6   3 -10   11.00   16.30
  -7   3 -10    7.50   14.60
  -8   3 -10   54.29   10.90
   8  -3  10   78.79    8.40
  -8  -2  10   20.80    6.70
  -8  -2  10   43.50    9.10
  -7  -2  10    6.80    8.50
  -7  -2  10    7.40    7.90
  -7  -2  10   -2.50    8.50
  -6  -2  10   99.29   12.40
  -6  -2  10  114.89   13.50
  -6  -2  10  100.29   12.30
   5   2 -10   41.60   10.60
  -5  -2  10   69.89   10.30
  -3  -2  10   66.19    9.90
  -2  -2  10  501.35   19.70
  -1  -2  10  669.13   24.60
   0  -2  10  322.27   14.20
   1  -2  10  608.64   21.90
  -2   2 -10  701.73   25.20
   2  -2  10  729.73   25.40
  -3   2 -10   60.69    7.50
   3  -2  10   54.29    7.90
   4  -2  10   68.59    9.10
  -6   2 -10   49.80   16.10
  -7   2 -10   -4.30   14.60
  -8   2 -10   18.20    9.70
   8  -2  10   24.30    6.60
   8   1 -10   72.89    8.90
  -8  -1  10   79.39   11.50
  -8  -1  10   66.49   10.10
   7   1 -10   61.09    8.60
  -7  -1  10   60.99   11.00
  -7  -1  10   54.69   10.70
  -7  -1  10   53.19   10.20
   6   1 -10   30.30    7.20
  -6  -1  10   40.30   10.10
  -6  -1  10   36.30   10.30
  -6  -1  10   17.80    9.70
   5   1 -10   23.50    9.30
   5   1 -10   34.20    7.20
  -5  -1  10   38.50    8.60
   4   1 -10  226.78   16.20
  -3  -1  10   54.69    7.30
  -2  -1  10   20.40    5.80
  -1  -1  10  326.77   14.00
   0  -1  10   24.10    4.90
   1  -1  10  332.07   13.00
   2  -1  10   25.20    4.40
  -3   1 -10   61.59    7.60
   3  -1  10   46.20    6.70
  -6   1 -10   14.50   15.90
  -7   1 -10   41.60   16.10
   8  -1  10   70.39    8.20
   8   0 -10   64.49    8.20
  -8   0  10   74.59    9.60
  -8   0  10   37.30    7.00
   7   0 -10   10.10    6.60
  -7   0  10   -0.30    8.80
  -7   0  10   -5.20    8.10
  -7   0  10   -0.10    9.20
   6   0 -10  104.09   11.70
  -6   0  10  110.29   15.40
  -6   0  10   97.59   13.10
   5   0 -10    3.50    8.40
  -5   0  10    8.00    7.70
   4   0 -10  274.37   17.10
   4   0 -10  266.57   14.30
   3   0 -10   25.00    6.70
  -2   0  10  943.41   32.70
  -1   0  10  142.49    9.30
   0   0  10    2.80    3.30
   1   0  10  133.09    6.50
   2   0  10  758.42   24.30
   8  -1 -10   77.79    9.00
  -8   1  10   82.39   12.70
  -8   1  10   79.29   11.00
   7  -1 -10   48.20    8.10
  -7   1  10   71.69   11.50
  -7   1  10   56.49   10.30
  -7   1  10   53.19   11.20
   6  -1 -10   22.80    7.40
  -6   1  10   34.00   10.10
  -6   1  10   24.50    9.20
   5  -1 -10   21.30    8.60
  -5   1  10   29.80    8.00
   4  -1 -10  224.48   15.70
   4  -1 -10  204.58   12.80
   3  -1 -10   76.89    9.00
   3  -1 -10   87.49   11.50
   2  -1 -10   27.30    6.50
   2  -1 -10   25.40    5.30
   1  -1 -10  312.27   13.20
   1  -1 -10  325.67   13.80
   0  -1 -10   17.90   10.10
   0  -1 -10   19.90    9.00
   8  -2 -10   27.00    6.40
  -8   2  10   27.20    8.00
  -8   2  10   26.60    7.40
   7  -2 -10   22.10    7.50
  -7   2  10   12.00    8.00
  -7   2  10   12.30   10.30
   6  -2 -10   94.19   12.00
  -6   2  10  122.19   18.80
  -6   2  10  139.99   16.20
  -6   2  10  141.19   18.60
   5  -2 -10   59.89   10.30
  -5   2  10   62.79    9.10
   4  -2 -10   57.39    7.20
   4  -2 -10   45.90    8.60
   3  -2 -10   43.60    7.90
   3  -2 -10   46.70    6.30
   2  -2 -10  761.42   27.70
   2  -2 -10  743.53   26.60
   1  -2 -10  534.95   20.00
   1  -2 -10  548.75   19.70
   0  -2 -10  258.07   11.50
   8  -3 -10   85.09    8.30
  -8   3  10   86.49   12.20
  -8   3  10   95.29   10.20
   7  -3 -10    1.70    6.50
  -7   3  10   -4.90   10.40
   6  -3 -10   -1.70    6.80
  -6   3  10    1.40    8.20
  -6   3  10   -7.90    9.10
   5  -3 -10   52.59    8.00
  -5   3  10   57.09    9.30
   4  -3 -10   22.10    7.70
   4  -3 -10   20.20    5.90
   3  -3 -10    2.10    5.30
   3  -3 -10    5.20    6.30
   2  -3 -10   84.49    9.90
   2  -3 -10   90.59    9.40
   1  -3 -10  372.66   15.20
   1  -3 -10  352.86   14.90
   0  -3 -10   75.19    8.30
  -1  -3 -10  329.37   13.90
  -2  -3 -10   66.79    8.90
   8  -4 -10   12.90    4.90
  -8   4  10   24.00    6.40
  -8   4  10    6.40    6.10
   7  -4 -10    4.00    6.60
  -7   4  10   12.30   10.90
   6  -4 -10   22.30    7.30
  -6   4  10   30.50   11.00
   5  -4 -10   28.00    6.50
   5  -4 -10   24.00    7.20
  -5   4  10   31.20    8.60
   4  -4 -10  118.19   12.20
   4  -4 -10   97.49   12.40
  -4   4  10  105.69   12.80
   3  -4 -10  235.68   14.70
   3  -4 -10  215.68   13.50
   2  -4 -10   86.69   10.00
   2  -4 -10   67.59    9.60
   1  -4 -10   38.90    6.60
   1  -4 -10   26.70    6.30
   0  -4 -10  365.76   15.50
   0  -4 -10  349.07   15.70
  -1  -4 -10   38.80    6.00
  -1  -4 -10   33.60    6.00
  -2  -4 -10   89.79   10.20
  -4  -4 -10  131.09   14.90
  -5  -4 -10   17.10    9.60
  -6  -4 -10   22.40   10.40
   7  -5 -10    1.40    6.10
  -7   5  10    7.50   10.70
   6  -5 -10    4.50    6.50
   6  -5 -10   12.60    7.30
  -6   5  10    0.80   10.70
   5  -5 -10   14.80    6.50
  -5   5  10   13.70   12.50
   4  -5 -10   35.80    8.40
  -4   5  10   58.39    9.30
   3  -5 -10   22.20    6.90
   2  -5 -10  302.87   15.60
   1  -5 -10  356.66   16.90
   0  -5 -10    2.40    6.20
   0  -5 -10    0.30    6.00
  -1  -5 -10  356.26   17.10
  -1  -5 -10  396.86   17.70
  -2  -5 -10  248.28   14.80
  -3  -5 -10   17.30    9.20
  -4  -5 -10   49.90   10.50
  -5  -5 -10   11.80    9.10
  -5  -5 -10   13.40    9.90
  -6  -5 -10   16.80    9.20
  -6  -5 -10    2.40    8.70
  -7   6  10    3.20   10.30
   6  -6 -10   62.59    8.30
  -6   6  10   71.19   14.40
   5  -6 -10  126.39   13.30
  -5   6  10  120.39   17.60
   4  -6 -10  180.58   14.50
   4  -6 -10  187.98   16.20
  -4   6  10  203.08   28.10
   3  -6 -10   49.80    8.80
  -3   6  10   44.10    9.10
   2  -6 -10  141.79   13.70
   1  -6 -10  126.29   13.40
   0  -6 -10  133.39   12.70
  -1  -6 -10  115.79   12.90
  -2  -6 -10  142.69   14.80
  -4  -6 -10  183.88   17.40
  -4  -6 -10  179.88   18.90
  -5  -6 -10  109.19   15.60
  -6  -6 -10   70.89   11.30
   6  -7 -10   -5.80    5.90
  -6   7  10    7.70   13.90
   5  -7 -10   76.19    9.70
  -5   7  10   63.69   17.50
   4  -7 -10   18.50    9.50
   4  -7 -10   11.50    7.40
   3  -7 -10  178.28   16.90
   3  -7 -10  156.18   13.60
   3  -7 -10  147.79   17.50
   3  -7 -10  145.99   17.30
   2  -7 -10   99.89   13.60
   2  -7 -10  129.49   15.50
  -2   7  10  118.89   15.50
   1  -7 -10   35.40    9.00
   0  -7 -10   -5.80    8.40
  -1  -7 -10   35.20    9.70
  -2  -7 -10  112.99   15.90
  -3  -7 -10  131.89   14.40
  -3  -7 -10  117.99   16.80
  -4  -7 -10    5.90    9.40
  -5  -7 -10   48.80   11.30
  -6  -7 -10   -6.00    8.00
   6  -8 -10   45.00    6.90
  -6   8  10   51.59   15.70
   5  -8 -10   31.80    7.10
   5  -8 -10   53.79    8.70
  -5   8  10   77.99   20.30
   4  -8 -10   44.80   11.40
   4  -8 -10   34.70    8.90
   3  -8 -10   62.99   12.60
   3  -8 -10   43.10   11.60
   3  -8 -10   61.49    9.30
   2  -8 -10   44.10    8.30
   2  -8 -10   27.80   11.30
   2  -8 -10   44.90   10.80
   2  -8 -10   33.90   10.80
   2  -8 -10   46.50   13.30
   1  -8 -10  141.69   16.00
   1  -8 -10  175.08   18.20
   1  -8 -10  164.48   16.20
   1  -8 -10  162.78   16.90
   1  -8 -10  169.78   20.60
   0  -8 -10  396.76   22.50
   0  -8 -10  380.76   21.80
   0  -8 -10  424.26   26.00
   0  -8 -10  432.86   25.40
  -1  -8 -10  188.18   19.70
  -1  -8 -10  172.08   20.20
  -1  -8 -10  163.38   16.60
  -2  -8 -10   32.70   11.10
  -2  -8 -10   14.10   11.10
  -2  -8 -10   26.50    8.60
  -3  -8 -10   39.60   11.60
  -3  -8 -10   48.90    9.20
  -4  -8 -10   44.70   11.10
  -5  -8 -10   50.39   10.60
  -6  -8 -10   36.30    8.80
   5  -9 -10   15.30    4.60
   5  -9 -10   22.50    6.80
  -5   9  10   14.60   11.10
   4  -9 -10   18.30    7.70
   4  -9 -10   21.00    7.80
   3  -9 -10   -4.70   10.80
   3  -9 -10   -8.00   10.20
   3  -9 -10    1.60    7.60
   2  -9 -10   10.90   10.70
   2  -9 -10    5.50   10.90
   1  -9 -10   -7.10   10.90
   1  -9 -10    3.10    8.80
   1  -9 -10    7.00   10.80
   1  -9 -10   27.20   10.50
   0  -9 -10   38.90   12.60
   0  -9 -10   24.50   10.90
   0  -9 -10   51.89   14.20
   0  -9 -10   51.49   10.30
  -1  -9 -10    2.70   11.20
  -1  -9 -10   11.50    9.60
  -2  -9 -10   -0.30    8.90
  -2  -9 -10    6.20   10.60
  -3  -9 -10   -2.00   10.20
  -3  -9 -10    9.70    8.70
  -4  -9 -10   15.70   10.80
  -4  -9 -10   10.10    9.40
  -5  -9 -10   20.70    8.80
   4 -10 -10    6.80    5.90
   4 -10 -10    5.50    5.00
   3 -10 -10   31.10    8.80
   3 -10 -10   54.69   10.60
   2 -10 -10   22.90   11.70
   2 -10 -10   38.30   10.80
   1 -10 -10    6.70    8.70
   1 -10 -10    5.50    9.60
   1 -10 -10  -12.90   10.70
   0 -10 -10   85.89   11.30
   0 -10 -10   66.19   13.70
  -1 -10 -10    8.30   11.90
  -1 -10 -10   19.60    9.80
  -2 -10 -10    8.90   10.00
  -2 -10 -10   30.90    9.60
  -3 -10 -10   40.80    9.50
  -3 -10 -10   62.99   11.20
  -4 -10 -10    6.50    7.10
  -4 -10 -10  -10.40    7.70
   3 -11 -10   13.10    6.20
   2 -11 -10    3.00    6.10
   2 -11 -10   10.30    7.80
   1 -11 -10   20.20    8.20
   1 -11 -10   15.20    7.60
   1 -11 -10   25.90    8.30
   0 -11 -10   40.00    8.50
   0 -11 -10   20.00    8.40
  -1 -11 -10   31.00    7.90
  -1 -11 -10   15.60    9.60
  -2 -11 -10   -6.90    8.70
  -2 -11 -10    5.30    6.30
  -3 -11 -10    9.30    6.00
  -3 -11 -10   15.70    8.20
  -3 -11  11   35.30    5.90
  -3 -11  11   43.00    6.80
  -2 -11  11    3.50    6.30
  -2 -11  11    3.50    7.70
  -1 -11  11   16.80   10.10
  -1 -11  11   23.10    7.50
   0 -11  11   16.30    8.00
   0 -11  11    3.60   10.60
   1 -11  11   16.00    8.30
   1 -11  11   17.90   10.50
   2 -11  11   -4.10    5.30
   2 -11  11   -0.90   10.20
   3 -11  11   13.50    4.40
  -4 -10  11   -6.10    5.20
  -4 -10  11    2.50    6.60
  -3 -10  11   11.80    7.20
  -3 -10  11    1.90    8.30
  -2 -10  11   -9.60    9.50
  -2 -10  11    1.00    7.50
  -1 -10  11  103.89   13.60
  -1 -10  11  120.19   13.50
  -1 -10  11  107.39   13.10
   0 -10  11  150.08   14.50
   0 -10  11  178.88   22.20
   1 -10  11  142.49   15.40
   1 -10  11  121.69   17.50
   2 -10  11   -3.00   16.80
   2 -10  11    5.10    7.00
   3 -10  11    6.20    5.30
   3 -10  11    2.30    5.70
  -4  10 -11    7.10   13.00
   4 -10  11    2.10    5.60
  -5  -9  11   34.00    6.90
  -4  -9  11   27.40    7.40
  -4  -9  11   18.40    8.40
  -3  -9  11   -4.30    7.30
  -3  -9  11   -1.20    8.50
  -2  -9  11    3.90    7.10
  -2  -9  11   -2.80    9.40
  -1  -9  11   41.70    9.90
  -1  -9  11   28.20   11.10
  -1  -9  11   29.90    8.00
   0  -9  11   59.69   12.20
   0  -9  11   38.60   10.00
  -1   9 -11   27.50    9.00
   1  -9  11   46.00   10.80
   1  -9  11   27.60   12.10
  -2   9 -11    6.60    8.00
   2  -9  11    6.60    6.20
   2  -9  11    1.70    9.00
   3  -9  11    0.00    7.60
   3  -9  11    1.40    6.70
   4  -9  11   15.90    7.10
  -5   9 -11   22.60   10.90
   5  -9  11   37.50    6.80
  -6  -8  11   16.90    5.60
  -5  -8  11    6.30    7.90
  -5  -8  11   17.90    7.10
  -5  -8  11   12.00    7.90
  -4  -8  11   95.39   11.50
  -3  -8  11   73.29   11.50
  -2  -8  11   64.89   11.70
  -1  -8  11   30.80   10.40
  -1  -8  11   27.60    9.30
   0  -8  11  177.68   16.00
   0  -8  11  225.58   32.20
  -1   8 -11   28.90    8.70
   1  -8  11   40.20   10.50
  -2   8 -11   47.70    9.50
   2  -8  11   69.09    8.80
   2  -8  11   72.59   11.50
  -3   8 -11   80.09   10.60
   3  -8  11   91.19   13.20
   3  -8  11  112.69   15.10
   4  -8  11  122.69   13.60
  -5   8 -11    4.80   11.70
   5  -8  11   14.50    7.10
   6  -8  11   33.30    6.10
  -6  -7  11   15.30    6.80
  -6  -7  11   16.90    8.00
  -5  -7  11    9.00    8.90
  -5  -7  11   10.70    8.90
  -5  -7  11   14.10    6.80
  -4  -7  11   -3.40   11.00
  -4  -7  11    7.30    8.50
  -3  -7  11   95.49   12.30
   0   7 -11   43.50    7.90
   0  -7  11   35.90    9.80
   0  -7  11   75.19   19.00
  -1   7 -11   71.79    9.60
   1  -7  11   80.59   11.70
  -2   7 -11  102.19   12.50
   2  -7  11   93.29   12.90
   2  -7  11  105.89   12.90
  -3   7 -11   91.49   11.10
   3  -7  11  127.79   12.70
   3  -7  11  115.19   14.70
  -4   7 -11    1.00    7.80
   4  -7  11   -9.90    7.20
  -5   7 -11   14.90   11.40
   5  -7  11   18.30    7.50
  -6   7 -11   29.80   12.70
  -6   7 -11    3.80   12.70
   6  -7  11   14.70    6.50
  -7  -6  11   12.70    7.00
  -6  -6  11   45.40    9.50
  -6  -6  11   33.50    8.40
  -6  -6  11   25.10    8.60
  -5  -6  11    8.80    8.80
  -5  -6  11    9.60    9.20
  -5  -6  11    8.40    8.40
  -4  -6  11   49.70   10.10
  -4  -6  11   67.39   11.70
  -4  -6  11   41.60    9.60
  -1  -6  11  131.89   13.80
   0   6 -11   40.20    7.30
   0  -6  11   53.19    9.30
   0  -6  11   58.99   11.40
  -1   6 -11  138.49   12.20
   1  -6  11  106.39   13.70
  -2   6 -11  116.29   13.00
   2  -6  11  105.79   14.50
  -3   6 -11  107.59   12.40
   3  -6  11   94.09   14.70
  -4   6 -11   55.39    9.70
   4  -6  11   75.99    9.60
  -5   6 -11    0.50    9.90
  -5   6 -11    0.70   16.10
   5  -6  11   -1.10    6.90
  -6   6 -11   12.80   15.10
   6  -6  11   44.80    7.90
  -7   6 -11   11.90    8.50
   7  -6  11    4.00    5.90
  -7  -5  11    8.50    7.20
  -7  -5  11   11.10    7.00
  -6  -5  11  131.99   14.60
  -6  -5  11  136.49   18.10
  -5  -5  11  101.59   13.90
  -5  -5  11   89.99   11.80
  -5  -5  11   84.69   11.70
  -4  -5  11   11.00    7.50
  -1  -5  11  103.99   11.50
   0   5 -11   10.00    5.20
   0  -5  11    5.20    6.70
   0  -5  11   -3.50    8.80
  -1   5 -11  106.39   10.70
   1  -5  11  106.09   12.60
  -2   5 -11   91.59   10.80
   2  -5  11   85.89   12.50
  -3   5 -11  210.88   14.00
   3  -5  11  210.48   16.50
  -4   5 -11   14.60    7.50
   4  -5  11   11.40    7.60
   4  -5  11    0.10   10.30
  -5   5 -11  105.79   20.00
  -5   5 -11   95.39   12.80
   5  -5  11  106.29   12.60
  -6   5 -11  166.68   26.00
  -7   5 -11  -13.90   12.90
  -8  -4  11    6.40    6.20
  -7  -4  11    5.10    6.40
  -7  -4  11   -0.30    7.40
  -6  -4  11   49.60    9.80
  -6  -4  11   37.10   10.40
  -6  -4  11   33.20    9.50
  -5  -4  11   19.00    8.50
  -5  -4  11   21.90    8.90
  -5  -4  11   22.40    8.90
  -4  -4  11   22.90    7.50
  -2  -4  11  120.79   11.90
  -1  -4  11  394.96   18.20
   0   4 -11   22.10    5.40
   0  -4  11   19.40    6.60
   0  -4  11   20.60    8.40
  -1   4 -11  395.66   17.30
   1  -4  11  439.96   19.10
  -2   4 -11  128.09   10.40
   2  -4  11  131.99   11.90
  -3   4 -11    0.90    5.90
   3  -4  11    2.90    6.90
  -4   4 -11   29.70    7.00
   4  -4  11   23.60    7.90
  -6   4 -11   41.90   17.60
  -7   4 -11    0.10   14.20
  -8   4 -11   12.10    8.40
   8  -4  11   -2.50    5.10
  -8  -3  11   25.20    7.20
  -7  -3  11   35.00    9.10
  -7  -3  11   48.40    9.50
  -7  -3  11   35.20    9.60
  -6  -3  11  168.58   16.10
  -6  -3  11  176.48   17.90
  -6  -3  11  208.58   17.30
  -5  -3  11   84.99   11.30
  -5  -3  11   84.39   12.80
  -2  -3  11   56.39    8.80
  -1  -3  11   95.89   10.80
   0  -3  11    5.50    5.70
  -1   3 -11  104.19    8.90
   1  -3  11  113.89   10.20
  -2   3 -11   46.10    6.40
   2  -3  11   39.90    6.70
  -3   3 -11   95.79    9.10
   3  -3  11   92.19   10.60
  -4   3 -11   94.79   10.30
   4  -3  11  115.09   11.80
  -6   3 -11  272.07   28.90
  -7   3 -11   47.00   16.40
  -8   3 -11   11.80    9.40
   8  -3  11   36.50    6.60
  -8  -2  11   10.20    6.40
  -8  -2  11   18.10    7.80
  -7  -2  11   70.59   11.30
  -7  -2  11   73.59   10.60
  -7  -2  11   60.69   10.60
  -6  -2  11   39.00   10.20
  -6  -2  11   23.70   10.50
  -6  -2  11   30.20    9.60
   5   2 -11  151.58   16.50
  -5  -2  11  142.89   15.40
  -3  -2  11  537.25   22.10
  -2  -2  11  337.07   15.40
  -1  -2  11  148.39   11.30
   0  -2  11    7.50    5.30
   1  -2  11  137.59    9.60
  -2   2 -11  356.86   15.30
   2  -2  11  379.56   15.50
  -3   2 -11  571.54   21.60
   3  -2  11  588.54   22.00
   4  -2  11   47.10    6.80
  -6   2 -11   41.20   16.40
  -7   2 -11   85.99   17.90
  -8   2 -11   10.20    9.90
   8  -2  11    4.70    5.90
   8   1 -11    1.20    4.90
  -8  -1  11   -6.40    7.20
  -8  -1  11    1.10    5.60
   7   1 -11   21.30    7.30
  -7  -1  11   11.50    8.40
  -7  -1  11   21.30    9.80
  -7  -1  11   15.80    9.60
   6   1 -11   40.30    7.70
  -6  -1  11   37.60   10.20
  -6  -1  11   13.30    9.30
  -6  -1  11   43.00   10.60
   5   1 -11  383.66   21.50
   5   1 -11  336.87   18.00
  -5  -1  11  309.17   19.80
   4   1 -11   70.49   10.30
  -3  -1  11  244.28   13.80
  -2  -1  11  991.30   34.00
  -1  -1  11   66.59    8.20
   0  -1  11  192.28   10.20
   1  -1  11   60.99    6.60
   2  -1  11  898.01   29.70
  -3   1 -11  230.58   11.40
   3  -1  11  231.58   11.00
  -6   1 -11   10.20   15.30
  -7   1 -11   25.20   16.70
   8  -1  11   -0.30    5.70
   8   0 -11   35.70    6.10
  -8   0  11   21.30    6.20
  -8   0  11   23.80    7.70
  -8   0  11   22.70    7.30
   7   0 -11   31.00    7.60
  -7   0  11   32.60   10.20
  -7   0  11   45.80   10.70
  -7   0  11   38.70    9.70
   6   0 -11   89.49   10.70
  -6   0  11   75.09   12.10
  -6   0  11   83.59   11.60
   5   0 -11   48.50   10.20
   5   0 -11   43.70   10.00
  -5   0  11   38.70    9.30
   4   0 -11  102.89   14.20
   4   0 -11   92.89    9.80
   3   0 -11    6.90    6.30
  -2   0  11   19.20    6.20
  -1   0  11  179.98   10.30
   0   0  11   -4.10    3.50
   1   0  11  163.88    7.50
   2   0  11   16.80    2.60
  -6   0 -11   47.00   17.70
   8  -1 -11    2.90    5.30
  -8   1  11    9.00    7.10
  -8   1  11   -3.10    6.70
  -8   1  11    2.80    7.10
   7  -1 -11   21.30    7.10
  -7   1  11    7.70    8.60
  -7   1  11   10.70    8.10
  -7   1  11   13.50    9.80
   6  -1 -11   17.10    7.30
  -6   1  11   20.00    9.50
  -6   1  11   18.20    8.80
   5  -1 -11  328.47   20.40
  -5   1  11  325.17   18.70
   4  -1 -11   71.39    7.60
   4  -1 -11   61.59    9.40
   3  -1 -11  248.78   14.40
   3  -1 -11  249.68   13.10
   2  -1 -11  918.31   32.60
   2  -1 -11  907.91   31.20
   1  -1 -11   73.59    7.70
   1  -1 -11   69.99    7.90
   0  -1 -11  166.28   19.10
   0  -1 -11  166.28   17.00
   8  -2 -11   15.90    5.90
  -8   2  11    9.60    7.00
  -8   2  11   20.10    7.70
   7  -2 -11   83.09    9.30
  -7   2  11   57.99    9.80
  -7   2  11   65.89   12.50
   6  -2 -11   29.90    7.70
  -6   2  11   22.10   10.10
  -6   2  11   54.39   10.20
   5  -2 -11  134.69   15.00
  -5   2  11  152.88   13.50
   4  -2 -11   60.79    9.30
   4  -2 -11   84.39   10.50
   3  -2 -11  588.14   24.50
   3  -2 -11  577.74   22.50
   2  -2 -11  371.06   15.60
   2  -2 -11  344.57   16.40
   1  -2 -11  110.29    9.40
   1  -2 -11  132.59    9.40
   0  -2 -11    1.90    4.30
  -1  -2 -11   97.79    7.10
   8  -3 -11   36.60    6.10
  -8   3  11   31.80    7.30
  -8   3  11   30.20    7.40
   7  -3 -11   40.40    7.60
  -7   3  11   38.00   12.00
   6  -3 -11  213.38   13.80
  -6   3  11  194.38   21.50
  -6   3  11  209.48   17.60
   5  -3 -11   88.99   11.10
  -5   3  11   92.99   13.30
   4  -3 -11  115.29   11.30
   4  -3 -11  109.99   13.00
   3  -3 -11   89.99    9.70
   3  -3 -11   80.19   11.10
   2  -3 -11   61.99    8.80
   2  -3 -11   54.89    7.10
   2  -3 -11   59.39    7.50
   1  -3 -11   82.09    9.00
   1  -3 -11  104.29    8.60
   0  -3 -11    4.00    4.60
   0  -3 -11   17.90    5.10
  -1  -3 -11   87.49    8.20
  -1  -3 -11   96.99    8.20
  -2  -3 -11   53.19    7.00
   8  -4 -11    0.30    5.00
  -8   4  11   11.00    6.10
  -8   4  11    0.50    5.70
   7  -4 -11    5.90    6.50
  -7   4  11   11.40   10.80
   6  -4 -11   34.00    7.80
  -6   4  11   35.30   11.70
   5  -4 -11   16.00    6.10
   5  -4 -11   16.80    6.80
  -5   4  11   18.10    8.40
  -5   4  11   11.90   12.10
   4  -4 -11   17.50    6.80
   4  -4 -11   13.20    7.70
  -4   4  11   21.40    7.80
   3  -4 -11    1.50    5.50
   3  -4 -11   -3.10    5.80
   2  -4 -11  129.69   10.70
   1  -4 -11  409.56   17.60
   1  -4 -11  410.06   17.50
   0  -4 -11   15.70    5.50
   0  -4 -11   16.20    5.70
  -1  -4 -11  375.26   16.20
  -1  -4 -11  360.86   15.60
  -2  -4 -11  116.59   10.70
  -4  -4 -11   22.80    9.20
  -5  -4 -11   14.90    9.90
   7  -5 -11   10.60    5.90
  -7   5  11   19.10   10.90
   6  -5 -11  165.08   12.50
   6  -5 -11  170.48   13.50
  -6   5  11  130.19   15.90
   5  -5 -11  115.49   12.40
  -5   5  11  135.39   16.90
   4  -5 -11   -0.80    6.50
   4  -5 -11    5.20    6.00
   4  -5 -11   -3.90    8.20
  -4   5  11    6.10    7.40
   3  -5 -11  202.28   14.40
  -3   5  11  216.68   15.40
   2  -5 -11   83.19   10.60
   1  -5 -11  106.29   10.70
   0  -5 -11   -1.00    6.10
   0  -5 -11    4.50    6.30
  -1  -5 -11   95.29    9.70
  -1  -5 -11  123.99   12.00
  -2  -5 -11   71.49    8.80
  -3  -5 -11  201.68   17.50
  -4  -5 -11    6.50    9.20
  -5  -5 -11   79.09   11.90
  -5  -5 -11  113.49   16.70
  -6  -5 -11  161.08   17.40
  -7   6  11   16.40   10.40
   6  -6 -11   51.79    7.70
  -6   6  11   61.59   14.30
   5  -6 -11   15.50    6.80
  -5   6  11  -10.70   13.20
   4  -6 -11   66.69    8.70
   4  -6 -11   77.09   11.00
   3  -6 -11   93.59   13.40
  -3   6  11   90.59   11.00
   2  -6 -11  113.29   12.50
  -2   6  11  109.79   13.90
   1  -6 -11  155.08   14.20
   0  -6 -11   38.40    7.90
  -1  -6 -11  131.39   14.50
  -2  -6 -11  102.29   13.80
  -4  -6 -11   56.09   11.30
  -5  -6 -11   -0.80    9.00
  -6  -6 -11   24.90    9.50
   6  -7 -11   12.90    6.20
  -6   7  11   31.00   15.40
   5  -7 -11    1.80    7.60
   5  -7 -11   13.50   10.70
  -5   7  11   25.20   16.20
   4  -7 -11    7.00    7.30
   4  -7 -11   -9.70    8.70
   3  -7 -11  108.69   14.80
   3  -7 -11  106.69   13.90
   3  -7 -11  126.49   16.30
   3  -7 -11  108.79   13.50
   2  -7 -11  112.69   17.40
   2  -7 -11   98.49   11.60
   2  -7 -11   98.49   12.30
  -2   7  11  102.89   14.60
   1  -7 -11   55.79    9.60
   0  -7 -11   42.00    9.20
  -1  -7 -11   89.89   11.90
  -2  -7 -11   78.29   10.50
  -2  -7 -11   85.69   11.60
  -3  -7 -11  136.19   14.30
  -3  -7 -11  115.49   16.80
  -4  -7 -11   -5.00    8.90
  -5  -7 -11   -1.90    8.90
  -6  -7 -11   28.60    8.90
   6  -8 -11   31.20    6.00
  -6   8  11   20.70   14.40
   5  -8 -11   15.70    6.00
   5  -8 -11   22.30    7.80
  -5   8  11   41.30   19.50
   4  -8 -11   88.39   12.20
   4  -8 -11  129.19   14.90
   3  -8 -11   93.79   13.90
   3  -8 -11  113.29   14.30
   3  -8 -11  101.39   14.30
   2  -8 -11   66.29   10.40
   2  -8 -11   54.49   11.50
   2  -8 -11   44.20   11.30
   2  -8 -11   73.09   11.20
   2  -8 -11   76.39   12.90
  -2   8  11   52.69   11.90
   1  -8 -11   18.90    9.10
   1  -8 -11   11.70   10.90
   1  -8 -11   46.10   10.40
   1  -8 -11   27.50   12.70
   1  -8 -11   26.10   10.40
   0  -8 -11  141.99   19.80
   0  -8 -11  167.58   15.70
   0  -8 -11  178.08   19.00
   0  -8 -11  152.08   19.30
  -1  -8 -11   13.00   11.70
  -1  -8 -11   17.80    9.20
  -1  -8 -11   27.10   11.40
  -2  -8 -11   45.90   11.80
  -2  -8 -11   56.79   13.40
  -2  -8 -11   65.59   10.20
  -3  -8 -11   72.09   13.70
  -3  -8 -11   90.59   11.00
  -4  -8 -11  110.39   16.10
  -5  -8 -11   31.50    9.80
  -6  -8 -11   28.00    8.20
   5  -9 -11   30.00    6.40
   5  -9 -11   49.00    7.40
  -5   9  11   23.70   10.80
   4  -9 -11    0.90    6.90
   4  -9 -11   27.20    7.90
   3  -9 -11    8.60   10.10
   3  -9 -11    4.20   11.20
   3  -9 -11    0.00    7.40
   2  -9 -11    1.70   10.60
   2  -9 -11   24.40   11.40
   1  -9 -11   60.49   13.50
   1  -9 -11   49.70   10.50
   1  -9 -11   59.09   12.30
   1  -9 -11   46.60   11.20
  -1   9  11   35.00   11.10
   0  -9 -11   49.50   10.80
   0  -9 -11   34.60   10.00
   0  -9 -11   60.89   14.60
  -1  -9 -11   19.00   11.60
  -1  -9 -11   24.50    9.90
  -2  -9 -11   12.90    9.60
  -2  -9 -11   27.50   11.70
  -3  -9 -11   10.00    8.80
  -3  -9 -11   -6.70    9.90
  -4  -9 -11   19.20    9.90
  -5  -9 -11   17.10    8.70
   4 -10 -11    8.30    5.90
   4 -10 -11    1.90    5.00
   3 -10 -11    7.90    8.00
   2 -10 -11    3.20    9.70
   2 -10 -11  -19.90   10.50
   1 -10 -11  124.79   15.50
   1 -10 -11  132.09   15.30
   1 -10 -11  115.69   17.50
   0 -10 -11  173.08   17.00
   0 -10 -11  167.38   19.80
  -1 -10 -11  122.89   19.00
  -1 -10 -11  148.09   17.20
  -2 -10 -11  -10.40    8.20
  -2 -10 -11    1.70    9.80
  -3 -10 -11    0.30    9.00
  -3 -10 -11   21.90    8.70
  -4 -10 -11    3.10    7.90
   3 -11 -11   40.40    7.10
   2 -11 -11   11.30    7.70
   2 -11 -11    9.10    5.60
   1 -11 -11   21.70    8.10
   1 -11 -11   19.20    8.10
   1 -11 -11   17.70    7.30
   0 -11 -11    5.40    9.10
   0 -11 -11   18.50    7.50
  -1 -11 -11   26.70    7.50
  -1 -11 -11   17.60    9.70
  -2 -11 -11    9.10    9.10
  -2 -11 -11    5.20    6.40
  -3 -11 -11   32.70    8.70
  -3 -11 -11   51.89    7.10
  -3 -11  12   16.00    5.30
  -3 -11  12   15.80    6.10
  -2 -11  12   11.00    8.00
  -2 -11  12   -5.30    6.10
  -1 -11  12   17.80    7.50
  -1 -11  12   14.60   10.30
   0 -11  12   -3.50    7.20
   0 -11  12  -10.20    9.60
   1 -11  12   -2.10    7.30
   1 -11  12   22.30   10.30
   2 -11  12   -0.70    9.60
   2 -11  12    0.20    5.50
  -4 -10  12   12.80    6.90
  -4 -10  12   19.60    6.00
  -3 -10  12    0.60    6.70
  -3 -10  12    6.40    8.30
  -2 -10  12   32.90   10.60
  -2 -10  12   23.30    7.90
  -1 -10  12    3.10   10.60
  -1 -10  12    6.70    7.60
  -1 -10  12   18.30    8.00
   0 -10  12   15.50   12.00
   0 -10  12   -1.00    8.00
   1 -10  12    1.70    9.00
   1 -10  12   33.10   15.60
   2 -10  12   12.10    6.80
   3 -10  12  -10.00    5.50
   3 -10  12    8.10    5.20
  -4  10 -12   12.80   12.50
   4 -10  12   10.60    5.60
  -5  -9  12   33.20    6.70
  -4  -9  12   11.10    6.80
  -4  -9  12   -1.60    7.90
  -3  -9  12   26.30    7.90
  -3  -9  12   40.80    9.90
  -2  -9  12   17.60    7.20
  -2  -9  12   10.70    9.80
  -1  -9  12   82.09   12.80
  -1  -9  12   81.09   11.30
  -1  -9  12   89.39    9.80
   0  -9  12   -2.60    8.90
   0  -9  12   23.30   11.20
  -1   9 -12  120.19   14.00
   1  -9  12   75.59   11.70
   1  -9  12   73.29   13.80
  -2   9 -12   13.20    8.10
   2  -9  12   13.90    6.50
   2  -9  12    9.20    9.40
   3  -9  12   13.20    7.50
   3  -9  12   27.60    7.20
   4  -9  12    1.50    6.50
  -5   9 -12   27.00   10.50
   5  -9  12   32.40    6.60
  -5  -8  12   19.30    8.10
  -5  -8  12   29.70    7.50
  -4  -8  12   76.39   10.90
  -3  -8  12   -8.20    8.90
  -2  -8  12    1.00    9.60
  -1  -8  12   67.49   11.80
  -1  -8  12   85.49   11.60
   0  -8  12   22.60   10.90
   0  -8  12   10.00    9.30
  -1   8 -12   92.99   11.00
   1  -8  12   89.09   12.40
  -2   8 -12   28.40    9.10
   2  -8  12   10.20    7.00
   2  -8  12   31.30   10.00
  -3   8 -12    5.40    8.20
   3  -8  12    1.20    8.90
   3  -8  12    7.00    7.70
   4  -8  12   88.29   10.20
  -5   8 -12   48.30   12.80
   5  -8  12   35.20    7.70
   6  -8  12    2.80    5.10
  -6  -7  12   29.30    8.30
  -6  -7  12   23.20    6.90
  -5  -7  12   15.20    6.20
  -5  -7  12   31.70    9.10
  -5  -7  12   22.10    9.30
  -4  -7  12   19.80    9.20
  -3  -7  12   13.30    9.40
   0   7 -12  117.89   12.50
   0  -7  12  143.89   15.40
  -1   7 -12    7.30    7.40
   1  -7  12  -16.00    8.10
  -2   7 -12   51.69    9.20
   2  -7  12   72.39    9.50
   2  -7  12   83.49   12.20
  -3   7 -12   16.40    8.00
   3  -7  12   16.70    7.80
   3  -7  12   22.90    8.80
  -4   7 -12   14.50    7.90
   4  -7  12   -1.50    7.80
  -5   7 -12   32.70   12.20
   5  -7  12   41.00    8.40
  -6   7 -12   27.70   12.50
   6  -7  12   57.59    7.60
  -7  -6  12   51.89    8.20
  -6  -6  12   15.90    8.70
  -6  -6  12    1.40    7.60
  -6  -6  12   -1.50    7.00
  -5  -6  12   -0.80    7.90
  -5  -6  12    2.30    9.30
  -5  -6  12    9.40    8.70
  -4  -6  12  307.97   23.40
  -4  -6  12  253.37   22.40
  -1  -6  12   59.89    9.50
   0   6 -12    2.80    5.90
   0  -6  12   -3.20    7.70
   0  -6  12  -10.60   10.30
  -1   6 -12   65.99    8.50
   1  -6  12   69.09   10.40
  -2   6 -12   64.79    9.10
   2  -6  12   71.69   11.00
  -3   6 -12  168.98   14.20
   3  -6  12  206.38   22.30
   3  -6  12  160.88   15.20
  -4   6 -12  338.37   19.00
   4  -6  12  306.77   17.90
  -5   6 -12   14.40   16.80
  -5   6 -12    7.10   10.20
   5  -6  12    1.40    7.10
  -6   6 -12   -4.20   15.50
   6  -6  12    4.00    7.30
  -7   6 -12   57.09   10.00
   7  -6  12   60.29    7.80
  -7  -5  12    8.10    6.80
  -7  -5  12   19.30    7.30
  -6  -5  12   60.89   10.00
  -6  -5  12   66.79   11.10
  -6  -5  12   30.10    7.60
  -5  -5  12   24.30    9.20
  -5  -5  12   31.00    9.80
  -5  -5  12   23.80    9.50
  -4  -5  12   71.29   10.10
  -1  -5  12  143.89   12.70
   0   5 -12   20.30    5.90
   0  -5  12   22.00    7.40
   0  -5  12   47.90   10.30
  -1   5 -12  146.49   11.60
   1  -5  12  136.89   13.30
  -2   5 -12  101.39   10.90
   2  -5  12  100.49   12.90
  -3   5 -12  195.28   13.90
   3  -5  12  190.78   16.10
  -4   5 -12  119.69   12.10
   4  -5  12  117.09   13.50
  -5   5 -12   44.30   17.00
  -5   5 -12   16.20    9.90
   5  -5  12   43.10    8.20
  -6   5 -12   99.59   19.50
  -7   5 -12    9.10   13.10
  -7  -4  12   33.80    8.60
  -7  -4  12   11.70    5.60
  -7  -4  12   31.80    9.20
  -6  -4  12   40.80   10.50
  -6  -4  12   42.60   10.10
  -6  -4  12   41.10    9.60
  -5  -4  12   18.50    8.60
  -5  -4  12    9.90    8.90
  -5  -4  12   17.90    8.60
  -4  -4  12   91.89   12.60
  -2  -4  12   73.79   11.10
  -1  -4  12   34.70    7.20
   0   4 -12   -0.50    5.00
   0  -4  12    4.40    6.00
  -1   4 -12   41.80    6.40
   1  -4  12   23.20    7.40
  -2   4 -12   96.29    9.90
   2  -4  12   73.19   11.00
  -3   4 -12   47.60    7.30
   3  -4  12   23.70    7.60
  -4   4 -12   89.19    9.50
   4  -4  12  101.29   12.80
  -5   4 -12    4.10   14.30
  -6   4 -12   44.80   17.80
  -7   4 -12   26.50   15.00
  -8  -3  12   69.59    9.90
  -7  -3  12   32.80    8.80
  -7  -3  12   26.00    9.20
  -7  -3  12   -3.10    7.90
  -6  -3  12    0.60    8.20
  -6  -3  12    9.80    8.50
  -6  -3  12   18.20    9.20
  -5  -3  12   52.39   10.40
  -5  -3  12   53.39   10.20
  -4  -3  12  113.29   13.40
  -2  -3  12   80.19   10.20
  -1  -3  12  427.76   18.80
   0  -3  12    3.30    6.20
  -1   3 -12  412.36   16.80
   1  -3  12  401.66   18.20
  -2   3 -12   80.49    9.20
   2  -3  12  105.39   10.60
  -3   3 -12   -8.70    5.10
   3  -3  12   -3.70    5.90
  -4   3 -12  154.28   11.90
   4  -3  12  158.48   12.90
  -6   3 -12   18.80   15.50
  -7   3 -12   -0.20   15.60
  -8   3 -12   47.30   10.40
   8  -3  12   51.59    6.80
  -8  -2  12   62.09    9.40
  -7  -2  12   69.19   10.90
  -7  -2  12   68.29   10.80
  -7  -2  12   66.69   10.80
  -6  -2  12   12.50    9.10
  -6  -2  12   18.00    9.50
  -6  -2  12   21.20   10.80
   5   2 -12   40.20   10.60
  -5  -2  12   26.60    9.10
  -3  -2  12   96.09   10.60
  -2  -2  12   94.59    9.90
  -1  -2  12  207.18   12.60
   0  -2  12   -1.00    5.30
   1  -2  12  189.38   11.10
  -2   2 -12   86.49    8.50
   2  -2  12   83.49    8.60
  -3   2 -12   97.99    8.80
   3  -2  12  110.79    9.60
  -6   2 -12   33.00   16.10
  -7   2 -12   74.69   18.10
  -8   2 -12   38.10   10.60
   8  -2  12   52.69    7.30
   8   1 -12   -5.00    4.60
  -8  -1  12   -7.00    5.00
  -8  -1  12   -8.40    6.80
   7   1 -12   26.10    7.40
  -7  -1  12   35.50    9.80
  -7  -1  12   43.20   10.60
  -7  -1  12   34.10   10.00
   6   1 -12   82.79   11.40
  -6  -1  12   99.79   15.20
  -6  -1  12   96.09   14.30
  -6  -1  12   67.99   11.50
   5   1 -12  279.57   16.40
   5   1 -12  240.28   19.10
  -5  -1  12  275.47   18.40
   4   1 -12   30.00    8.80
  -3  -1  12   69.59   10.10
  -2  -1  12   15.00    5.90
  -1  -1  12  360.26   14.90
   0  -1  12 1236.78   40.60
   1  -1  12  379.06   14.50
  -2   1 -12   11.30    5.00
   2  -1  12   11.00    4.20
  -3   1 -12   77.59    8.60
   3  -1  12   60.99    7.00
  -6   1 -12   33.60   16.30
  -7   1 -12   37.30   16.80
  -8   1 -12   14.20   13.60
   8  -1  12    3.70    5.60
   8   0 -12    2.40    4.90
  -8   0  12    5.60    5.50
  -8   0  12   10.90    6.80
  -8   0  12   16.70    7.40
   7   0 -12   30.90    7.60
  -7   0  12   57.29   11.20
  -7   0  12   41.60   10.80
  -7   0  12   39.40   10.30
   6   0 -12   -1.90    6.50
  -6   0  12   11.60    9.30
  -6   0  12   -0.10    8.50
   5   0 -12   75.49    9.00
   5   0 -12   83.39   12.20
  -5   0  12   83.69   10.90
   4   0 -12   -2.80    7.40
   4   0 -12    3.80    5.40
   3   0 -12   13.90    6.80
  -2   0  12   28.80    6.60
  -1   0  12 1127.49   37.40
   0   0  12  146.69    8.00
   1   0  12 1018.40   32.60
  -3   0 -12    5.90    4.80
  -6   0 -12   14.90   15.90
   8  -1 -12    1.50    5.20
  -8   1  12   -5.40    6.40
  -8   1  12    4.60    7.00
   7  -1 -12   32.80    7.70
  -7   1  12   38.40   10.10
  -7   1  12   47.50   11.20
  -7   1  12   24.00    9.00
   6  -1 -12   81.59   10.70
  -6   1  12   86.59   12.10
  -6   1  12   66.99   11.60
   5  -1 -12  220.28   17.60
  -5   1  12  237.88   16.50
   4  -1 -12   25.80    8.50
   4  -1 -12   29.40    6.20
   3  -1 -12   80.29   11.40
   3  -1 -12   83.69    9.40
   2  -1 -12   16.00    5.60
   2  -1 -12    8.90    5.10
   1  -1 -12  339.47   14.90
   1  -1 -12  376.26   14.60
   0  -1 -12 1096.79   45.30
   0  -1 -12 1179.58   45.10
   8  -2 -12   64.19    8.00
  -8   2  12   83.79   10.10
  -8   2  12   64.79    8.70
   7  -2 -12   77.89   10.80
  -7   2  12   81.89   13.40
  -7   2  12   58.89   10.20
   6  -2 -12   12.40    6.90
  -6   2  12   12.40    9.60
  -6   2  12   27.80    9.40
   5  -2 -12   26.40    9.50
   5  -2 -12   36.90    9.50
  -5   2  12   40.70    8.60
   4  -2 -12   17.50    8.10
   4  -2 -12   17.80    6.10
   3  -2 -12   89.99   11.50
   3  -2 -12  106.29   10.20
   2  -2 -12   74.09    9.60
   2  -2 -12   75.59    9.70
   2  -2 -12   84.59    9.20
   1  -2 -12  180.08   10.70
   0  -2 -12    2.50    4.40
  -1  -2 -12  164.18    8.90
  -2  -2 -12   62.09    7.20
   8  -3 -12   65.49    7.60
  -8   3  12   88.09   12.20
  -8   3  12   71.29    9.30
   7  -3 -12   13.60    7.10
  -7   3  12   19.60   11.40
  -7   3  12   13.50    8.20
   6  -3 -12   18.60    7.30
  -6   3  12    2.60   10.10
  -6   3  12   12.50    9.00
   5  -3 -12   36.70    7.50
   5  -3 -12   42.80    7.00
  -5   3  12   25.80    8.70
   4  -3 -12  158.58   14.20
   4  -3 -12  161.98   12.30
  -4   3  12  152.38   13.60
   3  -3 -12    2.70    6.30
   3  -3 -12   -3.30    5.40
   2  -3 -12   79.99    9.20
   2  -3 -12   75.29    9.60
   2  -3 -12   93.99    9.50
   1  -3 -12  397.16   16.40
   1  -3 -12  396.46   16.60
   0  -3 -12    0.00    4.50
   0  -3 -12    4.80    4.90
  -1  -3 -12  341.17   14.70
  -1  -3 -12  362.86   14.90
  -2  -3 -12   73.29    7.50
   7  -4 -12   48.80    7.60
  -7   4  12   23.40   11.40
   6  -4 -12   56.99    8.60
  -6   4  12   37.00   12.00
  -6   4  12   61.79   10.40
   5  -4 -12   21.70    6.40
   5  -4 -12   20.00    6.70
  -5   4  12   22.20   12.60
  -5   4  12   28.90    8.50
   4  -4 -12   85.19   11.80
   4  -4 -12   75.49   10.00
  -4   4  12   72.69    9.60
   3  -4 -12   40.00    7.00
   3  -4 -12   45.80    7.80
   2  -4 -12   80.29    9.80
   1  -4 -12   34.90    6.60
   1  -4 -12   31.90    6.10
   0  -4 -12   -2.20    5.10
   0  -4 -12    1.30    5.30
  -1  -4 -12   29.30    5.90
  -1  -4 -12   30.90    6.20
  -2  -4 -12   85.59   10.60
  -4  -4 -12   68.39   10.90
  -5  -4 -12   19.20    9.90
   7  -5 -12   17.10    6.10
  -7   5  12   32.80   11.90
   6  -5 -12   64.09    8.80
   6  -5 -12   90.99   12.30
  -6   5  12   78.59   14.30
   5  -5 -12   38.90    7.20
  -5   5  12   45.80   14.30
  -5   5  12   26.30    8.80
   4  -5 -12  101.19   11.70
   4  -5 -12  121.69   14.30
   4  -5 -12  122.49   13.60
  -4   5  12  115.09   13.60
   3  -5 -12  177.48   13.50
  -3   5  12  201.18   14.90
   2  -5 -12   85.49   10.90
   1  -5 -12  146.59   11.70
   0  -5 -12   16.80    6.60
   0  -5 -12   13.50    6.60
  -1  -5 -12  155.98   13.20
  -1  -5 -12  165.38   11.20
  -2  -5 -12   86.89    9.40
  -4  -5 -12  116.59   16.70
  -5  -5 -12   26.80   10.90
  -7   6  12   80.89   12.80
   6  -6 -12   -2.20    5.80
  -6   6  12   14.00   13.60
   5  -6 -12   12.10    6.80
  -5   6  12   20.50   14.50
   4  -6 -12  321.47   17.80
   4  -6 -12  316.77   19.90
  -4   6  12  325.37   19.20
   3  -6 -12  171.68   14.90
   3  -6 -12  171.48   16.00
  -3   6  12  177.38   15.00
   2  -6 -12   70.59    9.40
  -2   6  12   75.89   10.80
   1  -6 -12   58.39    8.90
   0  -6 -12   -3.10    6.40
  -1  -6 -12   63.99    9.50
  -2  -6 -12   61.59    9.70
  -4  -6 -12  295.47   20.60
  -5  -6 -12   12.50    9.80
   6  -7 -12   73.19   10.50
  -6   7  12   70.49   17.90
   5  -7 -12   40.30    8.70
   5  -7 -12   30.20    8.60
  -5   7  12   59.79   18.00
   4  -7 -12   27.60   10.10
   4  -7 -12    6.10    7.40
   3  -7 -12    5.50    6.80
   3  -7 -12   -6.30    9.70
   3  -7 -12   -1.10    9.00
   3  -7 -12    2.10    9.40
  -3   7  12    0.10    8.40
   2  -7 -12   63.29    8.40
   2  -7 -12   68.39   11.20
   2  -7 -12   60.79    9.70
   2  -7 -12   60.99   10.40
   2  -7 -12   59.39   11.60
  -2   7  12   71.39   11.10
   1  -7 -12   -1.40    8.10
   0  -7 -12  108.49   14.40
  -1  -7 -12  -11.10    8.60
  -2  -7 -12   48.50   10.80
  -2  -7 -12   62.59   12.80
  -2  -7 -12   73.39    9.90
  -3  -7 -12   16.30    7.80
  -3  -7 -12   22.30   10.20
  -4  -7 -12    0.90    9.30
  -5  -7 -12   39.60   10.60
  -6  -7 -12   38.50   10.50
   6  -8 -12    6.10    5.30
  -6   8  12    5.10   14.00
   5  -8 -12   13.60    5.70
   5  -8 -12   21.50    7.60
  -5   8  12   53.49   20.50
   4  -8 -12   75.29   11.60
   4  -8 -12   98.19   14.30
   3  -8 -12   10.50    7.40
   3  -8 -12   18.50   10.30
   3  -8 -12    0.30   10.20
   2  -8 -12   25.00   10.40
   2  -8 -12   10.50    9.60
   2  -8 -12   20.30   10.80
   2  -8 -12   12.70    8.60
  -2   8  12   21.40   10.20
   1  -8 -12  109.29   15.20
   1  -8 -12   81.09   12.30
   1  -8 -12   75.39   12.60
   1  -8 -12   88.69   15.10
   1  -8 -12   73.99   11.90
   0  -8 -12   22.40    9.90
   0  -8 -12    4.90   11.70
   0  -8 -12   11.60   10.20
   0  -8 -12   14.70    8.70
  -1  -8 -12   81.89   11.70
  -1  -8 -12   99.09   13.40
  -1  -8 -12   95.89   14.50
  -2  -8 -12   34.90   12.00
  -2  -8 -12   14.90    8.80
  -2  -8 -12   20.10   10.80
  -3  -8 -12   13.10    8.70
  -3  -8 -12    4.20   10.40
  -4  -8 -12   51.99   11.70
  -5  -8 -12   27.40    9.70
  -6  -8 -12   -3.60    7.20
   5  -9 -12   23.50    6.10
   5  -9 -12   35.00    6.80
  -5   9  12   47.20   10.90
   4  -9 -12    6.10    6.70
   4  -9 -12  -11.70    7.00
   3  -9 -12   46.00    9.10
   3  -9 -12   36.60   11.20
   3  -9 -12   47.60   12.80
   2  -9 -12    9.70    8.60
   2  -9 -12   -0.20   10.40
   2  -9 -12   -3.30   10.60
   1  -9 -12  112.79   13.80
   1  -9 -12  109.99   16.10
   1  -9 -12  107.79   15.90
  -1   9  12  102.39   13.20
   0  -9 -12   -7.00    8.40
   0  -9 -12   17.90   13.10
  -1  -9 -12   91.89   14.60
  -1  -9 -12  112.69   16.60
  -2  -9 -12   13.50    9.50
  -2  -9 -12   17.40   10.80
  -3  -9 -12   21.40   10.90
  -3  -9 -12   33.20    9.60
  -4  -9 -12   -2.90    9.40
  -5  -9 -12   35.40    9.10
   4 -10 -12   10.50    5.00
   4 -10 -12   22.10    5.80
   3 -10 -12    1.70    8.00
   2 -10 -12   24.40   11.90
   2 -10 -12   36.30   10.50
   1 -10 -12    2.40    8.50
   1 -10 -12   11.70   11.70
   1 -10 -12   17.90    9.50
   0 -10 -12    5.00    9.00
   0 -10 -12   18.60   11.70
  -1 -10 -12    9.30   11.70
  -1 -10 -12    1.40    9.30
  -2 -10 -12   31.30    9.60
  -2 -10 -12   13.70   10.10
  -3 -10 -12   12.10    9.20
  -3 -10 -12    5.40    8.00
  -4 -10 -12   15.90    8.20
   3 -11 -12   23.50    6.40
   2 -11 -12    3.50    7.30
   2 -11 -12    4.90    6.70
   1 -11 -12   28.20    8.20
   1 -11 -12    8.10    7.00
   1 -11 -12   10.30    8.70
   0 -11 -12   11.10    7.30
   0 -11 -12    2.20    9.00
  -1 -11 -12   14.50    6.90
  -1 -11 -12   32.70   10.10
  -2 -11 -12   14.30    6.50
  -2 -11 -12    3.60    8.80
  -3 -11 -12   17.80    8.00
  -3 -11 -12   10.10    6.00
  -2 -11  13    4.90    8.00
  -2 -11  13  -11.80    5.70
  -1 -11  13    0.60    6.70
  -1 -11  13    5.20   10.00
   0 -11  13   -1.30    9.00
   0 -11  13    9.50    7.60
   1 -11  13    7.00    7.30
   1 -11  13    7.30    9.80
   2 -11  13   -3.40    9.10
   2 -11  13   -2.90    4.80
  -4 -10  13   -5.10    6.40
  -4 -10  13   -5.10    4.70
  -3 -10  13    6.70    6.60
  -3 -10  13   17.70    8.80
  -2 -10  13   20.10   10.50
  -2 -10  13   22.70    7.70
  -1 -10  13    4.80    7.30
  -1 -10  13   21.00   11.40
   0 -10  13   78.09   13.80
   0 -10  13   95.39   14.00
   1 -10  13   27.80    9.60
   1 -10  13   22.90   15.20
   2 -10  13    9.10    8.00
   2 -10  13   18.20    7.50
   3 -10  13   13.60    5.80
   3 -10  13    9.60    5.20
  -4  10 -13  -10.00   11.00
   4 -10  13   -9.80    5.00
  -5  -9  13   38.80    7.20
  -5  -9  13   27.30    6.30
  -4  -9  13   10.00    8.20
  -4  -9  13   12.40    6.80
  -3  -9  13   48.40    8.50
  -3  -9  13   54.89   10.60
  -2  -9  13    7.30    7.20
  -2  -9  13   -3.50    9.40
  -1  -9  13   45.10    8.30
  -1  -9  13   37.70   11.30
  -1  -9  13   37.90    9.70
   0  -9  13   21.60   11.60
   0  -9  13   16.70    9.50
  -1   9 -13   28.40    8.80
   1  -9  13   35.50   10.70
   1  -9  13   28.00   13.10
   2  -9  13    8.80    9.00
   2  -9  13   -7.60    6.00
   3  -9  13   42.10    7.70
   3  -9  13   37.20    8.10
   4  -9  13    7.10    6.70
  -5   9 -13   35.40   10.30
   5  -9  13   40.80    6.80
  -6  -8  13   11.50    8.40
  -5  -8  13   13.10    7.20
  -5  -8  13   34.80    8.40
  -4  -8  13   13.40    9.10
  -3  -8  13   47.20   11.10
  -2  -8  13   16.30   10.20
  -1  -8  13   40.20   11.20
  -1  -8  13   46.70   10.10
   0  -8  13   -4.00   10.20
   0  -8  13    3.90    9.00
  -1   8 -13   56.59    9.70
   1  -8  13   43.70   10.80
   1  -8  13   60.49   13.20
  -2   8 -13   18.40    8.40
   2  -8  13   17.30    9.40
   2  -8  13   22.10    7.30
  -3   8 -13   64.19   10.30
   3  -8  13   61.99    9.40
   3  -8  13   43.70   10.30
   4  -8  13   -5.50    7.50
  -5   8 -13   33.30   12.40
   5  -8  13   34.90    7.60
   6  -8  13    2.80    5.10
  -6  -7  13   51.59    8.10
  -6  -7  13   49.20    8.70
  -6  -7  13   55.79    7.80
  -6  -7  13   37.20    7.40
  -5  -7  13   -7.70    8.40
  -4  -7  13   15.60    9.70
  -3  -7  13   61.59   11.50
  -2  -7  13  339.97   25.60
   0   7 -13    1.50    6.30
   0  -7  13   10.60    9.10
  -1   7 -13  127.69   12.90
   1  -7  13  142.69   15.60
   1  -7  13  132.59   16.30
  -2   7 -13  376.36   20.20
   2  -7  13  383.06   19.40
   2  -7  13  363.96   21.60
  -3   7 -13  117.69   13.40
   3  -7  13   75.59   11.30
   3  -7  13   95.29   13.40
  -4   7 -13   35.00    8.80
   4  -7  13   25.00    8.70
  -5   7 -13   -6.40   11.40
   5  -7  13    5.60    7.00
  -6   7 -13   33.80   12.30
   6  -7  13   66.39    7.90
  -7  -6  13    8.10    6.40
  -6  -6  13   29.00    8.60
  -6  -6  13    9.60    8.60
  -6  -6  13    9.30    7.40
  -5  -6  13    3.00    8.30
  -5  -6  13   -2.50    8.10
  -5  -6  13    4.80    9.40
  -4  -6  13   24.60   10.10
  -1  -6  13   26.50    8.30
   0   6 -13   57.19    7.80
   0  -6  13   61.19   10.00
  -1   6 -13   22.90    6.90
   1  -6  13   15.10    8.40
  -2   6 -13  435.96   21.10
   2  -6  13  426.96   23.60
  -3   6 -13   64.99    9.70
   3  -6  13   77.09   11.90
  -4   6 -13   23.40    8.00
   4  -6  13   34.50    8.50
  -5   6 -13  -15.40   16.40
  -5   6 -13    9.30   10.50
   5  -6  13   11.50    7.60
  -6   6 -13   11.60   15.70
  -7   6 -13   10.10    8.50
   7  -6  13   17.40    5.90
  -7  -5  13   51.59    8.40
  -7  -5  13   37.20    7.50
  -6  -5  13   11.80    6.70
  -6  -5  13   30.80   10.30
  -6  -5  13   16.10    8.20
  -5  -5  13   94.19   14.00
  -5  -5  13  102.19   12.70
  -5  -5  13  118.39   13.20
  -4  -5  13   17.40    8.30
  -2  -5  13  105.69   12.30
  -1  -5  13   48.10    8.50
   0   5 -13  140.09   10.10
   0  -5  13  135.49   13.60
  -1   5 -13   59.89    7.70
   1  -5  13   48.40    8.90
  -2   5 -13  124.59   11.40
   2  -5  13   75.89   10.20
  -3   5 -13  112.99   12.80
   3  -5  13   97.99   14.30
  -4   5 -13   36.10    8.30
   4  -5  13   43.90    8.70
  -5   5 -13  130.79   20.30
  -5   5 -13   69.69   16.30
   5  -5  13   98.69   12.80
  -6   5 -13   15.70   16.50
  -7   5 -13   40.50   14.30
  -7  -4  13   15.20    8.80
  -7  -4  13    6.30    6.80
  -7  -4  13    2.70    7.50
  -6  -4  13    6.30    8.40
  -6  -4  13   20.70    9.10
  -6  -4  13   13.30    9.30
  -5  -4  13   28.90    9.00
  -5  -4  13   40.00   10.10
  -5  -4  13   30.60    9.50
  -4  -4  13  169.88   14.70
  -2  -4  13  153.48   12.80
  -1  -4  13  171.18   13.10
   0   4 -13   89.69    8.80
   0  -4  13  107.79   11.40
  -1   4 -13  185.98   11.60
   1  -4  13  189.38   13.80
  -2   4 -13  229.08   12.80
   2  -4  13  189.88   14.50
  -3   4 -13   43.00    7.60
   3  -4  13   49.99    8.50
  -4   4 -13  171.08   13.10
   4  -4  13  147.69   14.40
  -5   4 -13   44.80   16.30
  -6   4 -13   16.00   16.90
  -7   4 -13   23.50   15.10
  -8  -3  13   22.00    6.70
  -7  -3  13   -2.60    6.90
  -7  -3  13    2.40    8.30
  -7  -3  13   12.20    8.30
  -6  -3  13  105.79   16.80
  -6  -3  13   96.79   12.70
  -6  -3  13  111.09   14.00
  -5  -3  13   16.80    9.00
  -5  -3  13   20.40    9.10
  -4  -3  13    3.10    7.20
  -3  -3  13   25.50    6.90
  -2  -3  13  137.89   11.40
  -1  -3  13  714.93   27.00
   0   3 -13   75.49    7.60
   0  -3  13   80.29   10.20
  -1   3 -13  685.73   25.00
   1  -3  13  695.13   26.00
  -2   3 -13  126.79    9.90
   2  -3  13  114.29   11.10
  -3   3 -13   33.90    6.40
   3  -3  13   39.50    7.20
  -4   3 -13    1.10    6.10
   4  -3  13    7.80    6.60
  -6   3 -13  122.79   19.90
  -7   3 -13   13.80   16.00
  -8   3 -13    8.90    9.60
   8  -3  13   19.80    5.80
  -8  -2  13   17.90    7.20
  -7  -2  13    1.60    8.00
  -7  -2  13    8.70    8.90
  -7  -2  13    4.50    8.80
   6   2 -13   44.20    8.50
  -6  -2  13   38.80   10.40
  -6  -2  13   31.20   10.20
  -6  -2  13   12.70   10.50
  -5  -2  13  114.69   15.50
  -3  -2  13  145.39   11.90
  -2  -2  13   55.89    7.20
  -1  -2  13  181.28   12.20
   0  -2  13  607.44   22.60
  -1   2 -13  136.99    8.70
   1  -2  13  147.89   10.20
  -2   2 -13   56.79    8.00
   2  -2  13   62.89    8.60
  -3   2 -13  159.78   10.70
   3  -2  13  161.98   10.80
  -6   2 -13   34.30   16.50
  -7   2 -13   -4.40   16.00
  -8   2 -13   -1.00    9.30
   8  -2  13    8.70    5.60
   8   1 -13   60.59    7.30
  -8  -1  13   59.89    8.80
  -8  -1  13   55.69   10.30
  -8  -1  13   54.69    7.90
   7   1 -13   -2.60    6.20
  -7  -1  13    8.40    9.90
  -7  -1  13   16.50    9.00
  -7  -1  13    6.70    8.40
   6   1 -13   70.99    9.20
  -6  -1  13   59.29   11.20
  -6  -1  13   67.79   12.00
  -6  -1  13   57.49   11.40
   5   1 -13   73.49    9.20
   5   1 -13   78.79   12.20
  -5  -1  13   67.29   10.40
   4   1 -13   56.09    9.60
  -3  -1  13   26.40    6.90
  -2  -1  13   48.00    7.20
  -1  -1  13  886.81   30.30
   0  -1  13   26.60    5.40
   1  -1  13 1249.28   40.70
  -2   1 -13   58.99    6.50
   2  -1  13   43.90    6.70
  -3   1 -13   25.40    5.90
  -6   1 -13   67.89   18.20
  -7   1 -13    6.30   15.90
  -8   1 -13   47.00   11.10
   8  -1  13   50.59    7.10
   8   0 -13   62.39    7.80
  -8   0  13   73.79    8.80
  -8   0  13   45.10    8.50
  -8   0  13   74.19   10.10
   7   0 -13   48.10    8.20
  -7   0  13   43.20   10.60
  -7   0  13   46.70   10.60
  -7   0  13   42.70   11.40
   6   0 -13   32.40    7.70
  -6   0  13   46.40   11.10
  -6   0  13   43.00   10.60
   5   0 -13   48.10   10.90
   5   0 -13   54.79    8.10
  -5   0  13   44.10    9.70
   4   0 -13  148.29   12.20
   4   0 -13  144.09   15.40
   3   0 -13   81.29   11.50
  -2   0  13   91.09   10.00
  -1   0  13   94.09    9.20
   0   0  13    3.50    3.90
   1   0  13   74.59    5.40
  -2   0 -13   76.89    7.50
  -3   0 -13   55.09    7.50
  -6   0 -13    0.90   15.40
   8  -1 -13   63.29    8.10
  -8   1  13   56.99    8.50
  -8   1  13   50.39    8.20
   7  -1 -13   19.50    7.20
  -7   1  13    7.60    7.90
  -7   1  13    0.60   10.20
  -7   1  13   -1.30    8.60
   6  -1 -13   65.99    8.70
  -6   1  13   47.10   10.90
  -6   1  13   71.49   11.40
   5  -1 -13   87.59   11.20
   5  -1 -13   85.59   11.80
  -5   1  13   74.29   10.20
   4  -1 -13   60.29    7.40
   4  -1 -13   58.29    9.20
   3  -1 -13   27.50    7.70
   3  -1 -13   21.40    5.80
   2  -1 -13   46.40    5.90
   2  -1 -13   39.00    6.90
   1  -1 -13 1114.29   37.90
   1  -1 -13 1128.89   37.20
   0  -1 -13   16.80    4.60
  -2  -1 -13   44.90    5.40
   8  -2 -13   12.90    5.60
  -8   2  13   19.90    6.90
  -8   2  13   22.50    7.40
   7  -2 -13    6.30    6.90
  -7   2  13   -0.80   10.60
  -7   2  13  -10.50    6.90
   6  -2 -13   41.80    7.90
  -6   2  13   50.49   10.80
  -6   2  13   43.40   11.30
   5  -2 -13  105.29   11.20
  -5   2  13  103.59   13.60
   4  -2 -13   36.10    6.90
   4  -2 -13   47.60    9.00
   3  -2 -13  148.09   13.10
   3  -2 -13  172.38   11.30
   2  -2 -13   49.10    6.90
   2  -2 -13   48.30    5.90
   2  -2 -13   48.40    6.20
   1  -2 -13  162.88   10.30
   1  -2 -13  136.39   12.30
   0  -2 -13  531.45   19.70
  -1  -2 -13  141.29    8.70
  -1  -2 -13  137.29    8.70
  -2  -2 -13   56.19    7.50
   8  -3 -13   29.70    5.70
  -8   3  13   17.70    6.40
  -8   3  13   24.90    7.00
   7  -3 -13    4.60    6.80
  -7   3  13   23.50   11.40
  -7   3  13    2.10    7.40
   6  -3 -13  139.59   12.50
  -6   3  13  125.69   21.00
  -6   3  13  133.89   15.60
   5  -3 -13   18.70    6.70
   5  -3 -13   21.00    6.30
  -5   3  13   18.50    8.20
   4  -3 -13   17.50    6.40
   4  -3 -13   11.20    7.30
  -4   3  13   22.40    7.50
   3  -3 -13   33.30    7.70
   3  -3 -13   40.50    6.90
   2  -3 -13  107.69    9.80
   2  -3 -13  113.59   10.20
   1  -3 -13  643.84   23.60
   1  -3 -13  638.74   23.60
   0  -3 -13   67.69    8.50
   0  -3 -13   85.89    8.70
  -1  -3 -13  569.64   21.00
  -1  -3 -13  570.44   21.10
  -2  -3 -13  117.69    8.40
   7  -4 -13    5.10    6.50
  -7   4  13   17.50   11.40
   6  -4 -13    1.20    6.90
  -6   4  13   21.20   11.80
  -6   4  13   19.40    8.70
   5  -4 -13   58.39    8.20
   5  -4 -13   52.19    7.60
  -5   4  13   38.40    9.40
  -5   4  13   38.40   13.30
   4  -4 -13  175.38   15.50
   4  -4 -13  183.78   14.30
  -4   4  13  186.78   15.00
   3  -4 -13   50.19    7.40
   2  -4 -13  198.28   12.70
   1  -4 -13  204.18   12.40
   1  -4 -13  197.58   12.10
   0  -4 -13   93.09    9.60
   0  -4 -13   98.59    9.50
  -1  -4 -13  180.58   11.70
  -1  -4 -13  191.28   11.80
  -2  -4 -13  152.28   12.60
  -4  -4 -13  165.38   16.40
   7  -5 -13   51.39    6.90
  -7   5  13   55.89   12.40
   6  -5 -13   37.50    7.90
   6  -5 -13   29.90    7.10
  -6   5  13   42.90   13.50
   5  -5 -13  113.79   12.90
  -5   5  13  141.89   15.10
  -5   5  13  139.99   17.70
   4  -5 -13   39.50    9.00
   4  -5 -13   29.70    7.90
   4  -5 -13   16.60    6.50
  -4   5  13   21.50    8.30
   3  -5 -13   99.69   11.80
  -3   5  13  107.39   13.00
   2  -5 -13   93.79   11.80
   1  -5 -13   47.10    7.60
   0  -5 -13  139.59   12.20
   0  -5 -13  141.49   11.80
  -1  -5 -13   45.50    7.70
  -1  -5 -13   59.09    7.50
  -2  -5 -13   92.69   12.40
  -7   6  13   18.20   11.30
   6  -6 -13   27.60    6.70
  -6   6  13   18.60   14.80
   5  -6 -13   14.30    7.10
  -5   6  13  -18.20   14.00
   4  -6 -13   34.00    9.70
   4  -6 -13   30.30    7.20
  -4   6  13   19.90    8.80
   3  -6 -13   65.89   11.60
   3  -6 -13   73.19    8.90
   3  -6 -13   77.29    9.70
   3  -6 -13   85.49   11.70
  -3   6  13   67.89   10.10
   2  -6 -13  413.56   20.00
  -2   6  13  391.56   21.40
   1  -6 -13   30.00    7.90
   0  -6 -13   66.99    9.30
  -1  -6 -13   16.20    8.20
  -2  -6 -13  407.16   21.20
  -4  -6 -13   32.20   11.00
   6  -7 -13   53.69    7.20
  -6   7  13   82.19   16.90
   5  -7 -13    4.60    7.40
   5  -7 -13    0.50    7.40
  -5   7  13  -14.10   16.60
   4  -7 -13   27.00    7.90
   4  -7 -13   52.09   11.00
   3  -7 -13   62.89   12.10
   3  -7 -13   99.09   12.00
   3  -7 -13   88.29    9.80
   3  -7 -13  100.09   14.50
  -3   7  13   97.09   11.90
   2  -7 -13  388.16   22.10
   2  -7 -13  370.26   18.90
   2  -7 -13  353.26   20.50
   2  -7 -13  381.76   22.00
   2  -7 -13  371.86   22.10
  -2   7  13  378.36   21.30
   1  -7 -13  125.89   15.70
   1  -7 -13  150.78   21.10
   0  -7 -13    4.10    8.00
  -1  -7 -13  129.79   16.90
  -2  -7 -13  425.36   22.90
  -2  -7 -13  405.16   24.70
  -2  -7 -13  371.96   21.30
  -3  -7 -13  123.39   17.30
  -3  -7 -13   80.49   10.70
  -4  -7 -13   23.00   10.30
  -5  -7 -13   -0.20    8.90
   6  -8 -13    3.90    5.20
  -6   8  13    9.40    8.30
   5  -8 -13   58.69    8.60
   5  -8 -13   33.50    7.80
  -5   8  13   18.70   19.60
   4  -8 -13   -4.10    8.30
   4  -8 -13   11.00    7.90
   3  -8 -13   55.29    8.90
   3  -8 -13   67.19   12.20
   3  -8 -13   37.90   12.00
   2  -8 -13   27.70   10.80
   2  -8 -13   28.80    9.10
   2  -8 -13   32.60   11.00
   2  -8 -13   38.30   10.50
  -2   8  13   22.90   10.30
   1  -8 -13   42.70   10.10
   1  -8 -13   60.39   11.50
   1  -8 -13   52.09   13.10
   1  -8 -13   70.39   11.90
   0  -8 -13   13.60   10.00
   0  -8 -13   13.80    9.00
   0  -8 -13   -0.20   11.80
   0  -8 -13   20.30    9.60
  -1  -8 -13   53.69   13.30
  -1  -8 -13   46.70   11.60
  -1  -8 -13   63.19   10.50
  -2  -8 -13   14.20   11.60
  -2  -8 -13   47.10   11.60
  -2  -8 -13   41.80    9.90
  -3  -8 -13   55.89   12.70
  -3  -8 -13   52.09   10.20
  -4  -8 -13   11.10   10.40
  -5  -8 -13   31.00    9.70
   5  -9 -13   27.30    6.40
   5  -9 -13   46.30    6.80
  -5   9  13   55.99   10.60
   4  -9 -13    4.40    6.50
   4  -9 -13   14.80    7.30
   3  -9 -13   72.09    9.50
   3  -9 -13   57.19   11.90
   3  -9 -13   81.59   14.00
   2  -9 -13    5.80    8.60
   2  -9 -13    1.60   10.80
   2  -9 -13   -7.00    9.80
   1  -9 -13   29.30   10.10
   1  -9 -13   56.99   14.40
   1  -9 -13   34.40   11.20
  -1   9  13   36.40   10.90
   0  -9 -13    6.30    9.40
   0  -9 -13    4.50   11.70
  -1  -9 -13   30.30   10.50
  -1  -9 -13   38.40   13.10
  -2  -9 -13   -4.60    8.60
  -2  -9 -13  -13.10   10.30
  -3  -9 -13   57.99   10.30
  -3  -9 -13   34.70   11.20
  -4  -9 -13   -6.40    8.80
  -5  -9 -13   39.80    8.90
   4 -10 -13   -5.30    4.60
   4 -10 -13   -1.20    5.20
   3 -10 -13   16.60    8.10
   2 -10 -13   36.10   12.20
   2 -10 -13   25.70   10.20
   1 -10 -13   19.30    9.20
   1 -10 -13    4.90   10.60
   1 -10 -13   10.90    8.90
   0 -10 -13   93.19   14.40
   0 -10 -13   86.89   11.30
   0  10  13   85.09   11.40
  -1 -10 -13   21.50   11.50
  -1 -10 -13   30.60    9.60
  -2 -10 -13   34.40    9.50
  -2 -10 -13   35.30   11.40
  -3 -10 -13   18.80    9.50
  -3 -10 -13   14.00    7.90
  -4 -10 -13  -12.60    7.40
   2 -11 -13    8.70    7.30
   2 -11 -13    6.50    6.90
   1 -11 -13    7.80    8.90
   1 -11 -13   10.60    6.90
   1 -11 -13    3.10    7.10
   0 -11 -13   -2.70    6.70
   0 -11 -13   -4.30    8.50
  -1 -11 -13   19.00    6.90
  -1 -11 -13   32.50    9.60
  -2 -11 -13  -19.50    7.80
  -2 -11 -13    2.10    6.00
  -2 -11  14    8.50    8.10
  -2 -11  14   -3.60    5.80
  -1 -11  14   27.90    9.90
  -1 -11  14   15.30    7.00
   0 -11  14   -4.00    7.00
   0 -11  14    6.90    9.00
   1 -11  14   13.10    7.20
   1 -11  14   22.00    9.70
   2 -11  14   -4.30    4.90
   2 -11  14   10.20   10.50
  -4 -10  14    3.40    4.80
  -4 -10  14   -6.00    6.40
  -3 -10  14   38.90    7.30
  -3 -10  14   30.50    9.20
  -2 -10  14    9.00    7.20
  -2 -10  14    4.10   10.30
  -1 -10  14   32.70   12.20
  -1 -10  14   26.10    8.50
   0 -10  14   22.80   12.40
   0 -10  14   26.40    8.80
   1 -10  14   33.90    9.60
   1 -10  14   34.40   15.80
   2 -10  14    2.60    6.50
   2 -10  14    3.20    5.50
   3 -10  14   16.30    5.20
   3 -10  14   22.10    6.10
  -4  10 -14   -4.50    9.90
   4 -10  14    3.40    5.20
  -5  -9  14    5.20    5.20
  -5  -9  14   13.00    6.10
  -4  -9  14    7.40    6.30
  -4  -9  14  -17.70    7.40
  -3  -9  14    5.10    6.90
  -3  -9  14    3.50    9.40
  -2  -9  14   13.30    7.40
  -2  -9  14   10.40    9.90
  -1  -9  14   23.90    9.30
  -1  -9  14   19.40    7.60
  -1  -9  14   23.80   11.30
   0  -9  14   83.39   12.10
   0  -9  14   57.19   13.30
  -1   9 -14   26.60    8.60
   1  -9  14   34.40   10.40
   2  -9  14    8.40    8.70
   2  -9  14   13.40    6.80
   3  -9  14   -5.40    5.90
   3  -9  14    3.10    6.90
   4  -9  14  -12.10    6.10
  -5   9 -14   -6.20    8.40
   5  -9  14   10.40    5.90
  -5  -8  14   13.80    7.00
  -5  -8  14    1.80    7.60
  -4  -8  14  101.89   17.00
  -3  -8  14    6.30    9.90
  -2  -8  14   -2.90    7.90
  -2  -8  14   -1.10    9.60
  -1  -8  14   92.69   13.30
  -1  -8  14   91.09   12.90
   0  -8  14  145.09   21.00
   0  -8  14  156.18   16.00
  -1   8 -14  108.19   14.00
   1  -8  14  109.69   12.10
   1  -8  14  121.69   15.40
  -2   8 -14    4.00    8.20
   2  -8  14    6.70    7.00
   2  -8  14   -0.50    8.80
  -3   8 -14   15.00    7.90
   3  -8  14   -2.10    7.60
   3  -8  14    5.20    8.40
   4  -8  14   91.39   10.60
  -5   8 -14    0.50   10.80
   5  -8  14    9.30    6.90
  -6  -7  14   47.10    7.20
  -6  -7  14   59.19    8.30
  -5  -7  14    6.50    8.90
  -4  -7  14   69.39   11.70
  -3  -7  14   13.60   10.00
  -2  -7  14  118.69   12.80
  -1  -7  14   97.99   13.40
   0  -7  14    9.00    8.50
   0  -7  14   16.10    9.40
  -1   7 -14  113.49   12.50
   1  -7  14  105.99   15.20
  -2   7 -14  136.19   14.30
   2  -7  14  100.79   15.90
   2  -7  14  122.59   14.20
  -3   7 -14   16.50    8.50
   3  -7  14   14.60   11.90
   3  -7  14   23.80    8.30
  -4   7 -14  103.29   13.60
   4  -7  14   90.39   14.20
  -5   7 -14   13.00   11.90
   5  -7  14    5.40    6.80
  -6   7 -14   54.99   14.00
   6  -7  14   66.29    9.80
  -7  -6  14   12.70    6.30
  -6  -6  14   52.69    9.80
  -6  -6  14   45.90    8.90
  -6  -6  14   29.10    7.80
  -5  -6  14   54.19    9.90
  -5  -6  14   72.99   12.20
  -4  -6  14   -7.00    9.20
  -1  -6  14   36.50    9.00
   0   6 -14    3.90    6.20
   0  -6  14  -10.00    7.40
  -1   6 -14   31.90    7.70
   1  -6  14   42.00    9.40
  -2   6 -14   -2.90    7.20
   2  -6  14    2.20    8.80
  -3   6 -14  156.18   14.10
   3  -6  14  152.38   13.90
  -4   6 -14    2.80    7.50
   4  -6  14   -7.30    7.40
  -5   6 -14   64.29   18.90
  -5   6 -14   79.29   12.80
   5  -6  14   82.49   12.40
  -6   6 -14   41.60   16.70
  -7   6 -14   11.20    8.40
   7  -6  14   20.40    5.70
  -7  -5  14   28.00    7.40
  -7  -5  14   23.10    6.90
  -6  -5  14   16.60    8.00
  -6  -5  14   19.60    8.40
  -6  -5  14   12.80   10.10
  -5  -5  14   55.49   10.90
  -5  -5  14   73.99   11.80
  -5  -5  14   71.59   11.10
  -4  -5  14   28.10    8.70
  -2  -5  14  200.58   14.90
  -1  -5  14    6.40    7.30
   0   5 -14    4.40    5.50
   0  -5  14    8.40    7.40
  -1   5 -14    1.90    5.90
   1  -5  14    9.20    7.20
  -2   5 -14  275.37   15.30
   2  -5  14  241.48   16.70
  -3   5 -14   -2.80    6.90
   3  -5  14   -1.40    8.10
  -4   5 -14   12.10    7.60
   4  -5  14   16.70    8.00
  -5   5 -14   42.40   17.10
   5  -5  14   66.29    9.30
  -6   5 -14   20.20   17.60
  -7   5 -14   29.30   13.50
  -7  -4  14   14.50    7.50
  -7  -4  14    0.90    8.70
  -7  -4  14    8.90    6.90
  -6  -4  14    4.10    8.70
  -6  -4  14   10.90    9.30
  -6  -4  14    4.80    7.70
  -5  -4  14   17.50    9.20
  -5  -4  14   30.30    9.30
  -5  -4  14   24.50    9.30
  -4  -4  14   47.00    9.00
  -2  -4  14    1.60    6.60
  -1  -4  14  139.99   12.50
   0   4 -14  619.24   23.40
   0  -4  14  635.04   25.20
  -1   4 -14  131.79   10.60
   1  -4  14  134.29   11.70
  -2   4 -14  -17.20    5.60
   2  -4  14    5.60    6.60
  -3   4 -14   16.50    6.60
   3  -4  14   25.70    8.00
  -4   4 -14   65.09    9.30
   4  -4  14   69.39    9.90
  -5   4 -14   17.90   15.50
  -6   4 -14   26.00   17.30
  -7   4 -14    3.70   14.10
  -8  -3  14   23.00    6.50
  -7  -3  14   -2.60    7.80
  -7  -3  14    6.60    8.50
  -7  -3  14   -0.30    5.80
  -6  -3  14   14.50    9.30
  -6  -3  14   20.20    9.10
  -6  -3  14    7.00    8.90
  -5  -3  14   45.10   10.40
  -5  -3  14   43.20   10.30
  -5  -3  14   54.49   10.90
  -4  -3  14   60.29    9.60
  -3  -3  14    4.50    6.30
  -2  -3  14   20.70    6.10
  -1  -3  14    6.60    6.20
   0   3 -14  206.78   11.00
   0  -3  14  205.68   13.10
  -1   3 -14   11.20    4.90
   1  -3  14    3.80    6.00
  -2   3 -14   20.50    6.10
   2  -3  14    6.90    6.00
  -3   3 -14    2.00    5.80
   3  -3  14   12.40    6.30
  -4   3 -14   58.29    8.50
   4  -3  14   65.39   10.60
  -6   3 -14   17.30   15.40
  -7   3 -14    3.00   16.50
  -8   3 -14   21.40    9.80
   8  -3  14   25.10    5.60
  -8  -2  14   17.00    6.90
  -7  -2  14   67.39   10.90
  -7  -2  14   42.70    9.80
  -7  -2  14   53.99   10.40
   6   2 -14   37.10    7.80
  -6  -2  14   56.19   10.70
  -6  -2  14   40.30   11.50
  -6  -2  14   34.80   10.30
   5   2 -14   71.69    9.10
  -5  -2  14   89.29   11.40
  -5  -2  14   90.79   11.90
  -4  -2  14    9.70    8.80
  -3  -2  14    7.70    6.20
  -2  -2  14  202.98   12.40
  -1  -2  14  135.79   10.40
   0  -2  14  167.38   11.10
  -1   2 -14  130.59    9.50
   1  -2  14  126.89   10.10
  -2   2 -14  239.28   12.60
   2  -2  14  230.78   12.50
  -3   2 -14   14.30    5.90
   3  -2  14   20.90    5.70
  -6   2 -14    8.50   15.20
  -7   2 -14   57.69   18.10
  -8   2 -14   17.20    9.80
   8  -2  14   13.50    5.50
   8   1 -14   12.30    4.60
  -8  -1  14   -2.60    6.30
  -8  -1  14    0.70    6.30
   7   1 -14    5.30    6.50
  -7  -1  14   12.30    8.80
  -7  -1  14   20.10   10.40
  -7  -1  14    4.60    8.50
   6   1 -14   46.90    8.50
  -6  -1  14   75.39   11.70
  -6  -1  14   61.69   11.80
  -6  -1  14   68.59   12.20
   5   1 -14  163.08   14.60
   5   1 -14  156.98   14.20
   5   1 -14  165.88   25.40
  -5  -1  14  180.98   15.80
   4   1 -14  462.05   23.40
  -3  -1  14  138.99   11.70
  -2  -1  14  156.88   11.30
  -1  -1  14   19.70    5.50
   0  -1  14  117.19    9.70
  -1   1 -14   29.70    5.80
   1  -1  14   19.20    4.70
  -2   1 -14  156.88   10.60
   2  -1  14  186.98    9.10
  -3   1 -14  153.38   10.40
  -6   1 -14   26.40   16.10
  -7   1 -14   13.30   16.40
  -8   1 -14  -11.20    8.50
   8  -1  14    0.90    5.10
   8   0 -14    4.30    4.90
  -8   0  14    6.40    6.70
  -8   0  14    0.30    6.80
   7   0 -14   44.50    7.90
  -7   0  14   63.19   12.20
  -7   0  14   55.19   10.40
  -7   0  14   47.10   10.30
   6   0 -14   56.69    8.70
  -6   0  14   55.39   11.50
  -6   0  14   64.79   11.90
   5   0 -14   41.90   10.60
   5   0 -14   35.00    9.60
   5   0 -14   31.70    7.70
  -5   0  14   42.90    9.60
   4   0 -14   76.59   11.00
   4   0 -14   74.39   10.60
   3   0 -14  121.79   10.30
   3   0 -14  130.49   12.90
  -2   0  14  216.38   12.80
   1   0 -14    5.40    4.50
  -1   0  14   -3.70    4.90
   0   0 -14 1912.41   60.39
   0   0  14 1891.41   60.29
   1   0  14    0.40    2.90
  -2   0 -14  182.78    9.90
  -3   0 -14  108.09    8.70
  -6   0 -14   34.80   16.70
   8  -1 -14    0.20    5.10
  -8   1  14    0.90    6.90
  -8   1  14    0.80    6.30
   7  -1 -14   27.10    7.40
  -7   1  14   14.50    8.40
  -7   1  14   25.80    9.20
  -7   1  14    7.70   10.70
   6  -1 -14   43.80    8.10
  -6   1  14   68.99   11.60
  -6   1  14   47.20   11.10
   5  -1 -14  150.18   17.30
   5  -1 -14  148.59   11.60
   5  -1 -14  164.28   13.20
  -5   1  14  151.28   13.80
   4  -1 -14  400.16   21.40
   4  -1 -14  407.36   18.40
   3  -1 -14  171.08   13.40
   3  -1 -14  163.68   11.60
   2  -1 -14  160.18   11.70
   2  -1 -14  160.68   10.60
   1  -1 -14   20.50    5.00
   0  -1 -14  112.79    8.50
  -1  -1 -14   22.90    5.30
  -2  -1 -14  144.99    8.90
   8  -2 -14    4.40    5.20
  -8   2  14   -0.30    6.80
  -8   2  14    7.40    6.50
   7  -2 -14   60.19    8.50
  -7   2  14   41.00    9.40
  -7   2  14   60.39   12.60
   6  -2 -14   41.40    8.10
  -6   2  14   54.49   12.30
  -6   2  14   34.30   10.10
   5  -2 -14   77.19   10.80
  -5   2  14   82.89   12.60
   4  -2 -14   13.70    7.60
   4  -2 -14   -5.60    5.50
  -4   2  14    2.20    6.70
   3  -2 -14   23.60    6.00
   3  -2 -14   20.90    7.10
   2  -2 -14  209.18   12.70
   2  -2 -14  206.38   12.00
   2  -2 -14  216.48   11.60
   1  -2 -14  116.49    9.10
   1  -2 -14  127.99    9.60
   0  -2 -14  159.68    9.50
   0  -2 -14  150.08    9.50
  -1  -2 -14   93.29    7.80
  -1  -2 -14  115.19    8.50
  -2  -2 -14  199.98   10.70
   8  -3 -14   21.60    5.50
  -8   3  14   24.90    7.00
  -8   3  14   27.00    6.40
   7  -3 -14   -0.30    6.50
  -7   3  14   -1.00    7.40
  -7   3  14    2.40   11.00
   6  -3 -14   15.10    7.30
  -6   3  14   14.40    9.50
  -6   3  14   20.70   11.60
   5  -3 -14   66.49    8.30
   5  -3 -14   59.29    7.80
  -5   3  14   62.19   10.30
   4  -3 -14   61.69    8.00
   4  -3 -14   67.49   10.00
  -4   3  14   61.39    9.40
   3  -3 -14   15.70    6.60
   3  -3 -14   -2.40    5.60
   2  -3 -14   15.10    5.80
   2  -3 -14   14.10    5.90
   1  -3 -14   -0.70    5.20
   1  -3 -14   11.40    5.00
   0  -3 -14  209.58   11.60
   0  -3 -14  197.08   11.50
  -1  -3 -14    2.20    4.70
  -1  -3 -14    1.80    4.60
  -2  -3 -14   15.10    5.20
   7  -4 -14    7.40    6.20
  -7   4  14   12.70   11.60
   6  -4 -14   13.10    9.50
   6  -4 -14    2.70    7.00
  -6   4  14   16.20   11.90
  -6   4  14   -1.90    8.20
   5  -4 -14   18.00    6.50
   5  -4 -14   29.90    7.10
  -5   4  14   17.30    8.90
  -5   4  14   32.20   13.00
   4  -4 -14   53.89    8.60
  -4   4  14   61.59    9.30
   3  -4 -14   15.30    6.20
   2  -4 -14    2.50    5.80
   1  -4 -14  132.99   10.70
   1  -4 -14  109.89   11.30
   0  -4 -14  656.93   24.30
   0  -4 -14  619.74   24.10
  -1  -4 -14  118.19   10.40
  -1  -4 -14  134.39   11.50
  -2  -4 -14    8.40    5.40
  -4  -4 -14   50.89   10.90
   7  -5 -14   38.90    6.70
  -7   5  14   44.30   13.10
   6  -5 -14   16.80    6.30
   6  -5 -14   11.40    7.10
  -6   5  14    9.90   13.10
   5  -5 -14   69.39    8.50
  -5   5  14   80.79   10.80
  -5   5  14   87.79   16.10
   4  -5 -14   13.00    7.50
   4  -5 -14   16.90    8.30
   4  -5 -14   18.20    6.50
  -4   5  14    6.70    7.80
   3  -5 -14   12.00    6.80
  -3   5  14    3.10    7.30
   2  -5 -14  222.48   14.40
   1  -5 -14   16.90    7.40
   1  -5 -14    9.90    6.40
   0  -5 -14    6.60    6.20
   0  -5 -14   10.80    6.60
  -1  -5 -14    2.80    6.70
  -1  -5 -14   16.80    6.30
  -7   6  14    7.40   10.80
   6  -6 -14   44.00    7.00
  -6   6  14   51.19   16.30
   5  -6 -14   99.99   14.70
   5  -6 -14   97.69   13.00
  -5   6  14   85.99   11.30
  -5   6  14   86.79   17.40
   4  -6 -14    7.50    6.60
   4  -6 -14   12.50    8.80
  -4   6  14   10.30    8.30
   3  -6 -14  158.58   13.00
   3  -6 -14  179.68   16.90
   3  -6 -14  157.48   16.10
   3  -6 -14  143.99   14.40
  -3   6  14  165.58   15.10
   2  -6 -14    1.80    7.10
  -2   6  14   16.10    8.60
   1  -6 -14   26.70    8.00
   0  -6 -14    1.90    7.40
  -1  -6 -14   36.90    8.70
  -2  -6 -14   -4.50    7.70
  -3  -6 -14  148.39   18.50
   6  -7 -14   70.89   10.00
  -6   7  14   60.19   16.00
   5  -7 -14   19.10    7.60
   5  -7 -14    1.80    7.80
  -5   7  14    4.90   16.70
   4  -7 -14  119.29   14.40
   4  -7 -14   83.89   12.20
  -4   7  14   72.59   10.90
   3  -7 -14   25.50    7.30
   3  -7 -14    3.30    8.80
   3  -7 -14   22.30    9.70
   3  -7 -14   32.50   10.60
  -3   7  14   12.80    9.10
   2  -7 -14  137.89   13.40
   2  -7 -14  110.09   12.50
   2  -7 -14  125.69   14.70
   2  -7 -14   97.99   15.00
   2  -7 -14  142.09   16.40
  -2   7  14  106.99   15.10
   1  -7 -14   95.79   11.30
   1  -7 -14  103.09   13.70
   1  -7 -14  114.79   15.40
   0  -7 -14   11.40    8.70
  -1  -7 -14  128.39   16.50
  -1  -7 -14   90.49   11.10
  -2  -7 -14   92.39   14.00
  -2  -7 -14  104.89   14.70
  -2  -7 -14  129.89   16.20
  -3  -7 -14    2.00   10.10
  -4  -7 -14   93.99   13.30
   6  -8 -14   29.40    5.90
  -6   8  14   30.20    8.60
   5  -8 -14    6.90    6.90
   5  -8 -14   17.60    6.90
  -5   8  14   22.40   19.20
   4  -8 -14   96.89   13.90
   4  -8 -14   83.49   13.10
   3  -8 -14    6.80   10.70
   3  -8 -14   -6.10    7.10
   3  -8 -14   17.60   10.60
  -3   8  14   11.90    9.00
   2  -8 -14   -5.60    9.70
   2  -8 -14   11.60    8.30
   2  -8 -14    2.90   10.10
  -2   8  14   -4.10    9.10
   1  -8 -14  155.18   18.90
   1  -8 -14  145.29   16.60
   1  -8 -14  158.48   16.40
   1  -8 -14  137.89   19.70
   0  -8 -14  184.78   22.00
   0  -8 -14  199.78   17.90
   0  -8 -14  191.38   18.40
  -1  -8 -14  116.69   13.90
  -1  -8 -14  125.99   19.10
  -1  -8 -14   95.89   11.90
  -2  -8 -14   -2.50   10.70
  -2  -8 -14    0.20    8.20
  -3  -8 -14   -1.20    8.30
  -3  -8 -14   -3.20   10.50
  -4  -8 -14   69.69   12.50
  -5  -8 -14    0.70    8.50
   5  -9 -14    6.80    5.90
   5  -9 -14    9.60    5.60
   4  -9 -14   -8.80    6.60
   4  -9 -14   -2.60    5.80
   3  -9 -14    8.30   11.30
   3  -9 -14    2.80   10.10
   3  -9 -14    8.90    7.60
   2  -9 -14   21.20   11.80
   2  -9 -14   24.40    9.20
   2  -9 -14    1.90    9.90
  -2   9  14    9.20    9.60
   1  -9 -14   20.30    9.80
   1  -9 -14   23.70   12.40
   1  -9 -14   24.80   10.10
  -1   9  14   18.60   10.60
   0  -9 -14   71.99   11.60
   0  -9 -14   61.69   14.50
  -1  -9 -14   29.70   10.30
  -1  -9 -14   27.20   12.40
  -2  -9 -14   19.80   10.10
  -2  -9 -14   20.40   10.90
  -3  -9 -14    6.10    8.70
  -3  -9 -14  -13.10    9.40
  -4  -9 -14   -4.40    9.10
  -5  -9 -14   10.90    7.80
   4 -10 -14    3.20    4.70
   4 -10 -14    6.10    5.00
   3 -10 -14   43.80    8.70
   2 -10 -14   10.10    9.30
   2 -10 -14   10.20   11.00
   2 -10 -14    8.10    8.80
   1 -10 -14   38.40   10.10
   1 -10 -14   25.20    9.00
   1 -10 -14   31.50   11.50
  -1  10  14   32.10    9.90
   0 -10 -14    4.90   11.00
   0 -10 -14    4.10    8.80
   0  10  14   -5.20    8.70
  -1 -10 -14   25.50   10.00
  -1 -10 -14   40.70   12.00
  -2 -10 -14    9.30    8.40
  -2 -10 -14    7.40   10.50
  -3 -10 -14   43.60   10.30
  -3 -10 -14   48.40    9.30
  -4 -10 -14   21.40    7.90
   2 -11 -14    3.30    6.40
   2 -11 -14    9.60    7.50
   1 -11 -14   22.90    9.50
   1 -11 -14   23.90    7.00
   1 -11 -14   19.30    7.40
   0 -11 -14    2.10    8.10
   0 -11 -14   -2.60    6.50
  -1 -11 -14   20.90    9.10
  -1 -11 -14   21.00    6.70
  -2 -11 -14    3.50    5.80
  -2 -11 -14    0.00    8.10
  -2 -11  15   94.39   10.70
  -2 -11  15   69.19    8.30
  -1 -11  15   35.20    7.50
   0 -11  15   -0.80    8.50
   0 -11  15    0.90    6.90
   1 -11  15   28.80    9.60
   1 -11  15   34.40    7.50
   2 -11  15   72.39    7.40
  -4 -10  15    9.30    6.40
  -4 -10  15   19.40    5.00
  -3 -10  15   -5.10    6.10
  -3 -10  15   16.80    8.90
  -2 -10  15   24.40   11.00
  -2 -10  15   20.00    7.40
  -1 -10  15   -1.90    7.60
  -1 -10  15   19.80   12.40
   0 -10  15    6.80    8.40
   0 -10  15   13.60   13.00
   1 -10  15    9.50    8.40
   1 -10  15   17.90   15.10
   2 -10  15   30.70    6.10
   2 -10  15   20.10    6.70
   3 -10  15    3.50    4.50
   3 -10  15    2.80    5.30
  -4  10 -15   12.00   10.00
   4 -10  15   21.40    5.40
  -5  -9  15   18.40    6.50
  -5  -9  15   20.10    5.40
  -4  -9  15   23.80    6.80
  -4  -9  15    7.80    8.10
  -3  -9  15   14.70    9.70
  -3  -9  15   21.50    7.60
  -2  -9  15   54.49   11.60
  -2  -9  15   42.50    8.10
  -1  -9  15   37.60   11.40
  -1  -9  15   16.00    9.20
   0  -9  15   92.99   14.20
   0  -9  15   91.09   12.60
  -1   9 -15   33.90    8.80
   1  -9  15   39.50   10.90
   2  -9  15   43.20    7.70
   2  -9  15   40.00    9.30
   3  -9  15   11.40    6.20
   3  -9  15   30.80    7.60
   4  -9  15    9.00    6.40
  -5   9 -15   22.30    8.60
   5  -9  15   17.50    5.70
  -5  -8  15   -2.10    6.60
  -5  -8  15   -5.20    7.50
  -4  -8  15   65.19   11.40
  -3  -8  15   32.20   10.80
  -2  -8  15   13.70   10.30
  -2  -8  15   19.80    8.60
  -1  -8  15   25.40   10.70
  -1  -8  15   24.30    8.90
   0  -8  15   94.09   14.70
   0  -8  15   72.39   13.30
  -1   8 -15   43.20    9.10
   1  -8  15   36.80   10.50
   1  -8  15   22.70    7.40
  -2   8 -15    8.90    7.90
   2  -8  15    6.10    9.20
   2  -8  15    7.50    7.20
  -3   8 -15   39.00    8.70
   3  -8  15   42.70    9.10
   3  -8  15   30.90    8.60
   4  -8  15  113.29   13.30
  -5   8 -15   -2.20   10.40
   5  -8  15   -5.80    6.30
  -6  -7  15    5.00    6.70
  -6  -7  15    4.30    6.20
  -5  -7  15    9.30    9.00
  -4  -7  15   58.19   11.30
  -3  -7  15   12.50   10.20
  -2  -7  15   54.19   10.50
  -2  -7  15   66.59   11.80
  -1  -7  15   65.99   11.00
   0  -7  15   50.69    9.90
  -1   7 -15   87.29   12.10
   1  -7  15   79.59   12.10
  -2   7 -15   78.09   10.50
   2  -7  15   65.29   11.60
  -3   7 -15   13.30    8.20
   3  -7  15   13.00    7.90
  -4   7 -15   64.79   10.00
   4  -7  15   96.19   14.50
  -5   7 -15   15.90   12.00
   5  -7  15    3.00    6.90
   6  -7  15    3.30    6.00
  -6  -6  15   22.00    7.30
  -6  -6  15   49.40    9.80
  -6  -6  15   36.40    8.60
  -5  -6  15   70.29   12.20
  -5  -6  15   43.70    9.40
  -4  -6  15    0.20    9.70
  -1  -6  15  140.39   14.50
   0   6 -15   65.49    8.30
   0  -6  15   54.69   10.20
  -1   6 -15  165.88   13.70
   1  -6  15  145.59   15.00
  -2   6 -15   14.60    7.50
   2  -6  15    9.40    8.80
  -3   6 -15  195.98   15.80
  -4   6 -15    5.30    7.50
   4  -6  15    0.80    7.80
  -5   6 -15   62.09   13.20
  -5   6 -15   65.79   19.40
   5  -6  15   90.49   10.20
  -6   6 -15   40.50   16.70
  -7   6 -15    0.80    7.80
  -7  -5  15   28.00    7.40
  -7  -5  15   23.40    7.40
  -7  -5  15   32.40    7.30
  -6  -5  15    6.20    7.60
  -6  -5  15   12.70   10.30
  -6  -5  15   18.20    8.10
  -5  -5  15   47.70   10.70
  -5  -5  15   56.09   11.20
  -4  -5  15  223.68   20.50
  -2  -5  15   68.19    9.40
  -1  -5  15  114.39   12.90
   0   5 -15   26.00    6.20
   0  -5  15   33.70    8.50
  -1   5 -15  105.29   10.70
   1  -5  15  108.89   12.60
  -2   5 -15   92.79   11.40
   2  -5  15   92.19   13.70
  -3   5 -15   21.00    8.00
   3  -5  15   26.70    9.10
  -4   5 -15  316.77   18.50
   4  -5  15  307.47   18.40
  -5   5 -15   53.49   17.70
   5  -5  15   43.80    8.70
  -6   5 -15  -11.50   16.60
  -7   5 -15   27.90   13.10
  -7  -4  15   -4.00    6.70
  -7  -4  15   -3.40    6.30
  -7  -4  15   -9.40    8.40
  -6  -4  15   13.40    9.20
  -6  -4  15    0.60    6.70
  -6  -4  15   20.10    9.50
  -5  -4  15    4.10    8.30
  -5  -4  15    4.40    8.80
  -5  -4  15  -11.50    7.90
  -4  -4  15   93.19   13.30
  -2  -4  15   61.09    8.50
  -1  -4  15  375.56   18.50
   0   4 -15   32.40    5.70
   0  -4  15   22.40    7.70
   1  -4  15  375.96   18.00
  -2   4 -15   56.89    8.00
   2  -4  15   36.10    8.30
  -3   4 -15   69.19    8.70
   3  -4  15   74.59    9.40
  -4   4 -15  103.39   13.00
   4  -4  15   87.79   10.30
  -5   4 -15   28.10   16.10
  -6   4 -15   10.70   16.50
  -7   4 -15   -2.60   14.30
  -8  -3  15   31.60    7.90
  -7  -3  15   68.19   10.50
  -7  -3  15   50.49    9.80
  -6  -3  15   14.60    9.00
  -6  -3  15   27.40    9.60
  -6  -3  15   25.60    9.90
  -5  -3  15   59.19   11.00
  -5  -3  15   42.90   10.20
  -5  -3  15   59.39   10.60
  -4  -3  15   55.09    9.30
  -3  -3  15   11.40    6.40
  -2  -3  15   24.20    6.70
  -1  -3  15 1518.05   51.49
   0   3 -15 1124.99   38.80
   0  -3  15 1177.28   39.90
  -1   3 -15 1471.55   49.10
   1  -3  15 1491.75   49.70
  -2   3 -15   12.20    5.80
   2  -3  15   12.70    6.40
  -3   3 -15   16.60    6.60
   3  -3  15    3.20    6.00
  -4   3 -15   65.49    8.90
  -5   3 -15   60.59   17.00
  -6   3 -15   11.20   15.80
  -7   3 -15   41.00   17.40
  -8   3 -15   14.90    9.70
   8  -3  15   23.70    6.00
  -8  -2  15   11.10    6.20
  -7  -2  15   62.09   10.20
  -7  -2  15   50.59    9.30
  -7  -2  15   57.49   11.00
   6   2 -15   30.30    7.70
  -6  -2  15   28.60   10.30
  -6  -2  15   32.50    9.90
  -6  -2  15   25.00   11.10
   5   2 -15   25.90    7.20
  -5  -2  15    3.10    8.70
  -5  -2  15    8.00    8.80
  -4  -2  15   52.49    9.30
  -3  -2  15  196.68   13.60
  -2  -2  15   68.59    9.50
  -1  -2  15  383.56   17.20
   0   2 -15  311.97   14.30
   0  -2  15  332.87   15.20
  -1   2 -15  393.36   16.50
   1  -2  15  377.86   16.50
  -2   2 -15   70.89    9.20
   2  -2  15   81.09    8.80
  -3   2 -15  194.08   13.00
   3  -2  15  210.98   12.10
  -6   2 -15   21.60   15.50
  -7   2 -15   97.09   18.90
  -8   2 -15   24.80    9.90
   8  -2  15    2.40    5.00
   8   1 -15   -4.50    4.10
  -8  -1  15   -0.60    6.20
  -8  -1  15   -3.00    5.80
   7   1 -15    0.50    6.20
  -7  -1  15   -7.00    7.90
  -7  -1  15   11.90    8.20
  -7  -1  15   13.40   10.50
   6   1 -15   12.10    7.40
  -6  -1  15   20.50    9.60
  -6  -1  15   13.20   10.20
  -6  -1  15   11.20   10.10
   5   1 -15   37.80    8.40
   5   1 -15   32.40    7.60
  -5  -1  15   12.10    8.90
   4   1 -15   13.40    8.30
  -3  -1  15  121.99   11.70
  -2  -1  15  236.28   13.50
  -1  -1  15  444.56   17.70
   0  -1  15  111.49    9.40
  -1   1 -15  490.25   18.70
   1  -1  15  499.35   18.50
  -2   1 -15  199.98   11.80
   2  -1  15  234.28   10.50
  -3   1 -15  124.49    9.70
  -6   1 -15   13.60   15.50
  -7   1 -15    7.40   16.50
  -8   1 -15   15.00    9.40
   8  -1  15    5.70    5.00
   8   0 -15    1.90    4.90
  -8   0  15   -5.30    5.90
  -8   0  15    5.40    6.90
   7   0 -15   41.70    7.70
  -7   0  15   19.60    9.30
  -7   0  15   29.70   11.30
  -7   0  15   36.00    9.80
   6   0 -15   53.59    8.80
  -6   0  15   59.49   11.80
  -6   0  15   64.49   12.10
   5   0 -15   89.29   10.60
   5   0 -15  103.79   12.80
  -5   0  15  101.59   14.90
   4   0 -15  103.79   11.80
   4   0 -15   71.69   11.00
   3   0 -15  466.15   19.60
   3   0 -15  467.45   21.70
  -2   0  15   -5.30    5.50
   1   0 -15   -2.40    4.30
  -1   0  15    1.40    5.00
   0   0 -15   -4.60    4.00
   0   0  15   -3.80    4.30
  -1   0 -15    0.40    4.00
   1   0  15   -0.90    3.00
  -2   0 -15   -4.80    4.40
  -3   0 -15  418.36   17.00
  -6   0 -15   47.20   17.50
   8  -1 -15    5.30    5.10
  -8   1  15    1.50    6.60
  -8   1  15   -7.40    5.80
   7  -1 -15   -0.40    6.60
  -7   1  15    1.70    8.20
  -7   1  15    6.90    7.60
  -7   1  15    9.00   11.10
   6  -1 -15   29.50    7.80
  -6   1  15   21.10    9.80
  -6   1  15   24.40   10.50
   5  -1 -15   24.60    6.60
   5  -1 -15   22.80    7.10
  -5   1  15   30.50    8.50
   4  -1 -15    0.60    5.50
   4  -1 -15   10.40    7.70
  -4   1  15   -7.60    6.60
   3  -1 -15  151.98   11.40
   3  -1 -15  135.39   13.10
   2  -1 -15  226.78   12.10
   2  -1 -15  204.58   11.00
   2  -1 -15  212.38   13.00
   1  -1 -15  502.55   23.00
   1  -1 -15  502.55   19.10
   0  -1 -15   87.79    8.20
   0  -1 -15   95.39    8.30
  -1  -1 -15  441.06   17.10
  -2  -1 -15  195.48   10.70
   8  -2 -15   18.20    5.50
  -8   2  15   16.10    6.60
  -8   2  15   13.30    6.90
   7  -2 -15   73.39   10.70
  -7   2  15   86.89   13.50
  -7   2  15   68.59   10.60
   6  -2 -15   26.20    7.40
  -6   2  15   -1.00   10.60
  -6   2  15   17.20    9.90
   5  -2 -15    1.40    5.80
   5  -2 -15   14.40    6.80
  -5   2  15    7.10    8.00
   4  -2 -15   77.99   10.40
   4  -2 -15   72.09   10.50
  -4   2  15   61.99    9.00
   3  -2 -15  192.08   12.20
   3  -2 -15  186.18   14.00
   2  -2 -15   81.29    9.30
   2  -2 -15   77.99    8.70
   1  -2 -15  359.66   15.60
   1  -2 -15  357.86   15.30
   0  -2 -15  273.87   12.70
   0  -2 -15  259.27   12.30
  -1  -2 -15  343.67   14.60
  -2  -2 -15   63.79    7.50
   8  -3 -15   24.20    5.50
  -8   3  15   20.70    6.10
   7  -3 -15   72.39   10.30
  -7   3  15   57.19   13.00
  -7   3  15   56.69    9.40
   6  -3 -15   17.80    7.50
  -6   3  15   21.80    9.30
  -6   3  15    9.10   11.50
   5  -3 -15   74.19   11.00
   5  -3 -15   71.59   10.50
  -5   3  15   50.79   13.30
  -5   3  15   79.39   11.10
   4  -3 -15   70.79   10.30
   4  -3 -15   65.99    8.30
  -4   3  15   61.49    9.40
   3  -3 -15    2.80    6.00
   2  -3 -15   16.40    5.70
   2  -3 -15   12.10    5.80
   1  -3 -15 1444.06   48.10
   1  -3 -15 1453.15   48.30
   0  -3 -15 1129.09   38.20
   0  -3 -15 1114.79   38.30
  -1  -3 -15 1320.47   43.40
  -1  -3 -15 1285.77   43.10
  -2  -3 -15   12.50    5.20
   7  -4 -15    3.70    5.90
  -7   4  15   -0.30   11.40
   6  -4 -15    0.90    5.90
   6  -4 -15   13.30    7.50
  -6   4  15    8.50   12.10
  -6   4  15   12.00    8.50
   5  -4 -15   -2.60    6.10
   5  -4 -15   12.10    6.20
  -5   4  15    0.40   11.90
  -5   4  15   -1.70    7.60
   4  -4 -15   97.89   13.00
   4  -4 -15   98.19   12.90
  -4   4  15  122.79   13.90
   3  -4 -15   77.99   11.10
  -3   4  15   60.69    9.50
   2  -4 -15   51.99    8.10
   2  -4 -15   52.29    7.60
   1  -4 -15  361.16   17.10
   1  -4 -15  373.06   16.90
   0  -4 -15   24.80    6.30
   0  -4 -15   23.00    6.20
  -1  -4 -15  297.17   15.80
  -1  -4 -15  330.27   15.10
  -2  -4 -15   35.20    6.40
   7  -5 -15   28.30    6.10
  -7   5  15   21.50   12.70
   6  -5 -15   23.80    6.50
  -6   5  15   36.00    9.10
  -6   5  15   16.50   14.00
   5  -5 -15   58.99    8.10
  -5   5  15   49.40    9.90
  -5   5  15   39.50   14.40
   4  -5 -15  294.17   18.00
   4  -5 -15  317.37   18.20
   4  -5 -15  286.97   16.30
  -4   5  15  279.47   18.30
   3  -5 -15   19.00    7.60
  -3   5  15   34.70    8.50
   2  -5 -15   71.49    9.10
  -2   5  15   91.19   12.20
   1  -5 -15  105.69   12.20
   1  -5 -15  111.49   11.50
   0  -5 -15   31.80    7.10
   0  -5 -15   29.70    7.40
  -1  -5 -15  125.89   12.80
  -1  -5 -15  105.89   10.50
  -7   6  15   11.60   10.80
   6  -6 -15   40.20    7.10
  -6   6  15   59.29   17.00
   5  -6 -15   74.09    9.50
   5  -6 -15   89.99   13.40
  -5   6  15   58.29   10.10
  -5   6  15   82.79   17.80
   4  -6 -15   18.50    9.20
   4  -6 -15   -9.70    7.10
   4  -6 -15    0.10    6.60
  -4   6  15  -10.60    7.70
   3  -6 -15  162.58   13.40
   3  -6 -15  161.58   15.50
   3  -6 -15  184.38   17.00
   3  -6 -15  149.59   14.00
  -3   6  15  129.79   14.70
   2  -6 -15    8.40    7.30
  -2   6  15    6.50    8.20
   1  -6 -15  145.69   14.80
   0  -6 -15   52.59    9.30
  -1  -6 -15  148.19   14.40
  -1  -6 -15  165.48   14.90
   6  -7 -15   -0.50    5.60
  -6   7  15  -25.90   15.30
   5  -7 -15   11.20    7.20
   5  -7 -15    5.20    7.60
  -5   7  15   17.30   17.20
   4  -7 -15   82.99   10.30
   4  -7 -15   80.49   12.00
  -4   7  15   78.99   10.80
   3  -7 -15   15.10    9.10
   3  -7 -15    9.20   10.20
   3  -7 -15   10.90    7.00
   3  -7 -15   -0.40    9.30
  -3   7  15   13.60    9.30
   2  -7 -15   52.79    8.30
   2  -7 -15   76.99   12.10
   2  -7 -15   51.19    9.70
   2  -7 -15   51.79   10.90
   2  -7 -15   69.49   11.30
  -2   7  15   67.09   10.90
   1  -7 -15   60.29   10.10
   1  -7 -15   88.19   13.80
   1  -7 -15   67.79   11.50
   1  -7 -15   81.89   10.50
   0  -7 -15   40.50    9.20
   0  -7 -15   36.00    9.40
  -1  -7 -15  106.79   14.80
  -1  -7 -15   94.99   12.20
  -1  -7 -15   92.39   14.20
  -2  -7 -15   54.29   10.90
  -2  -7 -15   52.39    9.40
  -2  -7 -15   89.49   13.90
  -3  -7 -15    3.60   10.70
  -4  -7 -15   71.19   12.60
   5  -8 -15    3.10    6.80
   5  -8 -15    7.10    6.50
   4  -8 -15  111.89   13.90
   4  -8 -15   88.69   12.60
   3  -8 -15   42.20    8.70
   3  -8 -15   54.49   12.70
   3  -8 -15   45.30   11.70
  -3   8  15   34.00    9.90
   2  -8 -15   27.30   11.20
   2  -8 -15   12.80    8.50
   2  -8 -15   21.90   10.30
  -2   8  15    5.80    9.40
   1  -8 -15   41.90   10.00
   1  -8 -15   47.90   10.80
   1  -8 -15   30.80   12.70
   1  -8 -15   44.30   10.50
  -1   8  15   31.30   11.10
   0  -8 -15  103.89   16.00
   0  -8 -15  135.19   14.70
   0  -8 -15  128.79   16.50
  -1  -8 -15   36.80   11.30
  -1  -8 -15   56.09   13.40
  -1  -8 -15   24.60    9.80
  -2  -8 -15   30.90   12.00
  -2  -8 -15    8.20    8.70
  -3  -8 -15   41.90   12.00
  -3  -8 -15   44.50   10.20
  -4  -8 -15   82.19   12.60
   5  -9 -15   31.50    6.20
   5  -9 -15   -1.30    7.40
   4  -9 -15   15.40    6.10
   4  -9 -15   20.80    7.10
   3  -9 -15   22.10    7.80
   3  -9 -15    2.40   10.80
   3  -9 -15   36.00   10.50
   2  -9 -15   63.29   10.60
   2  -9 -15   42.70   12.60
   2  -9 -15   77.09   12.30
  -2   9  15   32.70   10.20
   1  -9 -15   43.60   12.90
   1  -9 -15   17.30   10.30
   1  -9 -15   45.80   10.60
  -1   9  15   26.80   10.60
   0  -9 -15   95.39   12.30
   0  -9 -15   88.59   15.10
  -1  -9 -15   22.30   12.70
  -1  -9 -15   42.90   10.80
  -2  -9 -15   48.70   10.40
  -2  -9 -15   74.29   13.80
  -3  -9 -15   34.90   10.90
  -3  -9 -15   19.10    9.10
  -4  -9 -15   18.00    9.30
   4 -10 -15   22.60    6.70
   4 -10 -15    7.00    5.10
   3 -10 -15   -4.60    7.10
   2 -10 -15   28.40    8.80
   2 -10 -15   42.30   11.40
   2 -10 -15   21.30    9.40
   1 -10 -15   19.30    8.60
   1 -10 -15   10.20    9.00
   1 -10 -15   11.00   10.20
  -1  10  15   26.40    9.10
   0 -10 -15   27.10    9.50
   0 -10 -15   27.50   11.60
   0  10  15   21.90    9.50
  -1 -10 -15   23.40    9.30
  -1 -10 -15   24.90   11.30
  -2 -10 -15   32.20    9.30
  -2 -10 -15   38.20   11.30
  -3 -10 -15    4.00    9.10
  -3 -10 -15   -3.40    7.40
  -4 -10 -15   21.50    8.00
   2 -11 -15   74.89    9.30
   1 -11 -15   23.40    9.00
   1 -11 -15   34.40    7.50
   1 -11 -15   35.20    7.60
   0 -11 -15    5.10    6.30
   0 -11 -15    5.60    8.00
  -1 -11 -15   22.50    8.90
  -1 -11 -15   23.50    6.50
  -2 -11 -15   75.79   11.10
  -2 -11 -15   90.99   10.10
  -2 -11  16   11.30    8.60
  -1 -11  16    1.20    8.10
  -1 -11  16   -8.10    6.40
   0 -11  16    5.30    8.60
   0 -11  16   15.20    7.10
   1 -11  16   12.30    8.70
   1 -11  16   17.20    6.90
   2 -11  16   -5.30    4.30
  -4 -10  16   39.40    5.40
  -4 -10  16   53.59    7.20
  -3 -10  16   11.10    6.10
  -3 -10  16    6.00    8.70
  -2 -10  16    7.30    6.80
  -2 -10  16   18.70   11.20
  -1 -10  16    8.00   12.20
  -1 -10  16  -13.70    6.90
   0 -10  16    1.10   12.80
   0 -10  16   -5.60    7.90
   1 -10  16   -3.20    7.60
   1 -10  16   -0.70   18.20
   2 -10  16    4.30    5.80
   2 -10  16   13.30    5.60
   3 -10  16    1.00    4.30
   3 -10  16    3.80    5.20
  -4  10 -16   37.80    9.80
   4 -10  16   60.39    7.40
  -5  -9  16   10.30    4.70
  -5  -9  16    9.10    6.10
  -4  -9  16   42.70    7.00
  -4  -9  16   56.99    9.30
  -3  -9  16    7.00    7.00
  -3  -9  16    3.80    9.70
  -2  -9  16    8.10    7.10
  -2  -9  16   11.00   10.20
  -2  -9  16   11.40    8.50
  -1  -9  16   68.19   13.30
  -1  -9  16   85.59   11.70
   0  -9  16   -3.40    9.40
   0  -9  16   -4.90   11.90
   1  -9  16   64.39   12.00
   2  -9  16    2.70    6.80
   2  -9  16   12.50    6.70
   3  -9  16   12.10    7.20
   3  -9  16    2.60    5.70
   4  -9  16   80.49   10.50
   5  -9  16    9.00    5.30
  -5  -8  16    3.40    7.00
  -5  -8  16   14.80    7.70
  -4  -8  16   32.00   10.90
  -3  -8  16    7.70   10.30
  -2  -8  16   44.20   10.00
  -2  -8  16   29.40   11.00
  -1  -8  16  148.99   15.60
  -1  -8  16  169.88   20.80
   0  -8  16   51.09   10.70
  -1   8 -16  171.78   15.10
   1  -8  16  167.98   17.50
   1  -8  16  155.68   13.40
  -2   8 -16   18.10    8.10
   2  -8  16   17.30    9.80
   2  -8  16   20.40    7.50
  -3   8 -16   20.20    8.80
   3  -8  16    4.30    8.00
   3  -8  16    9.20    7.30
   4  -8  16   24.40    8.30
  -5   8 -16   12.30   10.00
   5  -8  16    2.70    6.20
  -6  -7  16   -6.50    5.90
  -6  -7  16   10.80    6.90
  -5  -7  16   27.20    9.80
  -4  -7  16   11.50   10.00
  -3  -7  16  155.68   21.30
  -2  -7  16  152.08   20.80
  -2  -7  16  137.19   15.10
  -1  -7  16  -21.60    7.50
   0  -7  16   53.59   10.10
  -1   7 -16   -1.40    7.30
   1  -7  16  -11.70    8.60
  -2   7 -16  146.99   14.00
   2  -7  16  146.59   17.10
  -3   7 -16  206.18   16.10
   3  -7  16  190.08   16.20
  -4   7 -16    2.70    8.00
   4  -7  16   -6.40    8.00
  -5   7 -16   33.50   12.00
   5  -7  16   26.30    7.60
   6  -7  16   11.80    6.00
  -6  -6  16   12.70    6.50
  -6  -6  16   21.50    9.00
  -5  -6  16    2.40   10.30
  -4  -6  16   12.30   10.30
  -3  -6  16  100.09   14.40
  -1  -6  16   47.10    9.70
   0   6 -16    0.80    6.00
   0  -6  16   -0.80    8.10
  -1   6 -16   57.39    8.70
   1  -6  16   56.99   10.40
  -2   6 -16   22.80    8.20
   2  -6  16   43.00   10.20
  -3   6 -16  103.19   12.90
  -4   6 -16   16.80    8.90
   4  -6  16   24.80    8.40
  -5   6 -16   18.40   18.50
   5  -6  16    8.70    7.90
  -6   6 -16   24.40   15.70
  -7   6 -16   31.00    8.20
  -7  -5  16    3.80    6.20
  -7  -5  16   -4.10    6.70
  -6  -5  16   -5.00    6.90
  -6  -5  16   -2.40   10.00
  -6  -5  16   -3.50    6.60
  -5  -5  16   -1.90    9.60
  -5  -5  16   22.70    9.60
  -4  -5  16   36.00   10.50
  -2  -5  16  178.68   14.20
  -1  -5  16   74.59    9.90
   0   5 -16   96.29   10.00
   0  -5  16   89.19   13.40
  -1   5 -16   54.19    8.00
   1  -5  16   89.99   12.20
  -2   5 -16  192.38   13.60
   2  -5  16  169.18   15.20
  -3   5 -16   11.20    7.40
   3  -5  16   24.80    9.00
  -4   5 -16   84.59   20.20
  -4   5 -16   82.19   10.70
   4  -5  16   59.09    9.40
  -5   5 -16   18.80   16.50
   5  -5  16   15.90    8.00
  -6   5 -16   -4.20   17.20
  -7   5 -16  205.18   17.00
  -7  -4  16   27.40    7.30
  -7  -4  16   46.40    9.80
  -7  -4  16   19.80    6.80
  -6  -4  16   14.90    9.40
  -6  -4  16   -2.70    8.40
  -6  -4  16    3.50    6.50
  -5  -4  16   99.79   12.20
  -5  -4  16   66.19   11.60
  -4  -4  16   36.10    8.50
  -2  -4  16  256.57   15.10
  -1  -4  16   63.19    8.90
   0   4 -16   14.90    5.50
   0  -4  16   18.60    7.10
  -1   4 -16   76.49    9.30
   1  -4  16   86.49   11.90
  -2   4 -16  353.56   17.00
   2  -4  16  335.07   18.00
  -3   4 -16   47.10    8.00
   3  -4  16   31.60    8.40
  -4   4 -16   57.29    9.10
  -5   4 -16   51.99   17.10
  -6   4 -16    7.60   16.20
  -7   4 -16   19.90   15.10
  -7  -3  16   74.59   10.30
  -7  -3  16   45.50    9.00
  -7  -3  16   54.59    8.70
  -6  -3  16   98.39   12.60
  -6  -3  16   89.99   13.70
  -6  -3  16  100.99   12.70
  -5  -3  16  100.49   12.50
  -5  -3  16  101.69   12.90
  -5  -3  16   87.29   12.40
  -4  -3  16   49.80    9.10
  -3  -3  16   41.20    7.80
  -2  -3  16   49.30    7.40
  -1  -3  16  107.09   11.70
   0   3 -16  453.05   18.60
   0  -3  16  472.25   20.00
  -1   3 -16  114.09   10.10
   1  -3  16   98.99   11.20
  -2   3 -16   49.50    7.40
   2  -3  16   61.39    7.70
  -3   3 -16   63.59    8.40
   3  -3  16   58.79    8.20
  -4   3 -16   90.89   11.40
  -5   3 -16   72.89   16.60
  -6   3 -16   86.09   18.00
  -7   3 -16   92.19   19.10
  -8  -2  16   37.60    6.80
  -7  -2  16   75.39   10.60
  -7  -2  16   52.99    8.50
  -7  -2  16   68.49   11.30
   6   2 -16   35.90    8.00
  -6  -2  16   39.40   10.20
  -6  -2  16   37.70   11.00
  -6  -2  16   43.60   11.60
   5   2 -16   63.39    8.90
  -5  -2  16   69.39   11.40
  -5  -2  16   60.39   16.50
  -5  -2  16   75.09   11.10
  -4  -2  16    7.00    7.40
  -3  -2  16   62.39    8.60
  -2  -2  16   84.79   10.40
   1   2 -16  309.87   13.50
  -1  -2  16  318.47   15.40
   0   2 -16   39.50    6.20
   0  -2  16   32.50    6.70
  -1   2 -16  347.97   15.90
   1  -2  16  367.26   16.10
  -2   2 -16  114.59   10.20
   2  -2  16   78.09    9.10
  -3   2 -16   74.39    9.90
  -4   2 -16    8.90    6.50
  -6   2 -16   33.40   16.80
  -7   2 -16   83.29   18.40
  -8   2 -16   18.50    9.70
   8  -2  16   33.70    5.50
   8   1 -16    3.70    5.20
  -8  -1  16   14.60    6.10
  -8  -1  16    1.80    6.00
   7   1 -16   38.10    7.30
  -7  -1  16   25.70    9.00
  -7  -1  16   34.30   11.10
  -7  -1  16   38.10    9.80
   6   1 -16   38.00    8.20
  -6  -1  16   48.60   11.90
  -6  -1  16   30.10   11.10
  -6  -1  16   46.00   10.40
   5   1 -16  144.09   14.90
   5   1 -16  112.49   12.40
  -5  -1  16  102.29   15.70
   4   1 -16   99.69   14.70
  -4  -1  16   85.49   10.70
  -3  -1  16   66.79    8.50
  -2  -1  16    9.30    6.10
  -1  -1  16  224.58   12.50
   0   1 -16   79.59    8.10
   0  -1  16   75.99    8.40
  -1   1 -16  230.38   11.60
   1  -1  16  216.28   11.20
  -2   1 -16   -3.40    5.10
   2  -1  16   -0.70    3.90
  -3   1 -16   69.49    8.80
  -6   1 -16   16.30   16.10
  -7   1 -16   30.10   16.50
  -8   1 -16   17.30    9.30
   8  -1  16    2.90    4.90
   8   0 -16    3.10    4.50
  -8   0  16   -0.60    6.10
  -8   0  16    7.60    6.60
   7   0 -16  111.69   11.40
  -7   0  16  159.38   20.80
  -7   0  16  128.89   15.90
  -7   0  16  110.69   13.10
   6   0 -16   18.00    7.80
  -6   0  16    6.70   10.10
  -6   0  16   22.50   10.60
   5   0 -16   18.00    7.00
   5   0 -16   17.70    7.30
  -5   0  16   29.40    9.70
   4   0 -16   16.40    6.80
   4   0 -16   12.90    8.60
  -4   0  16    3.40    7.20
   3   0 -16   50.29    8.80
   3   0 -16   50.99    7.30
   2   0 -16   52.09    6.50
   2   0 -16   50.59    7.80
  -2   0  16   57.39    7.60
   1   0 -16  116.69    8.70
  -1   0  16  125.09    9.60
   0   0 -16  721.73   25.60
   0   0 -16  752.82   25.90
   0   0  16  752.52   25.70
  -1   0 -16  116.59    8.80
   1   0  16  119.89    6.90
  -2   0 -16   47.00    5.90
  -3   0 -16   52.59    6.40
  -6   0 -16   43.70   16.90
   8  -1 -16   15.50    5.20
  -8   1  16   19.20    6.70
  -8   1  16    7.20    5.90
   7  -1 -16   41.10    7.60
  -7   1  16   17.80   11.60
  -7   1  16   34.10    9.40
  -7   1  16   32.10    8.90
   6  -1 -16   39.30    8.30
  -6   1  16   49.50   11.30
  -6   1  16   46.40   12.10
   5  -1 -16  121.79   11.70
   5  -1 -16  137.09   13.40
  -5   1  16  113.39   14.20
   4  -1 -16   84.89   11.20
   4  -1 -16   84.69   11.20
  -4   1  16   82.69   12.60
   3  -1 -16   69.09    9.80
   3  -1 -16   60.99    8.90
   2  -1 -16    4.20    4.90
   2  -1 -16    5.30    5.20
   1  -1 -16  220.28   11.50
   1  -1 -16  220.28   11.00
   0  -1 -16   68.49    8.00
   0  -1 -16   65.89    7.50
  -1  -1 -16  217.48   11.30
  -2  -1 -16    1.60    4.60
  -3  -1 -16   58.69    8.00
   8  -2 -16   43.60    6.00
  -8   2  16   43.50    7.10
  -8   2  16   39.00    7.50
   7  -2 -16   81.29   10.80
  -7   2  16  100.79   14.00
  -7   2  16   90.99   13.50
   6  -2 -16   59.79    9.00
  -6   2  16   42.50   10.70
  -6   2  16   28.00   11.90
   5  -2 -16   88.09    9.90
   5  -2 -16   94.89   10.60
  -5   2  16   82.79   11.10
   4  -2 -16    9.10    6.30
   4  -2 -16   12.30    7.90
  -4   2  16    9.80    7.00
   3  -2 -16   76.49   11.40
   3  -2 -16   63.09    7.50
   2  -2 -16  110.49    9.30
   2  -2 -16   94.09    9.70
   1  -2 -16  305.67   14.10
   1  -2 -16  319.37   14.40
   0  -2 -16   32.60    5.40
   0  -2 -16   25.60    5.40
  -1  -2 -16  291.17   13.30
  -2  -2 -16   99.79    8.40
   7  -3 -16   91.69   10.40
  -7   3  16   57.59    9.30
  -7   3  16   81.09   14.10
   6  -3 -16  100.79   12.10
  -6   3  16  108.99   15.30
  -6   3  16  102.29   15.10
   5  -3 -16   95.29   11.80
   5  -3 -16   99.69   11.00
  -5   3  16  101.99   13.60
  -5   3  16  106.99   15.70
   4  -3 -16   60.99    8.10
  -4   3  16   48.30    9.20
   3  -3 -16   41.20    7.00
   2  -3 -16   56.39    7.20
   2  -3 -16   66.09    9.40
   1  -3 -16  104.79    9.70
   1  -3 -16  110.89   10.30
   0  -3 -16  414.76   17.90
   0  -3 -16  447.36   18.20
  -1  -3 -16   96.89    8.80
  -1  -3 -16   78.59    8.10
  -2  -3 -16   52.19    6.30
   7  -4 -16   37.70    7.00
  -7   4  16   38.10   12.90
  -7   4  16   33.60    7.60
   6  -4 -16    8.60    6.10
   6  -4 -16   13.70    7.50
  -6   4  16   31.80   13.40
  -6   4  16   -5.10    7.80
   5  -4 -16   75.19   11.80
   5  -4 -16  103.59   11.20
  -5   4  16   75.79   10.90
  -5   4  16   78.19   15.30
   4  -4 -16   38.30    8.20
   4  -4 -16   47.90    8.90
   4  -4 -16   45.00    7.20
  -4   4  16   61.59    9.50
   3  -4 -16   34.50    7.30
  -3   4  16   30.10    8.50
   2  -4 -16  331.87   16.60
   2  -4 -16  318.87   16.80
   1  -4 -16   75.69   10.90
   1  -4 -16   83.09   10.20
   0  -4 -16   20.40    6.30
   0  -4 -16   28.40    6.40
  -1  -4 -16   97.39   10.80
  -1  -4 -16   85.79    9.50
  -2  -4 -16  311.17   15.40
   7  -5 -16    4.20    5.70
  -7   5  16   15.80   12.30
   6  -5 -16    3.10    5.90
  -6   5  16    6.00    7.80
  -6   5  16    1.00   14.10
   5  -5 -16   16.70    6.90
  -5   5  16   49.80   14.40
  -5   5  16   28.50    9.00
   4  -5 -16   49.00    7.60
   4  -5 -16   53.09    9.20
   4  -5 -16   72.79   10.50
  -4   5  16   56.19   10.00
   3  -5 -16    8.30    7.30
  -3   5  16   16.50    8.20
   2  -5 -16  174.18   14.00
  -2   5  16  154.08   14.00
   1  -5 -16   62.79    8.20
   1  -5 -16   90.29   12.20
   0  -5 -16  105.29   12.00
   0  -5 -16  118.99   11.70
  -1  -5 -16   72.79    9.90
  -1  -5 -16   85.79    9.40
   6  -6 -16   27.20    6.60
  -6   6  16   20.40   16.50
   5  -6 -16   12.90   10.10
   5  -6 -16   18.50    7.20
  -5   6  16   27.80    8.70
  -5   6  16   19.40   16.00
   4  -6 -16   20.40    8.60
   4  -6 -16    7.60    6.80
  -4   6  16   15.60    8.70
   3  -6 -16  106.59   12.40
   3  -6 -16  101.79   15.40
   3  -6 -16   91.49   13.80
   3  -6 -16  101.89   15.10
   3  -6 -16   77.69   10.30
  -3   6  16  110.89   14.10
   2  -6 -16   56.49    8.90
   2  -6 -16   35.20   11.50
  -2   6  16   47.20    9.50
   1  -6 -16   43.30    8.40
   0  -6 -16   -1.90    7.30
  -1  -6 -16   58.89    9.90
  -1  -6 -16   58.49    9.50
   6  -7 -16    7.50    5.70
  -6   7  16   28.70   10.00
   5  -7 -16    8.50    7.20
   5  -7 -16   31.90    7.70
   4  -7 -16   25.70   10.00
   4  -7 -16    7.30    7.40
  -4   7  16   40.20    8.80
   3  -7 -16  178.28   15.30
   3  -7 -16  200.58   18.10
   3  -7 -16  217.98   23.50
   3  -7 -16  202.38   18.60
  -3   7  16  194.88   17.20
   2  -7 -16  124.59   16.80
   2  -7 -16  148.29   15.20
   2  -7 -16  144.69   13.30
   2  -7 -16  158.98   17.00
   2  -7 -16  155.48   15.50
  -2   7  16  111.69   15.60
   1  -7 -16   -3.90    8.00
   1  -7 -16    5.90   10.70
   1  -7 -16   11.20    8.40
   1  -7 -16   10.10    8.70
   0  -7 -16   47.90    9.70
   0  -7 -16   49.60   10.10
   0  -7 -16   65.49   13.80
  -1  -7 -16    5.40   10.90
  -1  -7 -16   11.20    8.40
  -1  -7 -16   -4.10    8.90
  -2  -7 -16  124.99   19.20
  -2  -7 -16  151.68   15.80
  -3  -7 -16  207.98   19.50
   5  -8 -16    7.60    6.40
   5  -8 -16    7.60    6.60
   4  -8 -16   19.50    6.90
   4  -8 -16   57.49    8.90
   3  -8 -16  -13.60   10.30
   3  -8 -16   37.00   11.30
   3  -8 -16   12.90    7.90
  -3   8  16    7.90    8.70
   2  -8 -16   34.30   10.80
   2  -8 -16   27.00   11.30
   2  -8 -16   40.70    9.60
  -2   8  16   24.30   10.20
   1  -8 -16  162.68   16.40
   1  -8 -16  172.68   18.80
   1  -8 -16  141.79   17.00
   1  -8 -16  156.08   19.50
  -1   8  16  153.88   17.40
   0  -8 -16   52.59   11.50
   0  -8 -16   37.10   13.20
   0  -8 -16   50.19   10.50
  -1  -8 -16  183.18   20.50
  -1  -8 -16  175.18   17.80
  -1  -8 -16  228.08   21.60
  -2  -8 -16   24.50    9.10
  -2  -8 -16   15.00   11.20
  -3  -8 -16   -1.80   10.90
  -3  -8 -16    5.60    9.00
  -4  -8 -16   14.30   10.10
   5  -9 -16   20.10    5.70
   4  -9 -16   80.19   10.70
   3  -9 -16   25.40   10.10
   3  -9 -16   12.80    7.30
   2  -9 -16    7.80    9.80
   2  -9 -16   15.80    9.50
   2  -9 -16   10.90   12.10
  -2   9  16   18.60    9.50
   1  -9 -16   94.09   12.40
   1  -9 -16   98.79   15.30
   1  -9 -16  109.19   15.00
  -1   9  16  105.89   15.10
   0  -9 -16   11.20    9.80
   0  -9 -16   11.00   12.10
  -1  -9 -16  119.59   17.10
  -1  -9 -16   86.99   14.90
  -2  -9 -16   -3.20    8.70
  -2  -9 -16   14.60   11.00
  -3  -9 -16   22.20   10.10
  -3  -9 -16    8.00    8.60
  -4  -9 -16   49.50   10.10
   4 -10 -16   34.30    7.60
   3 -10 -16   11.10    7.30
   2 -10 -16   13.00    7.90
   2 -10 -16   11.60   10.40
   2 -10 -16   29.60    9.20
   1 -10 -16    3.90    8.50
   1 -10 -16  -13.40    9.30
   1 -10 -16   14.00    8.40
  -1  10  16  -11.80    7.60
   0 -10 -16   -3.70   10.20
   0 -10 -16    5.70    9.10
   0  10  16   -1.30    8.80
  -1 -10 -16  -14.40    9.90
  -1 -10 -16    2.20    8.50
  -2 -10 -16    2.40    8.30
  -2 -10 -16   28.60   11.00
  -3 -10 -16    1.20    8.90
  -3 -10 -16   15.60    7.60
   2 -11 -16   -2.00    6.00
   1 -11 -16    9.30    8.20
   1 -11 -16    9.00    6.60
   0 -11 -16   13.60    6.20
   0 -11 -16    8.60    8.10
  -1 -11 -16   -2.20    7.50
  -1 -11 -16    7.10    5.70
  -2 -11 -16    4.80    7.30
  -2 -11 -16   -1.90    5.30
  -2 -11  17    5.00    8.30
  -1 -11  17   16.60    8.10
  -1 -11  17    0.30    6.10
   0 -11  17  -11.10    7.70
   0 -11  17   -4.20    6.50
   1 -11  17    0.10    5.80
   1 -11  17    7.60    8.10
  -3 -10  17   -0.10    5.70
  -3 -10  17   -0.20    8.50
  -2 -10  17   16.50    7.00
  -2 -10  17   29.40   11.40
  -1 -10  17   23.20    8.20
  -1 -10  17   27.60   13.00
   0 -10  17    0.80    8.20
   0 -10  17   18.30   13.20
   1 -10  17    4.30    7.20
   2 -10  17   17.00    5.40
   2 -10  17    6.40    5.40
   3 -10  17    5.30    4.30
   3 -10  17   11.20    5.20
  -4  -9  17   25.20    8.50
  -4  -9  17   28.90    6.40
  -3  -9  17    0.80    6.70
  -3  -9  17    3.40   10.00
  -2  -9  17   -4.20    8.10
  -2  -9  17   11.10   10.90
  -2  -9  17   -1.90    6.80
  -1  -9  17   18.30   12.10
  -1  -9  17   22.90    9.50
   0  -9  17   17.30   12.60
   0  -9  17   -3.00    9.40
   1  -9  17   15.30   10.50
   2  -9  17    2.50    5.80
   2  -9  17   -0.30    6.40
   3  -9  17    0.10    6.80
   3  -9  17    3.30    5.40
   4  -9  17   29.00    6.50
  -5  -8  17   28.50    8.20
  -5  -8  17   31.80    7.40
  -4  -8  17   -8.50    9.80
  -3  -8  17   35.40   11.40
  -2  -8  17   25.00    9.00
  -2  -8  17   34.40   11.40
  -1  -8  17   32.50    9.90
  -1  -8  17   46.20   11.40
   0  -8  17  131.09   15.70
  -1   8 -17   47.30    9.10
   1  -8  17   39.50   11.10
   1  -8  17   31.10    7.80
  -2   8 -17   47.10    9.10
   2  -8  17   44.90   10.70
   2  -8  17   34.30    8.10
   3  -8  17   10.00    8.60
   3  -8  17    8.10    6.00
   4  -8  17   11.90    7.70
   5  -8  17   35.70    6.80
  -6  -7  17   16.90    7.30
  -6  -7  17   17.60    6.20
  -5  -7  17   23.60    9.90
  -4  -7  17   13.90   10.30
  -3  -7  17   77.89   12.90
  -2  -7  17  249.58   17.70
  -2  -7  17  227.08   22.80
  -1  -7  17  150.68   15.80
   0  -7  17  153.58   15.00
  -1   7 -17  141.49   14.00
   1  -7  17  124.69   16.40
  -2   7 -17  295.87   18.00
   2  -7  17  276.07   20.20
  -3   7 -17  105.99   14.40
   3  -7  17  120.89   15.00
   4  -7  17   12.50    8.30
   5  -7  17   37.10    7.60
   6  -7  17    5.00    5.60
  -6  -6  17    6.00    8.70
  -5  -6  17   21.20   11.50
  -4  -6  17   12.70   10.80
  -3  -6  17   -4.90   10.60
  -2  -6  17   67.89   10.50
  -1  -6  17  309.47   19.30
   0   6 -17    6.20    6.00
   0  -6  17   16.60    8.70
  -1   6 -17  352.56   17.90
   1  -6  17  351.06   21.20
  -2   6 -17   55.39    9.30
   2  -6  17   78.29   12.00
  -3   6 -17    8.00    7.70
  -4   6 -17   21.80    9.00
   4  -6  17   13.40    8.20
  -5   6 -17    2.60   18.20
   5  -6  17   23.50    8.30
  -6   6 -17   11.90   14.50
  -7  -5  17   -2.30    6.50
  -6  -5  17   18.80    7.40
  -6  -5  17   11.70   10.60
  -5  -5  17   41.30   11.00
  -5  -5  17   35.50    9.80
  -4  -5  17   42.90   10.90
  -2  -5  17   37.40    8.30
  -1  -5  17   30.40    8.50
   0   5 -17  201.78   12.50
   0  -5  17  214.18   15.30
  -1   5 -17   39.50    7.30
   1  -5  17   34.20    9.00
  -2   5 -17   59.89    8.90
   2  -5  17   53.19    9.60
  -3   5 -17   80.89   10.20
   3  -5  17   55.49   10.00
  -4   5 -17   56.39   10.00
  -4   5 -17   35.70   17.00
   4  -5  17   65.09    9.70
  -5   5 -17   43.20   18.20
   5  -5  17   49.50    9.00
  -6   5 -17   14.00   18.10
  -7   5 -17  276.17   18.90
  -7  -4  17    8.50    8.80
  -7  -4  17    7.60    6.00
  -7  -4  17   11.90    6.60
  -6  -4  17   52.19   11.20
  -6  -4  17   49.99    9.80
  -6  -4  17   22.70    6.50
  -5  -4  17  114.19   15.80
  -5  -4  17   81.79   12.40
  -4  -4  17  157.08   20.70
  -2  -4  17   14.40    6.70
  -1  -4  17  144.69   13.30
   0   4 -17    9.00    5.40
   0  -4  17   10.20    7.00
  -1   4 -17  143.59   11.10
   1  -4  17  136.89   13.30
  -2   4 -17   12.20    6.70
   2  -4  17    9.60    7.40
  -3   4 -17   22.30    8.00
   3  -4  17   13.40    7.40
  -4   4 -17  137.99   14.50
  -5   4 -17  141.59   21.30
  -6   4 -17   59.69   18.60
  -7   4 -17    8.00   14.90
  -7  -3  17   11.50    6.70
  -7  -3  17   11.70    8.90
  -7  -3  17   -2.40    7.00
  -6  -3  17   44.80    9.70
  -6  -3  17   45.30   11.20
  -6  -3  17   74.39   10.90
  -5  -3  17   52.59   11.40
  -5  -3  17   68.59   11.80
  -4  -3  17   37.40    8.80
  -3  -3  17   75.19    9.50
  -2  -3  17    9.60    6.10
  -1  -3  17    3.00    7.00
   0   3 -17   -5.60    5.00
   0  -3  17   -3.30    6.20
  -1   3 -17    5.40    5.60
   1  -3  17    6.80    6.40
  -2   3 -17   -2.30    6.20
   2  -3  17   -5.20    5.70
  -3   3 -17  127.39   11.90
   3  -3  17  105.69   11.40
  -4   3 -17   65.59    9.40
  -5   3 -17   33.40   16.00
  -6   3 -17   42.00   17.20
  -7   3 -17   -2.80   15.70
  -7  -2  17    2.20    5.60
  -7  -2  17    2.40    9.50
  -7  -2  17    0.00    7.40
   6   2 -17    2.30    7.10
  -6  -2  17   16.90   10.20
  -6  -2  17   23.50   10.80
  -6  -2  17   18.10    9.20
   5   2 -17   57.09    9.90
   5   2 -17   65.79    9.10
  -5  -2  17   75.39   11.10
  -5  -2  17   68.49   11.40
  -5  -2  17   54.49   12.10
   4   2 -17  212.98   17.70
  -4  -2  17  129.69   15.10
  -3  -2  17  123.49   12.20
  -2  -2  17  224.28   13.90
   1   2 -17  315.57   13.80
  -1  -2  17  321.37   15.30
   0   2 -17  601.84   22.60
   0  -2  17  605.24   23.40
  -1   2 -17  412.26   17.50
   1  -2  17  387.56   17.20
  -2   2 -17  291.37   14.70
   2  -2  17  265.17   13.70
  -3   2 -17  153.48   11.70
  -4   2 -17  182.78   12.90
  -5   2 -17   30.50   14.90
  -6   2 -17    8.80   15.80
  -7   2 -17    0.60   16.10
  -8   2 -17   58.69   10.60
  -8  -1  17   92.19   11.30
  -8  -1  17   93.59    9.10
   7   1 -17   54.79    7.80
  -7  -1  17   58.39    9.60
  -7  -1  17   52.79    9.90
  -7  -1  17   57.79   11.80
   6   1 -17   56.09    8.80
  -6  -1  17   64.39   12.60
  -6  -1  17   59.39   11.30
  -6  -1  17   54.09   12.20
   5   1 -17   52.99    8.60
   5   1 -17   37.90    8.60
  -5  -1  17   51.99   10.00
  -5  -1  17   43.10   10.30
   4   1 -17  117.59   16.10
   4   1 -17  121.59   13.10
  -4  -1  17   93.39   12.90
  -3  -1  17    8.10    6.50
  -2  -1  17  269.67   14.60
   1   1 -17  224.38   11.20
  -1  -1  17  258.87   13.40
   0   1 -17  177.98   10.20
   0  -1  17  172.68   10.40
  -1   1 -17  242.48   12.50
   1  -1  17  258.67   12.20
  -2   1 -17  285.67   13.80
   2  -1  17  262.97   13.30
  -3   1 -17    4.70    5.40
  -6   1 -17   58.39   17.70
  -7   1 -17   74.99   17.90
  -8   1 -17   80.69   13.20
   8   0 -17   22.50    5.00
  -8   0  17   13.50    6.00
  -8   0  17   11.60    6.50
   7   0 -17   -3.20    6.20
  -7   0  17   -9.50    7.20
  -7   0  17   -0.50    8.40
  -7   0  17    0.90   10.80
   6   0 -17   50.29    8.50
  -6   0  17   49.40   10.20
  -6   0  17   36.90   11.20
  -6   0  17   36.90   11.80
   5   0 -17   97.49   13.50
   5   0 -17  112.09   12.10
  -5   0  17  115.59   15.80
   4   0 -17  162.28   13.70
   4   0 -17  141.99   15.50
  -4   0  17  137.19   14.20
   3   0 -17    3.90    5.80
   3   0 -17    8.60    6.80
   2   0 -17    2.90    5.10
  -2   0  17   19.40    6.40
   1   0 -17  733.53   25.90
   1   0 -17  727.73   26.00
  -1   0  17  736.03   26.60
   0   0 -17    0.80    4.40
   0   0 -17   -4.70    4.20
   0   0  17   -0.10    4.40
  -1   0 -17  684.03   24.30
   1   0  17  671.43   22.90
  -2   0 -17    7.90    5.00
  -3   0 -17    6.60    5.00
  -6   0 -17   16.30   16.30
  -7   0 -17   -6.80   17.10
   8  -1 -17   99.79    7.60
  -8   1  17   87.69   11.80
  -8   1  17   96.99    8.80
   7  -1 -17   71.59    8.70
  -7   1  17   54.19   10.00
  -7   1  17   63.19   10.00
  -7   1  17   73.29   13.60
   6  -1 -17   55.19    8.90
  -6   1  17   40.50   12.50
  -6   1  17   71.79   12.30
   5  -1 -17   42.70    7.70
   5  -1 -17   39.50    8.10
  -5   1  17   43.60    9.70
   4  -1 -17   94.79   14.10
   4  -1 -17  112.39   11.90
  -4   1  17  103.79   12.80
   3  -1 -17    5.30    5.50
   3  -1 -17   13.90    6.80
   2  -1 -17  240.08   13.50
   2  -1 -17  285.67   14.00
   1  -1 -17  238.68   12.30
   1  -1 -17  260.57   12.10
   0  -1 -17  161.38   10.20
   0  -1 -17  172.48   10.20
  -1  -1 -17  238.68   11.90
  -2  -1 -17  258.17   12.40
  -3  -1 -17    6.60    5.10
   8  -2 -17   54.89    6.60
  -8   2  17   60.79    7.90
   7  -2 -17    4.00    6.60
  -7   2  17    0.50    7.60
  -7   2  17    5.00   11.20
   6  -2 -17   22.70    7.70
  -6   2  17   18.40   10.00
  -6   2  17   10.30   11.80
   5  -2 -17   65.09    8.70
   5  -2 -17   93.49   13.10
  -5   2  17   79.99   11.30
  -5   2  17   63.59   14.30
   4  -2 -17  175.88   13.60
   4  -2 -17  160.98   15.50
  -4   2  17  198.78   14.80
   3  -2 -17  128.59   11.20
   2  -2 -17  259.27   13.70
   2  -2 -17  245.98   13.40
   1  -2 -17  365.36   15.80
   1  -2 -17  353.96   15.60
   0  -2 -17  521.15   20.10
   0  -2 -17  532.15   20.30
  -1  -2 -17  330.57   14.60
  -2  -2 -17  232.78   11.90
   7  -3 -17   13.30    6.80
  -7   3  17    9.00   11.50
  -7   3  17    8.70    7.20
   6  -3 -17   67.29    9.20
  -6   3  17   66.89   14.10
  -6   3  17   79.39   11.50
   5  -3 -17   55.59    7.70
   5  -3 -17   54.79    8.40
   5  -3 -17   57.49    8.90
  -5   3  17   27.50   13.70
  -5   3  17   46.80   10.10
   4  -3 -17   57.89    8.50
  -4   3  17   57.49    9.40
   3  -3 -17   81.19   11.10
   2  -3 -17    5.80    5.70
   2  -3 -17   -1.70    5.60
   1  -3 -17   10.00    5.50
   1  -3 -17    5.20    5.70
   0  -3 -17    0.40    5.30
   0  -3 -17    7.60    5.90
  -1  -3 -17    2.60    5.10
  -1  -3 -17   -0.10    7.90
  -2  -3 -17    3.30    5.30
   7  -4 -17   14.80    6.30
  -7   4  17   30.00   13.00
  -7   4  17   18.40    6.70
   6  -4 -17   42.50    7.40
   6  -4 -17   58.99    8.70
  -6   4  17   43.20    9.40
  -6   4  17   72.09   15.20
   5  -4 -17  142.69   12.60
   5  -4 -17  115.89   12.40
  -5   4  17  113.49   16.80
  -5   4  17  119.39   15.20
   4  -4 -17  120.49   13.90
   4  -4 -17  136.89   12.50
   4  -4 -17  122.19   14.30
  -4   4  17  168.28   14.80
   3  -4 -17   20.30    7.00
  -3   4  17   19.70    7.80
   2  -4 -17    4.00    6.70
   2  -4 -17    7.50    6.40
   1  -4 -17  139.99   12.20
   1  -4 -17  119.59   11.50
   0  -4 -17    0.80    5.70
   0  -4 -17   -6.60    5.80
  -1  -4 -17  119.69   10.60
  -1  -4 -17  119.49   11.60
  -2  -4 -17   13.70    6.30
  -7   5  17    8.90   12.40
   6  -5 -17   27.00    6.60
  -6   5  17   23.90   15.20
  -6   5  17   34.50    8.70
   5  -5 -17   51.59    8.10
   5  -5 -17   49.10   11.20
  -5   5  17   66.39   10.40
  -5   5  17   48.70   15.30
   4  -5 -17   46.00    9.40
   4  -5 -17   64.29    9.60
   4  -5 -17   51.89    7.80
  -4   5  17   49.30    9.90
   3  -5 -17   79.09   11.10
   3  -5 -17   79.59   10.10
   3  -5 -17   80.49   12.10
  -3   5  17   64.69   10.30
   2  -5 -17   48.40    8.20
  -2   5  17   43.10    9.20
   1  -5 -17   45.70    8.00
   1  -5 -17   26.30    8.40
   0  -5 -17  224.08   14.40
   0  -5 -17  226.08   15.60
  -1  -5 -17   35.80    7.40
  -1  -5 -17   35.10    8.00
  -2  -5 -17   45.80    8.00
   6  -6 -17    9.20    5.70
  -6   6  17    0.60   16.80
   5  -6 -17   15.10   10.00
   5  -6 -17   19.90    7.20
  -5   6  17   29.30    8.60
  -5   6  17   40.10   18.80
   4  -6 -17    7.70    6.90
   4  -6 -17    7.00    8.40
  -4   6  17   -0.80    7.90
   3  -6 -17    6.40    7.70
   3  -6 -17   13.80    6.70
   3  -6 -17   22.60    8.30
   3  -6 -17    6.40    9.70
   3  -6 -17   22.10    9.30
  -3   6  17   13.50    8.50
   2  -6 -17   58.49    9.60
   2  -6 -17   79.79   11.20
   2  -6 -17   72.99   10.00
   2  -6 -17   43.90   13.40
  -2   6  17   83.39   11.30
   1  -6 -17  354.16   20.10
   0  -6 -17   -4.40    7.60
  -1  -6 -17  374.66   19.30
  -1  -6 -17  354.86   20.80
   6  -7 -17   18.00    5.70
  -6   7  17    7.50    9.00
   5  -7 -17   47.50    7.80
   5  -7 -17   27.40    8.60
   4  -7 -17   26.50    8.20
   4  -7 -17   28.80    9.70
  -4   7  17   27.30    8.50
   3  -7 -17  131.49   16.30
   3  -7 -17   81.59   10.90
   3  -7 -17   88.89   13.10
   3  -7 -17  115.79   13.40
  -3   7  17  103.49   12.70
   2  -7 -17  263.57   20.00
   2  -7 -17  266.67   19.90
   2  -7 -17  267.37   18.30
   2  -7 -17  268.97   16.20
   2  -7 -17  283.47   19.30
  -2   7  17  239.58   18.70
   1  -7 -17  126.49   15.60
   1  -7 -17  157.48   18.60
   1  -7 -17  138.49   14.40
   1  -7 -17  131.89   16.60
   0  -7 -17  131.29   16.00
   0  -7 -17  169.38   17.00
   0  -7 -17  134.79   20.00
  -1  -7 -17  153.38   17.40
  -1  -7 -17  137.39   16.00
  -1  -7 -17  146.59   19.10
  -2  -7 -17  263.57   22.30
  -2  -7 -17  267.57   19.00
   5  -8 -17   43.70    7.40
   5  -8 -17   17.80    7.00
   4  -8 -17    1.80    7.20
   4  -8 -17    3.50    6.20
  -4   8  17    9.00    8.50
   3  -8 -17   43.40   11.40
   3  -8 -17   37.30   11.70
   3  -8 -17   44.00    8.90
  -3   8  17   37.30    9.60
   2  -8 -17   29.80   10.90
   2  -8 -17   44.90   11.90
   2  -8 -17   59.09   10.20
  -2   8  17   37.50   10.30
   1  -8 -17   41.60   12.40
   1  -8 -17   30.40   10.30
   1  -8 -17   48.30   10.40
  -1   8  17   41.10   11.30
   0  -8 -17  176.38   17.40
   0  -8 -17  178.28   21.00
  -1  -8 -17   43.70   10.20
  -1  -8 -17   34.10   12.50
  -2  -8 -17   51.89   10.30
  -2  -8 -17   33.50   11.80
  -3  -8 -17   50.39   12.50
   4  -9 -17   41.60    7.30
   4  -9 -17   25.70    7.80
   3  -9 -17   14.90    9.50
   3  -9 -17   -0.20    6.90
  -3   9  17    7.40   11.20
   2  -9 -17   -3.20    9.10
   2  -9 -17  -11.00    8.60
   2  -9 -17   12.20   11.40
  -2   9  17    1.50    8.80
   1  -9 -17   13.50   10.10
   1  -9 -17   17.50    9.60
   1  -9 -17   16.30   10.80
  -1   9  17   33.30   10.30
   0  -9 -17    2.30    9.50
   0  -9 -17   12.30   11.60
  -1  -9 -17   26.90   12.70
  -1  -9 -17   42.10   10.40
  -2  -9 -17    6.30    9.40
  -2  -9 -17    4.30   10.70
  -3  -9 -17    5.70    8.40
  -3  -9 -17   -3.60    9.30
   3 -10 -17   -7.60    6.70
   2 -10 -17   26.70    8.10
   2 -10 -17   10.60    9.80
   2 -10 -17   21.40    8.50
   1 -10 -17   24.30   10.40
   1 -10 -17   37.60    8.80
   1 -10 -17   14.50    8.50
  -1  10  17   24.90    8.60
   0 -10 -17   19.90   10.70
   0 -10 -17   20.50    9.00
   0  10  17   14.50    8.80
  -1 -10 -17   19.10   10.90
  -1 -10 -17   36.60    9.50
  -2 -10 -17   26.40   10.60
  -2 -10 -17   35.00    9.10
  -3 -10 -17    3.70    8.80
  -3 -10 -17    3.30    7.20
   1 -11 -17    7.30    6.00
   1 -11 -17    3.50    7.40
   0 -11 -17   -1.40    5.60
   0 -11 -17    1.70    7.50
  -1 -11 -17    4.80    5.40
  -1 -11 -17    5.70    7.00
  -2 -11 -17    6.30    5.60
  -2 -11 -17    9.90    9.70
  -1 -11  18   18.30    7.80
  -1 -11  18   23.50    8.10
   0 -11  18   56.69    8.90
   0 -11  18   57.39    9.00
   1 -11  18   11.10    8.00
   1 -11  18   13.10    5.90
  -3 -10  18   10.00    5.80
  -3 -10  18    6.30    8.90
  -2 -10  18   36.10   11.60
  -2 -10  18   40.40    7.60
  -1 -10  18    1.60   12.00
  -1 -10  18   22.30    8.10
   0 -10  18   20.60   12.90
   0 -10  18    4.40    8.10
   1 -10  18   12.00    6.40
   2 -10  18   16.30    5.40
   2 -10  18   14.20    5.40
   3 -10  18    0.00    4.80
   3 -10  18    6.80    4.10
  -4  -9  18   13.50    5.60
  -4  -9  18   12.50    8.20
  -3  -9  18   11.80   10.30
  -3  -9  18    6.00    6.60
  -2  -9  18   33.20    7.70
  -2  -9  18   39.20    9.20
  -2  -9  18   44.60   12.10
  -1  -9  18   55.69   10.50
  -1  -9  18   55.99   13.60
   0  -9  18   30.20   13.90
   0  -9  18   40.90   10.90
   1  -9  18   52.69   11.40
   2  -9  18   37.00    7.40
   2  -9  18   25.20    7.50
   3  -9  18    0.30    5.10
   3  -9  18    6.00    6.90
   4  -9  18   15.60    5.90
  -5  -8  18   12.40    7.80
  -5  -8  18   -0.90    6.40
  -4  -8  18   18.50   10.50
  -3  -8  18   27.60   11.40
  -2  -8  18   19.10    9.20
  -2  -8  18   20.10   10.80
  -1  -8  18   69.39   12.70
  -1  -8  18   92.39   12.40
   0  -8  18  140.89   16.30
  -1   8 -18   70.69   10.30
   1  -8  18   81.49   12.30
   1  -8  18   80.49   12.80
  -2   8 -18   28.00    8.60
   2  -8  18   16.10    9.60
   2  -8  18   27.80    7.90
   3  -8  18    6.60    9.00
   3  -8  18   -7.70    7.90
   4  -8  18   28.30    8.20
   5  -8  18   16.30    6.20
  -6  -7  18   -5.80    5.60
  -6  -7  18   11.60    6.60
  -5  -7  18   11.10    9.50
  -4  -7  18   40.40   11.30
  -3  -7  18    1.00   10.10
  -2  -7  18   56.89   11.70
  -2  -7  18   41.80   10.00
  -1  -7  18  191.68   17.00
  -1  -7  18  175.28   24.90
   0  -7  18  137.79   15.20
  -1   7 -18  215.58   15.70
   1  -7  18  215.78   18.50
  -2   7 -18   32.80    8.80
   2  -7  18   55.49   11.60
  -3   7 -18   15.30    8.60
   3  -7  18   14.90    8.70
   4  -7  18   48.30    9.30
   5  -7  18    5.80    6.40
   6  -7  18   15.90    6.00
  -6  -6  18  132.29   16.20
  -5  -6  18   68.89   13.20
  -4  -6  18   32.80   12.50
  -3  -6  18   45.50   12.80
  -2  -6  18  246.68   17.30
  -1  -6  18  135.99   15.20
   0   6 -18   -8.00    6.40
   0  -6  18   -2.00    8.40
  -1   6 -18  200.08   14.50
   1  -6  18  170.28   16.60
  -2   6 -18  273.87   17.00
   2  -6  18  236.08   18.90
  -3   6 -18   42.80    9.50
  -4   6 -18   39.00    9.70
   4  -6  18   57.99    9.40
  -5   6 -18   70.39   20.80
   5  -6  18   74.69    9.90
  -6   6 -18   85.89   16.00
  -7  -5  18    4.90    6.40
  -6  -5  18    8.40   10.60
  -6  -5  18    2.70    6.40
  -5  -5  18   -4.60   10.10
  -4  -5  18    9.50   10.20
  -2  -5  18  138.19   13.30
  -1  -5  18  114.39   13.70
   0   5 -18   -1.20    5.70
   0  -5  18   -5.30    7.40
  -1   5 -18  124.59   11.30
   1  -5  18  115.69   14.50
  -2   5 -18  172.98   13.60
   2  -5  18  152.08   15.50
  -3   5 -18   35.00    9.20
  -4   5 -18   29.90   17.00
  -4   5 -18   12.90    8.80
   4  -5  18    9.50    7.90
  -5   5 -18   25.90   17.20
   5  -5  18   15.90    7.90
  -6   5 -18    2.40   17.80
  -7   5 -18    1.50    9.50
  -7  -4  18   11.40    6.30
  -7  -4  18   10.00    5.80
  -7  -4  18   14.60    9.00
  -6  -4  18   34.30    8.40
  -6  -4  18   53.09   11.80
  -5  -4  18   66.49   12.00
  -5  -4  18   70.39   11.20
  -3  -4  18    5.20    7.00
  -2  -4  18   70.19   10.70
  -1  -4  18  135.19   13.40
   0   4 -18   52.09    7.20
   0  -4  18   45.50    8.80
  -1   4 -18  115.49   11.00
   1  -4  18  136.29   12.70
  -2   4 -18   91.79   11.80
   2  -4  18  113.59   12.60
  -3   4 -18    6.60    7.60
   3  -4  18    9.60    7.40
  -4   4 -18   94.19   11.20
  -5   4 -18  106.29   19.90
  -6   4 -18   45.00   18.20
  -7   4 -18   10.50   13.90
  -7  -3  18    0.60    8.50
  -7  -3  18    8.30    7.00
  -7  -3  18    5.40    6.00
  -6  -3  18    7.20   10.30
  -6  -3  18   10.10    7.60
  -6  -3  18    4.40    8.40
  -5  -3  18   50.19   11.20
  -5  -3  18   53.69   11.10
  -4  -3  18   -0.80    7.70
  -3  -3  18   78.89    9.80
  -2  -3  18   29.80    7.20
  -1  -3  18  123.19   12.10
   0   3 -18  222.08   12.70
   0  -3  18  228.48   14.00
  -1   3 -18  125.99   11.20
   1  -3  18  154.58   11.70
  -2   3 -18   41.60    7.80
   2  -3  18   55.09    7.90
  -3   3 -18   99.99   12.50
   3  -3  18   76.89   10.80
  -4   3 -18    3.50    7.40
  -5   3 -18   48.20   16.80
  -6   3 -18    9.70   16.70
  -7   3 -18   -0.30   15.40
  -7  -2  18   54.09    8.80
  -7  -2  18   85.29   12.20
  -7  -2  18   73.69    9.60
   6   2 -18    7.30    6.80
  -6  -2  18    1.00    9.70
  -6  -2  18    0.70   10.00
  -6  -2  18    3.10    8.80
   5   2 -18   46.80    9.70
   5   2 -18   40.50    8.20
  -5  -2  18   22.80   11.10
  -5  -2  18   45.20   10.80
   4   2 -18   42.50   10.30
  -4  -2  18   56.79    9.90
  -3  -2  18   -9.40    6.10
  -2  -2  18  336.57   16.90
   1   2 -18  129.09    9.00
  -1  -2  18  153.78   11.10
   0   2 -18  155.08   10.20
   0  -2  18  154.58   11.50
  -1   2 -18  169.68   11.60
   1  -2  18  153.98   11.30
  -2   2 -18  388.36   17.50
   2  -2  18  367.16   16.50
  -3   2 -18   13.00    6.70
  -4   2 -18   43.20    7.80
  -5   2 -18   22.60   15.40
  -6   2 -18    1.50   15.60
  -7   2 -18   66.19   18.00
  -8  -1  18   -0.10    7.20
  -8  -1  18    5.00    5.90
   7   1 -18   10.40    6.20
  -7  -1  18    9.50    7.10
  -7  -1  18   -6.00    6.90
  -7  -1  18   -1.00   10.40
   6   1 -18   39.90    8.30
  -6  -1  18   37.20    9.80
  -6  -1  18   44.90   11.50
  -6  -1  18   31.20   11.90
   5   1 -18    6.70    6.80
   5   1 -18   10.70    7.80
   5   1 -18   11.30    7.20
  -5  -1  18   15.10   10.70
  -5  -1  18    9.80    9.50
  -5  -1  18    3.60    8.40
   4   1 -18   58.39   10.80
   4   1 -18   67.09    9.10
  -4  -1  18   57.19    9.60
  -3  -1  18  144.89   12.50
  -2  -1  18  188.78   12.70
   1   1 -18   50.19    7.00
  -1  -1  18   32.90    6.70
   0   1 -18   25.20    5.60
   0  -1  18   35.10    5.50
  -1   1 -18   36.90    6.00
   1  -1  18   41.20    5.60
  -2   1 -18  173.78   11.10
  -3   1 -18  144.19   10.70
  -5   1 -18   30.50   21.20
  -6   1 -18   30.70   16.60
  -7   1 -18   31.50   16.30
  -8   1 -18   10.10    9.30
   8   0 -18   -8.60    5.50
  -8   0  18   -2.80    5.10
  -8   0  18    5.10    6.20
   7   0 -18    1.10    6.10
  -7   0  18    5.80    7.70
  -7   0  18   15.90   11.30
  -7   0  18    1.30    8.10
   6   0 -18   10.30    7.40
  -6   0  18    1.50    8.50
  -6   0  18   13.10   10.40
  -6   0  18    3.20   11.10
   5   0 -18   89.79   10.50
   5   0 -18   96.29   11.00
  -5   0  18   97.29   12.90
  -5   0  18   92.29   14.20
   4   0 -18  246.78   18.30
   4   0 -18  266.57   16.10
  -4   0  18  236.28   16.10
   3   0 -18   22.70    6.50
   3   0 -18   27.50    8.10
   2   0 -18  469.75   19.80
  -2   0  18  496.25   20.40
   1   0 -18  131.09    9.20
   1   0 -18  146.19    9.70
  -1   0  18  135.89   10.00
   0   0 -18  248.18   12.10
   0   0 -18  231.28   11.40
   0   0  18  257.27   11.70
  -1   0 -18  117.79    9.20
   1   0  18  133.09    7.60
  -2   0 -18  424.76   17.20
  -3   0 -18   18.60    5.40
  -6   0 -18   -2.90   15.50
  -7   0 -18    4.10   14.60
   8  -1 -18   15.90    4.90
  -8   1  18    8.20    5.20
  -8   1  18    4.30    6.20
   7  -1 -18   -1.00    6.40
  -7   1  18    9.50   11.30
  -7   1  18    6.20    8.00
  -7   1  18    9.20    8.00
   6  -1 -18   32.20    8.30
  -6   1  18   49.60   12.60
  -6   1  18   24.70   10.70
   5  -1 -18   12.90    7.30
   5  -1 -18    6.20    6.80
  -5   1  18    4.50    8.10
  -5   1  18    3.80   11.20
   4  -1 -18   54.69   10.00
   4  -1 -18   54.19    8.10
  -4   1  18   52.19    9.60
   3  -1 -18  157.48   11.90
   2  -1 -18  179.88   11.40
   2  -1 -18  162.78   14.30
   1  -1 -18   43.80    5.70
   1  -1 -18   38.60    5.80
   0  -1 -18   28.90    5.30
   0  -1 -18   23.60    5.30
  -1  -1 -18   56.49    6.70
  -2  -1 -18  169.88   10.40
  -3  -1 -18  152.28   10.30
   7  -2 -18   87.29   10.80
  -7   2  18  109.59   14.40
  -7   2  18   90.89   11.10
  -7   2  18   76.69   10.90
   6  -2 -18    5.20    7.20
  -6   2  18   -5.60   11.30
  -6   2  18    0.30    9.30
   5  -2 -18   41.10    8.40
   5  -2 -18   40.90    7.80
  -5   2  18   37.30    9.60
  -5   2  18   34.40   13.10
   4  -2 -18   38.80    8.00
  -4   2  18   53.29    9.50
   3  -2 -18   -2.00    6.00
   2  -2 -18  349.37   16.10
   2  -2 -18  326.97   15.80
   1  -2 -18  142.79   10.20
   1  -2 -18  139.99   10.10
   0  -2 -18  156.68   10.50
   0  -2 -18  149.69   10.20
  -1  -2 -18  128.79    9.70
  -2  -2 -18  283.37   13.60
   7  -3 -18    3.60    6.40
  -7   3  18    1.50    6.70
  -7   3  18   19.70   11.70
   6  -3 -18   11.00    7.40
  -6   3  18   14.40    8.90
  -6   3  18   29.00   13.40
   5  -3 -18   55.39    8.70
   5  -3 -18   66.69    9.20
   5  -3 -18   55.69    7.60
  -5   3  18   54.39   14.30
  -5   3  18   54.09   10.60
   4  -3 -18    7.20    6.70
   4  -3 -18   12.70    8.70
   4  -3 -18   16.00    8.80
  -4   3  18    5.40    7.70
   3  -3 -18   79.19   10.40
  -3   3  18   86.69   10.60
   2  -3 -18   37.00    7.00
   2  -3 -18   43.40    7.10
   1  -3 -18  129.49   11.10
   1  -3 -18  128.19   10.70
   0  -3 -18  168.48   12.10
   0  -3 -18  197.28   12.20
  -1  -3 -18  114.19    9.80
  -2  -3 -18   47.20    6.70
   7  -4 -18   -0.30    5.80
  -7   4  18   11.00   12.80
  -7   4  18    5.20    8.90
   6  -4 -18   51.39    7.40
   6  -4 -18   68.59    9.00
  -6   4  18   71.59   15.70
  -6   4  18   55.29   10.00
   5  -4 -18   84.59   11.30
   5  -4 -18   52.99    7.80
  -5   4  18   75.59   11.10
  -5   4  18   78.19   15.80
   4  -4 -18   91.49   11.70
   4  -4 -18   92.49   11.50
   4  -4 -18   82.99   10.30
  -4   4  18   79.29   11.00
   3  -4 -18    7.30    6.50
  -3   4  18   -1.30    7.10
   2  -4 -18   80.89   11.00
   2  -4 -18   96.79   12.90
   1  -4 -18  112.19   11.90
   1  -4 -18  102.79   11.00
   0  -4 -18   32.40    7.00
   0  -4 -18   59.49    8.10
  -1  -4 -18  121.49   11.40
  -1  -4 -18  132.09   11.20
  -2  -4 -18   82.49    9.60
  -7   5  18   -1.60   11.40
   6  -5 -18    4.40    5.80
  -6   5  18    6.80   15.90
  -6   5  18    3.20    7.30
   5  -5 -18  -15.70    9.30
   5  -5 -18    3.50    6.20
  -5   5  18   13.20    8.30
  -5   5  18   28.60   15.80
   4  -5 -18   10.50    6.40
   4  -5 -18    8.50    7.70
   4  -5 -18    9.20    8.00
  -4   5  18    8.30    8.50
   3  -5 -18   27.80    8.40
   3  -5 -18   47.30    9.00
   3  -5 -18   32.90    6.80
   3  -5 -18   38.70   12.20
   3  -5 -18   37.80    9.30
  -3   5  18   49.50    9.20
   2  -5 -18  147.69   14.40
  -2   5  18  178.08   15.40
   1  -5 -18  104.09   12.90
   1  -5 -18   95.79   12.70
   0  -5 -18    2.10    7.10
   0  -5 -18   13.10    7.10
  -1  -5 -18   93.99   12.80
  -1  -5 -18  109.09   11.30
  -2  -5 -18  188.38   13.40
   6  -6 -18  139.69   11.20
  -6   6  18  155.68   25.50
   5  -6 -18   47.70   10.70
   5  -6 -18   79.09    9.10
  -5   6  18   66.89   10.20
   4  -6 -18   50.59    8.40
   4  -6 -18   57.39   10.60
  -4   6  18   58.39   10.20
   3  -6 -18   45.50   11.00
   3  -6 -18   34.30    7.40
   3  -6 -18   41.90   10.10
   3  -6 -18   52.49    9.20
   3  -6 -18   32.00    8.60
  -3   6  18   38.30    9.90
   2  -6 -18  261.37   19.20
   2  -6 -18  249.08   18.00
   2  -6 -18  239.48   15.40
   2  -6 -18  303.77   17.30
   2  -6 -18  268.47   18.00
  -2   6  18  234.58   17.40
   1  -6 -18  181.58   15.30
   0  -6 -18   10.50    8.90
   0  -6 -18   14.10    8.20
  -1  -6 -18  200.18   16.90
  -1  -6 -18  189.48   15.10
  -2  -6 -18  237.28   17.40
   6  -7 -18    8.50    5.40
  -6   7  18   24.60    8.90
   5  -7 -18   10.10    7.00
   5  -7 -18   11.40    7.90
  -5   7  18    5.30    6.90
   4  -7 -18   55.89   10.80
   4  -7 -18   64.09    9.10
  -4   7  18   42.20    9.20
   3  -7 -18   29.60   10.10
   3  -7 -18    0.50    9.70
   3  -7 -18   13.30    8.30
   3  -7 -18    3.60    7.00
  -3   7  18   11.80    8.80
   2  -7 -18   63.59   10.10
   2  -7 -18   59.09   10.70
   2  -7 -18   52.09    8.30
   2  -7 -18   41.70   10.70
   2  -7 -18   50.49   11.80
  -2   7  18   53.99   10.60
   1  -7 -18  172.78   19.00
   1  -7 -18  203.28   17.10
   1  -7 -18  204.88   17.30
   1  -7 -18  185.58   16.60
  -1   7  18  210.08   17.30
   0  -7 -18  185.98   21.20
   0  -7 -18  178.58   15.80
   0  -7 -18  178.58   16.40
  -1  -7 -18  237.68   21.00
  -1  -7 -18  210.78   17.60
  -1  -7 -18  194.08   18.30
  -2  -7 -18   49.50    9.60
   5  -8 -18    1.20    6.00
   5  -8 -18   -0.10    6.10
   4  -8 -18    9.40    7.70
   4  -8 -18   21.20    7.40
  -4   8  18   29.20    7.90
   3  -8 -18    0.60    8.60
   3  -8 -18   12.40   10.20
   3  -8 -18    5.70    7.50
  -3   8  18   -3.60    8.00
   2  -8 -18   25.30   10.60
   2  -8 -18   21.10    9.20
   2  -8 -18   26.80   11.20
  -2   8  18   14.80    9.50
   1  -8 -18   97.19   12.60
   1  -8 -18   84.89   13.70
   1  -8 -18   74.89   11.20
  -1   8  18   99.79   13.40
   0  -8 -18  129.79   17.00
   0  -8 -18  136.69   20.00
  -1  -8 -18   77.19   11.20
  -1  -8 -18   89.59   15.00
  -2  -8 -18   20.40    9.20
  -2  -8 -18   12.10   11.20
   4  -9 -18    7.10    5.60
   4  -9 -18   20.80    6.70
   3  -9 -18    1.70    8.70
   3  -9 -18    7.80    7.00
  -3   9  18    4.70    7.20
   2  -9 -18   46.60   12.30
   2  -9 -18   28.60   10.20
   2  -9 -18   18.90    9.50
  -2   9  18   33.30    9.40
   1  -9 -18   55.19   12.10
   1  -9 -18   48.60   11.00
   1  -9 -18   53.19   10.50
  -1   9  18   56.29   11.20
   0  -9 -18   36.00   10.90
   0  -9 -18   42.00   12.90
  -1  -9 -18   51.59   13.60
  -1  -9 -18   81.89   12.10
  -2  -9 -18   50.79   12.70
  -2  -9 -18   38.90   10.00
  -3  -9 -18   12.20    8.50
  -3  -9 -18   11.20    9.90
   3 -10 -18    6.60    7.10
   2 -10 -18   45.20   10.10
   2 -10 -18   38.30    8.70
   2 -10 -18   32.00    8.20
  -2  10  18   32.40    7.50
   1 -10 -18   23.20    8.50
   1 -10 -18   18.30    8.10
   1 -10 -18   17.20    9.90
  -1  10  18   28.30    8.50
   0 -10 -18    5.00    8.40
   0 -10 -18   16.00    9.80
   0  10  18   20.60    8.80
  -1 -10 -18   23.90   10.20
  -1 -10 -18   12.40    8.60
  -2 -10 -18   45.20    9.20
  -2 -10 -18   28.80   10.30
  -3 -10 -18    0.40    8.50
  -3 -10 -18    4.60    6.80
   1 -11 -18   13.90    6.00
   1 -11 -18   15.90    7.20
   0 -11 -18   51.69    7.10
   0 -11 -18   36.90    8.20
  -1 -11 -18   11.80    5.40
  -1 -11 -18   13.40    7.00
  -1 -11  19    7.20    7.50
   0 -11  19   -6.80    5.90
   0 -11  19    2.60    7.10
   1 -11  19   -1.40    5.30
  -3 -10  19   14.10    9.30
  -3 -10  19    1.70    5.40
  -2 -10  19   23.40   10.50
  -2 -10  19   21.20    6.80
  -1 -10  19   32.30    8.30
  -1 -10  19   11.20   11.30
   0 -10  19   31.60    8.80
   0 -10  19   26.40   12.30
   1 -10  19   13.10    6.10
   2 -10  19    6.20    5.00
   2 -10  19    5.00    4.90
   3 -10  19    7.80    4.80
  -4  -9  19   33.50    8.70
  -4  -9  19   29.60    5.80
  -3  -9  19   22.70   10.90
  -3  -9  19   15.50    6.70
  -2  -9  19   15.20    8.50
  -2  -9  19   27.60    7.60
  -2  -9  19   17.10   11.80
  -1  -9  19   15.00   12.90
  -1  -9  19   10.90    8.80
   0  -9  19   47.80   11.40
   1  -9  19    8.30    9.40
   2  -9  19   11.50    6.60
   2  -9  19   29.20    7.00
   3  -9  19   12.30    5.20
   3  -9  19   29.30    7.30
  -4   9 -19   26.90   10.50
   4  -9  19   41.50    6.30
  -5  -8  19   26.90    6.90
  -5  -8  19   21.60    7.80
  -4  -8  19    4.20   10.30
  -3  -8  19    5.50   11.30
  -2  -8  19   48.70   12.10
  -2  -8  19   25.60    9.50
  -1  -8  19   59.49   13.00
  -1  -8  19   85.69   11.90
   0  -8  19   10.30    9.60
  -1   8 -19   74.99   10.40
   1  -8  19   84.49   12.80
   1  -8  19   82.29   12.60
  -2   8 -19   45.70    9.40
   2  -8  19   55.09    8.90
   2  -8  19   63.49   11.10
   3  -8  19   10.50    8.20
   4  -8  19    9.10    7.40
   5  -8  19   42.20    6.60
  -6  -7  19   15.30    5.90
  -6  -7  19   20.20    6.70
  -5  -7  19   12.20    9.60
  -4  -7  19   53.69   11.80
  -3  -7  19   50.19   11.90
  -2  -7  19  190.28   22.00
  -2  -7  19  177.68   16.60
  -1  -7  19   21.90    9.80
   0  -7  19  -14.70    8.40
  -1   7 -19   31.20    8.80
   1  -7  19   37.50   10.70
  -2   7 -19  223.98   16.60
   2  -7  19  194.78   18.50
  -3   7 -19   48.20    9.70
   3  -7  19   45.50    9.80
   4  -7  19   86.09   10.60
   5  -7  19   15.10    6.50
  -6  -6  19   47.60    9.80
  -5  -6  19   -5.60   11.20
  -4  -6  19    3.50   11.40
  -3  -6  19   -5.50   11.00
  -2  -6  19  172.68   15.80
  -1  -6  19   60.19   10.70
   0   6 -19  165.28   13.40
   0  -6  19  171.28   16.20
   0  -6  19  150.68   15.20
  -1   6 -19   64.19    9.30
   1  -6  19   49.40   10.70
  -2   6 -19  174.88   15.30
   2  -6  19  168.98   17.50
  -3   6 -19   12.50    8.30
  -4   6 -19    0.60    8.30
   4  -6  19    9.90    8.40
  -5   6 -19  -14.40   18.20
   5  -6  19    0.00    7.40
  -6   6 -19   48.90   12.80
  -7  -5  19   48.00    7.20
  -6  -5  19   13.60   11.00
  -6  -5  19    5.90    6.30
  -5  -5  19   26.00   11.50
  -4  -5  19   82.59   12.90
  -2  -5  19   37.00    8.00
  -1  -5  19   59.39   10.00
   0   5 -19    6.80    6.60
   0  -5  19    0.50    7.80
  -1   5 -19   47.30    8.30
   1  -5  19   46.90   10.00
  -2   5 -19   56.39    9.30
   2  -5  19   26.90    9.30
  -3   5 -19   64.79   11.70
  -3   5 -19   37.40    9.20
  -4   5 -19  145.89   14.90
  -4   5 -19  135.69   21.50
   4  -5  19  165.78   14.90
  -5   5 -19   27.60   18.10
   5  -5  19   25.00    8.20
  -6   5 -19   -6.30   17.80
  -7   5 -19   42.80    9.90
  -7  -4  19    5.60    8.40
  -6  -4  19    7.90    6.90
  -6  -4  19   31.00   11.30
  -5  -4  19   20.40   10.50
  -5  -4  19   18.30    9.10
  -4  -4  19    4.40   10.30
  -3  -4  19   74.09   10.10
  -2  -4  19   64.29    8.90
  -1  -4  19  158.48   14.20
   0   4 -19   15.20    6.20
   0  -4  19    5.20    7.40
  -1   4 -19  162.78   12.30
   1  -4  19  139.39   13.90
  -2   4 -19   70.59    9.20
   2  -4  19   95.19   12.70
  -3   4 -19   85.89   10.50
   3  -4  19   84.99   12.80
  -4   4 -19  -14.30   28.10
  -4   4 -19   10.10    8.50
  -5   4 -19   -3.40   15.90
  -6   4 -19   29.60   17.80
  -7   4 -19   10.30   14.00
  -7  -3  19   12.40    6.20
  -7  -3  19   24.10    9.20
  -7  -3  19    2.90    6.30
  -6  -3  19   18.80   10.80
  -6  -3  19    5.60    6.40
  -5  -3  19    0.80    9.60
  -5  -3  19   27.10   10.30
  -4  -3  19  123.69   15.30
  -3  -3  19   46.70    8.60
  -2  -3  19   22.50    7.10
  -1  -3  19   -4.90    6.30
   0   3 -19   16.80    6.10
   0  -3  19    4.00    7.00
  -1   3 -19   -7.30    6.10
   1  -3  19   -2.20    6.40
  -2   3 -19   26.90    7.20
   2  -3  19   11.90    6.80
  -3   3 -19   63.39    9.30
  -4   3 -19  181.88   14.70
  -5   3 -19   17.70   15.70
  -6   3 -19    6.30   16.70
  -7   3 -19   27.20   16.30
   7   2 -19   -5.60    7.60
  -7  -2  19   -1.70    6.70
  -7  -2  19    2.50    9.70
  -7  -2  19    1.20    6.00
   6   2 -19   48.40    7.90
  -6  -2  19   34.90    9.60
  -6  -2  19   27.80    9.80
  -6  -2  19   39.70   11.60
   5   2 -19   99.49   11.80
   5   2 -19   70.29    9.10
  -5  -2  19   63.19   13.10
  -5  -2  19   72.89   12.00
   4   2 -19  115.89   17.30
  -4  -2  19  115.19   14.70
  -3  -2  19   79.39   11.40
  -2  -2  19   28.70    7.20
   1   2 -19  136.19    9.00
  -1  -2  19  130.49   10.90
   0   2 -19  133.99    9.80
   0  -2  19  129.49   11.50
  -1   2 -19  138.49   11.20
   1  -2  19  153.58   11.30
  -2   2 -19   29.30    7.30
   2  -2  19   29.90    6.30
  -3   2 -19   81.79   10.70
  -4   2 -19   91.59   11.80
  -5   2 -19  129.69   20.40
  -6   2 -19   42.30   17.00
  -7   2 -19   -2.80   15.40
   7   1 -19   66.99    9.20
  -7  -1  19   52.09    8.70
  -7  -1  19   64.39   12.10
   6   1 -19   98.39   12.00
  -6  -1  19   99.19   13.50
  -6  -1  19  113.09   17.50
  -6  -1  19  149.88   22.10
   5   1 -19   26.60    7.90
   5   1 -19   15.00    7.30
   5   1 -19   18.70    8.70
  -5  -1  19   28.90   10.30
  -5  -1  19   24.10   11.80
   4   1 -19   11.00    9.70
   4   1 -19    4.40    7.00
  -4  -1  19    6.50    7.80
   3   1 -19   20.00    8.20
  -3  -1  19   16.90    7.00
  -2  -1  19   60.19    8.20
   1   1 -19  784.12   27.70
  -1  -1  19  789.42   28.70
   0   1 -19   18.90    5.20
   0  -1  19    9.90    5.10
  -1   1 -19  769.62   28.00
   1  -1  19  783.22   27.00
  -2   1 -19   57.09    7.20
  -3   1 -19   31.60    6.60
  -5   1 -19    0.30   14.80
  -6   1 -19   77.69   18.40
  -7   1 -19   45.90   16.50
   7   0 -19   12.40    6.50
  -7   0  19   19.80   11.50
  -7   0  19   12.10    7.70
  -7   0  19   15.10    8.30
   6   0 -19   -0.70    7.20
  -6   0  19   -3.60    8.30
  -6   0  19   12.50   10.30
  -6   0  19    6.30   11.10
   5   0 -19   14.60    7.30
   5   0 -19    1.00    6.80
  -5   0  19    2.50   10.50
  -5   0  19    5.20    9.10
   4   0 -19  207.08   15.50
   4   0 -19  165.88   16.40
  -4   0  19  185.08   15.40
   3   0 -19   41.00    7.40
   2   0 -19   53.79    7.10
  -2   0  19   50.59    7.70
   1   0 -19   38.00    6.10
   1   0 -19   21.80    5.40
  -1   0  19   34.70    6.40
   0   0 -19   -3.50    4.70
   0   0  19   -0.80    4.50
  -1   0 -19   26.80    5.60
   1   0  19   26.60    4.30
  -2   0 -19   53.59    6.50
  -3   0 -19   32.40    6.20
  -5   0 -19    9.40   15.40
  -6   0 -19    2.80   15.80
  -7   0 -19    8.60   14.60
   7  -1 -19   51.09    7.90
  -7   1  19   64.79    9.90
  -7   1  19   58.79   13.20
  -7   1  19   68.89   10.10
   6  -1 -19  142.99   13.30
  -6   1  19  144.89   22.40
  -6   1  19  138.39   17.70
   5  -1 -19   24.00    7.70
   5  -1 -19   11.70    7.00
  -5   1  19   29.20   12.30
  -5   1  19   14.90    8.80
   4  -1 -19    2.40    6.10
  -4   1  19    8.60    7.70
   3  -1 -19   26.90    6.60
   2  -1 -19   59.69    7.30
   1  -1 -19  722.63   26.30
   1  -1 -19  742.43   26.50
   0  -1 -19   15.20    5.00
   0  -1 -19   22.40    5.70
  -1  -1 -19  801.12   28.60
  -2  -1 -19   54.69    6.80
  -3  -1 -19   26.50    6.10
  -5  -1 -19    6.50   16.30
   7  -2 -19   -0.80    6.20
  -7   2  19    0.60    7.50
  -7   2  19   -6.60   11.20
  -7   2  19   -0.40    6.80
   6  -2 -19   49.99    8.60
  -6   2  19   57.79   13.90
  -6   2  19   30.70   10.80
   5  -2 -19   98.39   13.90
   5  -2 -19   83.89   11.60
  -5   2  19  108.99   15.80
  -5   2  19   94.89   12.30
   4  -2 -19  105.29   13.40
  -4   2  19  122.99   14.00
   3  -2 -19   92.29   10.80
   2  -2 -19   31.70    6.60
   2  -2 -19   29.70    6.30
   1  -2 -19  134.89   10.30
   1  -2 -19  140.79   10.60
   0  -2 -19  107.39    8.90
   0  -2 -19  128.19    9.40
  -1  -2 -19  140.19   10.20
  -2  -2 -19   22.10    5.70
   7  -3 -19   24.10    6.70
  -7   3  19   24.00   12.40
  -7   3  19   14.00    7.30
   6  -3 -19    5.40    7.20
  -6   3  19    8.50    9.00
  -6   3  19  -22.30   12.40
   5  -3 -19   -5.50    5.50
   5  -3 -19   15.00    7.20
   5  -3 -19    1.90    6.70
  -5   3  19    5.80   13.20
  -5   3  19   -7.00    8.10
   4  -3 -19  128.99   15.30
   4  -3 -19  113.99   14.30
   4  -3 -19  165.18   13.50
   4  -3 -19  140.19   12.70
   4  -3 -19  147.59   12.00
  -4   3  19  162.18   14.20
   3  -3 -19   40.30    7.60
  -3   3  19   48.20    8.70
   2  -3 -19   20.50    6.40
   2  -3 -19   18.20    6.50
   1  -3 -19   -1.20    5.60
   1  -3 -19   -0.70    5.80
   0  -3 -19    6.40    5.30
   0  -3 -19   20.20    6.30
  -1  -3 -19   -1.40    5.30
  -2  -3 -19   18.70    5.70
   7  -4 -19    2.20    5.20
   6  -4 -19   15.90    7.30
   6  -4 -19   26.80    6.60
  -6   4  19   12.70    8.30
  -6   4  19   38.20   14.90
   5  -4 -19   24.80    7.70
   5  -4 -19   28.50    7.00
   5  -4 -19   27.20   13.40
  -5   4  19   37.60   15.00
  -5   4  19   30.50    9.60
   4  -4 -19    9.30    8.40
   4  -4 -19   -8.30    7.00
   4  -4 -19    7.40    5.90
  -4   4  19    9.10    8.20
   3  -4 -19   97.49   12.90
  -3   4  19   96.79   13.50
   2  -4 -19   53.79    8.10
   2  -4 -19   78.79    9.80
  -2   4  19   66.39    9.60
   1  -4 -19  130.69   11.90
   1  -4 -19  145.09   12.30
   0  -4 -19    4.00    6.20
   0  -4 -19    3.10    6.70
  -1  -4 -19  140.49   11.50
  -2  -4 -19   81.59   10.70
  -7   5  19   55.09   12.80
   6  -5 -19   21.30    6.10
  -6   5  19   24.90    7.80
  -6   5  19    9.60   15.80
   5  -5 -19   16.70   10.30
   5  -5 -19   25.50    7.10
  -5   5  19   32.30    9.40
   4  -5 -19  115.79   14.30
   4  -5 -19  132.59   15.40
   4  -5 -19  114.79   12.50
  -4   5  19  124.89   14.90
   3  -5 -19   41.40    9.80
   3  -5 -19   43.10    8.80
   3  -5 -19   42.60    9.00
   3  -5 -19   41.60    7.30
  -3   5  19   47.50    9.70
   2  -5 -19   40.80    8.20
  -2   5  19   29.10    8.80
   1  -5 -19   79.19   10.40
   1  -5 -19   67.69    9.10
   0  -5 -19   12.00    7.40
   0  -5 -19    4.40    7.30
  -1  -5 -19   55.49    8.40
  -1  -5 -19   74.69    9.20
  -2  -5 -19   25.90    7.70
   6  -6 -19   40.00    6.50
  -6   6  19   40.50    7.80
  -6   6  19   43.00   14.80
   5  -6 -19    3.30    6.60
   5  -6 -19   -6.40    8.60
  -5   6  19   -2.00    7.00
   4  -6 -19   24.00    9.50
   4  -6 -19    4.70    7.10
  -4   6  19    8.30    8.00
   3  -6 -19    5.40    7.90
   3  -6 -19    3.10    7.40
   3  -6 -19   12.80    8.50
   3  -6 -19   16.60    6.80
   3  -6 -19   -3.00    9.30
  -3   6  19   13.10    8.80
   2  -6 -19  165.38   16.30
   2  -6 -19  179.68   15.80
   2  -6 -19  193.58   15.40
   2  -6 -19  169.18   13.80
   2  -6 -19  177.78   17.10
  -2   6  19  200.18   15.70
   1  -6 -19   54.09   10.00
   1  -6 -19   55.59    9.50
   1  -6 -19   38.20    9.80
  -1   6  19   60.09   10.90
   0  -6 -19  162.58   15.90
   0  -6 -19  153.68   15.40
  -1  -6 -19   62.79   10.30
  -1  -6 -19   52.79    9.80
  -2  -6 -19  184.58   22.30
   6  -7 -19   21.40    5.70
  -6   7  19   26.40    8.40
   5  -7 -19    8.80    6.70
  -5   7  19    7.30    6.90
   4  -7 -19   60.49   11.40
   4  -7 -19   66.69    9.20
  -4   7  19   56.99    9.50
   3  -7 -19   51.99   11.10
   3  -7 -19   64.59   10.10
   3  -7 -19   58.39    8.60
  -3   7  19   58.49   10.60
   2  -7 -19  201.08   19.10
   2  -7 -19  228.88   14.90
   2  -7 -19  215.48   18.40
   2  -7 -19  201.68   16.90
   2  -7 -19  198.48   17.70
  -2   7  19  224.78   17.70
   1  -7 -19   16.90   11.00
   1  -7 -19   23.10    9.50
   1  -7 -19   26.70    9.70
   1  -7 -19   43.30    9.80
  -1   7  19   34.50   10.90
   0  -7 -19    5.40    8.40
   0  -7 -19   10.00    8.70
   0  -7 -19    8.50   11.50
  -1  -7 -19   23.90    9.80
  -1  -7 -19   26.30    9.40
  -2  -7 -19  200.78   16.90
   5  -8 -19   19.20    6.20
   5  -8 -19   40.90    6.80
   4  -8 -19   -6.20    7.00
   4  -8 -19    3.80    7.00
  -4   8  19    4.80    6.70
   3  -8 -19    3.40    8.40
   3  -8 -19   16.30    7.90
   3  -8 -19    9.60    9.80
  -3   8  19   18.30    8.80
   2  -8 -19   63.19   11.60
   2  -8 -19   56.99   12.50
   2  -8 -19   50.79   10.60
  -2   8  19   50.29   10.90
   1  -8 -19  110.09   16.20
   1  -8 -19  103.09   15.80
   1  -8 -19   79.59   13.10
  -1   8  19   94.89   13.10
   0  -8 -19    4.70    9.30
   0  -8 -19    9.10   11.50
  -1  -8 -19  108.99   12.60
  -1  -8 -19   89.59   15.40
  -2  -8 -19   46.10   12.60
  -2  -8 -19   56.99   10.60
   4  -9 -19   40.60    6.70
   4  -9 -19   15.20    6.00
   3  -9 -19   25.20    7.20
   3  -9 -19   36.00    9.50
  -3   9  19   18.30    7.30
   2  -9 -19   15.80    9.40
   2  -9 -19    3.80    8.40
   2  -9 -19   11.90   10.20
  -2   9  19   10.80    8.50
   1  -9 -19    3.40    9.10
   1  -9 -19   13.20   10.60
   1  -9 -19    7.00    9.00
  -1   9  19   14.80    9.30
   0  -9 -19   30.50   10.60
   0  -9 -19   32.70   11.90
   0   9  19   26.00   10.50
  -1  -9 -19   14.50    9.70
  -1  -9 -19    4.40   11.60
  -2  -9 -19   -2.00    8.80
  -2  -9 -19    7.80   10.90
   3 -10 -19    2.60    7.10
   2 -10 -19   19.60    9.30
   2 -10 -19   19.00    8.00
   2 -10 -19   12.00    7.40
  -2  10  19    7.90    8.60
   1 -10 -19   39.20    8.30
   1 -10 -19   12.80    9.80
   1 -10 -19   29.10    8.80
  -1  10  19   26.80    8.20
   0 -10 -19   21.00    9.40
   0 -10 -19   17.60    8.20
   0  10  19   44.00    9.00
  -1 -10 -19   18.00    8.30
  -1 -10 -19   19.70   10.00
   1  10  19   17.00    8.70
  -2 -10 -19   13.10    9.20
  -2 -10 -19   38.70    8.40
   1 -11 -19    7.10    6.80
   0 -11 -19   -1.90    7.00
   0 -11 -19   -1.40    5.10
  -1 -11 -19   10.80    5.10
  -3 -10  20   56.39    9.80
  -3 -10  20   45.50    6.30
  -2 -10  20   22.30    9.70
  -1 -10  20    7.00   10.20
  -1 -10  20   22.30    7.80
   0 -10  20   11.20    8.10
   0 -10  20    6.60   10.40
   1 -10  20    9.10    5.00
   2 -10  20    4.30    4.70
   2 -10  20    7.00    4.70
   3 -10  20   38.40    5.40
  -4  -9  20    9.00    4.90
  -4  -9  20   20.00    8.50
  -3  -9  20   42.00    7.30
  -3  -9  20   42.30   11.40
  -2  -9  20    1.50   11.80
  -2  -9  20   11.30    6.80
  -2  -9  20    7.70    8.00
  -1  -9  20   41.60   14.40
  -1  -9  20   27.30    9.60
   0  -9  20   -1.10    9.70
   1  -9  20   11.50    8.70
   2  -9  20   -0.80    5.50
   2  -9  20    7.90    6.50
   3  -9  20   33.50    7.10
  -4   9 -20   14.30    9.50
   4  -9  20    4.50    5.40
  -5  -8  20    2.40    7.20
  -5  -8  20   -0.20    6.00
  -4  -8  20   19.30   10.40
  -3  -8  20   14.10   11.80
  -2  -8  20   80.19   13.70
  -2  -8  20   70.79   11.30
  -1  -8  20   60.69   12.80
  -1  -8  20   56.29   11.00
   0  -8  20    3.50    9.90
  -1   8 -20   62.89   10.10
   1  -8  20   60.49   12.20
   2  -8  20   65.09    9.30
   2  -8  20   53.99   10.00
   3  -8  20   15.80    8.40
   4  -8  20   -2.10    6.90
   5  -8  20   -0.50    5.20
  -6  -7  20   22.60    6.40
  -5  -7  20   11.90    9.70
  -4  -7  20   -4.20   10.40
  -3  -7  20   -1.10   10.40
  -2  -7  20   57.89   10.60
  -2  -7  20   67.29   13.00
  -1  -7  20   25.70    9.80
   0  -7  20   27.40    9.80
  -1   7 -20   27.50    8.70
   1  -7  20   19.50   10.00
  -2   7 -20   73.99   10.70
   2  -7  20   54.79   11.70
  -3   7 -20   19.20    8.80
   3  -7  20   16.30    9.20
   4  -7  20    5.30    8.40
   5  -7  20   25.90    6.80
  -6  -6  20   20.70    8.80
  -5  -6  20    4.80   11.90
  -4  -6  20   10.40   12.00
  -3  -6  20   69.99   14.20
  -2  -6  20  186.18   24.30
  -2  -6  20  187.58   15.90
  -1  -6  20    7.10    8.60
   0  -6  20   74.29   11.60
  -1   6 -20   -0.90    7.10
   1  -6  20   31.10    9.90
  -2   6 -20  206.78   15.50
   2  -6  20  182.08   18.10
  -3   6 -20   74.49   10.80
  -4   6 -20   31.20    9.70
   4  -6  20   19.50    8.80
  -5   6 -20   34.50   20.10
   5  -6  20    6.70    7.70
  -6   6 -20   17.20   11.20
  -6  -5  20    9.60   11.00
  -5  -5  20    8.30   11.30
  -4  -5  20   70.59   12.90
  -2  -5  20   80.69   12.10
  -1  -5  20   46.30   10.00
   0   5 -20    1.60    6.20
   0  -5  20  -13.60    7.60
  -1   5 -20   61.09    8.80
   1  -5  20   73.39   10.50
  -2   5 -20  146.49   14.00
   2  -5  20  117.59   15.20
  -3   5 -20   43.40   11.30
  -3   5 -20   56.99    9.90
  -4   5 -20  110.39   15.30
  -4   5 -20   69.89   19.30
   4  -5  20   71.09   10.00
  -5   5 -20  -10.30   17.20
   5  -5  20   -0.40    7.70
  -6   5 -20  -20.00   16.30
  -7   5 -20   47.70    9.70
  -7  -4  20   -6.90    8.10
  -6  -4  20   64.29   12.40
  -6  -4  20   44.60    8.10
  -5  -4  20   51.29   10.30
  -5  -4  20   39.10   11.40
  -4  -4  20   22.10   11.30
  -3  -4  20   33.30    8.30
  -2  -4  20   24.10    7.50
  -1  -4  20   52.29    9.00
   0   4 -20  135.49   12.50
   0  -4  20  173.38   14.00
  -1   4 -20   71.09    8.80
   1  -4  20   58.69    9.40
  -2   4 -20   40.30    8.50
   2  -4  20   46.90    9.00
  -3   4 -20   54.89   12.80
  -3   4 -20   51.59    9.30
   3  -4  20   42.80    9.00
  -4   4 -20   17.60    8.70
  -4   4 -20   44.70   16.90
  -5   4 -20   41.80   18.20
  -6   4 -20   65.69   19.70
  -7   4 -20    1.00   12.50
  -7  -3  20   11.90    5.80
  -7  -3  20   13.60    9.10
  -6  -3  20   -8.30    6.70
  -6  -3  20   11.20   11.30
  -5  -3  20   -1.70    9.60
  -5  -3  20    8.40    9.90
  -3  -3  20   24.30    7.70
  -2  -3  20  150.68   13.00
  -1  -3  20    5.40    6.60
   0   3 -20   51.29    7.20
   0  -3  20   38.50    8.20
  -1   3 -20   28.20    7.20
   1  -3  20   22.00    7.30
  -2   3 -20  185.28   13.90
   2  -3  20  186.68   13.70
  -3   3 -20   35.10    8.60
  -4   3 -20  171.08   14.40
  -5   3 -20    9.80   16.10
  -6   3 -20   -9.10   16.70
  -7   3 -20    2.90   15.80
   7   2 -20   47.00    7.50
  -7  -2  20   42.20    7.40
  -7  -2  20   40.00    7.90
  -7  -2  20   51.99   11.20
   6   2 -20  136.29   12.10
  -6  -2  20  102.19   14.10
   5   2 -20   15.20    7.10
   5   2 -20   10.20    8.30
  -5  -2  20   25.50   10.10
  -5  -2  20   -1.70   10.80
   4   2 -20   62.59   12.30
   4   2 -20   37.20    8.30
   4   2 -20   53.89    7.90
  -4  -2  20   48.70    9.70
  -3  -2  20   27.50    7.80
  -2  -2  20   67.29    8.80
   1   2 -20  178.08   10.50
  -1  -2  20  197.88   12.90
   0   2 -20  209.88   12.10
   0  -2  20  210.48   13.00
  -1   2 -20  235.28   13.20
   1  -2  20  225.68   13.30
  -2   2 -20   81.19   10.20
   2  -2  20   75.49    9.60
  -3   2 -20   21.90    6.90
  -4   2 -20   48.50    8.00
  -5   2 -20    2.10   14.50
  -6   2 -20  120.29   20.90
  -7   2 -20   75.29   17.60
   7   1 -20   55.59    7.30
  -7  -1  20   57.69    8.60
  -7  -1  20   51.29   11.80
  -7  -1  20   49.60    8.50
   6   1 -20   34.20    7.90
  -6  -1  20   18.30   10.10
  -6  -1  20   28.30   12.30
  -6  -1  20   50.59   10.30
   5   1 -20   40.80    9.50
   5   1 -20   50.29    8.60
   5   1 -20   50.69    9.00
  -5  -1  20   39.30   10.70
  -5  -1  20   44.10   12.70
   4   1 -20  100.09   11.10
   4   1 -20   88.19   13.10
  -4  -1  20   80.09   10.90
   3   1 -20  102.19   11.80
  -3  -1  20   74.79   11.30
  -2  -1  20   12.90    6.50
   1   1 -20  140.89    9.80
   1   1 -20  140.39    9.90
  -1  -1  20  153.28   11.60
   0   1 -20   13.90    5.20
   0  -1  20   13.30    5.00
  -1   1 -20  147.59   10.50
   1  -1  20  137.59    9.10
  -2   1 -20   16.80    6.00
  -3   1 -20  105.89   11.00
  -5   1 -20   32.90   16.50
  -6   1 -20   11.60   16.40
  -7   1 -20   56.29   16.80
   7   0 -20    7.30    5.70
  -7   0  20  -13.00    6.40
  -7   0  20    6.20   11.30
  -7   0  20   10.50    7.00
   6   0 -20   14.50    7.40
  -6   0  20   19.20   11.90
  -6   0  20   16.20    8.90
  -6   0  20   10.60   10.10
   5   0 -20   -0.20    7.00
   5   0 -20   -0.70    6.90
   5   0 -20   -1.40    6.80
  -5   0  20    9.40   11.30
  -5   0  20    1.30    9.30
   4   0 -20   35.40    9.90
   4   0 -20   39.60    8.20
  -4   0  20   37.30    8.50
   3   0 -20  143.29   13.40
   2   0 -20   21.70    6.40
  -2   0  20   30.30    6.90
   1   0 -20  101.89    8.60
   1   0 -20   85.69    9.40
  -1   0  20   83.79    9.20
   0   0 -20  183.68   11.00
   0   0  20  168.88   10.60
  -1   0 -20  106.99    9.30
   1   0  20  103.49    7.60
  -2   0 -20   11.40    5.30
  -3   0 -20   95.89    9.30
  -5   0 -20  -21.10   14.50
  -6   0 -20   29.30   17.00
  -7   0 -20   -0.80   14.10
   7  -1 -20   53.99    7.70
  -7   1  20   66.79   10.00
  -7   1  20   59.69   13.30
  -7   1  20   47.60    9.20
   6  -1 -20   57.49    9.00
  -6   1  20   29.10   12.70
  -6   1  20   41.50   11.20
   5  -1 -20   29.40    7.50
   5  -1 -20   49.30    8.90
  -5   1  20   41.80   13.00
  -5   1  20   19.10    9.20
   4  -1 -20   71.29    8.80
  -4   1  20   75.89   10.90
   3  -1 -20   94.79   10.80
   2  -1 -20   15.50    5.90
   1  -1 -20  147.09   10.20
   1  -1 -20  145.49   10.10
   0  -1 -20   16.70    4.80
   0  -1 -20   14.20    5.30
  -1  -1 -20  151.08   10.60
  -2  -1 -20   12.30    5.60
  -3  -1 -20   87.59   10.10
  -5  -1 -20   46.30   17.50
   7  -2 -20   49.10    7.70
  -7   2  20   52.39    8.40
  -7   2  20   42.40    8.40
  -7   2  20   40.80   13.30
   6  -2 -20  127.59   12.90
  -6   2  20  126.79   14.20
  -6   2  20  145.59   17.50
   5  -2 -20   14.20    7.10
   5  -2 -20   19.60    7.60
   5  -2 -20    8.00    6.70
  -5   2  20   15.80   13.00
  -5   2  20   25.60    9.50
   4  -2 -20   53.09    9.00
   4  -2 -20   53.39    8.40
   4  -2 -20   52.69    7.80
  -4   2  20   83.19   10.80
   3  -2 -20   30.20    7.30
  -3   2  20   42.60    8.80
   2  -2 -20   76.59    8.40
   2  -2 -20   87.09   11.10
   1  -2 -20  213.48   12.30
   1  -2 -20  194.38   11.90
   0  -2 -20  186.98   11.80
   0  -2 -20  205.88   11.30
  -1  -2 -20  194.48   11.70
  -2  -2 -20   76.59    8.80
  -3  -2 -20   24.60    6.10
   7  -3 -20   16.80    6.20
  -7   3  20    2.70   12.00
  -7   3  20   14.40    7.10
   6  -3 -20   12.80    7.40
  -6   3  20    9.00    8.90
  -6   3  20   -1.20   13.30
   5  -3 -20   10.60    6.20
   5  -3 -20   12.30    7.20
  -5   3  20    1.20   13.20
  -5   3  20   13.20    9.30
   4  -3 -20  162.28   16.00
   4  -3 -20  159.08   12.50
   4  -3 -20  163.78   15.50
   4  -3 -20  167.78   12.80
   4  -3 -20  178.18   14.00
  -4   3  20  158.08   14.50
   3  -3 -20   28.20    7.10
  -3   3  20   32.40    8.50
   2  -3 -20  163.78   12.10
   2  -3 -20  158.08   12.50
   1  -3 -20   -1.60    5.70
   1  -3 -20   15.30    6.20
   0  -3 -20   53.19    7.50
   0  -3 -20   55.19    7.20
  -1  -3 -20    1.70    5.60
  -2  -3 -20  160.88   11.70
   7  -4 -20    2.90    5.10
  -7   4  20    0.40   11.90
   6  -4 -20   58.59    7.70
   6  -4 -20   71.59    8.90
  -6   4  20   68.19   10.20
  -6   4  20   59.29   16.80
   5  -4 -20   37.60    7.50
   5  -4 -20   57.69    8.90
  -5   4  20   50.99   10.30
   4  -4 -20   27.10    7.00
   4  -4 -20   34.40    9.10
   4  -4 -20   16.90    9.20
   4  -4 -20   11.40    8.00
  -4   4  20   28.50    9.10
   3  -4 -20   45.60    8.60
   3  -4 -20   57.09    9.60
  -3   4  20   41.40    9.10
   2  -4 -20   33.30    8.80
   2  -4 -20   31.10    7.90
  -2   4  20   45.80    9.10
   1  -4 -20   69.69    8.50
   1  -4 -20   60.49    8.40
   0  -4 -20  141.09   12.40
   0  -4 -20  137.89   12.70
  -1  -4 -20   68.19    8.70
  -2  -4 -20   38.60    7.40
   6  -5 -20    2.80    5.70
  -6   5  20    7.80   15.30
  -6   5  20    2.50    7.20
   5  -5 -20    9.90    6.60
   5  -5 -20   12.70    9.70
  -5   5  20    1.00    8.10
   4  -5 -20   82.29   11.60
   4  -5 -20   66.59   11.50
  -4   5  20   57.79   10.40
   3  -5 -20   51.49    9.20
   3  -5 -20   61.59   10.10
   3  -5 -20   50.79    7.50
   3  -5 -20   63.79    9.30
  -3   5  20   61.59   10.20
   2  -5 -20  152.68   13.70
   2  -5 -20  135.69   15.40
  -2   5  20  100.29   13.40
   1  -5 -20   64.59    8.80
   1  -5 -20   51.39    9.80
  -1   5  20   65.29   10.50
   0  -5 -20   -3.90    7.50
   0  -5 -20   -5.10    7.10
  -1  -5 -20   54.19    8.60
  -1  -5 -20   61.99   14.60
  -2  -5 -20  121.69   12.60
   6  -6 -20   41.10    6.60
  -6   6  20   39.40   10.30
   5  -6 -20    7.70    7.70
   5  -6 -20    0.30    6.60
  -5   6  20   11.70    7.40
   4  -6 -20   25.10    7.60
   4  -6 -20   32.10   10.50
  -4   6  20   33.20    9.30
   3  -6 -20   85.49   10.80
   3  -6 -20  102.19   12.20
   3  -6 -20   82.89   11.90
   3  -6 -20   84.69   10.70
  -3   6  20   74.29   11.00
   2  -6 -20  167.18   17.00
   2  -6 -20  187.88   15.50
   2  -6 -20  194.38   17.30
   2  -6 -20  202.48   13.90
   2  -6 -20  191.98   16.90
  -2   6  20  190.98   16.40
   1  -6 -20   19.10    8.70
   1  -6 -20    8.80    7.80
   1  -6 -20    1.40    8.10
  -1   6  20    6.90    8.90
   0  -6 -20   81.59   11.10
   0  -6 -20   86.19   11.00
   0  -6 -20   89.09   11.70
  -1  -6 -20   10.40    8.60
  -1  -6 -20    2.40    7.60
  -1  -6 -20    2.90    8.20
   6  -7 -20    8.40    5.20
  -6   7  20    3.90    7.50
   5  -7 -20   19.20    6.90
   5  -7 -20    2.60    6.70
  -5   7  20    6.90    6.60
   4  -7 -20   -4.00    7.10
   4  -7 -20   -0.70    9.40
  -4   7  20   11.10    7.40
   3  -7 -20    8.10    8.80
   3  -7 -20   18.30    9.80
   3  -7 -20   24.10    7.60
  -3   7  20   -2.40    8.50
   2  -7 -20   78.29    9.30
   2  -7 -20   59.29   11.30
   2  -7 -20   61.29   12.10
   2  -7 -20   82.49   11.60
  -2   7  20   65.59   11.60
   1  -7 -20   37.70   10.80
   1  -7 -20   17.50    9.00
   1  -7 -20   21.60    9.60
   1  -7 -20   20.30    8.90
  -1   7  20   34.00   10.90
   0  -7 -20   43.00   12.40
   0  -7 -20   47.80   10.20
   0  -7 -20   37.90   10.00
  -1  -7 -20   43.60   10.90
  -1  -7 -20   34.20    9.10
  -2  -7 -20   76.79   10.50
   5  -8 -20    3.30    5.40
   5  -8 -20    3.40    5.80
   4  -8 -20    8.60    7.30
   4  -8 -20   -4.60    6.90
  -4   8  20    3.10    6.50
   3  -8 -20   18.30    8.60
   3  -8 -20   36.10   10.30
   3  -8 -20   14.10    8.00
  -3   8  20   13.50    8.40
   2  -8 -20   72.59   11.80
   2  -8 -20   71.39   11.50
   2  -8 -20   57.29   12.10
  -2   8  20   82.69   11.50
   1  -8 -20   63.59   12.00
   1  -8 -20   88.99   12.10
   1  -8 -20   70.19   11.20
  -1   8  20   79.99   12.50
   0  -8 -20   28.00   10.10
   0  -8 -20   19.40   11.50
  -1  -8 -20   60.39   13.80
  -1  -8 -20   65.19   11.10
  -2  -8 -20   84.29   11.60
   4  -9 -20   12.50    5.90
   4  -9 -20    4.00    6.20
   3  -9 -20   35.10    7.10
   3  -9 -20   35.40    9.60
  -3   9  20   42.70    8.00
   2  -9 -20    5.10    8.90
   2  -9 -20   18.10    9.00
   2  -9 -20    8.70   10.10
  -2   9  20    4.80    8.10
   1  -9 -20   52.79   10.10
   1  -9 -20   24.80    9.90
   1  -9 -20   23.30   10.60
  -1   9  20   42.20   10.10
   0  -9 -20   11.70    9.90
   0  -9 -20   -3.20   10.50
   0   9  20   -2.40    9.60
  -1  -9 -20   26.60   11.40
  -1  -9 -20   35.20   10.00
  -2  -9 -20  -10.80   10.10
  -2  -9 -20   11.20    9.20
   3 -10 -20   38.10    7.70
   2 -10 -20    3.30    6.80
   2 -10 -20    2.70    7.30
   1 -10 -20   25.20    9.50
   1 -10 -20   20.70    8.00
  -1  10  20   13.10    7.50
   0 -10 -20    9.20    7.60
   0 -10 -20    9.00    8.90
   0  10  20   11.30    8.20
  -1 -10 -20   14.90    9.20
  -1 -10 -20   15.50    7.80
   1  10  20   28.30    8.90
  -2 -10 -20    0.90    8.30
  -2 -10 -20   -1.80    6.90
  -2 -10  21   14.00    8.50
  -1 -10  21   32.20    8.00
  -1 -10  21   19.80    9.80
   0 -10  21   -0.50    7.50
   0 -10  21    6.90    9.80
   1 -10  21   16.20    6.00
   2 -10  21   15.30    4.80
   2 -10  21   16.90    4.90
  -4  -9  21   22.90    4.90
  -4  -9  21   30.00    8.70
  -3  -9  21   12.90    6.10
  -3  -9  21   10.50   10.50
  -2  -9  21    1.80    6.40
  -2  -9  21    9.00   12.20
  -2  -9  21   19.60    8.30
  -1  -9  21   -0.90    8.40
  -1  -9  21    6.00   13.40
   0  -9  21    9.50    9.60
   1  -9  21   -0.80    6.90
   2  -9  21    7.00    5.30
   2  -9  21    7.90    6.60
   3  -9  21   -4.60    6.00
  -4   9 -21   14.60   10.80
   4  -9  21   21.40    5.20
  -5  -8  21   64.39    7.40
  -5  -8  21   69.79    8.60
  -4  -8  21   11.90   10.50
  -3  -8  21   17.80   11.80
  -2  -8  21    2.30   12.00
  -2  -8  21   11.90    8.90
  -1  -8  21   28.10   14.10
  -1  -8  21   54.79   10.90
   0  -8  21   -2.90    9.70
  -1   8 -21   44.40    9.20
   1  -8  21   22.90   10.80
   2  -8  21    7.70    7.00
   2  -8  21    0.10    8.00
   3  -8  21   10.20    8.00
   4  -8  21   21.30    7.20
   5  -8  21   75.79    8.40
  -5  -7  21    9.00    9.80
  -4  -7  21   20.60   11.50
  -3  -7  21   25.40   11.40
  -2  -7  21    9.80    9.30
  -2  -7  21   29.30   12.20
  -1  -7  21   95.29   12.80
   0  -7  21   11.50    9.50
  -1   7 -21  114.19   14.20
   1  -7  21   97.19   12.90
  -2   7 -21   16.90    8.80
   2  -7  21    1.70    9.70
  -3   7 -21   29.40    9.00
   3  -7  21   30.80    9.70
   4  -7  21   11.40    8.50
   5  -7  21    4.70    5.90
  -6  -6  21   -0.40    7.70
  -5  -6  21   25.00   12.30
  -4  -6  21   32.70   12.80
  -3  -6  21    5.60   12.20
  -2  -6  21  123.29   16.50
  -2  -6  21  119.79   15.10
  -1  -6  21   55.99   10.80
   0  -6  21    0.20    8.90
  -1   6 -21   74.69   10.40
   1  -6  21   56.69   11.10
  -2   6 -21  135.99   14.30
   2  -6  21  119.99   16.20
  -3   6 -21   37.80    9.50
  -4   6 -21   35.50   13.70
   4  -6  21   42.50    9.40
  -5   6 -21   14.10   19.10
   5  -6  21    6.30    7.30
  -6   6 -21    9.50   10.20
  -6  -5  21   29.10   11.60
  -5  -5  21   39.80   12.30
  -4  -5  21   -5.80   10.80
  -3  -5  21   32.10    9.50
  -3  -5  21   13.40   11.90
  -2  -5  21  165.38   15.80
  -1  -5  21  173.38   16.10
   0   5 -21   12.50    7.30
   0  -5  21   20.70    8.90
  -1   5 -21  158.98   14.00
   1  -5  21  172.98   16.40
  -2   5 -21  185.18   16.90
  -2   5 -21  181.18   15.20
  -3   5 -21   38.40   11.40
  -3   5 -21   31.50    9.20
  -4   5 -21    5.10   17.20
  -4   5 -21   -7.60    8.50
   4  -5  21   -5.50    7.60
  -5   5 -21   44.30   20.00
   5  -5  21   30.60    8.20
  -6   5 -21   29.10   16.90
  -7  -4  21    1.50    7.80
  -6  -4  21   15.80    6.70
  -6  -4  21   23.60   11.40
  -5  -4  21   37.80   11.40
  -4  -4  21   26.40   11.40
  -3  -4  21   24.70    8.90
  -2  -4  21   65.79    9.40
  -1  -4  21   45.90    8.70
   0   4 -21    6.00    6.50
   0  -4  21   -3.20    7.80
  -1   4 -21   39.70    8.20
   1  -4  21   39.30    9.10
  -2   4 -21   99.09   13.70
   2  -4  21  106.59   13.50
  -3   4 -21   -1.00   10.20
  -3   4 -21   43.60    9.60
  -4   4 -21   40.00    9.10
  -4   4 -21   40.80   17.10
  -5   4 -21   16.40   16.70
  -6   4 -21   40.90   18.90
  -7   4 -21   15.60   11.20
  -7  -3  21   13.30    9.00
  -6  -3  21   23.10    7.60
  -6  -3  21   -0.90   11.10
  -5  -3  21   47.60   11.90
  -5  -3  21   42.40   11.40
   4   3 -21  114.89   12.50
  -4  -3  21  138.49   21.10
  -3  -3  21   37.60    8.30
  -2  -3  21   14.40    7.40
  -1  -3  21  208.48   14.20
   0   3 -21  260.67   14.30
   0  -3  21  256.07   16.40
  -1   3 -21  277.17   15.70
   1  -3  21  282.67   16.40
  -2   3 -21   22.40    7.90
   2  -3  21   15.00    7.30
  -3   3 -21   43.90    8.80
  -4   3 -21  114.79   13.30
  -5   3 -21   48.60   17.40
  -6   3 -21   40.50   18.90
  -7   3 -21   21.60   15.90
   7   2 -21   14.60    5.80
  -7  -2  21    8.90    5.80
  -7  -2  21   15.60   10.10
   6   2 -21    7.60    6.90
  -6  -2  21    2.30    6.50
  -6  -2  21   -7.40   10.50
   5   2 -21   25.30    8.00
  -5  -2  21   21.10   10.30
  -5  -2  21   23.60   11.80
   4   2 -21   40.40    9.20
   4   2 -21   26.50    8.20
   4   2 -21   22.00    7.30
  -4  -2  21   29.80    9.00
  -3  -2  21   79.69    9.90
  -2  -2  21   25.60    7.20
   1   2 -21  108.89    9.10
  -1  -2  21  120.59   11.50
   0   2 -21    2.40    5.00
   0  -2  21   -1.80    5.60
  -1   2 -21  123.59   11.00
   1  -2  21  120.19   11.50
  -2   2 -21   18.60    6.70
  -3   2 -21   91.89   11.20
  -4   2 -21   20.20    7.30
  -5   2 -21   19.90   15.00
  -6   2 -21    7.00   16.90
  -7   2 -21   30.80   15.90
   7   1 -21   47.80    7.10
  -7  -1  21   48.10    8.10
  -7  -1  21   68.59   11.80
  -7  -1  21   44.50    7.80
   6   1 -21    2.10    6.50
  -6  -1  21    5.80   11.70
  -6  -1  21   -1.00    8.30
   5   1 -21   18.00    8.60
   5   1 -21   23.20    7.70
   5   1 -21    2.70    7.30
  -5  -1  21    1.80   11.70
  -5  -1  21    4.00    9.40
   4   1 -21    8.10    6.40
   4   1 -21   23.80   11.00
   4   1 -21   21.40    8.00
   4   1 -21   16.20    8.10
  -4  -1  21   -2.00    7.90
   3   1 -21   11.10    6.90
  -3  -1  21   10.80    7.10
   2   1 -21    8.60    6.20
  -2  -1  21    9.10    6.50
   1   1 -21   92.49    9.50
   1   1 -21   87.89    9.00
  -1  -1  21   90.89    9.90
   0   1 -21  442.26   18.00
   0  -1  21  421.36   17.90
  -1   1 -21  105.69    9.80
   1  -1  21   66.39    7.70
  -2   1 -21   16.30    6.20
  -3   1 -21   25.00    6.60
  -4   1 -21   17.60    8.00
  -4   1 -21   17.60    9.70
  -5   1 -21   12.50   15.30
  -6   1 -21    8.90   16.40
  -7   1 -21   54.39   16.30
   7   0 -21   19.20    6.30
  -7   0  21    6.20    5.60
  -7   0  21   12.40    6.60
  -7   0  21   22.40   11.60
   6   0 -21   39.30    8.40
  -6   0  21   67.79   14.10
  -6   0  21   43.40   10.70
  -6   0  21   44.30    9.90
   5   0 -21   17.00    7.30
   5   0 -21    3.90    7.40
   5   0 -21   11.50    7.40
  -5   0  21   12.10   11.90
  -5   0  21    6.30   10.00
   4   0 -21  350.66   20.10
   4   0 -21  368.36   17.40
  -4   0  21  380.56   20.00
   3   0 -21   30.20    7.50
   2   0 -21   62.79    7.90
   1   0 -21  260.47   12.90
   1   0 -21  251.07   13.50
  -1   0  21  262.37   13.90
   0   0 -21   -8.70    5.10
   0   0  21    3.90    4.80
  -1   0 -21  279.57   13.90
  -2   0 -21   52.09    7.00
  -3   0 -21   12.40    5.90
  -5   0 -21    5.80   15.90
  -6   0 -21   54.79   17.40
  -7   0 -21   14.20   14.10
   7  -1 -21   67.19    9.10
  -7   1  21   68.29    8.90
  -7   1  21   45.30    8.60
  -7   1  21   67.99   14.00
   6  -1 -21   -9.40    6.80
  -6   1  21    0.40    9.50
  -6   1  21   -2.60   12.10
   5  -1 -21   12.90    7.80
   5  -1 -21   19.80    7.30
   5  -1 -21   23.40    8.20
  -5   1  21   10.30    9.10
  -5   1  21   -2.10   12.50
   4  -1 -21    5.70    6.30
   4  -1 -21   20.00    7.60
   4  -1 -21   19.30    7.60
  -4   1  21   10.60    8.20
   3  -1 -21   13.70    6.40
  -3   1  21   29.00    8.20
   2  -1 -21    8.80    5.50
   1  -1 -21  100.29    9.90
   1  -1 -21   93.49    9.30
   0  -1 -21  434.16   18.10
  -1  -1 -21   82.79    9.30
  -2  -1 -21   15.40    6.10
  -3  -1 -21   16.40    6.40
  -5  -1 -21    6.90   15.90
   7  -2 -21   17.60    6.40
  -7   2  21   26.80    7.30
  -7   2  21   32.30   13.00
  -7   2  21   20.40    7.00
   6  -2 -21    5.20    7.10
  -6   2  21    6.60   13.20
  -6   2  21    5.90    9.20
   5  -2 -21   22.30    7.00
   5  -2 -21   28.10   10.70
   5  -2 -21   32.00    8.10
  -5   2  21   21.70   13.90
  -5   2  21   32.60    9.60
   4  -2 -21   33.00    8.10
   4  -2 -21   27.10    7.20
   4  -2 -21   34.00    6.90
   4  -2 -21   45.70    8.60
  -4   2  21   28.00    9.30
   3  -2 -21   77.39    9.20
  -3   2  21   67.79   10.20
   2  -2 -21   15.00    6.50
   2  -2 -21   19.90    6.90
   1  -2 -21  113.09   10.90
   1  -2 -21  123.69   10.20
   0  -2 -21   -0.30    4.90
   0  -2 -21   -0.20    5.50
  -1  -2 -21  125.19   10.30
  -2  -2 -21   28.30    6.30
  -3  -2 -21   78.99    9.90
   7  -3 -21    9.00    5.60
  -7   3  21    6.70    5.90
  -7   3  21    4.20    6.00
  -7   3  21   10.50   12.60
   6  -3 -21   34.60    7.90
  -6   3  21   37.10   15.00
  -6   3  21   26.90    9.60
   5  -3 -21   46.60    8.40
   5  -3 -21   53.89    7.70
  -5   3  21   50.99   16.70
  -5   3  21   43.30   10.60
   4  -3 -21  136.69   12.70
   4  -3 -21  131.09   14.70
   4  -3 -21  117.39   11.20
   4  -3 -21   98.79   14.10
   4  -3 -21  124.29   13.90
  -4   3  21  133.69   14.90
   3  -3 -21   48.20    7.80
  -3   3  21   41.70    9.40
   2  -3 -21   17.70    7.40
   2  -3 -21   14.60    6.60
  -2   3  21    9.10    7.50
   1  -3 -21  253.87   14.70
   1  -3 -21  243.88   14.90
   0  -3 -21  274.37   14.30
   0  -3 -21  201.58   13.80
  -1  -3 -21  249.48   13.80
  -2  -3 -21   12.20    6.10
   7  -4 -21   22.40    5.70
  -7   4  21   12.60   10.60
   6  -4 -21   19.50    6.40
   6  -4 -21   29.20    7.20
  -6   4  21    3.60   15.70
  -6   4  21   22.70    8.50
   5  -4 -21   25.20    6.70
   5  -4 -21   23.80    7.70
  -5   4  21   16.70    8.90
   4  -4 -21   29.70    9.50
   4  -4 -21   29.50    9.40
   4  -4 -21   43.40    9.10
   4  -4 -21   23.90    6.90
  -4   4  21   31.60    9.10
   3  -4 -21   25.10    8.60
   3  -4 -21   24.10    7.90
   3  -4 -21   32.50    9.60
   3  -4 -21   20.40    6.30
  -3   4  21   27.20    8.70
   2  -4 -21   93.39   12.90
   2  -4 -21   84.89   10.20
  -2   4  21   87.39   13.10
   1  -4 -21   58.29    8.40
   1  -4 -21   44.80    8.00
  -1   4  21   43.20    9.50
   0  -4 -21    4.20    6.30
   0  -4 -21    6.40    7.20
  -1  -4 -21   51.69    8.40
  -2  -4 -21   96.99   11.60
   6  -5 -21   32.10    6.50
  -6   5  21   16.10    7.50
  -6   5  21   33.00   15.80
   5  -5 -21   28.50    7.10
  -5   5  21   27.80    8.90
   4  -5 -21    2.10    8.20
   4  -5 -21    1.10    8.90
   4  -5 -21   -2.90    6.40
  -4   5  21   -2.70    7.90
   3  -5 -21   43.60    9.70
   3  -5 -21   33.70    7.20
   3  -5 -21   33.30    8.70
   3  -5 -21   24.90    8.40
  -3   5  21   34.80    9.00
   2  -5 -21  164.38   12.50
   2  -5 -21  178.58   15.30
   2  -5 -21  171.28   15.00
   2  -5 -21  181.88   16.30
  -2   5  21  160.98   15.30
   1  -5 -21  144.29   14.20
   1  -5 -21  138.19   14.50
  -1   5  21  163.18   14.90
   0  -5 -21   21.20    7.70
   0  -5 -21   17.80    7.90
  -1  -5 -21  172.78   13.50
  -2  -5 -21  168.88   14.10
   6  -6 -21   10.10    5.60
  -6   6  21    3.40    8.80
   5  -6 -21   -2.30    7.30
   5  -6 -21   -3.40    6.30
  -5   6  21    6.00    7.20
   4  -6 -21   36.60    8.30
   4  -6 -21   47.20   11.30
  -4   6  21   26.90    9.00
   3  -6 -21   29.60    9.00
   3  -6 -21   19.00    7.30
   3  -6 -21   47.20   10.30
  -3   6  21   44.40   10.10
   2  -6 -21  131.59   15.20
   2  -6 -21  112.89   15.70
   2  -6 -21  129.29   15.30
   2  -6 -21  124.39   15.60
   2  -6 -21  120.89   12.60
  -2   6  21  135.99   15.20
   1  -6 -21   64.89   10.00
   1  -6 -21   53.29   10.10
   1  -6 -21   75.99   10.80
  -1   6  21   49.60   10.80
   0  -6 -21   -4.00    8.10
   0  -6 -21    0.50    8.90
   0  -6 -21   -5.10    7.90
  -1  -6 -21   67.99   10.60
  -1  -6 -21   55.39    9.60
   5  -7 -21    5.90    6.40
   5  -7 -21    6.90    6.50
  -5   7  21    7.30    6.50
   4  -7 -21    1.80    7.40
   4  -7 -21   12.30    9.80
  -4   7  21   11.20    7.40
   3  -7 -21   17.80   10.00
   3  -7 -21   32.20    9.30
   3  -7 -21   25.00    8.00
  -3   7  21   11.10    8.60
   2  -7 -21   26.40    9.20
   2  -7 -21   21.80   10.60
   2  -7 -21   37.00   10.00
   2  -7 -21    9.50    7.10
  -2   7  21   16.90    9.40
   1  -7 -21   76.99   12.30
   1  -7 -21  120.69   16.30
   1  -7 -21   94.39   14.30
   1  -7 -21  102.09   12.00
  -1   7  21  118.19   14.40
   0  -7 -21   32.50    9.70
   0  -7 -21   22.10    9.00
  -1  -7 -21   94.89   11.40
  -2  -7 -21   20.80    8.80
   5  -8 -21   67.99    9.70
   4  -8 -21   10.10    7.00
   4  -8 -21   24.70    7.10
  -4   8  21   12.70    6.70
   3  -8 -21    0.10    8.20
   3  -8 -21   -8.70    7.10
   3  -8 -21    8.30    9.20
  -3   8  21    8.00    7.80
   2  -8 -21   10.80    9.00
   2  -8 -21    4.90    9.00
   2  -8 -21   -2.50   10.00
  -2   8  21   -8.90    8.40
   1  -8 -21   46.40   10.30
   1  -8 -21   33.30    9.90
   1  -8 -21   13.40   10.40
  -1   8  21   59.29   11.40
   0  -8 -21    6.60   10.70
   0  -8 -21    8.30    9.40
  -1  -8 -21   59.29   11.00
  -2  -8 -21   17.50    9.40
   4  -9 -21   24.80    7.00
   4  -9 -21   23.20    6.10
   3  -9 -21   -1.30    8.70
   3  -9 -21  -10.50    7.70
   3  -9 -21   14.20    7.20
  -3   9  21   -1.50    6.50
   2  -9 -21   13.80    8.40
   2  -9 -21   12.50    8.70
   2  -9 -21   10.90    9.40
  -2   9  21    7.40    8.00
   1  -9 -21    3.50    9.40
   1  -9 -21   -5.40    8.00
   1  -9 -21   14.40   10.20
  -1   9  21    7.60    8.70
   0  -9 -21    2.10    9.60
   0  -9 -21    1.00    8.90
   0   9  21   11.90    9.90
  -1  -9 -21   11.10    9.00
  -1  -9 -21   13.00   10.20
  -2  -9 -21    0.20    8.40
   2 -10 -21   20.30    6.70
   2 -10 -21   15.50    7.80
   1 -10 -21   22.30    7.40
   1 -10 -21   29.30    8.90
  -1  10  21   28.90    7.70
   0 -10 -21   15.10    7.70
   0 -10 -21   11.40    8.70
   0  10  21    7.30    7.90
  -1 -10 -21   19.60    8.50
  -1 -10 -21   18.70    7.40
   1  10  21   14.60    8.30
  -2 -10 -21   19.60    7.20
  -2 -10  22   20.70    9.20
  -2 -10  22   23.50    8.80
  -1 -10  22   -5.10    8.90
  -1 -10  22    3.50    7.00
   0 -10  22    5.60    7.30
   1 -10  22    7.30    5.50
   2 -10  22   23.30    4.80
   2 -10  22    9.70    4.30
  -4  -9  22   34.20    5.00
  -4  -9  22   48.00    8.90
  -3  -9  22    8.80    5.90
  -3  -9  22   -1.20    9.40
  -2  -9  22   24.50    6.90
  -2  -9  22   21.20    8.30
  -2  -9  22   12.40   12.10
  -1  -9  22   45.80   14.10
  -1  -9  22   38.40    9.90
   0  -9  22   33.00   10.40
   1  -9  22    4.90    5.70
   2  -9  22   25.80    6.90
   2  -9  22   11.80    5.30
   3  -9  22    0.50    5.70
   4  -9  22   49.50    7.20
  -5  -8  22   61.99    8.10
  -5  -8  22   41.60    5.50
  -4  -8  22   40.00   11.10
  -3  -8  22    4.50   11.70
  -2  -8  22   67.29   11.00
  -2  -8  22   83.59   14.70
  -1  -8  22    6.60    9.60
   0  -8  22   72.89   12.30
   1  -8  22    5.30   10.30
   2  -8  22   95.29   13.10
   2  -8  22   53.79    9.20
   3  -8  22    0.40    7.70
   4  -8  22   35.70    7.30
   5  -8  22   50.99    6.20
  -5  -7  22   36.20   10.80
  -4  -7  22   -4.00   10.90
  -3  -7  22   39.30   12.70
  -2  -7  22   24.00   12.60
  -2  -7  22   26.30   10.00
  -1  -7  22  114.79   16.00
   0  -7  22   48.40   11.10
  -1   7 -22  104.59   14.10
   1  -7  22  101.79   13.10
  -2   7 -22   57.69    9.90
   2  -7  22   25.90   10.70
   3  -7  22   19.70    9.30
   4  -7  22   -6.80    7.70
   5  -7  22   33.10    6.40
  -6  -6  22    1.60    7.50
  -5  -6  22    4.30   11.60
  -4  -6  22   35.70   13.20
  -3  -6  22   19.90   12.70
  -3  -6  22   11.50    8.70
  -2  -6  22   86.19   11.70
  -1  -6  22   44.20   10.40
   0  -6  22  -10.20    8.70
  -1   6 -22   31.20    8.70
   1  -6  22   21.30    9.90
  -2   6 -22   79.99   10.90
   2  -6  22   92.69   12.80
  -3   6 -22   -8.00    8.50
   4  -6  22   14.90    8.70
  -5   6 -22    7.00   19.00
   5  -6  22    8.50    7.20
  -6   6 -22   11.00    9.50
  -6  -5  22   11.00   11.10
  -5  -5  22   36.40   12.40
  -4  -5  22   69.39   13.50
  -3  -5  22   73.09   14.00
  -3  -5  22   80.19   11.30
  -2  -5  22   58.99   10.80
  -1  -5  22   70.59   10.30
  -1  -5  22   72.69   11.00
   0   5 -22   25.70    8.00
   0  -5  22   26.90    9.80
  -1   5 -22   67.99   10.10
   1  -5  22   73.49   11.30
   1  -5  22   77.09   15.80
  -2   5 -22   50.69    9.80
  -2   5 -22   49.80   11.30
  -3   5 -22   65.69   12.30
  -3   5 -22   82.39   11.30
  -4   5 -22   66.79   10.40
  -4   5 -22   67.09   19.40
   4  -5  22   61.39    9.40
  -5   5 -22   17.70   19.10
   5  -5  22   13.60    7.70
  -6   5 -22    7.40   14.90
  -7  -4  22   16.20    7.80
  -6  -4  22   27.00   11.90
  -6  -4  22   12.80    6.20
  -5  -4  22   47.20   12.10
  -4  -4  22  157.18   23.00
  -3  -4  22   21.70    9.00
  -2  -4  22   99.59   13.20
  -1  -4  22  193.18   15.30
   0   4 -22  163.48   12.80
   0  -4  22  146.89   15.30
  -1   4 -22  206.38   14.80
   1  -4  22  209.98   16.10
  -2   4 -22  114.29   13.50
   2  -4  22   96.79   13.70
  -3   4 -22   27.60    9.00
  -3   4 -22   10.00   10.70
  -4   4 -22  199.48   15.70
  -4   4 -22  181.18   27.70
  -5   4 -22   19.30   17.30
  -6   4 -22   37.80   18.80
  -7   4 -22   12.10   10.90
  -7  -3  22   36.40    9.50
  -6  -3  22   -4.40   11.60
  -6  -3  22    0.70    6.60
  -5  -3  22   67.39   12.90
  -5  -3  22   47.60   11.40
   4   3 -22   87.59   11.90
  -4  -3  22  103.99   14.10
  -3  -3  22   39.20    9.20
  -2  -3  22   33.50    8.50
  -1  -3  22   58.59    8.60
   0   3 -22   20.50    6.40
   0  -3  22   24.80    7.80
  -1   3 -22   71.09    8.60
   1  -3  22   76.09    9.50
  -2   3 -22   27.10    8.00
   2  -3  22   53.39    8.50
  -3   3 -22   64.39    9.40
  -3   3 -22   59.29   11.80
  -4   3 -22   96.69   20.00
  -4   3 -22  132.49   13.80
  -5   3 -22   74.89   19.50
  -6   3 -22   17.90   18.10
  -7   3 -22   42.90   15.60
   7   2 -22    8.90    5.30
  -7  -2  22    8.30    5.50
  -7  -2  22    9.80    9.90
   6   2 -22   20.30    7.10
  -6  -2  22   10.70    8.20
  -6  -2  22   15.10   11.80
   5   2 -22   67.09    9.40
  -5  -2  22   60.89   11.70
  -5  -2  22   64.99   13.70
   4   2 -22    7.80    7.40
   4   2 -22   16.10    8.30
   4   2 -22   12.80    7.80
  -4  -2  22    1.40    8.10
  -3  -2  22    9.60    7.50
  -2  -2  22   20.00    7.10
   1   2 -22  326.47   15.80
  -1  -2  22  313.77   16.30
   0   2 -22   -4.30    5.20
   0  -2  22   17.50    6.10
  -1   2 -22  359.36   17.60
   1  -2  22  392.76   17.20
  -2   2 -22    7.80    6.90
  -3   2 -22   40.70    8.20
  -4   2 -22   22.10   10.60
  -4   2 -22    6.20    7.10
  -5   2 -22   48.30   17.50
  -6   2 -22    3.90   16.80
  -7   2 -22    1.40   14.70
   7   1 -22   10.60    5.80
  -7  -1  22   39.10   10.90
  -7  -1  22   13.90    6.20
   6   1 -22   15.50    7.30
  -6  -1  22   -5.30    6.50
  -6  -1  22    3.20   12.30
   5   1 -22   57.39    8.70
  -5  -1  22   44.00   13.40
  -5  -1  22   64.19   11.60
   4   1 -22   90.99   10.90
   4   1 -22  114.39   14.30
   4   1 -22   85.89   10.30
  -4  -1  22   82.29   11.50
   3   1 -22  253.17   16.10
   2   1 -22   18.40    6.50
  -2  -1  22   17.30    7.00
   1   1 -22   -2.50    4.90
   1   1 -22   -8.70    4.90
  -1  -1  22   -1.60    5.80
   0   1 -22   -3.40    4.80
   0  -1  22   -3.10    5.20
  -1   1 -22    3.40    5.60
   1  -1  22   -7.90    4.30
  -2   1 -22   17.90    6.70
  -3   1 -22  221.68   13.60
  -4   1 -22   89.39   12.00
  -4   1 -22   83.59    9.50
  -5   1 -22   35.20   16.80
  -6   1 -22   28.80   17.10
  -7   1 -22    8.10   14.40
   7   0 -22   32.00    6.70
  -7   0  22   26.30    7.60
  -7   0  22   32.60    6.90
  -7   0  22   48.20   12.60
   6   0 -22   -1.30    6.80
  -6   0  22   15.20    8.60
  -6   0  22    8.60   13.10
  -6   0  22    5.40   12.90
   5   0 -22    5.80    6.90
   5   0 -22   12.10    7.40
   5   0 -22    0.50    7.80
  -5   0  22   14.20   10.20
  -5   0  22    2.20   12.10
   4   0 -22    1.60    7.10
   4   0 -22   -3.00    5.70
   4   0 -22   -7.30    6.80
  -4   0  22    2.80    7.40
   3   0 -22    6.90    6.80
  -3   0  22    6.70    7.40
   2   0 -22  123.59   11.30
   1   0 -22  662.93   25.00
   1   0 -22  673.93   25.00
  -1   0  22  679.43   25.70
   0   0 -22    8.50    5.80
   0   0  22   15.10    5.40
  -1   0 -22  680.63   25.70
  -2   0 -22   86.59    9.70
  -3   0 -22    1.10    5.60
  -5   0 -22   -4.70   15.40
  -6   0 -22   17.10   16.10
  -7   0 -22   32.40   14.20
   7  -1 -22   10.10    6.10
  -7   1  22    4.90    6.40
  -7   1  22   14.70   12.90
  -7   1  22    9.80    6.20
   6  -1 -22   12.30    7.50
  -6   1  22   23.90   13.50
  -6   1  22   26.10   10.00
   5  -1 -22   59.49    8.60
   5  -1 -22   63.29    9.90
  -5   1  22   45.90   10.90
  -5   1  22   64.29   14.50
   4  -1 -22   69.59    8.50
   4  -1 -22   75.79    9.70
   4  -1 -22   89.29   10.30
   4  -1 -22   81.99    9.90
  -4   1  22  103.89   14.20
   3  -1 -22  200.88   13.40
  -3   1  22  181.18   15.10
   2  -1 -22   22.20    6.10
   1  -1 -22   -4.40    5.10
   1  -1 -22   -5.10    5.20
   0  -1 -22   -0.70    5.20
  -1  -1 -22   -5.50    5.60
  -2  -1 -22   26.90    6.60
  -3  -1 -22  198.58   13.20
  -5  -1 -22   52.89   18.00
   7  -2 -22   21.00    6.30
  -7   2  22   25.70   12.90
  -7   2  22   17.60    6.80
  -7   2  22   22.40    7.00
   6  -2 -22   13.00    7.50
  -6   2  22   19.60   14.20
  -6   2  22   44.50   10.60
   5  -2 -22   51.79    7.90
   5  -2 -22   60.79    8.80
  -5   2  22   66.89   11.10
  -5   2  22   50.59   14.50
   4  -2 -22   16.90    6.80
   4  -2 -22    3.70    7.20
   4  -2 -22   17.30    6.70
   4  -2 -22   10.30    7.50
  -4   2  22    4.90    8.20
   3  -2 -22   29.50    7.90
  -3   2  22   31.80    8.80
   2  -2 -22   17.80    6.60
   2  -2 -22   23.60    7.10
   1  -2 -22  377.46   17.00
   1  -2 -22  337.77   16.40
   0  -2 -22  -15.90    5.20
   0  -2 -22   -2.50    5.10
  -1  -2 -22  286.27   14.60
  -2  -2 -22   25.00    6.40
  -3  -2 -22   18.50    6.20
   7  -3 -22   45.60    6.70
  -7   3  22   36.10   12.00
  -7   3  22   40.60    6.70
   6  -3 -22   10.20    7.10
  -6   3  22   14.90    8.80
  -6   3  22   -6.10   15.20
   5  -3 -22   61.89    9.00
   5  -3 -22   87.59   12.80
  -5   3  22   75.49   11.40
   4  -3 -22   97.79   11.50
   4  -3 -22  108.69   11.30
   4  -3 -22  113.19   12.20
   4  -3 -22  103.49   13.80
  -4   3  22   98.99   14.20
   3  -3 -22   44.60    8.20
   3  -3 -22   50.39   10.60
  -3   3  22   56.19   10.00
   2  -3 -22   39.30    7.60
   2  -3 -22   25.60    8.10
  -2   3  22   24.10    8.40
   1  -3 -22   55.79    8.20
   1  -3 -22   73.39   10.10
   0  -3 -22   25.30    6.50
   0  -3 -22    7.30    6.60
  -1  -3 -22   67.39    8.20
  -2  -3 -22   17.70    6.40
  -7   4  22   17.70    5.60
  -7   4  22   17.80   10.20
   6  -4 -22   22.00    6.30
   6  -4 -22   19.10    6.60
  -6   4  22   36.40   15.60
  -6   4  22   29.90    8.60
   5  -4 -22   32.40    7.30
   5  -4 -22   34.40    8.10
  -5   4  22   19.80    8.90
   4  -4 -22  163.58   16.40
   4  -4 -22  168.78   16.90
   4  -4 -22  172.28   14.00
   4  -4 -22  165.28   15.80
  -4   4  22  189.78   16.10
   3  -4 -22   30.90   10.60
   3  -4 -22   18.80    8.10
   3  -4 -22   19.10    8.10
   3  -4 -22   15.50    6.20
  -3   4  22   27.80    8.70
   2  -4 -22   85.99   10.10
   2  -4 -22  115.39   14.50
  -2   4  22   98.29   11.60
   1  -4 -22  206.88   14.90
   1  -4 -22  194.58   13.90
  -1   4  22  166.48   14.80
   0  -4 -22  116.69   12.70
   0  -4 -22  150.98   12.10
  -1  -4 -22  196.88   13.70
  -2  -4 -22   96.89   12.10
   6  -5 -22   26.00    6.20
  -6   5  22   36.70    8.00
  -6   5  22   36.10   13.90
   5  -5 -22   27.10    7.20
  -5   5  22   22.10    8.40
   4  -5 -22   55.69    8.40
   4  -5 -22   36.20    9.70
   4  -5 -22   47.80   11.20
  -4   5  22   59.79   10.20
   3  -5 -22   66.09   10.20
   3  -5 -22   81.09   10.50
   3  -5 -22   73.19   11.00
   3  -5 -22   57.69   10.90
  -3   5  22   42.70    9.70
   2  -5 -22   52.09    9.20
   2  -5 -22   38.20    7.30
   2  -5 -22   41.30    9.70
   2  -5 -22   65.39    9.90
  -2   5  22   41.80    9.20
   1  -5 -22   70.19   10.40
   1  -5 -22   59.29    9.30
  -1   5  22   68.99   11.30
   0  -5 -22   21.00    8.20
   0  -5 -22   30.50    8.80
  -1  -5 -22   59.09    8.80
  -2  -5 -22   60.79    9.20
   6  -6 -22   -6.40    5.10
  -6   6  22    1.90    8.20
   5  -6 -22   16.90    6.80
  -5   6  22   15.30    7.40
   4  -6 -22   12.50   14.00
   4  -6 -22   20.20    7.70
   4  -6 -22   19.80   10.50
  -4   6  22    9.50    8.10
   3  -6 -22    2.50    7.90
   3  -6 -22    5.70    9.30
   3  -6 -22   -0.10    6.50
  -3   6  22   15.30    9.30
   2  -6 -22   74.09   11.10
   2  -6 -22   80.49   12.10
   2  -6 -22   94.69   11.10
   2  -6 -22   83.89   11.20
   2  -6 -22   70.19   17.50
  -2   6  22  106.69   14.10
   1  -6 -22   23.60    9.20
   1  -6 -22   19.50    8.70
   1  -6 -22   26.80    8.90
  -1   6  22   17.90    9.80
   0  -6 -22    4.90    8.00
   0  -6 -22   15.70    9.30
   0  -6 -22   -0.50    8.20
  -1  -6 -22   36.20    9.00
  -1  -6 -22   34.40    9.40
   5  -7 -22   40.40    7.30
  -5   7  22   19.40    6.70
   4  -7 -22    1.60    6.90
   4  -7 -22    3.30    9.10
  -4   7  22   -1.30    7.00
   3  -7 -22   43.40   11.10
   3  -7 -22   48.50    9.00
   3  -7 -22   24.10    9.10
  -3   7  22    9.50    8.60
   2  -7 -22   19.60    9.10
   2  -7 -22   38.30   10.00
   2  -7 -22   39.90   11.10
   2  -7 -22   28.70    8.00
  -2   7  22   24.60    9.80
   1  -7 -22  136.39   16.60
   1  -7 -22  125.69   14.70
   1  -7 -22  118.69   19.20
  -1   7  22  117.19   15.90
   0  -7 -22   55.89   10.50
   0  -7 -22   58.79   14.70
  -1  -7 -22  112.99   15.80
  -2  -7 -22    9.50    8.80
   5  -8 -22   72.69    9.20
   4  -8 -22   51.39    7.80
   4  -8 -22    8.80    7.10
  -4   8  22   24.00    6.90
   3  -8 -22   -2.10    7.90
   3  -8 -22   13.60    7.40
   3  -8 -22    6.50    9.80
  -3   8  22   -2.40    7.40
   2  -8 -22  117.19   16.40
   2  -8 -22   89.09   12.10
   2  -8 -22   62.39   11.70
  -2   8  22   76.19   11.30
   1  -8 -22    9.60    9.10
   1  -8 -22   16.40   10.10
   1  -8 -22   13.10   10.30
  -1   8  22   18.00   10.10
   0  -8 -22  109.49   12.70
   0  -8 -22   76.29   18.00
   0   8  22   88.99   13.10
  -1  -8 -22    7.80    9.30
  -2  -8 -22   89.59   11.80
   4  -9 -22   56.89    7.40
   3  -9 -22   -2.80    8.20
   3  -9 -22    8.10    6.90
  -3   9  22   -6.80    5.70
   2  -9 -22   23.50    9.20
   2  -9 -22   30.40    8.90
   2  -9 -22    5.90    8.90
  -2   9  22   11.80    7.60
   1  -9 -22   -0.50    8.80
   1  -9 -22   12.70    9.90
   1  -9 -22    7.30    8.20
  -1   9  22   21.50    8.90
   0  -9 -22   16.20    9.50
   0  -9 -22    2.50    8.90
   0   9  22   37.60   10.30
  -1  -9 -22    3.90    9.10
  -2  -9 -22   14.80    8.50
   2 -10 -22   26.80    6.80
   2 -10 -22   12.00    7.50
   1 -10 -22    4.90    6.60
   1 -10 -22    6.90    7.80
  -1  10  22   -9.30    8.40
   0 -10 -22    1.00    6.60
   0 -10 -22   -2.80    8.10
   0  10  22   -0.40    7.20
  -1 -10 -22   -9.60    6.70
   1  10  22   10.00    7.60
  -2 -10 -22   30.60    7.60
  -2 -10  23    5.00    7.90
  -1 -10  23   58.49    8.30
  -1 -10  23   36.90    9.50
   0 -10  23   10.20    7.00
   1 -10  23   44.20    6.90
  -3  -9  23    4.80    5.50
  -3  -9  23    9.80    8.70
  -2  -9  23   27.20    8.50
  -2  -9  23   10.40   11.10
  -2  -9  23   17.10    9.60
  -1  -9  23   36.90   14.00
  -1  -9  23   31.00    9.50
   0  -9  23   23.70    9.70
   1  -9  23   31.30    7.60
   2  -9  23   17.90    5.30
   2  -9  23   30.10    6.70
   3  -9  23    5.30    5.40
  -4  -8  23   30.80   10.60
  -3  -8  23   21.30   12.20
  -2  -8  23   55.79   14.00
  -2  -8  23   66.49   10.90
  -1  -8  23    7.30    9.70
   0  -8  23   13.40   10.00
   1  -8  23    3.90    9.40
   2  -8  23   29.90    7.80
   2  -8  23   38.40    9.00
   3  -8  23   25.90    8.00
   4  -8  23   17.50    6.40
  -5  -7  23   27.00   10.40
  -4  -7  23   26.60   12.20
  -3  -7  23   12.30   14.50
  -3  -7  23   15.10   12.20
  -2  -7  23   -0.80    9.00
  -2  -7  23   17.80   12.70
  -1  -7  23  180.18   17.70
   0  -7  23   31.90   10.80
  -1   7 -23  136.79   15.50
   1  -7  23  169.78   17.10
  -2   7 -23   30.30    8.90
   2  -7  23    5.50    9.80
   3  -7  23   28.00    9.70
   4  -7  23   18.20    8.10
   5  -7  23    1.60    5.20
  -6  -6  23   16.50    7.60
  -5  -6  23   18.10   11.90
  -4  -6  23  -11.40   12.00
  -3  -6  23   12.10   12.50
  -3  -6  23    1.40    8.50
  -2  -6  23   80.39   11.60
  -1  -6  23   57.69   11.00
   0  -6  23   37.10   10.80
  -1   6 -23   49.30    9.60
   1  -6  23   65.09   11.50
  -2   6 -23   67.99   10.90
   2  -6  23   89.09   12.70
  -3   6 -23   -7.20    8.30
   4  -6  23    5.40    8.20
  -5   6 -23    0.30   23.10
   5  -6  23    6.50    6.90
  -6   6 -23    1.30    8.50
  -6  -5  23   10.10   10.60
  -5  -5  23   25.20   12.90
  -4  -5  23    3.50   11.90
  -3  -5  23   72.39   11.30
  -3  -5  23   69.49   14.30
  -2  -5  23   32.50    9.90
  -1  -5  23   11.00    8.90
   0   5 -23  107.79   12.40
   0  -5  23   93.19   12.10
  -1   5 -23    6.40    7.70
   1  -5  23    0.60    9.00
  -2   5 -23   28.10    9.10
  -2   5 -23   22.00   10.90
  -3   5 -23   77.39   11.10
  -3   5 -23   69.99   12.60
  -4   5 -23    9.90    8.30
  -4   5 -23   15.90   18.00
  -5   5 -23   32.20   19.90
   5  -5  23   31.50    9.70
  -6   5 -23   11.80   12.80
  -6  -4  23    3.20   11.60
  -5  -4  23   45.80   12.40
  -4  -4  23  154.88   23.10
  -3  -4  23   25.60    9.10
  -2  -4  23  139.79   13.90
  -2  -4  23  135.39   14.30
  -1  -4  23   93.09   12.80
   0   4 -23  213.38   14.00
   0  -4  23  170.48   16.20
  -1   4 -23   98.09   12.50
   1  -4  23   98.29   14.30
  -2   4 -23  173.78   14.80
  -2   4 -23  130.69   19.30
   2  -4  23  164.78   15.70
  -3   4 -23   -8.30   10.20
  -3   4 -23    8.00    8.10
  -4   4 -23  183.28   16.00
  -4   4 -23  211.28   28.30
  -5   4 -23   63.59   19.30
  -6   4 -23   -6.80   16.40
  -7  -3  23   58.39    9.80
  -6  -3  23   41.50   12.50
  -6  -3  23   25.50    6.90
   5   3 -23   65.09    8.90
  -5  -3  23   94.79   14.20
  -5  -3  23   77.39   11.60
   4   3 -23   12.80    7.20
  -4  -3  23    0.60   10.70
   3   3 -23   57.69    8.60
  -2  -3  23   23.60    7.90
  -1  -3  23   32.60    7.90
   0   3 -23   18.20    6.30
   0  -3  23   17.00    7.40
  -1   3 -23   31.40    7.40
   1  -3  23   26.10    8.10
  -2   3 -23   36.80    8.10
   2  -3  23   35.20    8.10
  -3   3 -23   66.49    9.70
  -3   3 -23   70.89   12.00
  -4   3 -23    2.10    7.60
  -4   3 -23    0.30   15.60
  -5   3 -23  110.89   20.50
  -6   3 -23   70.09   20.00
  -7   3 -23   46.60   15.10
   7   2 -23   12.10    5.20
  -7  -2  23    7.00    9.60
   6   2 -23    8.70    6.50
  -6  -2  23    0.40    7.00
  -6  -2  23  -10.90   11.10
   5   2 -23   66.89    9.50
  -5  -2  23   25.90   12.50
  -5  -2  23   53.59   11.70
   4   2 -23   41.20    9.70
   4   2 -23   28.70    8.40
   4   2 -23   36.60    8.40
  -4  -2  23   25.30   12.60
  -3  -2  23   60.29    9.60
  -2  -2  23   24.80    7.60
  -1  -2  23   14.60    7.00
   0   2 -23  112.29   10.30
   0  -2  23  101.89   10.80
  -1   2 -23   16.80    6.40
   1  -2  23   20.40    6.10
  -2   2 -23   42.30    8.20
  -3   2 -23   83.39   11.40
  -4   2 -23   39.50    8.10
  -4   2 -23   12.90   14.80
  -4   2 -23   19.50   10.60
  -5   2 -23   64.09   18.10
  -6   2 -23    8.00   17.50
  -7   2 -23    1.30   14.10
   7   1 -23   73.09    8.50
  -7  -1  23   82.59   12.40
  -7  -1  23   59.29    8.20
   6   1 -23   47.30    8.50
  -6  -1  23   57.79   14.30
  -6  -1  23   38.70    9.40
   5   1 -23  104.99   12.30
  -5  -1  23   89.39   12.90
  -5  -1  23   66.79   14.40
   4   1 -23   19.50    7.20
   4   1 -23    7.10    8.00
   4   1 -23    2.80    8.30
  -4  -1  23   37.40    9.60
   3   1 -23  185.48   15.40
   2   1 -23  133.49   11.90
  -2  -1  23  127.99   13.00
   1   1 -23   14.40    5.80
   1   1 -23   13.50    6.00
  -1  -1  23   20.80    6.40
   0   1 -23  139.29   10.60
   0  -1  23  121.59   10.70
  -1   1 -23   28.80    6.40
   1  -1  23   20.20    5.30
  -2   1 -23  128.79   11.30
  -3   1 -23  129.19   12.20
  -4   1 -23   19.50    7.40
  -4   1 -23   16.20   10.00
  -5   1 -23   72.99   19.00
  -6   1 -23   58.99   18.50
  -7   1 -23   88.89   16.70
   7   0 -23   14.50    6.10
  -7   0  23    4.30    6.00
  -7   0  23    3.80   11.20
   6   0 -23    3.70    6.90
  -6   0  23    5.50   13.30
  -6   0  23   -1.50    7.10
   5   0 -23    8.10    7.60
   5   0 -23    4.60    6.90
  -5   0  23   14.60   12.90
  -5   0  23    8.30    9.90
   4   0 -23   13.60    6.30
   4   0 -23   17.60    7.90
   4   0 -23   18.30    8.00
  -4   0  23   19.30    8.10
   3   0 -23   61.69    9.00
  -3   0  23   60.59    9.30
   2   0 -23   -0.70    5.70
   1   0 -23  114.79    9.80
   1   0 -23  120.29   10.50
  -1   0  23  122.39   11.00
   0   0 -23    0.00    5.70
   0   0  23    3.70    5.10
  -1   0 -23  115.99   10.70
  -2   0 -23    9.40    5.90
  -3   0 -23   64.99    8.30
  -5   0 -23    8.40   15.90
  -6   0 -23   -1.80   15.60
  -7   0 -23   24.00   13.70
   7  -1 -23   64.59    8.90
  -7   1  23   64.49    8.10
  -7   1  23  102.49   14.00
   6  -1 -23   53.59    8.50
  -6   1  23   30.90    8.80
  -6   1  23   51.89   10.00
  -6   1  23   37.30   15.10
   5  -1 -23   92.09   12.20
   5  -1 -23   95.09   11.10
  -5   1  23  104.79   15.90
  -5   1  23   97.79   12.80
   4  -1 -23   20.80    6.60
   4  -1 -23   32.20    7.30
   4  -1 -23   20.30    7.90
   4  -1 -23   23.20    7.90
  -4   1  23   22.60    8.90
   3  -1 -23  137.49   13.20
  -3   1  23  142.29   14.00
   2  -1 -23  127.09   12.00
   1  -1 -23   27.00    6.30
   1  -1 -23   24.50    6.50
   0  -1 -23  135.59   10.90
  -1  -1 -23   24.30    6.90
  -2  -1 -23  118.59   11.80
  -3  -1 -23  128.69   11.20
  -5  -1 -23   94.19   20.10
   7  -2 -23    6.80    5.90
  -7   2  23   17.90    6.20
  -7   2  23    6.90   11.30
   6  -2 -23    7.30    6.70
  -6   2  23    8.60    8.20
  -6   2  23   15.40   14.60
   5  -2 -23   48.50    8.50
   5  -2 -23   59.89    9.70
   5  -2 -23   44.50    8.00
  -5   2  23   59.69   10.80
   4  -2 -23   46.30    8.40
   4  -2 -23   29.40    7.30
   4  -2 -23   36.70    7.50
   4  -2 -23   42.30    8.50
  -4   2  23   41.00   10.20
   3  -2 -23   76.69    9.30
  -3   2  23   61.59   10.00
   2  -2 -23   37.00    7.80
   2  -2 -23   30.10    6.90
  -2   2  23   40.30    8.70
   1  -2 -23   22.20    6.20
   1  -2 -23   24.20    6.90
   0  -2 -23  109.09   11.00
  -1  -2 -23   15.90    6.50
  -2  -2 -23   39.40    7.00
  -3  -2 -23   57.79    7.90
   7  -3 -23   54.59    7.80
  -7   3  23   52.99    6.90
  -7   3  23   37.80   12.50
   6  -3 -23   54.39    8.10
  -6   3  23   47.60    9.30
  -6   3  23   89.69   16.60
   5  -3 -23   98.19   11.70
   5  -3 -23  111.99   13.10
  -5   3  23  105.39   14.80
   4  -3 -23   -2.80    7.40
   4  -3 -23   13.30    7.60
   4  -3 -23   17.30    6.70
   4  -3 -23    3.00    6.40
  -4   3  23   20.70    8.60
   3  -3 -23   65.39   11.00
   3  -3 -23   61.09    9.20
   3  -3 -23   51.99    8.80
   3  -3 -23   80.89   10.80
   3  -3 -23   96.79   14.30
  -3   3  23   62.89   10.20
   2  -3 -23   31.10    7.30
   2  -3 -23   24.00    7.90
  -2   3  23   16.00    8.20
   1  -3 -23   28.50    7.60
   1  -3 -23   42.10    7.40
[truncated: 154,062 more chars]
